# Supplementary material for: Tissue-specific responses of brain and lung endothelial cell miRNA and mRNA profiles to the ring-stage Plasmodium falciparum-infected red blood cells
Source: Research Square preprint supplement (doi:10.21203/rs.3.rs-4222036/v1), 2024-04-08
Supplement: Supplementary file 4 [file 44741c6c85138401323ee74c.xlsx]

## Sheet: Sheet1
Name	CPM	CPM	Mean	CPM	CPM	CPM	Mean	Fold change	Log fold change	P-value	FDR p-value
SLC40A1	34.324	42.197	38.2605	2.75514	4.40103	6.05496	4.40371	9.29196	3.21598	8.12579e-17	7.59949e-13
GDF15	182.835	126.591	154.713	33.6127	29.4319	18.8376	27.2941	5.60494	2.4867	1.13782e-16	7.59949e-13
CDKN1A	3902.06	2694.24	3298.15	662.52	879.931	874.941	805.797	4.0944	2.03365	1.40446e-13	4.6902e-10
RDH10	115.546	71.333	93.4395	13.9594	15.4036	21.1923	16.8518	5.60232	2.48602	1.2716e-13	4.6902e-10
RAB43	5.09762	11.3865	8.24205	55.6539	36.0335	63.2407	51.6427	-6.23278	-2.63988	2.62727e-11	7.019e-08
PTGDS	25.8279	32.8199	29.3239	6.06131	4.12597	3.36386	4.51705	6.08643	2.6056	4.32706e-10	9.63347e-07
PLK2	131.858	91.4268	111.643	34.8985	34.9332	34.3114	34.7144	3.21121	1.68312	8.53458e-10	1.62864e-06
FOXD1	3.39841	1.00469	2.20155	14.8778	27.2314	29.2656	23.7916	-10.6011	-3.40615	1.21749e-09	2.03291e-06
TP53INP1	165.503	115.874	140.688	31.9596	31.9075	56.8493	40.2388	3.51594	1.81391	4.24211e-09	6.29623e-06
HYOU1	168.561	386.471	277.516	1153.67	754.227	1179.71	1029.2	-3.70816	-1.8907	1.20309e-08	1.60708e-05
SDF2L1	7.47651	16.075	11.7758	61.1642	34.6581	74.005	56.6091	-4.78985	-2.25998	2.17931e-08	2.64647e-05
MSTO1	17.3319	27.7964	22.5642	86.8788	53.0875	96.2065	78.7243	-3.48273	-1.80022	2.49961e-08	2.78248e-05
NOTCH3	423.442	241.46	332.451	98.6341	118.828	115.381	110.948	2.99881	1.58439	2.79762e-08	2.87466e-05
RASGRF2	1.01952	4.01876	2.51914	27.9188	27.2314	9.75521	21.6351	-8.50698	-3.08865	9.99199e-08	9.53379e-05
AKAP2	58.7926	80.3752	69.5839	279.739	199.972	144.646	208.119	-2.99417	-1.58216	1.67706e-07	0.000149348
FAM212B	58.7926	40.8574	49.825	11.2042	14.0283	18.5013	14.5779	3.48157	1.79974	2.25408e-07	0.000188187
HIST2H2AA4	39.7614	9.37711	24.5693	4.5919	2.75065	3.70025	3.68093	6.5715	2.71622	4.26881e-07	0.000335428
F2RL2	83.2611	77.0262	80.1437	19.6533	30.5322	30.2748	26.8201	3.03835	1.60329	4.72734e-07	0.000344972
FICD	6.79683	10.0469	8.42186	57.858	14.8535	69.632	47.4478	-5.61217	-2.48856	4.90678e-07	0.000344972
MSTO2P	4.75778	5.35835	5.05806	39.123	12.653	28.2565	26.6775	-5.26335	-2.39598	6.38044e-07	0.000422207
HSPA5	1633.96	2778.64	2206.3	7338.78	4694.25	6583.42	6205.48	-2.81262	-1.49191	6.63748e-07	0.000422207
FAM46A	55.3941	34.1595	44.7768	12.49	12.928	14.4646	13.2942	3.38288	1.75825	7.04277e-07	0.000427624
ARRDC4	46.8981	40.8574	43.8778	10.4695	13.4782	16.8193	13.589	3.36058	1.74871	7.64132e-07	0.000443795
FOS	106.71	19.424	63.0671	13.2247	14.5784	6.39134	11.3981	5.49935	2.45926	1.21164e-06	0.00067438
G0S2	8.15619	11.7214	9.93879	0.734705	0.825194	2.35471	1.30487	8.34339	3.06063	1.27923e-06	0.000683517
SLFN11	10.8749	34.4944	22.6846	98.0831	48.6864	118.408	88.3925	-3.89017	-1.95983	1.39001e-06	0.000687695
SRXN1	764.303	1000.67	882.487	375.067	390.041	325.622	363.577	2.42533	1.27818	1.38039e-06	0.000687695
ABCA1	474.758	200.603	337.681	131.328	121.028	92.1699	114.842	2.9372	1.55444	1.80731e-06	0.000862217
STK17A	129.48	119.558	124.519	48.3068	50.8869	60.8859	53.3599	2.37551	1.24824	1.94358e-06	0.000895251
OSGIN1	181.135	295.714	238.425	107.451	95.4474	59.204	87.3673	2.72148	1.44439	2.01713e-06	0.00089816
BTG2	63.5503	35.499	49.5247	7.53072	15.6787	18.5013	13.9036	3.60149	1.84859	2.91907e-06	0.00125784
SEMA6D	33.3045	43.5366	38.4205	14.3267	9.90232	15.1374	13.1222	2.91778	1.54487	3.9656e-06	0.00165539
CCND2	267.115	179.505	223.31	78.9807	92.9718	106.635	92.8623	2.41169	1.27005	4.46039e-06	0.00180551
FASN	130.159	111.521	120.84	370.107	196.121	380.453	315.56	-2.61117	-1.38469	4.79816e-06	0.00188511
TBC1D3	29.2264	17.4146	23.3205	7.89807	4.95116	5.0458	5.96501	3.78313	1.91958	5.27882e-06	0.0020147
GMPPB	13.5937	37.5084	25.551	81.5522	51.7121	132.2	88.4881	-3.45613	-1.78916	5.47781e-06	0.00203257
LDLR	57.0934	109.511	83.3023	238.779	160.088	261.372	220.08	-2.64065	-1.40089	5.72717e-06	0.00206766
STOM	215.799	147.355	181.577	58.5927	74.5425	91.8335	74.9896	2.43095	1.28152	6.13594e-06	0.00215694
SERPING1	66.9487	30.4756	48.7122	8.08175	11.5527	19.8468	13.1604	3.73692	1.90185	7.37717e-06	0.00252678
KCNE4	209.002	231.414	220.208	114.981	91.0464	66.2681	90.7652	2.41357	1.27117	8.345e-06	0.00278681
GOLGA4	135.937	162.09	149.013	470.027	235.73	392.563	366.107	-2.4574	-1.29713	9.42562e-06	0.00307091
KSR1	62.8707	32.8199	47.8453	10.2859	15.1285	20.1832	15.1992	3.18061	1.6693	1.0292e-05	0.00327335
IGFBP3	88.6986	88.0778	88.3882	40.0414	35.4833	42.0483	39.191	2.25626	1.17393	1.23218e-05	0.00382777
AKR1C2	350.716	354.99	352.853	131.328	192.27	151.71	158.436	2.23108	1.15774	1.2724e-05	0.00386289
FAM196B	5.7773	9.712	7.74465	27.0004	28.8818	19.8468	25.243	-3.28062	-1.71397	1.49758e-05	0.00434885
MT1L	34.324	42.8668	38.5954	12.49	18.1543	11.1008	13.915	2.7722	1.47103	1.48441e-05	0.00434885
NRG1	26.5076	28.1313	27.3195	8.81645	9.62726	10.428	9.6239	2.88018	1.52616	1.61742e-05	0.00459692
FBXL6	9.51556	18.7542	14.1349	69.4296	26.9563	46.4213	47.6024	-3.36874	-1.75221	1.86182e-05	0.00518084
TNC	31.2654	46.5506	38.908	72.3684	145.234	87.7969	101.8	-2.61223	-1.38528	1.90044e-05	0.00518084
PEG10	244.346	183.188	213.767	64.2866	111.951	95.8701	90.7027	2.36282	1.24051	2.06373e-05	0.0054093
CA9	27.1873	4.35366	15.7705	2.38779	0.825194	3.36386	2.19228	7.14062	2.83605	2.06523e-05	0.0054093
HMGA2	48.5973	68.9887	58.793	105.981	145.234	135.564	128.926	-2.18618	-1.12841	2.12276e-05	0.00545303
PHLDA3	187.932	128.935	158.434	60.2458	83.8947	74.3414	72.8273	2.18129	1.12518	2.28168e-05	0.00575069
BCL2L11	30.9256	11.3865	21.156	4.40823	4.40103	6.72773	5.179	4.11552	2.04107	2.39508e-05	0.00592471
DERL3	0.679683	0.334897	0.50729	12.8573	2.47558	14.801	10.0446	-18.6112	-4.2181	2.47031e-05	0.0059997
CMBL	61.1714	34.8293	48.0003	14.6941	18.4293	19.8468	17.6567	2.73878	1.45353	2.56168e-05	0.00611053
MXI1	72.3862	64.6351	68.5106	30.4902	21.18	31.9567	27.8756	2.45145	1.29364	2.9124e-05	0.00682523
LCNL1	15.2929	3.01407	9.15347	0.183676	1.37532	1.34555	0.968182	9.65136	3.27073	2.96702e-05	0.00683336
AK4	41.4606	30.4756	35.9681	5.69396	8.80206	17.8285	10.7748	3.39452	1.76321	3.05838e-05	0.00692437
NPR3	201.526	191.226	196.376	75.4909	91.8716	108.989	92.1172	2.14755	1.10269	3.58181e-05	0.00797431
CHST2	24.1287	33.8246	28.9766	76.4093	47.3111	91.1607	71.627	-2.46734	-1.30296	3.92609e-05	0.00859749
EIF2AK3	17.6718	30.8105	24.2411	116.083	30.5322	92.8427	79.8194	-3.29117	-1.7186	4.20611e-05	0.00877894
NBEAL2	11.8944	16.4099	14.1522	45.1843	48.6864	26.5745	40.1484	-2.84657	-1.50923	4.17103e-05	0.00877894
FAM162A	70.3472	25.4521	47.8997	13.4084	16.5039	16.4829	15.4651	3.1014	1.63292	4.08e-05	0.00877894
GPM6B	46.8981	40.5225	43.7103	15.7961	20.3548	14.4646	16.8718	2.58964	1.37275	4.62741e-05	0.00950968
ATP8B1	4.75778	14.4006	9.57917	39.3067	29.4319	22.8743	30.5376	-3.19021	-1.67365	4.91973e-05	0.00995723
FCHO2	70.687	51.5741	61.1305	22.5922	25.3059	26.5745	24.8242	2.48286	1.312	5.11474e-05	0.0101883
HIST1H2AC	76.4643	22.4381	49.4512	11.7553	1.92545	16.4829	10.0546	4.91232	2.29641	5.25122e-05	0.0101883
HIST1H2BD	24.8084	4.01876	14.4136	3.12249	0.550129	2.01832	1.89698	7.35469	2.87866	5.26272e-05	0.0101883
AC026703.1	57.0934	45.8808	51.4871	18.3676	19.8046	25.9018	21.358	2.45949	1.29836	5.4464e-05	0.0102469
SNAI2	209.002	131.279	170.141	57.6743	65.7404	97.5521	73.6556	2.31714	1.21234	5.41573e-05	0.0102469
PDIA4	168.901	414.602	291.752	697.051	680.51	761.243	712.934	-2.44326	-1.28881	5.65052e-05	0.0104833
SLC17A9	0.679683	2.67917	1.67943	13.7757	10.7275	6.05496	10.1861	-6.04386	-2.59547	6.10584e-05	0.0111729
STX16-NPEPL1	0.339841	0.334897	0.337369	5.32661	10.7275	6.72773	7.59395	-20.2436	-4.33939	6.38329e-05	0.0115227
MDM2	437.376	270.596	353.986	83.2053	112.776	212.596	136.193	2.60259	1.37995	6.78367e-05	0.0119232
FMN1	15.6327	23.4428	19.5377	51.9803	44.2854	53.8218	50.0292	-2.55549	-1.3536	6.77229e-05	0.0119232
MYBBP1A	36.0232	38.848	37.4356	83.0216	73.9924	80.06	79.0246	-2.11968	-1.08385	6.98725e-05	0.0121215
KCNMA1	133.218	60.2814	96.7496	39.3067	47.036	30.9476	39.0968	2.46966	1.30431	7.07979e-05	0.0121246
NEXN	36.7029	44.5413	40.6221	91.1034	86.6453	76.0233	84.5907	-2.10175	-1.07159	7.38482e-05	0.0123574
FAM43A	27.1873	13.3959	20.2916	6.97969	5.22623	5.38218	5.8627	3.39584	1.76377	7.40077e-05	0.0123574
RRM2B	97.1946	80.7101	88.9524	28.8372	33.2828	55.1674	39.0958	2.29312	1.19731	8.12493e-05	0.0129206
AQP3	21.0702	8.70731	14.8887	4.04087	4.40103	1.68193	3.37461	4.27332	2.09536	7.98631e-05	0.0129206
SLITRK6	6.79683	8.37242	7.58462	1.46941	1.10026	1.68193	1.4172	5.27653	2.39959	8.03546e-05	0.0129206
CHMP1B	223.276	192.566	207.921	119.573	77.8433	92.5063	96.6409	2.1424	1.09923	7.94233e-05	0.0129206
MFAP4	71.0268	56.5975	63.8122	20.5717	26.9563	33.3023	26.9434	2.40448	1.26573	8.299e-05	0.0130421
IL4R	10.5351	19.7589	15.147	40.4087	34.9332	42.3847	39.2422	-2.58146	-1.36819	0.000112385	0.0174562
RRBP1	441.794	498.996	470.395	1066.61	884.332	899.834	950.258	-2.0217	-1.01557	0.000114	0.0175036
RP11-500M8.7	8.15619	5.35835	6.75727	1.10206	0	1.68193	0.927996	7.15961	2.83988	0.000120863	0.0183465
RCC2	277.311	264.903	271.107	122.145	151.561	139.937	137.881	1.97718	0.983442	0.000128513	0.0192885
GOLGB1	187.932	190.891	189.412	479.946	295.694	386.844	387.495	-2.04721	-1.03366	0.000135126	0.0200556
ERO1LB	4.0781	7.70262	5.89036	19.1023	13.4782	27.2473	19.9426	-3.34779	-1.74321	0.000143329	0.0210394
P4HA1	272.553	198.259	235.406	112.042	86.0952	139.937	112.691	2.09133	1.06442	0.000153751	0.022324
SESN1	56.4137	39.1829	47.7983	13.041	19.8046	24.8926	19.2461	2.51817	1.33237	0.000159365	0.0224325
FYN	135.597	100.134	117.865	63.1846	49.5116	61.2223	57.9728	2.02829	1.02027	0.000161216	0.0224325
ICAM1	1.69921	1.67448	1.68685	12.1226	1.92545	23.8834	12.6438	-7.34104	-2.87599	0.000159992	0.0224325
CRELD2	27.1873	47.8902	37.5388	82.6543	69.8664	93.179	81.8999	-2.17758	-1.12273	0.000157121	0.0224325
NDRG1	398.634	204.957	301.795	143.084	159.262	98.5612	133.636	2.25606	1.17381	0.000165177	0.0225147
NUPR1	206.624	141.661	174.142	105.43	70.4165	70.6412	82.1626	2.11093	1.07788	0.000163828	0.0225147
ABCC3	69.3276	58.6069	63.9673	135.369	134.507	102.934	124.27	-1.95093	-0.96416	0.000167441	0.0225927
ZMAT3	148.171	111.186	129.678	37.1026	47.3111	85.4422	56.6186	2.29977	1.20149	0.000189284	0.0247888
SEC23B	41.8005	49.5647	45.6826	99.1851	71.2417	129.172	99.8664	-2.18142	-1.12527	0.000187102	0.0247888
CHRDL1	13.9335	3.34897	8.64123	0.183676	0	2.69109	0.958256	9.19859	3.20141	0.000188955	0.0247888
CABYR	24.4686	28.1313	26.2999	6.42866	14.3034	6.39134	9.04112	2.91746	1.54471	0.000197498	0.0256133
PCNA	134.577	165.104	149.841	53.6334	84.7199	88.4696	75.6076	1.99132	0.993728	0.000202509	0.0260108
FAXDC2	26.8475	14.7355	20.7915	5.87764	9.62726	5.0458	6.85023	3.02402	1.59647	0.000205513	0.0261452
FAS	78.5034	54.2533	66.3783	8.81645	19.2545	37.3389	21.8033	3.06399	1.61541	0.000211554	0.0265125
HERPUD1	186.233	199.933	193.083	769.787	170.815	753.842	564.815	-2.92498	-1.54843	0.00021237	0.0265125
GAB1	49.6168	36.1688	42.8928	19.6533	17.8792	17.1557	18.2294	2.32454	1.21695	0.000219545	0.0266792
CDK2AP2	15.6327	35.499	25.5659	80.8175	52.5373	60.5496	64.6348	-2.5297	-1.33896	0.00021733	0.0266792
PDPK2	3.39841	2.67917	3.03879	21.8575	5.22623	14.4646	13.8494	-4.54522	-2.18435	0.000219697	0.0266792
IL8	9.51556	48.2251	28.8703	157.227	40.1594	115.717	104.368	-3.61254	-1.85301	0.000222388	0.0267627
GCLC	566.176	820.497	693.336	311.882	264.337	426.874	334.364	2.07479	1.05297	0.000225125	0.0268502
PIK3IP1	35.0037	21.4334	28.2185	9.36748	11.0026	14.1282	11.4994	2.49359	1.31822	0.000233107	0.0275561
RRP9	9.17572	8.70731	8.94151	26.8167	18.7044	21.5287	22.3499	-2.53592	-1.34251	0.000261324	0.0294606
HIST1H1C	15.9725	8.70731	12.3399	2.20411	3.57584	4.03664	3.2722	3.89604	1.96201	0.000254341	0.0294606
PODXL	2.03905	4.35366	3.19635	18.735	26.9563	3.36386	16.3517	-5.08408	-2.34599	0.000261745	0.0294606
HSP90B1	1035.5	1424.99	1230.24	2782.14	1909.77	2791.67	2494.53	-2.02765	-1.01981	0.000257252	0.0294606
YPEL3	75.1049	60.2814	67.6932	34.8985	34.6581	18.8376	29.4647	2.27406	1.18527	0.000253377	0.0294606
CYB561	7.47651	6.02814	6.75232	21.8575	11.2776	32.6295	21.9215	-3.22317	-1.68848	0.000262451	0.0294606
HS6ST1	149.19	122.237	135.714	65.3887	77.2931	72.9959	71.8926	1.89781	0.924336	0.000267763	0.0295602
ZBED3	29.5662	34.1595	31.8628	12.8573	11.5527	15.8102	13.4067	2.41115	1.26972	0.00026577	0.0295602
S1PR3	191.331	175.151	183.241	55.4702	104.249	103.271	87.6634	2.09717	1.06844	0.00027617	0.0302384
NR4A1	111.468	13.7308	62.5994	24.4289	3.02571	7.4005	11.6184	5.34893	2.41925	0.000281011	0.0305182
CAD	55.3941	87.7429	71.5685	141.247	151.285	139.6	144.044	-2.01138	-1.00819	0.000285938	0.0308029
HMGCS1	29.906	42.5319	36.219	74.9399	49.7867	158.102	94.2761	-2.5975	-1.37712	0.000290717	0.0308206
AKR1C1	1225.81	2219.03	1722.42	739.847	1025.99	665.036	810.291	2.1256	1.08787	0.000289909	0.0308206
SERPINE2	132.878	221.032	176.955	67.9602	53.9126	114.708	78.8602	2.24793	1.16859	0.000301984	0.0315149
ACACA	37.3826	59.6116	48.4971	114.063	87.7456	97.5521	99.7868	-2.06018	-1.04277	0.000301079	0.0315149
YPEL5	141.034	121.567	131.301	70.1643	56.6633	78.378	68.4019	1.92317	0.943488	0.000327588	0.033063
MAN1A1	141.714	110.851	126.282	54.3681	72.342	71.3139	66.008	1.92475	0.944668	0.000329194	0.033063
TNFAIP3	8.49603	6.69793	7.59698	40.0414	8.25194	33.975	27.4228	-3.60318	-1.84927	0.000322611	0.033063
COG1	49.9567	39.1829	44.5698	102.308	71.2417	96.2065	89.9186	-2.02063	-1.01481	0.000319467	0.033063
HID1	0.339841	0.334897	0.337369	7.89807	2.47558	7.4005	5.92472	-16.0903	-4.00812	0.00032886	0.033063
TRIM16L	129.14	147.355	138.247	45.1843	85.27	74.3414	68.2652	2.03306	1.02365	0.000340915	0.0339846
RNF103	80.5424	70.6632	75.6028	39.8577	36.0335	33.3023	36.3978	2.04183	1.02986	0.000354113	0.0350388
CDON	21.7498	5.02345	13.3866	1.28573	3.8509	3.36386	2.8335	4.77559	2.25568	0.000360811	0.0354391
SEL1L3	108.07	147.02	127.545	52.164	74.8176	70.3048	65.7621	1.94869	0.962505	0.000366249	0.0357106
MIA3	98.2142	117.884	108.049	268.902	154.586	227.061	216.85	-2.00824	-1.00593	0.000379403	0.0364609
HTATIP2	86.3197	81.045	83.6823	28.6535	50.6119	43.3939	40.8864	2.06177	1.04388	0.000377043	0.0364609
CYR61	46.2184	106.162	76.1903	255.677	204.373	105.625	188.558	-2.47579	-1.30789	0.000388616	0.0370795
PALM	13.2538	2.67917	7.96649	1.28573	1.92545	0.672773	1.29465	5.9384	2.57007	0.000395	0.0374213
TRIM27	63.8902	52.9137	58.4019	123.063	92.4217	120.763	112.082	-1.9212	-0.942004	0.000403882	0.0379934
PYCRL	3.05857	3.68386	3.37122	12.3063	9.35219	12.7827	11.4804	-3.39237	-1.76229	0.000417849	0.0390324
ALDH18A1	68.648	75.0169	71.8324	143.267	114.152	154.738	137.386	-1.91052	-0.933968	0.000428381	0.0397383
SPATA18	42.82	17.7495	30.2848	5.51028	9.90232	15.8102	10.4076	2.94162	1.55661	0.000437543	0.0403082
ZNF746	77.4838	86.0684	81.7761	39.3067	49.2365	38.6844	42.4092	1.93522	0.952501	0.000471187	0.0431104
PREB	38.0622	52.2439	45.1531	90.9197	67.6659	120.763	93.1161	-2.0575	-1.0409	0.000506177	0.0456859
EEFSEC	5.43746	10.0469	7.74218	20.7554	21.18	19.8468	20.5941	-2.65471	-1.40855	0.000504089	0.0456859
NES	20.7303	28.8011	24.7657	50.3273	81.9692	40.3664	57.5543	-2.32285	-1.21589	0.000525746	0.0457592
SNX18	108.409	90.0872	99.2483	41.8782	55.8381	58.8676	52.1946	1.9197	0.94088	0.000524784	0.0457592
PPRC1	47.5778	35.1641	41.371	109.838	64.3651	80.06	84.7545	-2.05462	-1.03887	0.000511012	0.0457592
TSKU	91.7572	60.9512	76.3542	24.4289	31.3574	48.1033	34.6298	2.22039	1.15081	0.000527543	0.0457592
CCDC41	1.69921	7.03283	4.36602	17.6329	10.7275	17.4921	15.2842	-3.47799	-1.79825	0.000518634	0.0457592
FDXR	76.4643	35.8339	56.1491	11.2042	26.4062	26.5745	21.395	2.63837	1.39965	0.000522867	0.0457592
GPR146	7.47651	1.00469	4.2406	0.183676	0.550129	0	0.244602	15.0582	3.91248	0.000541015	0.0458488
TRIM22	68.9878	28.1313	48.5596	5.32661	16.5039	24.5562	15.4622	3.15893	1.65943	0.000546806	0.0458488
SLC7A6	25.8279	36.8386	31.3333	79.3481	49.7867	70.9775	66.7041	-2.13131	-1.09174	0.000536722	0.0458488
MLKL	5.7773	3.34897	4.56313	15.7961	14.8535	11.4371	14.0289	-3.14848	-1.65466	0.00054917	0.0458488
FOSB	32.2849	5.69324	18.9891	4.04087	7.15168	2.35471	4.51575	4.16622	2.05874	0.000541857	0.0458488
AKAP17A	58.4527	58.9418	58.6973	174.86	88.0206	99.5704	120.817	-2.06276	-1.04458	0.000546641	0.0458488
SESN3	11.2148	3.01407	7.11442	0.918381	1.37532	1.68193	1.32521	5.42213	2.43886	0.000554109	0.0459739
CYP1B1	792.51	740.457	766.483	375.25	249.759	506.598	377.202	2.03271	1.02341	0.000558128	0.0460215
FMO5	5.09762	2.34428	3.72095	0.183676	0.550129	0.336386	0.356731	10.195	3.34979	0.000566782	0.0464483
FTSJ1	41.1208	45.8808	43.5008	111.859	64.6402	84.433	86.9773	-2.00507	-1.00365	0.0005808	0.0473068
PTPN13	273.232	187.207	230.22	99.7361	129.555	131.863	120.385	1.91669	0.938614	0.000599539	0.0485373
TNFRSF10D	477.137	466.511	471.824	247.412	259.386	270.455	259.084	1.82911	0.871146	0.000604924	0.0486782
PLOD2	274.932	262.224	268.578	147.492	146.059	148.01	147.187	1.82445	0.867462	0.000611312	0.0488977
OLFML2A	48.2575	19.424	33.8407	6.79602	16.2288	13.1191	12.048	2.82567	1.49859	0.000615341	0.0489269
GNL3	79.8627	71.6679	75.7653	223.534	94.6222	164.157	160.771	-2.12356	-1.08649	0.000631804	0.0499387
PRSS35	15.6327	3.01407	9.32339	1.46941	2.75065	1.34555	1.8552	4.96151	2.31078	0.000675833	0.0531046
NFKB1	28.8865	32.1501	30.5183	88.8992	45.1106	63.9134	65.9744	-2.16789	-1.11629	0.000696418	0.053878
TUBB2A	36.0232	57.2673	46.6453	90.185	113.602	75.3506	93.0457	-1.99513	-0.996481	0.000696618	0.053878
PRRG1	50.9762	48.2251	49.6007	20.9391	18.9795	29.9384	23.2856	2.17059	1.11809	0.000697777	0.053878
BBC3	44.8591	43.8715	44.3653	22.2248	18.7044	21.8651	20.9314	2.10478	1.07367	0.000724285	0.0556034
ANKHD1	89.3783	92.0966	90.7374	229.411	123.779	184.676	179.289	-1.97779	-0.98389	0.000754031	0.0575563
ECE2	1.01952	1.33959	1.17956	6.79602	4.6761	7.4005	6.29087	-5.21425	-2.38246	0.000785462	0.059278
EHD4	22.7694	19.7589	21.2641	43.7149	40.1594	54.4946	46.123	-2.14744	-1.10262	0.000782355	0.059278
WFS1	54.0348	51.2392	52.637	89.8176	91.8716	115.381	99.0232	-1.86732	-0.900968	0.000801608	0.0601566
C3orf58	84.2807	109.846	97.0634	58.409	41.5347	52.8127	50.9188	1.89831	0.924718	0.000816726	0.0602753
LARP1B	19.0311	21.4334	20.2323	60.4294	30.2571	48.776	46.4875	-2.30316	-1.20362	0.000808245	0.0602753
DNAJB9	35.0037	65.3048	50.1543	186.615	32.1825	286.265	168.354	-3.35443	-1.74607	0.000812248	0.0602753
RGPD5	2.37889	1.00469	1.69179	37.8373	2.75065	1.68193	14.09	-8.22159	-3.03942	0.000855593	0.0619048
DDR1	106.71	61.2861	83.9981	43.5312	45.6607	38.6844	42.6255	1.9662	0.975411	0.000861977	0.0619048
HSPA1A	114.527	481.916	298.221	1893.7	356.484	773.689	1007.96	-3.37982	-1.75695	0.000850349	0.0619048
PLAU	8.83588	55.5928	32.2144	57.6743	190.07	75.6869	107.81	-3.34307	-1.74117	0.000861417	0.0619048
AC141586.5	4.41794	2.67917	3.54856	18.3676	6.87661	12.4463	12.5635	-3.55322	-1.82913	0.000855076	0.0619048
SHB	14.953	13.7308	14.3419	38.021	36.0335	24.2198	32.7581	-2.31004	-1.20792	0.000868961	0.0620727
SYVN1	78.1635	97.7898	87.9767	240.983	102.874	216.969	186.942	-2.12515	-1.08756	0.000875071	0.0621766
CCDC57	14.6132	12.3912	13.5022	23.3269	36.8586	34.3114	31.499	-2.30507	-1.20481	0.000901728	0.0637317
AC104654.2	3.05857	3.34897	3.20377	0.367352	0.275065	0.336386	0.326268	8.8394	3.14395	0.000919758	0.0642865
HIST1H2BK	36.363	10.7167	23.5399	11.2042	3.30077	6.39134	6.96545	3.33313	1.73688	0.000924623	0.0642865
LDHA	1180.61	1150.04	1165.32	546.253	777.607	574.884	632.915	1.8416	0.880963	0.000928829	0.0642865
NR0B1	11.5546	13.7308	12.6427	5.14293	4.40103	3.02748	4.19048	2.86454	1.51831	0.000915565	0.0642865
VWCE	23.4491	9.04221	16.2456	4.95926	5.22623	5.71857	5.30135	3.06535	1.61605	0.000948016	0.0652763
SRPRB	43.4997	68.9887	56.2442	129.675	78.3934	124.127	110.732	-1.96883	-0.977335	0.000967329	0.0659264
RP11-432B6.3	4.0781	5.02345	4.55077	1.10206	0	0.672773	0.59161	6.57326	2.71661	0.00096633	0.0659264
HSPA1B	111.808	413.932	262.87	1449.02	289.643	727.604	822.089	-3.12729	-1.64491	0.000974898	0.066105
ATAD3A	31.2654	53.2486	42.257	109.655	80.0438	66.6045	85.4343	-2.02652	-1.019	0.000992066	0.0663104
GADD45A	151.569	144.675	148.122	100.287	60.7893	81.4055	80.8273	1.8255	0.868292	0.000995073	0.0663104
PIM1	76.4643	71.333	73.8986	36.5516	38.7841	42.3847	39.2401	1.90627	0.930754	0.000996311	0.0663104
PREX1	7.13667	4.68855	5.91261	26.633	20.3548	8.07327	18.3537	-3.12102	-1.64202	0.000997783	0.0663104
SLC6A9	154.288	131.614	142.951	74.9399	70.9666	96.8793	80.9286	1.77614	0.828742	0.00103188	0.0678497
FGF5	5.7773	9.37711	7.5772	29.2045	21.7301	11.7735	20.9027	-2.77679	-1.47342	0.00103618	0.0678497
RP11-514P8.6	2.37889	0	1.18944	7.53072	3.02571	11.7735	7.44332	-6.10383	-2.60971	0.00103539	0.0678497
MROH1	23.1092	46.2157	34.6625	88.3482	71.5168	56.8493	72.2381	-2.08759	-1.06184	0.00104158	0.0678707
HHIP	20.7303	19.7589	20.2446	7.16337	11.2776	5.71857	8.05319	2.5078	1.32642	0.00106466	0.0690378
LRP8	10.8749	32.1501	21.5125	51.062	56.9384	44.403	50.8011	-2.35928	-1.23834	0.00109054	0.0690401
RP11-443P15.2	49.9567	48.8949	49.4258	15.0614	24.2057	29.9384	23.0685	2.17571	1.12149	0.0010793	0.0690401
MDN1	38.7419	53.5835	46.1627	83.5726	100.399	76.0233	86.6648	-1.87758	-0.908876	0.00108603	0.0690401
TMEM116	11.2148	8.03752	9.62614	1.83676	3.02571	4.03664	2.96637	3.47711	1.79789	0.00107185	0.0690401
SIPA1L3	20.3905	30.4756	25.433	56.5722	58.3137	43.3939	52.7599	-2.08309	-1.05873	0.0010877	0.0690401
MANF	76.4643	149.364	112.914	272.575	165.314	255.654	231.181	-2.0473	-1.03372	0.0010966	0.0690961
PLTP	66.6089	34.4944	50.5516	20.7554	22.8304	25.229	22.9382	2.21048	1.14436	0.00113853	0.0714014
MARCH4	5.7773	6.36304	6.07017	17.6329	27.7815	8.74605	18.0535	-2.97436	-1.57258	0.00115046	0.0717797
HSPA4L	23.4491	21.4334	22.4412	9.18381	7.42674	12.1099	9.57349	2.38636	1.25481	0.00115531	0.0717797
RP4-539M6.19	0	0.334897	0.167448	7.89807	2.20052	5.0458	5.04813	-25.3538	-4.66413	0.00117358	0.0725775
NUCB2	61.1714	72.6726	66.922	119.389	100.399	142.628	120.805	-1.80046	-0.848369	0.00118554	0.0726444
C2CD2L	11.8944	22.4381	17.1663	62.8172	22.5553	44.403	43.2585	-2.52185	-1.33448	0.00118287	0.0726444
ARRB1	4.0781	3.01407	3.54608	0.734705	0.275065	0	0.33659	7.96084	2.99292	0.00120186	0.0733077
PGM2L1	44.5192	29.4709	36.9951	18.3676	13.7532	18.5013	16.874	2.18358	1.12669	0.00122416	0.0743288
ENC1	7.13667	8.03752	7.58709	11.2042	27.5065	24.2198	20.9768	-2.73185	-1.44988	0.00126163	0.0755731
RASA3	44.1794	46.2157	45.1976	94.4095	95.4474	63.9134	84.5901	-1.88005	-0.910772	0.00126085	0.0755731
LITAF	137.296	120.228	128.762	76.7766	42.3599	82.0783	67.0716	1.91923	0.940524	0.00125478	0.0755731
MT1G	3.39841	8.03752	5.71797	1.46941	0.825194	0.672773	0.989125	5.27362	2.39879	0.00130597	0.0778799
MKNK2	291.244	228.734	259.989	169.9	135.607	117.735	141.081	1.83621	0.876732	0.0013518	0.0802549
PDGFRB	500.246	307.77	404.008	157.043	243.707	239.844	213.531	1.89384	0.921314	0.00138136	0.081287
RTEL1-TNFRSF6B	6.11714	7.03283	6.57499	18.3676	20.0797	12.1099	16.8524	-2.59728	-1.377	0.00137682	0.081287
FER1L4	80.8822	27.4615	54.1719	24.98	23.1054	20.856	22.9804	2.35095	1.23324	0.00143103	0.0834749
LAMA5	18.6913	21.0985	19.8949	66.1234	89.1209	15.8102	57.0182	-2.86632	-1.5192	0.00142553	0.0834749
INPP5D	3.05857	2.00938	2.53398	0	0.275065	0	0.0916882	21.8074	4.44674	0.00146102	0.0848533
SERPINF1	77.144	75.3517	76.2479	47.2048	43.1851	31.2839	40.5579	1.85034	0.887788	0.0014726	0.0851559
PTCHD4	15.2929	4.68855	9.99071	1.10206	1.37532	4.70941	2.3956	4.28381	2.0989	0.00156519	0.0893498
SLC25A25	14.953	16.4099	15.6815	73.4705	21.7301	28.5928	41.2645	-2.63857	-1.39976	0.00155907	0.0893498
PLEKHO2	100.253	76.6913	88.4723	42.2455	46.2108	57.8585	48.7716	1.82924	0.871244	0.00155696	0.0893498
CTD-2545G14.7	14.2733	0	7.13667	0	0	0	0	207.263	7.69532	0.00159647	0.0907474
NOP58	34.6638	47.8902	41.277	92.7564	59.9641	80.06	77.5935	-1.88319	-0.913178	0.00162987	0.0918643
ITM2B	179.096	168.118	173.607	89.0829	96.5476	112.689	99.44	1.76344	0.818388	0.00162523	0.0918643
SEC24A	42.82	57.6022	50.2111	176.145	46.4859	126.481	116.371	-2.31822	-1.21302	0.001638	0.0919345
ARRDC3	59.1324	51.5741	55.3532	27.7351	27.2314	28.5928	27.8531	1.9891	0.992113	0.00165749	0.0926391
TCEA3	21.7498	4.68855	13.2192	2.20411	4.95116	3.70025	3.61851	3.66812	1.87504	0.00166552	0.0926998
RELB	9.8554	6.02814	7.94177	35.0821	7.15168	31.2839	24.5059	-3.08093	-1.62337	0.00169636	0.0940248
ZP1	4.0781	1.33959	2.70884	0	0.275065	0.336386	0.203817	13.4298	3.74736	0.00171535	0.0946472
BORA	3.39841	5.69324	4.54583	7.53072	12.1028	25.9018	15.1784	-3.28389	-1.71541	0.00172176	0.0946472
PINK1-AS	6.11714	11.7214	8.91926	18.0003	20.6298	25.5654	21.3985	-2.35591	-1.23628	0.0017604	0.0962138
GOLIM4	63.2105	85.7335	74.472	142.533	123.229	124.799	130.187	-1.75255	-0.809459	0.00177187	0.0962138
ULK1	246.725	197.924	222.324	148.41	110.301	114.371	124.361	1.78062	0.83238	0.00176477	0.0962138
ACTA2	91.0775	52.9137	71.9956	15.4288	26.1311	48.776	30.112	2.40328	1.265	0.00180278	0.0968217
CA12	119.624	78.0309	98.8275	41.1435	70.4165	40.7028	50.7542	1.94764	0.961725	0.00180481	0.0968217
EFNB1	73.4057	26.7917	50.0987	13.4084	28.8818	18.5013	20.2638	2.47622	1.30814	0.00179252	0.0968217
ETV4	4.75778	10.3818	7.56979	16.1635	29.982	15.1374	20.4276	-2.68637	-1.42566	0.00182074	0.0972856
ADAMTS5	68.648	39.5178	54.0829	22.2248	18.1543	34.3114	24.8968	2.18324	1.12647	0.0018304	0.0974124
DSEL	290.225	212.659	251.442	136.471	136.707	152.719	141.966	1.77357	0.826653	0.00184827	0.0976624
TIMP1	917.232	617.884	767.558	433.292	442.854	412.41	429.519	1.78661	0.837227	0.00184972	0.0976624
VEPH1	11.2148	17.4146	14.3147	25.8983	35.7584	32.9659	31.5409	-2.17705	-1.12237	0.00187992	0.0979915
HNRNPD	76.1245	86.0684	81.0965	134.451	144.409	148.01	142.29	-1.74213	-0.800852	0.00187566	0.0979915
THBS2	133.218	84.0591	108.638	52.8987	60.5142	63.577	58.9967	1.84629	0.884633	0.0018659	0.0979915
YPEL4	9.8554	2.00938	5.93239	1.28573	0.275065	1.34555	0.968781	5.89865	2.56038	0.0018853	0.0979915
CLINT1	74.4253	82.3846	78.4049	168.982	94.0721	189.722	150.925	-1.92411	-0.94419	0.0019143	0.0991132
UAP1	54.3746	70.9981	62.6864	118.838	110.026	99.5704	109.478	-1.75457	-0.811116	0.00196879	0.0999387
PKDCC	124.722	99.1294	111.926	29.5719	48.9615	82.7511	53.7615	2.09017	1.06362	0.00195114	0.0999387
ETV1	3.05857	18.7542	10.9064	20.5717	36.5836	33.975	30.3768	-2.77371	-1.47182	0.00195045	0.0999387
NOL6	57.0934	58.9418	58.0176	134.818	89.671	92.1699	105.553	-1.82696	-0.869446	0.00197222	0.0999387
FBF1	3.73826	4.68855	4.2134	12.3063	16.5039	8.40966	12.4066	-2.95279	-1.56208	0.00197513	0.0999387
HMOX1	2725.53	2305.43	2515.48	1930.07	1023.79	736.686	1230.18	2.04435	1.03164	0.00195712	0.0999387
MFSD2A	1.69921	2.67917	2.18919	8.08175	7.15168	9.08243	8.10529	-3.62871	-1.85946	0.00199973	0.100422
HIST1H4H	5.43746	3.01407	4.22577	0.551028	0.550129	1.34555	0.815568	5.44026	2.44368	0.00199876	0.100422
GNL2	40.1013	45.5459	42.8236	113.144	66.0155	65.259	81.473	-1.9099	-0.933494	0.0020247	0.101296
AKR1C3	27.1873	22.1032	24.6452	2.38779	13.2031	10.0916	8.56083	2.90626	1.53916	0.00204233	0.101797
ARHGEF28	15.6327	30.8105	23.2216	55.1028	63.815	34.3114	51.0764	-2.20187	-1.13873	0.00204998	0.101798
DHDDS	39.7614	32.485	36.1232	77.695	45.9358	85.4422	69.691	-1.92804	-0.947137	0.00211231	0.104505
SH2D5	2.37889	3.34897	2.86393	18.1839	14.0283	2.35471	11.5223	-4.01786	-2.00643	0.00213954	0.105099
SIPA1L2	39.7614	20.4287	30.0951	13.592	8.25194	16.4829	12.7756	2.35818	1.23767	0.00216603	0.105099
DNAJB11	70.687	120.228	95.4575	190.656	133.131	217.306	180.364	-1.8884	-0.917167	0.00217153	0.105099
ANGPTL2	53.6949	12.3912	33.0431	8.08175	18.1543	6.72773	10.9879	3.00095	1.58542	0.00215812	0.105099
FAM13C	10.5351	3.68386	7.10947	0.551028	0.825194	3.36386	1.58003	4.69145	2.23003	0.00217021	0.105099
KIFC3	26.5076	43.5366	35.0221	103.593	57.7636	53.1491	71.502	-2.04703	-1.03353	0.00216017	0.105099
ASNS	388.439	443.738	416.088	233.269	236.005	264.736	244.67	1.70633	0.7709	0.00222262	0.107183
PPM1D	54.0348	41.8621	47.9484	27.1841	21.7301	22.8743	23.9295	1.97247	0.98	0.00225327	0.10827
MEGF9	75.4448	78.0309	76.7379	38.9393	54.1877	32.6295	41.9188	1.82673	0.869266	0.00227776	0.109055
VIMP	64.9097	77.3611	71.1354	166.043	83.3446	149.356	132.914	-1.86928	-0.902481	0.00229122	0.109308
RASSF1	20.0506	36.1688	28.1097	86.5115	31.3574	75.0142	64.2943	-2.28713	-1.19354	0.00241372	0.114742
ANXA10	3.05857	5.69324	4.37591	0.551028	1.10026	1.00916	0.886815	5.11287	2.35413	0.0024734	0.117162
FLJ00418	6.79683	11.3865	9.09166	4.04087	2.20052	1.34555	2.52898	3.32303	1.7325	0.00250693	0.118331
AOX1	108.749	112.19	110.47	59.5111	67.6659	68.6228	65.2666	1.71387	0.777258	0.00252879	0.118942
PDE4D	74.4253	77.696	76.0606	31.0413	31.9075	57.5221	40.1569	1.90845	0.932403	0.0025447	0.11895
CORO7	6.79683	7.70262	7.24973	21.4901	19.2545	11.7735	17.506	-2.45207	-1.294	0.00254677	0.11895
SMAD3	171.96	104.153	138.056	62.2662	100.399	61.8951	74.8533	1.84458	0.883293	0.00259762	0.120903
NTN4	5.09762	4.01876	4.55819	30.1229	16.5039	3.02748	16.5514	-3.6333	-1.86128	0.00262081	0.121519
ZFP36	55.0543	28.1313	41.5928	24.7963	17.054	15.4738	19.108	2.15444	1.10731	0.00262906	0.121519
MEF2B	2.71873	3.68386	3.2013	0	0.825194	0.672773	0.499322	7.20481	2.84896	0.00264269	0.121728
NBPF15	50.9762	58.272	54.6241	87.9809	104.8	95.5338	96.1047	-1.74765	-0.805415	0.00267672	0.122816
XPC	159.725	117.214	138.47	73.1031	87.4705	87.7969	82.7902	1.67873	0.747366	0.0026847	0.122816
MIR3654	5.09762	4.68855	4.89309	15.9798	14.5784	8.40966	12.9893	-2.70381	-1.43499	0.00272694	0.124322
MVK	5.43746	9.712	7.57473	14.6941	17.6041	24.2198	18.8393	-2.43971	-1.28671	0.00278939	0.126737
CPEB2	133.218	107.837	120.527	79.8991	56.6633	72.3231	69.6285	1.72457	0.786234	0.00282012	0.126753
CXXC5	108.409	52.5788	80.4941	36.3679	49.2365	39.6936	41.766	1.92841	0.947413	0.00282076	0.126753
ZNF853	4.75778	4.01876	4.38827	14.6941	12.653	8.40966	11.9189	-2.78481	-1.47758	0.00282771	0.126753
FARSA	32.6248	41.5272	37.076	73.2868	61.8895	61.2223	65.4662	-1.78106	-0.832736	0.00282691	0.126753
AKAP12	69.6675	112.525	91.0964	285.8	161.188	112.689	186.559	-2.04982	-1.0355	0.00284906	0.126859
KIF7	15.9725	19.7589	17.8657	45.1843	38.509	25.9018	36.5317	-2.06259	-1.04445	0.0028413	0.126859
DNAJC3	85.64	172.807	129.223	305.086	167.514	289.965	254.188	-1.96693	-0.975944	0.00285865	0.126863
EGR1	306.537	91.7617	199.149	67.7765	132.856	46.0849	82.2392	2.4205	1.27531	0.00290506	0.128072
NRXN3	4.0781	3.01407	3.54608	0.918381	0.275065	0.336386	0.509944	5.8143	2.5396	0.00290372	0.128072
APBA2	18.0116	21.7683	19.8899	47.5721	45.3856	28.9292	40.629	-2.05793	-1.04119	0.00292598	0.12857
NFXL1	10.5351	17.4146	13.9749	36.9189	16.7789	48.1033	33.9337	-2.42072	-1.27544	0.0029617	0.129369
AC068533.7	10.5351	1.33959	5.93733	2.02044	0	0	0.673479	7.94775	2.99055	0.00296353	0.129369
ARFGAP1	130.159	113.865	122.012	261.738	168.615	216.296	215.55	-1.76901	-0.822943	0.00299027	0.130111
TRA2B	62.8707	94.106	78.4883	160.349	105.35	160.456	142.052	-1.80966	-0.85572	0.00301237	0.130224
C6orf132	16.6522	14.0657	15.3589	34.1638	27.7815	31.9567	31.3007	-2.05882	-1.04182	0.00300682	0.130224
MDGA1	7.13667	12.3912	9.76392	3.30617	3.8509	2.35471	3.17059	3.00707	1.58836	0.00305821	0.131779
SGK3	5.09762	3.01407	4.05585	11.3879	7.97687	15.1374	11.5007	-2.79515	-1.48293	0.00307275	0.13198
SLC43A3	14.6132	14.7355	14.6743	26.8167	32.4576	30.6112	29.9618	-2.00886	-1.00637	0.00316761	0.135618
KIAA0754	14.953	28.1313	21.5422	41.1435	51.162	39.3572	43.8876	-2.03395	-1.02429	0.00319643	0.136415
TMEM39A	45.8786	44.5413	45.2099	106.532	46.761	116.053	89.7821	-1.98509	-0.989206	0.00325172	0.138333
PITHD1	84.6205	116.544	100.582	60.7968	62.9898	46.0849	56.6238	1.76755	0.82175	0.00327548	0.138901
MGAT2	37.3826	59.6116	48.4971	79.7154	69.5913	126.818	92.0415	-1.89288	-0.920582	0.00329835	0.139428
AKIRIN2	96.8548	98.4596	97.6572	64.103	56.9384	47.0941	56.0451	1.71465	0.777915	0.003413	0.14382
SPRY4	5.7773	15.7401	10.7587	27.5514	27.5065	19.8468	24.9682	-2.32282	-1.21588	0.00343437	0.144265
CTD-2547E10.2	16.9921	29.136	23.064	86.8788	43.1851	29.2656	53.1099	-2.30855	-1.20699	0.00344517	0.144265
MOGS	51.316	57.9371	54.6266	91.8381	88.0206	105.625	95.1614	-1.72754	-0.78872	0.00349845	0.146038
ABHD4	287.166	250.168	268.667	182.941	121.579	160.793	155.104	1.72908	0.790003	0.00359337	0.149533
EHD1	56.0738	54.2533	55.1635	110.757	91.8716	82.4147	95.0143	-1.73571	-0.795527	0.00361489	0.149546
STYK1	5.09762	4.01876	4.55819	1.46941	0.275065	0.672773	0.805749	4.84689	2.27706	0.00361606	0.149546
C14orf132	93.1165	59.6116	76.3641	30.6739	43.4602	51.1307	41.7549	1.83991	0.879639	0.00370782	0.152397
ATP10A	12.5741	18.4193	15.4967	39.3067	29.1568	27.2473	31.9036	-2.07949	-1.05623	0.00369764	0.152397
GALK2	10.1952	16.7448	13.47	30.1229	19.2545	36.3297	28.569	-2.11217	-1.07872	0.00374642	0.153511
ETS1	62.191	64.97	63.5805	152.819	70.4165	128.5	117.245	-1.84542	-0.883952	0.00377086	0.15357
LRRC37A4P	5.43746	10.7167	8.07708	17.6329	22.8304	16.1465	18.8699	-2.32749	-1.21877	0.00376115	0.15357
AC005944.2	0	0.334897	0.167448	0.551028	3.8509	9.08243	4.49479	-21.977	-4.45792	0.00379772	0.154194
WNT5A	913.154	852.982	883.068	381.312	442.854	666.382	496.849	1.77873	0.830849	0.0038407	0.155286
FGF11	3.73826	2.67917	3.20871	0.734705	0	0.672773	0.469159	6.0856	2.6054	0.00384787	0.155286
SERPINB2	3.73826	18.7542	11.2462	36.5516	39.3342	14.4646	30.1168	-2.67652	-1.42036	0.00390251	0.157017
CDKN1C	16.3124	10.7167	13.5145	6.97969	4.40103	4.03664	5.13912	2.50438	1.32445	0.00392454	0.157429
ATXN7L3B	147.491	131.279	139.385	78.246	84.9949	95.5338	86.2582	1.633	0.707526	0.00393679	0.157448
RPL23AP7	26.5076	16.4099	21.4588	4.5919	9.35219	13.1191	9.02106	2.42522	1.27811	0.00398431	0.1584
SLC35B1	28.5467	36.5037	32.5252	66.3071	49.2365	66.9409	60.8282	-1.87045	-0.903385	0.00397346	0.1584
CSF1	61.8511	40.1876	51.0194	20.7554	30.2571	28.2565	26.423	1.94559	0.960205	0.00409468	0.158603
CDK15	4.75778	5.69324	5.22551	6.97969	17.054	20.1832	14.739	-2.77222	-1.47104	0.0040241	0.158603
SLC33A1	40.4411	41.8621	41.1516	83.389	41.2597	127.49	84.0464	-2.03926	-1.02805	0.00409627	0.158603
UTRN	69.3276	110.181	89.7543	143.451	186.494	141.955	157.3	-1.75161	-0.808684	0.00408388	0.158603
TRIAP1	55.734	31.8152	43.7746	13.7757	18.9795	29.9384	20.8979	2.11361	1.07971	0.00408383	0.158603
LGALS3	239.248	120.898	180.073	91.8381	110.576	97.2157	99.8766	1.80322	0.850578	0.00406926	0.158603
TELO2	15.9725	26.1219	21.0472	47.2048	39.6093	37.0025	41.2722	-1.97307	-0.980443	0.00408203	0.158603
TRIM65	18.6913	17.0797	17.8855	27.0004	42.635	38.3481	35.9945	-1.99144	-0.99381	0.00400389	0.158603
CENPM	2.03905	5.02345	3.53125	6.79602	16.7789	9.08243	10.8858	-3.04051	-1.60431	0.00406992	0.158603
PCDH9	80.8822	94.4409	87.6616	55.8375	50.6119	47.0941	51.1812	1.68871	0.755918	0.00413657	0.1597
MSH5	5.09762	9.712	7.40481	13.2247	31.3574	13.1191	19.2337	-2.5851	-1.37022	0.00431347	0.16605
TMEM63A	18.3514	18.0844	18.2179	40.2251	31.6324	31.9567	34.6047	-1.93134	-0.9496	0.00436424	0.167042
GSR	203.225	207.971	205.598	107.818	146.334	115.381	123.178	1.67251	0.742015	0.00436221	0.167042
CPA4	23.1092	3.34897	13.2291	0.367352	6.05142	2.01832	2.81236	4.69991	2.23263	0.0043917	0.167594
SOCS3	36.0232	17.0797	26.5515	9.55116	9.07713	17.8285	12.1523	2.20584	1.14133	0.00440376	0.167594
IGFBP4	2322.82	1550.57	1936.69	1045.85	1225.96	1146.74	1139.52	1.69974	0.765312	0.00448171	0.170076
HSPA8	1090.89	885.132	988.011	2193.83	1328.56	1612.3	1711.56	-1.73265	-0.792978	0.00454603	0.172028
SELK	23.7889	35.8339	29.8114	70.5316	35.4833	77.0325	61.0158	-2.0449	-1.03203	0.00461116	0.173549
ARL4D	31.9451	32.1501	32.0476	14.1431	20.0797	18.1649	17.4625	1.88731	0.916334	0.00461221	0.173549
KIAA0232	107.05	117.214	112.132	75.3072	65.7404	57.8585	66.302	1.66878	0.738793	0.0046895	0.174978
RP11-463D19.2	7.13667	3.01407	5.07537	1.83676	0.825194	0	0.887318	4.97718	2.31533	0.00467518	0.174978
HSPB6	248.424	210.985	229.704	145.104	154.861	110.335	136.767	1.67443	0.743673	0.00468239	0.174978
ZNF625-ZNF20	9.51556	7.70262	8.60909	2.75514	1.65039	4.70941	3.03831	2.93817	1.55492	0.0047109	0.175287
CCDC163P	0.679683	0.334897	0.50729	4.95926	0.825194	7.06412	4.28285	-7.93986	-2.98911	0.00475287	0.175876
PGM3	109.429	112.19	110.81	218.575	128.73	240.853	196.052	-1.76878	-0.822756	0.00477009	0.175876
CALHM2	33.6443	17.0797	25.362	10.8369	15.1285	9.08243	11.6826	2.16234	1.1126	0.00477938	0.175876
YPEL1	6.79683	6.36304	6.57993	2.20411	2.75065	0.336386	1.76372	3.40546	1.76785	0.00476012	0.175876
TUBB4B	114.187	257.536	185.861	258.983	470.085	330.331	353.133	-1.89934	-0.925499	0.00483518	0.17744
NANS	42.82	66.3095	54.5648	111.859	78.3934	98.2248	96.159	-1.7642	-0.819015	0.00485515	0.177685
DYRK1B	51.316	35.499	43.4075	24.7963	22.2802	21.1923	22.7563	1.88786	0.916751	0.00488006	0.178109
IVNS1ABP	33.9841	36.8386	35.4114	77.8787	50.6119	62.2315	63.574	-1.80426	-0.851406	0.00500012	0.181388
PRDM5	2.71873	5.02345	3.87109	10.1022	11.2776	9.41882	10.2662	-2.63715	-1.39898	0.00501064	0.181388
FGD4	5.09762	6.36304	5.73033	29.5719	6.32648	13.4555	16.4513	-2.87962	-1.52588	0.00499859	0.181388
ITGB3_1	15.2929	61.2861	38.2895	138.859	88.8458	46.0849	91.2633	-2.38436	-1.2536	0.00503893	0.181919
CORIN	12.914	71.333	42.1235	17.6329	17.6041	13.4555	16.2308	2.58873	1.37225	0.00510759	0.183901
RTEL1	8.83588	27.1266	17.9813	38.3883	41.2597	35.3206	38.3229	-2.1286	-1.08991	0.00517684	0.185893
PPAPDC1B	28.2068	32.1501	30.1785	50.8783	45.3856	76.0233	57.4291	-1.89155	-0.919568	0.00520155	0.186042
RTN4RL2	7.13667	3.01407	5.07537	0.734705	1.10026	2.01832	1.28443	4.16151	2.05711	0.00521462	0.186042
CPM	32.2849	14.4006	23.3427	5.69396	7.70181	15.4738	9.62318	2.45682	1.29679	0.00522277	0.186042
FGF7	33.9841	14.4006	24.1923	8.4491	6.32648	15.4738	10.0831	2.41764	1.2736	0.00525111	0.186554
EPHX1	96.5149	77.0262	86.7706	40.0414	67.1157	40.7028	49.2866	1.76204	0.817248	0.00531094	0.187046
CDC6	11.5546	47.2204	29.3875	73.2868	39.8844	92.5063	68.5591	-2.33011	-1.2204	0.00531693	0.187046
ZNF526	9.17572	15.7401	12.4579	26.082	20.0797	33.975	26.7123	-2.12863	-1.08993	0.00531295	0.187046
FAM83D	2.37889	15.0703	8.72462	10.1022	36.8586	30.9476	25.9695	-2.96082	-1.566	0.00532096	0.187046
C1orf198	8.15619	7.70262	7.92941	27.1841	13.4782	14.4646	18.3756	-2.34416	-1.22907	0.00534286	0.187323
NYNRIN	67.2886	25.787	46.5378	14.3267	28.3316	21.5287	21.3957	2.18063	1.12474	0.00543114	0.189418
LRRC59	234.491	312.793	273.642	557.273	368.862	479.351	468.495	-1.71267	-0.776248	0.00544517	0.189418
RPL9P7	7.81635	0	3.90818	0	0	0	0	113.919	6.83186	0.00542461	0.189418
CEP68	40.1013	22.1032	31.1022	8.81645	20.0797	13.7918	14.2293	2.19948	1.13716	0.00546249	0.189527
KANK1	9.8554	16.4099	13.1327	33.6127	28.8818	18.8376	27.1107	-2.07975	-1.05641	0.0055544	0.191909
PHC1P1	3.73826	0	1.86913	7.53072	5.50129	8.74605	7.25935	-3.83685	-1.93992	0.00555988	0.191909
ADCK3	26.5076	20.7636	23.6356	13.041	10.4525	11.4371	11.6435	1.98954	0.992434	0.00563317	0.19345
TRIM59	4.75778	11.7214	8.23958	10.4695	25.8561	25.9018	20.7425	-2.49372	-1.3183	0.00563349	0.19345
NFATC4	107.39	58.272	82.8309	33.4291	58.5887	42.0483	44.6887	1.85658	0.892651	0.00565016	0.193525
BMS1	57.4332	53.9184	55.6758	98.6341	82.5194	94.5246	91.8927	-1.65895	-0.73027	0.00566689	0.193602
PCDHB14	4.41794	4.01876	4.21835	0.734705	1.10026	1.34555	1.06017	4.1258	2.04467	0.0057185	0.194371
ASF1A	49.9567	46.8855	48.4211	19.1023	29.4319	30.6112	26.3818	1.86623	0.900129	0.00571527	0.194371
CTD-2037K23.2	8.83588	4.68855	6.76221	1.65309	2.75065	2.35471	2.25281	3.0776	1.62181	0.00582739	0.197569
DPYSL3	32.9646	32.1501	32.5573	48.6742	73.7173	57.5221	59.9712	-1.83318	-0.874345	0.0058544	0.197982
EPHA4	14.953	5.35835	10.1557	2.02044	4.12597	4.03664	3.39435	3.04697	1.60738	0.00590733	0.198711
SCFD2	4.41794	5.35835	4.88814	12.1226	10.1774	15.1374	12.4791	-2.50099	-1.3225	0.00591942	0.198711
UPK3BL	7.13667	11.7214	9.42903	2.75514	4.12597	3.70025	3.52712	2.75058	1.45974	0.00592056	0.198711
LSG1	25.4881	33.8246	29.6563	54.9192	51.162	52.1399	52.7404	-1.78553	-0.83635	0.00593892	0.198765
C4B	3.73826	2.00938	2.87382	0.367352	0.550129	0.672773	0.530085	5.45033	2.44634	0.00601147	0.198765
OSBPL3	126.421	105.827	116.124	44.0823	87.4705	65.9317	65.8282	1.76919	0.82309	0.00598605	0.198765
ATP6V0A2	20.7303	23.7777	22.254	45.1843	36.0335	42.7211	41.313	-1.87094	-0.903767	0.00596401	0.198765
OSER1-AS1	7.81635	7.03283	7.42459	2.38779	2.75065	3.02748	2.72197	2.77161	1.47072	0.00600438	0.198765
ADARB1	73.7456	102.813	88.2794	173.758	123.229	146.328	147.772	-1.67624	-0.74523	0.00597729	0.198765
ATXN1	92.7767	73.0075	82.8921	45.1843	48.1363	56.1765	49.8324	1.67844	0.747122	0.0061881	0.203097
SLC2A6	3.05857	6.36304	4.7108	12.6737	11.0026	11.7735	11.8166	-2.517	-1.3317	0.00617885	0.203097
DDB2	84.9603	61.2861	73.1232	21.3064	50.0617	42.3847	37.9176	1.93712	0.953912	0.00618448	0.203097
SOX9	2.03905	0.334897	1.18697	3.8572	10.1774	2.69109	5.57523	-4.60359	-2.20276	0.00621043	0.203331
PPARGC1A	3.39841	2.67917	3.03879	0.551028	0.275065	1.00916	0.611751	4.98974	2.31897	0.0062552	0.203529
UBE2H	407.81	392.499	400.154	237.677	286.067	214.951	246.232	1.62389	0.699458	0.0062622	0.203529
C16orf58	70.687	49.5647	60.1259	108.92	83.8947	110.671	101.162	-1.68313	-0.751143	0.00624224	0.203529
MFGE8	330.326	348.962	339.644	238.228	196.396	192.413	209.012	1.61749	0.693757	0.00630691	0.204485
LINC01021	5.7773	0.669793	3.22355	0	0	0	0	94.0089	6.55473	0.00634753	0.204985
POLR3H	25.4881	21.0985	23.2933	39.8577	41.5347	48.4396	43.2774	-1.82851	-0.870667	0.00635302	0.204985
MSANTD3-TMEFF1	2.03905	3.68386	2.86146	0	0	0	0	83.7601	6.38819	0.0063692	0.205012
ABCC1	482.915	355.995	419.455	219.86	295.969	240.18	252.003	1.66536	0.735836	0.00639751	0.205428
APOE	35.0037	41.1923	38.098	22.0411	16.5039	20.856	19.8003	1.89947	0.925599	0.00641747	0.205575
UHRF1	6.79683	29.136	17.9664	29.5719	55.288	41.3755	42.0785	-2.33613	-1.22412	0.00644616	0.206
CCNG1	181.815	137.977	159.896	67.0418	71.2417	130.854	89.7126	1.78725	0.837739	0.00646425	0.206084
FAM84A	7.81635	6.36304	7.08969	2.20411	3.30077	2.01832	2.50774	2.82057	1.49599	0.00651863	0.206326
CYP3A7	4.41794	0.334897	2.37642	0	0.275065	0.336386	0.203817	11.2588	3.49298	0.00655796	0.206326
KLF10	107.73	66.6444	87.1871	45.919	52.5373	55.5038	51.32	1.70385	0.768795	0.00656731	0.206326
SQLE	51.9957	55.2579	53.6268	84.3073	61.8895	157.092	101.096	-1.88127	-0.911708	0.00651317	0.206326
PMP22	21.41	14.4006	17.9053	6.24499	11.5527	6.05496	7.95088	2.25768	1.17484	0.00649916	0.206326
AMZ2P1	11.2148	5.69324	8.454	3.12249	3.30077	2.35471	2.92599	2.81566	1.49347	0.00658539	0.206326
TSHZ1	67.2886	45.211	56.2498	23.1432	39.0592	27.2473	29.8166	1.89263	0.920389	0.00659538	0.206326
TNFSF9	3.73826	1.67448	2.70637	0.367352	0.825194	0	0.397515	6.08377	2.60496	0.00657934	0.206326
MMP1	0	2.67917	1.33959	10.4695	7.15168	1.68193	6.43438	-4.73296	-2.24274	0.00661939	0.206593
FDPS	55.734	60.2814	58.0077	81.0012	94.0721	116.39	97.1543	-1.66362	-0.734324	0.00670728	0.208698
C5orf30	16.6522	24.4475	20.5498	11.3879	9.62726	7.4005	9.47189	2.10607	1.07455	0.00671808	0.208698
ASS1	45.5387	22.1032	33.821	5.32661	6.87661	25.9018	12.7017	2.68226	1.42345	0.00675531	0.209367
TMEFF1	1.69921	2.67917	2.18919	10.1022	5.50129	5.38218	6.99522	-3.2577	-1.70385	0.00677284	0.209425
PPAP2A	76.1245	32.1501	54.1373	22.2248	27.7815	30.9476	26.9846	2.0118	1.00849	0.00686566	0.210867
MICAL1	72.3862	73.0075	72.6968	136.655	126.255	91.8335	118.248	-1.63368	-0.708123	0.00691057	0.210867
LAMA4	317.072	128.6	222.836	92.5728	98.198	160.456	117.076	1.90498	0.929775	0.00691417	0.210867
UAP1L1	39.7614	54.9231	47.3422	129.675	67.9409	63.577	87.0644	-1.84388	-0.882744	0.00691351	0.210867
GOLGA3	199.147	196.919	198.033	417.312	250.584	319.231	329.042	-1.66312	-0.733895	0.00688927	0.210867
JUNB	67.2886	26.4568	46.8727	29.9392	11.8278	21.8651	21.2107	2.20007	1.13755	0.00685657	0.210867
FAM115C	2.03905	2.34428	2.19166	5.51028	5.77636	10.7644	7.35034	-3.2126	-1.68374	0.00698037	0.211178
CADM1	10.8749	9.37711	10.126	1.28573	1.92545	6.72773	3.31297	3.17194	1.66536	0.00694124	0.211178
STARD13	19.371	28.8011	24.086	44.817	48.9615	40.3664	44.7149	-1.86101	-0.896087	0.00697229	0.211178
SLC19A1	12.914	15.7401	14.3271	28.2861	29.707	23.2107	27.0679	-1.91089	-0.934244	0.00698761	0.211178
VEGFA	282.748	195.915	239.331	174.309	119.653	128.5	140.82	1.69566	0.761843	0.00705316	0.21183
BHLHA15	0	0.669793	0.334897	4.95926	0.550129	5.38218	3.63052	-9.8761	-3.30394	0.00706386	0.21183
CEMP1	4.0781	0	2.03905	6.06131	11.8278	5.71857	7.86922	-3.81648	-1.93224	0.00707262	0.21183
MBP	4.0781	3.34897	3.71353	15.7961	12.928	3.70025	10.8081	-2.92966	-1.55073	0.00705267	0.21183
HIST1H2BC	5.09762	2.00938	3.5535	0.918381	0	1.00916	0.642513	5.18497	2.37434	0.00712333	0.212871
ZNF692	14.953	10.3818	12.6674	24.6126	28.8818	21.5287	25.0077	-1.98404	-0.98844	0.00717078	0.213811
CLIP3	146.472	70.6632	108.567	62.2662	55.563	66.2681	61.3658	1.76909	0.823007	0.00719185	0.213961
CACHD1	2.37889	4.35366	3.36627	11.9389	9.35219	6.05496	9.11537	-2.76283	-1.46615	0.00722043	0.214335
ALDOC	24.8084	21.7683	23.2884	12.1226	13.2031	10.428	11.9179	1.93287	0.950748	0.00726545	0.215193
GOLGA6L9	0	0.334897	0.167448	0	15.6787	0	5.22623	-25.9243	-4.69623	0.00728309	0.215238
THSD1	31.2654	9.712	20.4887	6.97969	10.4525	8.40966	8.61394	2.38182	1.25206	0.00731811	0.215795
RPL23AP82	48.9372	38.5131	43.7251	18.9186	24.7558	28.5928	24.0891	1.84739	0.885486	0.00736659	0.216747
ATF2	29.2264	27.1266	28.1765	57.6743	37.1337	60.5496	51.7859	-1.83746	-0.877716	0.00747068	0.218366
NXPE3	100.933	111.521	106.227	54.0008	78.6685	60.5496	64.4063	1.65548	0.727252	0.00744478	0.218366
MYCBP2	75.1049	110.851	92.9779	181.472	147.71	135.227	154.803	-1.66805	-0.738164	0.00745448	0.218366
RP4-756G23.5	16.6522	8.70731	12.6798	4.95926	3.02571	7.4005	5.12849	2.49825	1.32092	0.00752493	0.219472
VPS13B	43.1599	52.9137	48.0368	83.0216	69.3163	83.7602	78.6994	-1.63934	-0.713118	0.00757951	0.220166
GBF1	138.655	172.807	155.731	339.433	200.522	253.299	264.418	-1.69953	-0.765138	0.00761754	0.220166
TACC2	12.914	17.7495	15.3317	32.1433	33.2828	22.2015	29.2092	-1.92281	-0.943218	0.00766411	0.220166
SLC35F2	5.09762	10.0469	7.57226	25.8983	15.4036	11.7735	17.6918	-2.35549	-1.23603	0.00764923	0.220166
DDIT3	53.0153	65.9746	59.4949	144.186	48.6864	160.456	117.776	-1.9789	-0.984698	0.00764139	0.220166
TMEM120B	24.4686	30.8105	27.6395	57.4906	41.2597	49.4488	49.3997	-1.79746	-0.845962	0.00764081	0.220166
CABIN1	33.9841	53.2486	43.6164	72.7357	86.6453	64.5862	74.6558	-1.71203	-0.775707	0.00764911	0.220166
ALMS1	27.867	31.8152	29.8411	51.4293	58.3137	47.4305	52.3912	-1.75824	-0.814134	0.00770433	0.220846
GMPPA	50.6364	49.2298	49.9331	79.5318	80.3188	84.7694	81.54	-1.62538	-0.700775	0.00777996	0.222537
NPAS2	87.3392	82.0497	84.6945	49.4089	48.1363	60.2132	52.5861	1.63332	0.707807	0.00785587	0.224141
SEC61A1	492.77	600.47	546.62	1005.08	716.818	995.031	905.642	-1.65686	-0.72845	0.0078696	0.224141
FJX1	6.45699	11.0516	8.75429	15.0614	24.2057	17.8285	19.0319	-2.15148	-1.10533	0.007919	0.225068
RP4-798P15.3	1.69921	0	0.849603	3.67352	2.47558	7.4005	4.51654	-5.08749	-2.34695	0.00793853	0.225144
FOSL2	181.815	124.582	153.198	108.369	91.8716	69.9684	90.0696	1.6944	0.760771	0.00797699	0.225563
TOB1	54.0348	41.1923	47.6135	30.6739	20.9049	25.5654	25.7147	1.83044	0.87219	0.00798709	0.225563
COL3A1	3284.91	3271.61	3278.26	914.523	2192.81	2259.17	1788.84	1.83283	0.874072	0.00801261	0.22576
AGPAT4	17.3319	19.424	18.378	44.0823	22.5553	40.7028	35.7801	-1.94964	-0.963206	0.00802784	0.22576
VAMP1	28.8865	27.4615	28.174	11.0206	19.8046	12.1099	14.3117	1.98341	0.987984	0.00823741	0.231167
TGFB2	17.3319	11.3865	14.3592	6.97969	6.05142	5.71857	6.24989	2.23916	1.16296	0.00842976	0.236069
AMIGO3	10.5351	12.7261	11.6306	82.2869	11.8278	12.4463	35.5203	-3.05695	-1.61209	0.0084786	0.23694
TMEM214	118.605	150.703	134.654	245.759	182.368	233.116	220.414	-1.63769	-0.711666	0.00856988	0.23899
TGDS	5.43746	4.35366	4.89556	9.91851	7.15168	22.5379	13.2027	-2.65696	-1.40978	0.00869008	0.241838
INO80	40.4411	42.5319	41.4865	83.7563	55.563	69.2956	69.5383	-1.68387	-0.751784	0.00871102	0.241917
SEC24D	230.752	246.819	238.786	507.13	258.561	467.241	410.977	-1.72136	-0.783547	0.00879836	0.243542
TJP2	16.9921	32.8199	24.906	62.4499	45.6607	36.3297	48.1468	-1.93958	-0.955745	0.00880997	0.243542
SMTN	51.6559	72.6726	62.1642	106.716	123.504	80.7327	103.651	-1.66968	-0.739568	0.00882425	0.243542
ABCC4	28.8865	35.499	32.1928	61.7152	48.1363	58.8676	56.2397	-1.75302	-0.809844	0.00895649	0.246682
MALAT1	68.648	86.7382	77.6931	46.6537	41.8098	54.1582	47.5406	1.64328	0.716579	0.00900219	0.247167
CPXM1	0.339841	0	0.169921	2.93882	6.32648	0.336386	3.20056	-15.9615	-3.99653	0.0090111	0.247167
MTURN	48.9372	34.4944	41.7158	21.1228	26.1311	22.2015	23.1518	1.80855	0.854831	0.00909485	0.248945
hsa-mir-6080	4.41794	2.34428	3.38111	7.7144	9.07713	10.7644	9.1853	-2.61788	-1.3884	0.0091132	0.248945
SDC2	47.238	23.7777	35.5078	21.3064	17.054	16.1465	18.169	1.93834	0.954822	0.00918837	0.250486
INSR	42.1403	46.2157	44.178	24.4289	27.5065	23.2107	25.0487	1.7623	0.817461	0.00923738	0.251309
RAI1	54.3746	54.2533	54.3139	89.4503	88.8458	82.0783	86.7915	-1.60668	-0.684081	0.00935657	0.254035
SLC52A2	49.277	81.7148	65.4959	147.308	89.671	99.234	112.071	-1.71393	-0.777309	0.009459	0.256295
ANKRD49	20.7303	19.424	20.0772	9.55116	9.07713	12.1099	10.2461	1.99459	0.99609	0.00950501	0.25702
LINC01133	7.81635	1.67448	4.74542	0.918381	1.37532	1.00916	1.10095	4.24316	2.08514	0.00956807	0.257163
SOD2	48.9372	53.9184	51.4278	94.9606	47.8612	153.056	98.6259	-1.9152	-0.937494	0.00955674	0.257163
LINC00475	22.4295	5.69324	14.0614	2.02044	6.60155	6.39134	5.00444	2.83811	1.50493	0.00956739	0.257163
ACTR3B	0.679683	3.01407	1.84688	5.51028	6.87661	5.71857	6.03516	-3.1795	-1.6688	0.00962439	0.25815
ENTPD7	15.9725	17.0797	16.5261	45.1843	20.6298	33.3023	33.0388	-2.00758	-1.00546	0.00964342	0.25815
GABARAPL1	294.303	221.032	257.667	193.411	78.9435	157.429	143.261	1.79711	0.845682	0.00967278	0.258418
ATP6V1C2	0	0.334897	0.167448	2.93882	1.92545	3.02748	2.63058	-13.205	-3.72301	0.00969837	0.258584
MYADM	86.3197	65.3048	75.8123	123.798	93.5219	150.028	122.449	-1.61322	-0.689942	0.00976742	0.259907
CYCS	34.324	47.5553	40.9397	69.0622	51.7121	91.8335	70.8693	-1.72616	-0.787569	0.00983517	0.260793
ARMCX4	21.41	22.4381	21.924	34.7148	46.2108	38.0117	39.6458	-1.79248	-0.841955	0.00983978	0.260793
PDE4C	4.41794	0.334897	2.37642	0.551028	0	0	0.183676	9.53371	3.25304	0.00987263	0.261146
CCDC18	6.79683	8.37242	7.58462	11.3879	16.2288	23.2107	16.9425	-2.18839	-1.12987	0.00994851	0.262633
SLC2A12	9.17572	10.3818	9.77876	1.65309	5.22623	4.37302	3.75078	2.72924	1.4485	0.00998494	0.263075
SH3RF1	19.7108	27.7964	23.7536	64.4703	29.982	42.7211	45.7245	-1.93141	-0.949657	0.0100244	0.263595
DUSP8	2.37889	1.00469	1.69179	8.26543	4.6761	3.70025	5.54726	-3.353	-1.74545	0.0100782	0.264489
VSIG10L	28.2068	8.70731	18.4571	7.16337	9.07713	8.07327	8.10459	2.27765	1.18754	0.0101988	0.267127
GRIA1	10.8749	13.7308	12.3028	3.48985	6.60155	7.06412	5.7185	2.26278	1.1781	0.0102281	0.267371
ABLIM1	1.69921	2.00938	1.85429	10.8369	3.57584	4.37302	6.26192	-3.41348	-1.77124	0.0103118	0.268471
PFAS	9.8554	26.7917	18.3236	35.2658	45.6607	29.2656	36.7307	-2.00305	-1.0022	0.0103112	0.268471
KIF16B	11.5546	13.3959	12.4752	22.7758	25.8561	22.2015	23.6111	-1.886	-0.915333	0.0103304	0.268471
IGF2	26.8475	60.9512	43.8993	101.022	120.478	41.3755	87.6252	-1.99702	-0.99785	0.0103547	0.268579
ITPR3	56.4137	113.195	84.8044	235.105	168.064	84.433	162.534	-1.91798	-0.93959	0.0103853	0.268627
MYO5A	76.8041	88.0778	82.441	145.471	138.082	111.344	131.633	-1.60434	-0.681977	0.0103968	0.268627
LRRC8C	21.0702	43.5366	32.3034	44.2659	72.342	64.9226	60.5102	-1.86729	-0.900944	0.0106112	0.27311
BNIP3	175.358	142.666	159.012	110.573	94.0721	93.5154	99.3868	1.59052	0.669495	0.0105995	0.27311
RNF167	91.4173	66.6444	79.0309	46.6537	51.9872	46.4213	48.3541	1.63455	0.708894	0.0106481	0.273532
USMG5	68.648	57.2673	62.9576	29.2045	35.7584	45.0758	36.6796	1.73908	0.798325	0.0106907	0.274102
TMEM159	39.4216	21.0985	30.26	21.1228	11.2776	11.4371	14.6125	2.04176	1.02981	0.010715	0.274196
MLPH	28.2068	20.4287	24.3178	56.9396	38.509	37.0025	44.1504	-1.82991	-0.871771	0.0107514	0.274602
ARHGEF10	45.1989	49.8996	47.5493	91.4707	78.3934	61.5587	77.1409	-1.63368	-0.708125	0.0108178	0.275247
TXNRD1	2226.3	2218.02	2222.16	1597.61	1368.45	1247.32	1404.46	1.58105	0.660879	0.0108163	0.275247
CTDSP2	470.001	466.511	468.256	304.902	308.347	280.21	297.82	1.56702	0.648026	0.0108597	0.275787
PGRMC2	201.526	115.874	158.7	81.5522	79.4936	120.426	93.8241	1.69443	0.760799	0.0108983	0.276241
CENPA	1.01952	7.70262	4.36107	6.61234	17.8792	13.7918	12.7611	-2.89597	-1.53404	0.0109685	0.277095
AP3D1	196.768	248.828	222.798	439.721	301.471	331.677	357.623	-1.60674	-0.68414	0.0109734	0.277095
ZNRD1	3.05857	5.02345	4.04101	9.18381	9.35219	11.1008	9.87892	-2.38745	-1.25547	0.0110099	0.277491
PROS1	18.0116	8.03752	13.0246	4.77558	5.77636	6.72773	5.75989	2.28772	1.19391	0.0111053	0.279369
TTC7A	17.3319	16.075	16.7035	42.6129	20.6298	34.6478	32.6302	-1.96058	-0.971281	0.0111816	0.28076
FLI1	1.01952	3.34897	2.18425	6.97969	6.60155	5.71857	6.43327	-2.95646	-1.56387	0.0112033	0.280777
PHLDA2	17.6718	27.1266	22.3992	55.2865	36.5836	32.9659	41.612	-1.86904	-0.9023	0.0112612	0.281699
LAMA1	55.734	115.874	85.8041	164.757	135.332	138.255	146.115	-1.70338	-0.768398	0.011326	0.282791
ARSJ	20.3905	57.9371	39.1638	65.9397	86.6453	64.2498	72.2783	-1.84416	-0.88296	0.0114534	0.2828
BOP1	26.8475	23.4428	25.1451	53.8171	42.635	36.6661	44.3727	-1.78569	-0.836485	0.0114003	0.2828
BLOC1S2	65.5894	46.8855	56.2375	24.2452	32.7327	40.03	32.336	1.75664	0.812822	0.0113712	0.2828
SPRY2	12.2343	27.1266	19.6805	35.0821	36.5836	39.6936	37.1198	-1.87933	-0.910219	0.0114223	0.2828
DLGAP1-AS1	14.6132	12.3912	13.5022	3.8572	9.07713	5.38218	6.1055	2.25453	1.17283	0.0114278	0.2828
ACSS1	1.35937	2.00938	1.68437	5.14293	3.02571	9.41882	5.86249	-3.36479	-1.75052	0.0114327	0.2828
PMS2P2	2.03905	2.00938	2.02421	0.367352	0	0.672773	0.346708	5.61765	2.48997	0.0116573	0.284682
CAV1	705.171	542.867	624.019	227.024	497.592	367.334	363.983	1.71517	0.77835	0.0116214	0.284682
CDK17	85.64	89.4174	87.5287	57.6743	58.3137	45.7486	53.9122	1.59836	0.676594	0.0116575	0.284682
CDR2	46.8981	49.8996	48.3989	114.43	46.2108	100.243	86.9614	-1.79774	-0.84618	0.0116153	0.284682
FAM129C	2.03905	2.00938	2.02421	0.367352	0	0.672773	0.346708	5.61765	2.48997	0.0115642	0.284682
MPV17L2	5.09762	12.0563	8.57695	18.735	15.6787	20.1832	18.1989	-2.10978	-1.07709	0.0116214	0.284682
PJA1	20.0506	15.7401	17.8954	31.9596	32.4576	33.975	32.7974	-1.8232	-0.866472	0.0117613	0.286694
SPAG9	104.671	149.364	127.018	266.514	169.44	188.376	208.11	-1.64045	-0.714088	0.0118108	0.287374
C12orf5	37.3826	23.7777	30.5801	10.6532	17.054	20.5196	16.0756	1.92957	0.948278	0.0118582	0.288004
VPS13A	38.0622	67.6491	52.8557	70.5316	90.2212	109.998	90.2504	-1.70226	-0.767454	0.011937	0.28939
ELK3	54.3746	65.9746	60.1746	96.7973	84.9949	104.953	95.5816	-1.58406	-0.663626	0.012102	0.29286
SERINC1	399.314	358.005	378.659	230.697	206.023	287.274	241.332	1.57162	0.652256	0.0121251	0.292889
TSPYL2	102.632	88.0778	95.355	261.738	92.9718	165.839	173.516	-1.82106	-0.864781	0.0121501	0.292961
RP11-632K20.7	51.9957	62.9606	57.4782	28.4698	42.635	28.5928	33.2325	1.73342	0.793618	0.0121737	0.293002
FKBP14	44.5192	62.2908	53.405	77.5113	68.4911	131.191	92.3977	-1.72525	-0.786806	0.0122376	0.293859
NEDD4L	1.69921	8.03752	4.86836	30.3066	12.928	3.36386	15.5328	-3.18944	-1.6733	0.0122583	0.293859
SCARF2	40.4411	56.2626	48.3519	124.532	54.7378	76.6961	85.3221	-1.76805	-0.822156	0.0122753	0.293859
SGIP1	5.09762	3.68386	4.39074	9.00013	8.80206	13.7918	10.5313	-2.31807	-1.21292	0.0123403	0.294783
HERC2P2	146.472	151.708	149.09	222.432	259.936	218.651	233.673	-1.56649	-0.647534	0.012358	0.294783
KM-PA-2	4.0781	8.70731	6.3927	3.8572	0	0	1.28573	4.70377	2.23382	0.0124165	0.295124
ZNF70	5.7773	8.03752	6.90741	13.041	13.4782	18.5013	15.0068	-2.10221	-1.07191	0.0124016	0.295124
NFKBIZ	25.1483	26.7917	25.97	76.4093	31.3574	41.0391	49.6019	-1.91729	-0.93907	0.0124437	0.295244
ISY1	22.0897	21.7683	21.929	38.2046	37.9589	38.6844	38.2827	-1.74327	-0.801794	0.0124712	0.295372
SLC39A14	115.886	258.875	187.381	466.905	176.866	423.511	355.761	-1.89856	-0.924904	0.0125222	0.295813
NPIPA3	17.6718	13.3959	15.5338	3.30617	0	10.7644	4.69018	3.31847	1.73052	0.0125341	0.295813
ACTN1	281.049	396.853	338.951	658.479	578.186	417.792	551.486	-1.62789	-0.703005	0.0125913	0.296639
RASD1	9.51556	5.35835	7.43695	3.12249	3.02571	2.01832	2.72217	2.61494	1.38678	0.0126142	0.296655
AVPI1	59.1324	38.1782	48.6553	38.572	17.6041	18.5013	24.8925	1.93628	0.953284	0.0126985	0.298113
SCD5	11.2148	7.36773	9.29125	3.67352	1.65039	5.38218	3.5687	2.63414	1.39733	0.0127313	0.298358
RHOBTB1	10.8749	12.7261	11.8005	17.2656	25.3059	26.2381	22.9365	-1.90618	-0.930687	0.0127633	0.298585
SAMD11	49.6168	26.1219	37.8694	29.7555	11.0026	12.4463	17.7348	2.11363	1.07972	0.0128324	0.299155
IL21R	0.679683	0	0.339841	3.12249	1.37532	3.70025	2.73269	-7.43141	-2.89364	0.012811	0.299155
OCIAD2	4.41794	7.70262	6.06028	16.5309	16.5039	8.07327	13.7027	-2.28212	-1.19037	0.0129059	0.300344
PDXDC2P_1	24.4686	19.7589	22.1137	56.9396	34.3831	31.2839	40.8689	-1.86216	-0.896977	0.0129316	0.300419
ERLEC1	57.4332	70.3283	63.8807	94.2259	85.8201	130.182	103.409	-1.61289	-0.689647	0.0131152	0.301379
SLC12A8	20.7303	25.787	23.2587	9.36748	14.8535	14.1282	12.7831	1.86952	0.902665	0.0130957	0.301379
SDHAP2	1.69921	4.01876	2.85898	0	1.37532	0	0.458441	6.06127	2.59962	0.013054	0.301379
DUSP1	336.443	177.16	256.802	165.125	126.805	169.875	153.935	1.66797	0.738096	0.0131554	0.301379
MCUR1	19.371	37.5084	28.4397	55.1028	41.2597	58.1949	51.5191	-1.8093	-0.855431	0.0130259	0.301379
DHCR7	36.0232	39.5178	37.7705	61.5315	37.6838	113.026	70.7471	-1.86864	-0.901991	0.0131986	0.301379
FOXRED1	16.9921	23.1079	20.05	38.3883	34.9332	31.2839	34.8685	-1.76743	-0.821651	0.0131439	0.301379
TNFRSF1A	269.834	216.008	242.921	155.574	176.041	126.481	152.699	1.58794	0.667156	0.0131766	0.301379
MTHFD1	25.1483	51.909	38.5286	76.0419	73.9924	50.458	66.8307	-1.737	-0.796598	0.0131444	0.301379
ZHX3	44.1794	64.6351	54.4072	89.8176	92.1466	79.0508	87.005	-1.60196	-0.679837	0.0131512	0.301379
MAN1A2	53.0153	78.3658	65.6905	98.8178	89.396	131.527	106.58	-1.6182	-0.69439	0.0132836	0.302803
TBL2	50.9762	40.5225	45.7494	80.0828	55.288	90.488	75.2862	-1.64397	-0.717184	0.0134053	0.304573
RP11-685N10.1	1.35937	4.01876	2.68906	0.183676	0.825194	0.672773	0.560548	5.02902	2.33028	0.0134069	0.304573
PXK	73.4057	102.143	87.7746	59.8784	32.7327	62.2315	51.6142	1.69975	0.765324	0.0134673	0.305198
MCAM	28.8865	73.3424	51.1144	113.879	129.555	52.4763	98.637	-1.93056	-0.949016	0.0134801	0.305198
ENO2	125.741	91.0919	108.417	79.7154	71.2417	33.3023	61.4198	1.75869	0.814505	0.0136795	0.308667
GTSE1	3.05857	33.1548	18.1067	29.9392	63.815	44.403	46.0524	-2.53856	-1.34401	0.0136684	0.308667
CDCA7	1.35937	3.68386	2.52161	8.08175	6.60155	6.05496	6.91275	-2.7927	-1.48166	0.0137877	0.309089
AKAP9	84.2807	82.0497	83.1652	135.92	111.126	135.564	127.537	-1.53561	-0.618814	0.0137776	0.309089
DCN	1066.76	879.104	972.933	478.109	646.952	701.366	608.809	1.59934	0.677479	0.0137244	0.309089
LIG3	15.6327	19.7589	17.6958	27.1841	34.9332	36.6661	32.9278	-1.82867	-0.870794	0.0137908	0.309089
ZNF286A_1	49.277	34.4944	41.8857	21.3064	25.8561	25.5654	24.2426	1.74376	0.802199	0.0138773	0.310508
SH3RF3	18.3514	13.7308	16.0411	28.8372	22.5553	39.3572	30.2499	-1.87256	-0.905015	0.0139366	0.311313
CTD-2368P22.1	23.7889	10.7167	17.2528	9.00013	7.70181	7.73689	8.14628	2.09762	1.06875	0.0139708	0.311556
GPATCH4	15.2929	17.0797	16.1863	30.3066	31.6324	23.5471	28.4953	-1.78851	-0.838761	0.0141452	0.311802
PRRC1	75.7846	67.3142	71.5494	120.308	81.144	143.973	115.142	-1.60757	-0.684881	0.0140561	0.311802
DENND3	21.41	22.773	22.0915	45.7354	37.4088	31.9567	38.3669	-1.7624	-0.817544	0.014131	0.311802
SLC44A1	123.702	137.643	130.672	63.5519	75.9178	109.326	82.9318	1.58362	0.663225	0.014027	0.311802
IGF1R	185.893	146.685	166.289	116.451	105.075	96.2065	105.911	1.56206	0.643452	0.0140917	0.311802
PAQR4	2.03905	6.02814	4.03359	15.4288	9.62726	5.71857	10.2582	-2.56229	-1.35743	0.0141119	0.311802
APOBEC3C	103.991	49.2298	76.6106	20.0207	59.689	38.6844	39.4647	1.94469	0.959542	0.0140419	0.311802
ATAD3B	29.2264	40.1876	34.707	88.5319	50.0617	45.7486	61.4474	-1.7777	-0.830008	0.0144194	0.315244
UBA5	28.2068	24.4475	26.3271	40.7761	32.1825	76.3597	49.7728	-1.8822	-0.912421	0.0143799	0.315244
MCC	21.41	7.70262	14.5563	3.8572	6.32648	8.40966	6.19778	2.38267	1.25258	0.0143614	0.315244
ULBP1	13.2538	12.7261	12.9899	7.34705	6.05142	4.03664	5.8117	2.11195	1.07857	0.0144072	0.315244
B3GNTL1	1.01952	1.33959	1.17956	4.04087	6.32648	2.69109	4.35282	-3.6439	-1.86548	0.0143995	0.315244
AURKB	2.03905	23.1079	12.5735	20.5717	48.9615	28.9292	32.8208	-2.60343	-1.38041	0.0144699	0.315831
GREM1	6266.67	4869.4	5568.04	3072.35	3641.85	3878.2	3530.8	1.5772	0.657364	0.0145232	0.316478
LPPR3	2.71873	4.01876	3.36875	1.10206	0.550129	1.00916	0.887115	3.5985	1.8474	0.0145707	0.316995
IGFBP7	259.979	287.006	273.493	191.758	167.239	170.548	176.515	1.54087	0.623747	0.0146582	0.31838
ZNF436	29.2264	21.0985	25.1624	13.4084	14.3034	14.4646	14.0588	1.80036	0.848289	0.0147483	0.319196
AC016773.1	0	0.669793	0.334897	1.65309	3.8509	2.69109	2.73169	-7.14256	-2.83644	0.0147604	0.319196
TUBA1C	141.374	302.077	221.725	272.024	509.695	381.126	387.615	-1.74756	-0.805338	0.0147674	0.319196
KCNK6	21.0702	10.0469	15.5585	29.0208	22.0052	39.6936	30.2399	-1.93638	-0.953365	0.0148107	0.319614
SATB1	32.2849	14.7355	23.5102	11.0206	11.2776	14.1282	12.1421	1.94546	0.960112	0.0149551	0.320846
SNX30	66.2691	82.0497	74.1594	58.0417	40.7095	37.3389	45.3634	1.61893	0.695042	0.0149879	0.320846
ATG16L2	10.8749	19.424	15.1495	31.9596	34.6581	18.8376	28.4851	-1.88775	-0.91667	0.0149266	0.320846
PIF1	2.71873	13.3959	8.0573	9.00013	37.9589	16.8193	21.2595	-2.62582	-1.39277	0.0149082	0.320846
SPECC1	0.339841	7.70262	4.02123	17.8166	9.62726	8.07327	11.839	-2.93504	-1.55338	0.0149673	0.320846
ADH1B	8.49603	1.00469	4.75036	0.183676	0.275065	2.35471	0.937815	5.19543	2.37724	0.0151162	0.32102
EPHB6	12.914	1.67448	7.29423	2.38779	3.02571	1.00916	2.14089	3.32594	1.73376	0.0150949	0.32102
RP11-325K4.3	0	2.34428	1.17214	8.4491	1.10026	6.05496	5.20144	-4.34658	-2.11988	0.0150792	0.32102
C1QL1	4.0781	3.01407	3.54608	0.918381	1.37532	0.672773	0.988825	3.47202	1.79578	0.0150645	0.32102
DOT1L	57.4332	61.9559	59.6945	122.512	81.9692	81.7419	95.4077	-1.60573	-0.683229	0.0150447	0.32102
FAM98A	45.5387	48.8949	47.2168	69.4296	62.1646	98.8976	76.8306	-1.61926	-0.695332	0.0153259	0.323418
IP6K2	119.284	84.394	101.839	67.4091	65.1903	59.8768	64.1587	1.58152	0.661311	0.0153259	0.323418
DKK1	8.83588	11.3865	10.1112	25.1636	28.8818	9.41882	21.1547	-2.10083	-1.07096	0.0153139	0.323418
PIDD	46.2184	22.1032	34.1608	18.3676	17.8792	19.174	18.4736	1.84828	0.886181	0.0153076	0.323418
WDR63	4.0781	0.334897	2.2065	0	0.550129	0.336386	0.295505	7.34353	2.87647	0.0155014	0.326606
MINA	13.5937	19.0891	16.3414	29.9392	23.6555	36.6661	30.087	-1.8281	-0.870342	0.0155445	0.326998
CEP128	6.79683	15.0703	10.9336	15.9798	27.2314	20.856	21.3557	-1.93883	-0.95519	0.0155941	0.327525
LIMS3_2	3.05857	3.68386	3.37122	13.7757	5.77636	6.39134	8.6478	-2.60588	-1.38177	0.0158789	0.328677
UGGT1	126.761	208.641	167.701	258.065	248.108	295.011	267.061	-1.59144	-0.67033	0.0158647	0.328677
TNFRSF21	98.8938	28.1313	63.5126	17.2656	28.0566	45.0758	30.1326	2.11331	1.0795	0.0158661	0.328677
TPST1	92.4369	70.9981	81.7175	47.2048	47.5862	61.5587	52.1165	1.57935	0.659333	0.0158583	0.328677
TNFRSF10B	459.805	406.23	433.018	281.208	252.234	308.803	280.748	1.54411	0.626772	0.0157376	0.328677
FOCAD	34.324	53.5835	43.9537	61.7152	72.617	81.7419	72.0247	-1.63045	-0.705273	0.0157767	0.328677
ITPR2	9.51556	20.7636	15.1396	29.0208	21.455	36.3297	28.9352	-1.90319	-0.928417	0.0157789	0.328677
KITLG	353.095	300.067	326.581	206.268	174.666	252.29	211.075	1.54921	0.631536	0.015895	0.328677
LIPG	0.339841	0	0.169921	1.83676	1.10026	4.70941	2.54881	-12.2709	-3.61717	0.0158003	0.328677
ZNF765	26.8475	17.4146	22.131	11.0206	12.3779	12.4463	11.9483	1.86674	0.90052	0.0157561	0.328677
CLCN6	47.238	45.5459	46.3919	91.8381	52.2623	82.4147	75.505	-1.63016	-0.705012	0.015984	0.329498
SMCO4	2.03905	1.67448	1.85677	6.79602	3.57584	5.71857	5.36348	-2.93573	-1.55372	0.0159739	0.329498
NBL1	73.0659	70.6632	71.8645	49.4089	46.2108	41.7119	45.7772	1.54745	0.629893	0.0160493	0.329824
C2orf68	33.9841	32.8199	33.402	15.2451	22.5553	20.5196	19.44	1.76079	0.816224	0.0160272	0.329824
MAP2K3	31.2654	34.4944	32.8799	108.369	45.3856	36.3297	63.3614	-1.93251	-0.950477	0.0161234	0.33084
WBP1L	95.4954	73.0075	84.2514	53.4498	60.2391	46.4213	53.3701	1.57262	0.653171	0.0161545	0.330969
CNDP2	50.9762	42.8668	46.9215	63.1846	85.5451	74.6778	74.4691	-1.57874	-0.658769	0.0161836	0.331057
RNASEH1	19.7108	26.7917	23.2513	39.674	35.2083	47.4305	40.7709	-1.73884	-0.798122	0.0163021	0.33145
ASB3	4.0781	6.36304	5.22057	0.183676	3.30077	0	1.16148	4.42184	2.14465	0.0162626	0.33145
DCUN1D1	41.1208	47.8902	44.5055	19.6533	18.9795	36.3297	24.9875	1.80042	0.848337	0.0162876	0.33145
SSBP2	50.2965	35.499	42.8978	23.3269	20.0797	30.6112	24.6726	1.75179	0.80883	0.0162405	0.33145
XPO1	352.415	357.335	354.875	181.839	210.424	292.32	228.195	1.55846	0.640123	0.016484	0.332519
FNIP2	10.8749	14.4006	12.6377	37.6536	18.7044	18.1649	24.841	-1.98222	-0.987115	0.0164828	0.332519
ELL2	233.131	162.425	197.778	142.533	99.0232	132.873	124.81	1.58291	0.662581	0.0164005	0.332519
BDNF	22.0897	19.7589	20.9243	50.6946	37.4088	24.8926	37.6653	-1.81489	-0.859878	0.016452	0.332519
LYRM1	21.7498	15.0703	18.4101	6.61234	8.80206	13.1191	9.51116	1.98989	0.99269	0.016504	0.332519
ARHGEF1	80.5424	87.408	83.9752	139.594	129.005	111.344	126.648	-1.51886	-0.602993	0.0164248	0.332519
GPR68	1.35937	1.00469	1.18203	3.67352	6.05142	3.02748	4.25081	-3.51471	-1.81341	0.0165313	0.332568
RPS27L	174.339	131.279	152.809	72.5521	97.3728	118.408	96.111	1.59599	0.67445	0.016678	0.335016
C4orf3	65.2495	46.5506	55.9001	26.4494	31.9075	40.7028	33.0199	1.71014	0.774112	0.0167445	0.335612
MKLN1-AS	4.41794	2.34428	3.38111	0.734705	1.37532	0.672773	0.9276	3.59776	1.8471	0.016758	0.335612
HECTD2	22.7694	23.1079	22.9386	10.8369	5.77636	17.8285	11.4806	2.01569	1.01127	0.0168229	0.336408
HMCN1	1.69921	2.34428	2.02174	3.8572	9.62726	5.0458	6.17675	-2.98165	-1.57611	0.016887	0.337184
SLC20A1	53.3551	74.3471	63.8511	113.512	100.123	87.1241	100.253	-1.57589	-0.656163	0.0169433	0.337342
TNFRSF19	213.76	142.331	178.046	60.7968	103.974	145.992	103.588	1.7224	0.784419	0.0169454	0.337342
PCDHB13	3.05857	2.34428	2.70142	0.551028	0.550129	1.00916	0.703439	3.91377	1.96856	0.0170188	0.337654
ZNF316	20.7303	16.4099	18.5701	43.5312	23.9306	32.9659	33.4759	-1.81393	-0.859116	0.0170444	0.337654
ZNF117	27.1873	21.4334	24.3103	7.7144	15.4036	16.8193	13.3124	1.86015	0.895416	0.0171057	0.337654
TMEM119	20.7303	6.69793	13.7141	2.20411	6.32648	8.07327	5.53462	2.51301	1.32942	0.0171127	0.337654
KLHDC4	8.83588	10.0469	9.44139	22.2248	22.2802	11.4371	18.6474	-1.99753	-0.998217	0.0170986	0.337654
ZNF600	10.5351	7.03283	8.78396	4.04087	2.47558	4.37302	3.62983	2.39008	1.25706	0.017036	0.337654
ASAP3	46.8981	27.7964	37.3473	11.7553	24.2057	23.2107	19.7239	1.90943	0.933139	0.0171641	0.33767
NPIPA2	0	0	0	11.3879	6.87661	2.69109	6.98521	-203.874	-7.67153	0.0171513	0.33767
MATN2	15.9725	12.3912	14.1819	5.14293	9.90232	4.70941	6.58489	2.15982	1.11091	0.0172491	0.338844
NBPF1	84.2807	77.3611	80.8209	121.226	111.126	129.172	120.508	-1.48751	-0.5729	0.0173259	0.338858
SLC30A1	74.0854	62.9606	68.523	50.3273	19.5296	43.3939	37.7502	1.81053	0.856413	0.0173227	0.338858
CYBRD1	206.624	191.226	198.925	108.553	122.404	157.429	129.462	1.54378	0.626472	0.0173035	0.338858
GALNT15	26.8475	7.36773	17.1076	5.69396	4.40103	11.4371	7.17738	2.39968	1.26284	0.0173905	0.339624
IBTK	75.7846	69.6585	72.7216	104.512	72.8921	198.468	125.291	-1.72032	-0.782675	0.0174413	0.340118
RP11-108M9.4	3.05857	1.67448	2.36653	0.551028	0.825194	0	0.458741	4.50125	2.17033	0.0176174	0.341173
SCD	312.314	361.353	336.834	504.375	369.137	799.254	557.588	-1.65474	-0.726605	0.0175812	0.341173
NUDT4	129.48	129.27	129.375	90.185	79.4936	90.8243	86.8343	1.48674	0.572154	0.0176231	0.341173
LRRK1	19.7108	21.4334	20.5721	40.4087	34.3831	29.602	34.7979	-1.72224	-0.784288	0.0175506	0.341173
GRIN2C	4.0781	0.669793	2.37394	0.367352	0.550129	0.336386	0.417956	5.33051	2.41427	0.0175788	0.341173
DUSP7	18.3514	16.7448	17.5481	40.0414	22.0052	34.3114	32.1193	-1.83819	-0.878289	0.0177047	0.341762
CSPG4P10	5.7773	1.33959	3.55844	1.46941	0	0.672773	0.714061	4.52525	2.178	0.0176854	0.341762
HKDC1	10.1952	12.0563	11.1258	4.04087	7.97687	1.68193	4.56656	2.40226	1.26439	0.0179292	0.344106
LACC1	38.7419	39.8527	39.2973	16.8982	17.3291	32.6295	22.2856	1.78631	0.836981	0.0178638	0.344106
SPATA7	14.6132	9.37711	11.9951	3.48985	6.60155	7.06412	5.7185	2.17231	1.11923	0.017911	0.344106
TBL3	23.7889	28.1313	25.9601	40.7761	48.6864	45.0758	44.8461	-1.70573	-0.770391	0.0179055	0.344106
DPH2	12.5741	14.7355	13.6548	30.4902	19.8046	24.2198	24.8382	-1.83963	-0.879414	0.0179802	0.344591
ATP1A2	10.1952	2.67917	6.43721	1.28573	3.57584	1.34555	2.06904	3.10048	1.63249	0.0181615	0.345368
F11R	8.15619	2.00938	5.08279	0	2.47558	1.00916	1.16158	4.39402	2.13554	0.0180765	0.345368
PIGC	23.1092	17.0797	20.0945	9.18381	12.3779	11.1008	10.8875	1.88481	0.914419	0.0180768	0.345368
EIF4EBP2	144.093	130.945	137.519	85.2257	93.2469	99.234	92.5689	1.5023	0.587173	0.0181453	0.345368
ATP2B1	99.9134	101.139	100.526	149.512	114.702	235.471	166.562	-1.65453	-0.726418	0.0181026	0.345368
ZFP36L1	317.752	264.568	291.16	140.512	223.077	194.095	185.895	1.56893	0.649776	0.0182276	0.345368
SHMT1	1.35937	5.69324	3.5263	9.00013	12.1028	6.05496	9.05264	-2.55918	-1.35568	0.0181802	0.345368
TMEM50B	22.0897	27.7964	24.9431	32.1433	46.761	52.8127	43.9057	-1.74305	-0.801616	0.0182022	0.345368
WRN	16.6522	26.1219	21.3871	38.021	31.6324	42.7211	37.4582	-1.74386	-0.802287	0.0182812	0.345877
BUB1B	3.73826	36.5037	20.121	20.9391	74.8176	62.5679	52.7748	-2.61746	-1.38817	0.0183062	0.345877
CICP14	12.914	12.0563	12.4851	23.8779	23.1054	19.174	22.0524	-1.79632	-0.845044	0.0183349	0.345928
C17orf51	53.6949	95.4455	74.5702	138.675	78.6685	153.056	123.467	-1.65502	-0.726847	0.0183696	0.346095
PCBP1-AS1	19.7108	15.0703	17.3906	7.34705	6.87661	13.1191	9.11424	1.96114	0.971691	0.0184031	0.346164
C17orf103	35.6833	25.787	30.7352	22.7758	15.1285	12.1099	16.6714	1.80727	0.853813	0.018451	0.346164
JMJD6	28.8865	25.787	27.3368	65.3887	40.1594	37.6753	47.7411	-1.75912	-0.814854	0.0184283	0.346164
RELL1	10.8749	10.0469	10.4609	4.95926	5.77636	3.02748	4.5877	2.20361	1.13987	0.0184958	0.34649
TDP2	269.494	238.446	253.97	143.635	133.406	209.569	162.203	1.5692	0.650027	0.0185203	0.34649
METTL7A	16.9921	15.7401	16.3661	2.38779	8.527	10.7644	7.22639	2.30824	1.20679	0.0185968	0.347318
TNFRSF12A	92.4369	138.647	115.542	240.616	202.723	125.472	189.603	-1.64292	-0.716259	0.0186166	0.347318
CREB5	90.7376	35.499	63.1183	29.2045	25.581	47.0941	33.9599	1.86274	0.897429	0.0190249	0.354441
ANKRD30BL	0.679683	1.67448	1.17708	12.49	1.65039	1.34555	5.16197	-4.35298	-2.122	0.0193025	0.357916
OXSR1	71.0268	88.7476	79.8872	140.145	111.676	108.316	120.046	-1.50911	-0.5937	0.0193186	0.357916
RP11-144G6.12	3.39841	2.67917	3.03879	10.4695	5.22623	7.4005	7.69876	-2.57966	-1.36718	0.0193069	0.357916
NXN	18.6913	12.0563	15.3738	4.5919	7.97687	10.0916	7.55346	2.09447	1.06659	0.0193173	0.357916
PDE7B	21.0702	10.3818	15.726	3.67352	6.32648	11.4371	7.14572	2.24332	1.16564	0.0194326	0.358278
PRKG1	25.4881	33.8246	29.6563	58.2253	36.0335	58.1949	50.8179	-1.71389	-0.777278	0.0194046	0.358278
ATP2A2	258.279	400.202	329.24	639.744	390.867	548.31	526.307	-1.59883	-0.677015	0.0194454	0.358278
TMEM104	23.7889	41.1923	32.4906	62.6336	41.8098	63.9134	56.1189	-1.72635	-0.787723	0.019369	0.358278
B3GALT1	0	0.334897	0.167448	4.5919	0.825194	1.34555	2.25421	-11.657	-3.54313	0.0195784	0.359918
LXN	9.17572	6.02814	7.60193	2.57147	4.6761	1.68193	2.9765	2.52112	1.33406	0.0195883	0.359918
STX1A	7.13667	16.4099	11.7733	36.5516	26.1311	11.7735	24.8187	-2.11586	-1.08124	0.0196871	0.361236
RP11-244H3.4	0	0	0	5.87764	2.75065	10.428	6.35209	-180.868	-7.49879	0.0198115	0.361645
UBE2J1	74.0854	85.0637	79.5746	147.492	78.1183	161.129	128.913	-1.61956	-0.695602	0.0199221	0.361645
FAM26E	52.3356	56.5975	54.4666	13.041	38.234	35.3206	28.8652	1.89748	0.924088	0.0198385	0.361645
NUP188	54.0348	103.483	78.7589	120.675	151.836	107.307	126.606	-1.60735	-0.684681	0.0199178	0.361645
CHORDC1	37.0427	50.9043	43.9735	96.981	45.1106	79.7236	73.9384	-1.68334	-0.751324	0.0197621	0.361645
SIK2	207.303	169.458	188.38	124.532	116.352	130.182	123.689	1.52408	0.607942	0.019926	0.361645
RSRC2	61.1714	55.2579	58.2147	173.023	67.3908	69.2956	103.236	-1.77672	-0.829214	0.0198493	0.361645
TTC28-AS1	22.7694	18.4193	20.5943	10.2859	11.8278	12.4463	11.52	1.81955	0.863583	0.0198789	0.361645
PHACTR2	14.953	14.7355	14.8442	29.9392	21.7301	25.5654	25.7449	-1.75997	-0.815553	0.0200017	0.361652
GOLGA8B	87.6791	103.483	95.5811	134.084	191.445	124.127	149.885	-1.56788	-0.648811	0.0199895	0.361652
ZNF598	54.3746	56.5975	55.4861	102.491	72.617	82.7511	85.9531	-1.55744	-0.639179	0.0200075	0.361652
LPCAT1	36.0232	38.1782	37.1007	58.0417	61.3394	58.8676	59.4162	-1.59699	-0.675357	0.0200374	0.361702
TRNP1	137.976	159.076	148.526	113.144	99.0232	71.3139	94.4939	1.56377	0.645026	0.020181	0.361849
HPCAL1	13.2538	18.7542	16.004	26.2657	39.3342	21.8651	29.155	-1.82126	-0.864934	0.0201734	0.361849
ST7-OT4	1.01952	2.67917	1.84935	0.367352	0.275065	0.336386	0.326268	5.15765	2.36671	0.0201425	0.361849
FNDC3A	88.3588	106.162	97.2605	182.207	106.725	174.585	154.505	-1.58908	-0.668192	0.0200898	0.361849
CEP170B	117.245	94.4409	105.843	198.738	143.859	151.71	164.769	-1.56114	-0.642601	0.0201392	0.361849
PEPD	31.9451	46.2157	39.0804	69.0622	69.8664	50.458	63.1289	-1.6217	-0.697504	0.0202415	0.361963
SSC5D	20.0506	9.04221	14.5464	7.7144	6.60155	6.05496	6.7903	2.11136	1.07817	0.0202335	0.361963
MAP9	7.13667	4.35366	5.74516	7.89807	12.3779	18.5013	12.9257	-2.20515	-1.14088	0.020276	0.362094
PSTPIP2	14.953	5.69324	10.3231	3.48985	4.40103	5.0458	4.31223	2.42009	1.27506	0.0203651	0.363201
CDC20	7.47651	44.5413	26.0089	24.7963	87.7456	71.3139	61.2853	-2.35204	-1.23391	0.0204895	0.363804
MVD	25.1483	25.4521	25.3002	40.9598	34.108	55.8401	43.636	-1.71244	-0.776055	0.0204351	0.363804
TEF	35.6833	12.0563	23.8698	15.0614	9.90232	10.428	11.7972	2.00644	1.00464	0.0205079	0.363804
IRAK1	75.7846	103.148	89.4664	151.349	145.784	116.39	137.841	-1.54446	-0.627099	0.0204884	0.363804
PRUNE2	30.5857	15.0703	22.828	4.04087	4.40103	19.8468	9.42957	2.44346	1.28892	0.020619	0.364856
AP003419.11	5.09762	5.35835	5.22798	1.46941	3.02571	0	1.49837	3.30094	1.72288	0.0206385	0.364856
SLC25A29	15.9725	18.4193	17.1959	32.327	31.0823	24.2198	29.2097	-1.73495	-0.794897	0.0206491	0.364856
MACF1	218.178	313.463	265.821	426.312	478.337	338.068	414.239	-1.55887	-0.640498	0.0210063	0.364892
ADCY3	30.5857	39.5178	35.0518	78.0624	57.7636	42.3847	59.4035	-1.70381	-0.768766	0.0209713	0.364892
MIR143HG	4.0781	0.669793	2.37394	0.367352	0.825194	0	0.397515	5.39783	2.43238	0.0206811	0.364892
OSGIN2	46.8981	56.2626	51.5804	30.6739	22.8304	37.6753	30.3932	1.70576	0.770414	0.020982	0.364892
SHC3	6.79683	10.7167	8.75676	25.8983	15.6787	11.4371	17.6714	-2.0402	-1.02871	0.0209922	0.364892
GSN	319.451	130.275	224.863	106.165	174.941	110.671	130.592	1.72193	0.784025	0.0208012	0.364892
FNBP4	126.421	135.968	131.195	324.556	165.864	160.793	217.071	-1.65668	-0.728298	0.0207439	0.364892
GOLGA6L5P	20.7303	26.7917	23.761	12.49	15.9537	13.4555	13.9664	1.7233	0.785173	0.0207787	0.364892
TUBB6	122.343	180.509	151.426	194.88	270.939	245.226	237.015	-1.56329	-0.644588	0.0209791	0.364892
HCN2	18.3514	11.7214	15.0364	11.5716	4.40103	3.36386	6.4455	2.2643	1.17907	0.0208343	0.364892
URB1	43.8395	31.8152	37.8274	66.6744	53.3625	62.5679	60.8683	-1.61543	-0.691915	0.0209034	0.364892
ARFGAP3	84.9603	73.0075	78.9839	137.941	82.5194	151.71	124.057	-1.57017	-0.650925	0.0209633	0.364892
GK	35.6833	56.2626	45.973	84.1237	59.1389	77.7053	73.6559	-1.60352	-0.68124	0.0209607	0.364892
VGLL4	97.5345	45.5459	71.5402	40.2251	37.9589	48.776	42.32	1.69241	0.759076	0.0210538	0.365242
BDKRB2	38.4021	17.7495	28.0758	4.22455	11.0026	22.5379	12.5883	2.24847	1.16894	0.021117	0.365613
GCDH	5.43746	4.68855	5.06301	8.63278	15.1285	9.41882	11.06	-2.15773	-1.10952	0.0211299	0.365613
AAMDC	19.0311	12.7261	15.8786	5.87764	11.5527	6.05496	7.82843	2.03728	1.02664	0.0213599	0.369107
IRF2BPL	120.304	94.4409	107.372	45.368	94.0721	58.5312	65.9904	1.62966	0.704568	0.0214147	0.369107
SEC11C	7.47651	21.4334	14.4549	24.2452	20.3548	40.03	28.21	-1.94181	-0.9574	0.021414	0.369107
ANKRA2	32.2849	26.1219	29.2034	15.4288	17.6041	19.5104	17.5144	1.70322	0.768263	0.0215273	0.370164
TRIM14	3.39841	5.35835	4.37838	9.00013	10.4525	9.41882	9.6238	-2.1672	-1.11583	0.0215315	0.370164
VWA8	11.2148	22.1032	16.659	29.2045	25.8561	36.6661	30.5756	-1.82455	-0.867538	0.0215629	0.370229
SERP1	116.226	155.392	135.809	200.942	141.383	345.805	229.377	-1.68757	-0.754949	0.0216465	0.370711
AGAP9	7.13667	2.34428	4.74047	11.9389	9.07713	10.0916	10.3692	-2.21649	-1.14828	0.02164	0.370711
TMEM59	158.026	122.237	140.132	88.5319	87.1955	102.598	92.7751	1.51559	0.599884	0.0217613	0.372182
VCP	449.95	558.273	504.111	802.114	726.996	767.97	765.693	-1.51925	-0.603363	0.021816	0.372182
NT5DC3	8.15619	13.3959	10.776	25.8983	13.7532	21.1923	20.2813	-1.89027	-0.918593	0.0218031	0.372182
AKR1A1	47.238	57.6022	52.4201	81.9196	81.6942	75.3506	79.6548	-1.52669	-0.610405	0.0218725	0.372408
TP53I3	62.5308	23.7777	43.1542	21.4901	25.581	24.2198	23.7636	1.81701	0.861569	0.021885	0.372408
DUSP3	38.4021	64.6351	51.5186	117.002	70.4165	67.9501	85.1228	-1.65623	-0.727907	0.021973	0.37343
GSTM2	58.1129	34.4944	46.3036	22.9595	34.108	23.8834	26.9837	1.71799	0.780719	0.0220796	0.374004
LDB1	138.655	80.3752	109.515	62.2662	85.5451	57.5221	68.4445	1.59938	0.677512	0.022085	0.374004
PITPNM1	35.6833	42.8668	39.2751	70.1643	48.1363	70.6412	62.9806	-1.60423	-0.681879	0.0220908	0.374004
XPO5	35.3435	45.211	40.2773	71.2663	55.563	61.8951	62.9082	-1.57095	-0.651634	0.0221461	0.374465
INHBE	44.1794	50.5694	47.3744	22.7758	15.4036	41.0391	26.4062	1.80417	0.851333	0.0222399	0.375576
CPNE7	167.882	161.755	164.818	305.27	273.414	189.386	256.023	-1.55608	-0.637916	0.0222853	0.375867
HSD17B11	30.9256	35.499	33.2123	16.1635	23.1054	20.1832	19.8174	1.71141	0.775185	0.0224154	0.377498
NAV2	66.6089	92.4315	79.5202	173.758	111.951	92.5063	126.072	-1.58899	-0.668106	0.0224385	0.377498
RASAL2-AS1	2.37889	1.67448	2.02669	0.734705	0	0.336386	0.35703	4.58214	2.19602	0.0225386	0.378704
SLC11A2	20.3905	37.8433	29.1169	47.2048	40.4345	61.8951	49.8448	-1.70576	-0.770414	0.0226308	0.379777
TPI1	775.518	699.934	737.726	471.864	558.656	432.593	487.704	1.51208	0.596536	0.0226682	0.379926
PHC2	53.3551	78.0309	65.693	106.165	115.252	83.7602	101.726	-1.55102	-0.633221	0.0227401	0.380396
GK5	7.13667	10.7167	8.92668	15.2451	17.6041	19.5104	17.4532	-1.90238	-0.927807	0.0227816	0.380396
PRKCDBP	41.4606	47.5553	44.508	56.9396	77.0181	76.3597	70.1058	-1.56229	-0.643658	0.0227669	0.380396
RP11-262H14.1	7.13667	5.35835	6.24751	0.551028	3.02571	3.36386	2.31353	2.84026	1.50603	0.0228199	0.38056
MTRR	17.6718	13.061	15.3664	31.0413	19.5296	29.602	26.7243	-1.74511	-0.803318	0.0229715	0.382429
CCNB1	18.6913	66.9793	42.8353	32.878	118.828	119.754	90.4865	-2.10938	-1.07682	0.0229893	0.382429
SLC1A5	806.444	621.568	714.006	527.702	435.152	448.067	470.307	1.51673	0.60096	0.0230628	0.383175
HIVEP3	2.71873	11.0516	6.88516	19.6533	13.4782	11.4371	14.8562	-2.16278	-1.11289	0.0231797	0.383686
ATP8B2	131.519	106.162	118.84	184.227	162.288	188.713	178.409	-1.50151	-0.586417	0.0231795	0.383686
MAN2C1	60.8316	70.3283	65.58	111.859	115.527	75.6869	101.024	-1.54562	-0.628184	0.0231701	0.383686
OPN3	47.238	44.5413	45.8896	19.6533	29.4319	34.3114	27.7989	1.67615	0.745153	0.0232216	0.383856
SPARC	3405.55	3051.24	3228.4	1855.31	2175.21	2381.28	2137.27	1.51111	0.595606	0.0232475	0.383856
ATP8A2	0	0.334897	0.167448	1.65309	2.75065	1.68193	2.02855	-9.95019	-3.31472	0.0233192	0.384426
CPEB1	21.7498	21.7683	21.7591	11.3879	13.2031	13.1191	12.57	1.75647	0.812681	0.0233396	0.384426
PTGDR2	3.05857	1.00469	2.03163	0	0.275065	1.00916	0.428075	5.33103	2.41441	0.0234409	0.38562
MTFR1	15.6327	24.1126	19.8726	30.6739	29.4319	44.0666	34.7241	-1.73157	-0.79208	0.0234791	0.385774
AVIL	15.9725	8.37242	12.1725	6.24499	5.77636	5.71857	5.9133	2.03581	1.0256	0.0235262	0.386072
FAM65C	9.51556	2.67917	6.09737	1.28573	1.92545	3.36386	2.19168	2.85821	1.51511	0.0236005	0.386817
CCL28	3.73826	1.33959	2.53892	0.734705	0.275065	0.672773	0.560847	4.18189	2.06416	0.0237373	0.387619
COL11A2	7.13667	9.04221	8.08944	5.14293	2.20052	2.01832	3.12059	2.40042	1.26329	0.0237655	0.387619
RP11-347C12.2	13.5937	11.7214	12.6575	29.0208	14.8535	26.5745	23.4829	-1.86074	-0.895878	0.0237582	0.387619
C5AR1	5.7773	3.68386	4.73058	2.38779	1.37532	0	1.25437	3.3173	1.73001	0.0236849	0.387619
HNRNPR	65.9292	102.813	84.3712	116.634	131.206	144.31	130.717	-1.54566	-0.628222	0.0238833	0.388216
MAPK13	6.11714	10.0469	8.08202	14.3267	16.5039	16.1465	15.6591	-1.90402	-0.929048	0.0238695	0.388216
RP11-77H9.2	3.73826	0.669793	2.20402	11.2042	2.20052	7.4005	6.93509	-3.13783	-1.64977	0.0238893	0.388216
STK40	46.2184	41.8621	44.0403	83.7563	57.2134	63.2407	68.0701	-1.55581	-0.637663	0.0240424	0.389489
PGAM5	12.2343	19.424	15.8291	24.98	32.1825	24.5562	27.2396	-1.71397	-0.777338	0.0240216	0.389489
C17orf70	22.4295	24.7824	23.6059	39.123	35.4833	42.3847	38.997	-1.64392	-0.717143	0.0240551	0.389489
MRPS6	43.1599	43.2017	43.1808	27.1841	25.3059	27.5837	26.6912	1.61583	0.692278	0.0240887	0.38956
PSMC4	62.191	67.6491	64.92	116.818	80.0438	100.916	99.2592	-1.53361	-0.616928	0.0241346	0.389831
TDRKH	1.01952	3.01407	2.0168	3.8572	7.42674	6.05496	5.77963	-2.7539	-1.46147	0.0241641	0.389835
RIT1	54.7145	60.2814	57.4979	40.7761	32.7327	33.975	35.8279	1.57293	0.653458	0.0244147	0.392929
TCOF1	63.2105	83.0544	73.1324	126.92	140.558	76.3597	114.613	-1.56973	-0.650514	0.0243999	0.392929
RP11-20I23.6	0.339841	0.334897	0.337369	3.48985	1.10026	2.01832	2.20281	-6.3025	-2.65592	0.0245698	0.394475
RGS9	5.7773	1.00469	3.391	0.551028	1.10026	1.00916	0.886815	3.83873	1.94063	0.0245442	0.394475
CD46	249.104	245.144	247.124	120.492	161.463	201.159	161.038	1.53918	0.622158	0.024695	0.396009
LRBA	24.1287	39.1829	31.6558	48.6742	42.9101	68.6228	53.4024	-1.67943	-0.747975	0.0248743	0.397335
MEST	11.5546	0.334897	5.94475	0.183676	0.550129	3.02748	1.25376	4.78401	2.25822	0.0248966	0.397335
ALG2	37.0427	34.1595	35.6011	65.205	38.234	75.6869	59.7086	-1.67516	-0.744298	0.0248382	0.397335
C17orf59	5.7773	4.35366	5.06548	13.9594	6.32648	12.4463	10.9107	-2.16403	-1.11372	0.024886	0.397335
CREG1	29.5662	29.8058	29.686	9.18381	7.15168	27.5837	14.6397	2.04519	1.03223	0.0250394	0.397435
CERS6	73.7456	75.3517	74.5487	39.4904	32.1825	66.6045	46.0925	1.62533	0.700736	0.0250409	0.397435
APBB1	93.4564	82.3846	87.9205	56.3886	67.6659	48.776	57.6102	1.52075	0.604786	0.0250183	0.397435
SEL1L	257.94	310.449	284.194	453.496	329.252	536.873	439.874	-1.54722	-0.62968	0.0250495	0.397435
DPP9	92.097	118.219	105.158	189.37	148.26	143.973	160.534	-1.53093	-0.614413	0.0250517	0.397435
PRMT5	45.1989	60.2814	52.7401	85.7768	74.2674	80.3964	80.1468	-1.52457	-0.608399	0.0251189	0.398028
ABL2	63.5503	127.931	95.7404	354.679	117.728	93.5154	188.641	-1.97143	-0.979243	0.0251654	0.398294
RPS6KA4	20.3905	42.5319	31.4612	59.5111	52.8124	46.0849	52.8028	-1.68085	-0.749194	0.0252455	0.398313
POLRMT	29.5662	35.8339	32.7001	53.6334	55.0129	45.4122	51.3528	-1.58602	-0.665414	0.0252561	0.398313
POU2F2	1.35937	0.334897	0.847131	4.04087	5.77636	1.00916	3.6088	-4.20616	-2.07251	0.0252124	0.398313
HIST2H2BE	24.4686	4.01876	14.2437	8.63278	1.37532	5.38218	5.13009	2.74454	1.45657	0.0255264	0.39883
CCRN4L	2.37889	4.01876	3.19882	9.91851	4.40103	9.75521	8.02492	-2.50223	-1.32322	0.025593	0.39883
AHI1	22.7694	36.1688	29.4691	50.8783	42.3599	52.8127	48.6836	-1.6498	-0.722287	0.0253784	0.39883
AEBP1	52.3356	114.87	83.6026	190.288	178.517	76.0233	148.276	-1.77462	-0.827512	0.0255785	0.39883
CROT	25.8279	18.7542	22.2911	6.79602	15.1285	14.1282	12.0176	1.8854	0.91487	0.0254372	0.39883
KIAA1147	16.3124	15.7401	16.0263	26.2657	27.2314	26.2381	26.5784	-1.65568	-0.727427	0.0255743	0.39883
CBWD3	2.37889	6.02814	4.20351	9.91851	10.4525	7.06412	9.14503	-2.21152	-1.14504	0.0254596	0.39883
DPYSL4	27.867	20.7636	24.3153	15.6125	12.653	13.7918	14.0191	1.70235	0.767531	0.0253969	0.39883
LRRC49	7.81635	5.69324	6.7548	10.4695	6.60155	30.6112	15.8941	-2.3299	-1.22027	0.0255926	0.39883
RP11-159D12.2	49.277	25.787	37.532	18.9186	13.2031	28.9292	20.3503	1.85202	0.889098	0.0256472	0.39883
GAREM	41.1208	37.5084	39.3146	24.6126	18.7044	28.2565	23.8578	1.65509	0.726906	0.0254153	0.39883
EHD2	844.846	459.143	651.994	333.556	547.378	323.267	401.401	1.62429	0.699808	0.025641	0.39883
MYH11	4.75778	1.67448	3.21613	0.734705	1.10026	1.00916	0.948041	3.40529	1.76778	0.0256869	0.398984
PSAT1	320.131	355.995	338.063	204.615	223.077	261.709	229.8	1.47653	0.562207	0.0257994	0.400265
BANP	10.5351	12.0563	11.2957	22.2248	18.1543	18.1649	19.5146	-1.76352	-0.818454	0.0258444	0.400499
PSPH	30.9256	41.1923	36.0589	17.8166	25.3059	20.856	21.3262	1.70898	0.773136	0.0260432	0.402645
MTMR4	31.6052	52.5788	42.092	67.7765	67.9409	61.2223	65.6466	-1.56092	-0.642395	0.0260233	0.402645
DNAJC17	4.0781	5.35835	4.71822	7.7144	11.5527	11.4371	10.2347	-2.08791	-1.06206	0.0261788	0.403806
LAS1L	22.0897	27.1266	24.6082	37.6536	48.1363	35.9933	40.5944	-1.64626	-0.71919	0.0261593	0.403806
KIF3C	78.1635	85.3986	81.7811	45.1843	70.9666	41.0391	52.3967	1.5606	0.642105	0.0263202	0.404897
DUS1L	35.6833	43.2017	39.4425	66.3071	58.0386	58.5312	60.959	-1.56266	-0.644008	0.0263404	0.404897
ARRDC2	31.2654	13.3959	22.3306	12.6737	14.0283	7.73689	11.4796	1.92702	0.946374	0.0263395	0.404897
PCMTD1	71.3667	48.56	59.9634	37.1026	20.0797	47.4305	34.8709	1.72176	0.783882	0.0264022	0.405002
BNC1	3.73826	4.01876	3.87851	12.8573	4.6761	9.41882	8.98408	-2.33425	-1.22296	0.0264079	0.405002
SYNC	98.554	79.0356	88.7948	54.7355	74.2674	38.3481	55.7837	1.58782	0.667049	0.026557	0.406356
MLEC	157.686	239.786	198.736	287.086	305.047	305.103	299.078	-1.50409	-0.588888	0.0265459	0.406356
EEF1A1P5	81.5619	55.5928	68.5774	42.9802	51.7121	32.9659	42.5527	1.60557	0.683085	0.026627	0.406961
KEAP1	141.034	149.699	145.366	90.5523	118.828	75.6869	95.0224	1.52768	0.611346	0.0267727	0.40872
SLC2A1	322.509	284.662	303.586	168.798	273.139	131.191	191.043	1.58858	0.667736	0.0269305	0.410659
SEMA3A	33.9841	49.2298	41.607	45.0007	89.396	69.9684	68.1217	-1.63202	-0.70666	0.0269978	0.411217
RBM43	13.9335	17.4146	15.6741	2.93882	7.70181	11.7735	7.47138	2.14413	1.10039	0.0271745	0.412702
SLC1A1	3.39841	3.34897	3.37369	0.918381	0.825194	1.68193	1.14184	3.06104	1.61402	0.0272855	0.412702
SAPCD2	0.679683	6.02814	3.35391	3.48985	16.2288	9.41882	9.71249	-2.8613	-1.51667	0.027197	0.412702
WDFY2	12.2343	16.075	14.1547	23.5105	29.707	21.1923	24.8033	-1.7512	-0.80834	0.0273116	0.412702
GNA13	132.878	139.317	136.097	88.8992	75.0926	112.017	92.0028	1.48469	0.57016	0.0273079	0.412702
USP36	77.8237	60.6163	69.22	146.941	70.6916	112.353	109.995	-1.59131	-0.670214	0.0271897	0.412702
C21orf58	3.73826	16.7448	10.2415	13.4084	37.1337	16.1465	22.2295	-2.16323	-1.11319	0.0272506	0.412702
CKB	20.7303	14.7355	17.7329	12.1226	10.4525	3.02748	8.53418	2.03686	1.02635	0.0273792	0.413256
FAM86DP	3.73826	3.34897	3.54361	6.97969	9.62726	8.40966	8.33887	-2.28488	-1.19212	0.0275371	0.413635
HSPB1	413.247	277.294	345.271	282.31	203.273	192.413	225.999	1.52548	0.609261	0.0276211	0.413635
NRCAM	279.689	252.512	266.101	147.308	165.589	218.988	177.295	1.50551	0.59025	0.0274945	0.413635
ZBTB44	59.8121	62.2908	61.0514	45.5517	32.1825	35.3206	37.6849	1.59629	0.674719	0.0275517	0.413635
FANCA	7.81635	42.5319	25.1741	56.9396	64.9152	33.3023	51.719	-2.05397	-1.03841	0.0275416	0.413635
CEP112	3.73826	7.03283	5.38554	11.2042	11.0026	11.1008	11.1025	-2.05282	-1.03761	0.0276197	0.413635
MICAL3	30.2459	41.1923	35.7191	51.9803	73.9924	49.4488	58.4738	-1.63537	-0.709614	0.0275857	0.413635
SGK494	1.01952	0.334897	0.67721	1.83676	3.57584	4.03664	3.14975	-4.22655	-2.07948	0.0276856	0.414137
C11orf24	43.4997	49.2298	46.3648	65.205	72.8921	74.6778	70.925	-1.51108	-0.595577	0.0277843	0.415149
TCP11L2	40.781	25.1172	32.9491	27.1841	12.928	13.7918	17.968	1.81066	0.856514	0.0279035	0.416464
VARS	83.601	93.4362	88.5186	153.37	131.756	112.353	132.493	-1.50442	-0.589211	0.0280467	0.416738
CD59	566.855	650.034	608.445	350.454	537.201	282.901	390.185	1.55912	0.640728	0.0280096	0.416738
TNFAIP8L1	4.75778	4.68855	4.72317	6.24499	18.7044	7.73689	10.8954	-2.28662	-1.19322	0.0280442	0.416738
MAP3K10	12.914	13.061	12.9875	30.4902	14.3034	26.5745	23.7894	-1.83762	-0.877841	0.028043	0.416738
GALE	20.3905	25.4521	22.9213	40.9598	40.4345	30.9476	37.4473	-1.65554	-0.727301	0.0282523	0.418577
FAM3C	17.6718	37.5084	27.5901	44.6333	41.8098	55.1674	47.2035	-1.70561	-0.770289	0.0282877	0.418577
DPF3	2.03905	4.01876	3.0289	4.5919	15.9537	4.70941	8.41835	-2.74978	-1.45932	0.0282901	0.418577
EML1	29.2264	24.7824	27.0044	41.6945	50.8869	40.7028	44.4281	-1.64113	-0.714689	0.0282958	0.418577
RAD9A	8.83588	12.7261	10.781	27.0004	13.7532	18.5013	19.7516	-1.84789	-0.88588	0.0283595	0.418939
WDR62	4.75778	32.1501	18.4539	33.4291	55.563	29.2656	39.4192	-2.13338	-1.09314	0.0284143	0.418939
C2CD2	24.8084	26.7917	25.8001	43.1639	43.1851	36.6661	41.005	-1.60696	-0.684337	0.0284098	0.418939
GAPDH	5654.28	4334.9	4994.59	3592.52	3418.78	2979.04	3330.11	1.49962	0.584599	0.0285225	0.419563
LUM	37.7224	21.7683	29.7453	6.79602	11.5527	26.2381	14.8623	2.01989	1.01428	0.0285338	0.419563
PPP5C	43.1599	64.6351	53.8975	79.1644	88.8458	78.0417	82.0173	-1.52027	-0.60433	0.0285509	0.419563
TANGO6	2.71873	5.02345	3.87109	8.08175	8.527	9.41882	8.67586	-2.19313	-1.13299	0.0286124	0.420005
AC009501.4	2.03905	1.67448	1.85677	0.183676	0.825194	0.336386	0.448419	4.20488	2.07206	0.0286584	0.420219
IFRD2	20.7303	41.5272	31.1288	69.9806	48.1363	40.3664	52.8278	-1.70207	-0.767288	0.0286921	0.420221
FAM171A2	20.3905	17.7495	19.07	11.3879	13.2031	4.70941	9.76681	1.91421	0.93675	0.0287215	0.420221
RIOK1	11.5546	11.3865	11.4705	24.0616	15.6787	19.8468	19.8624	-1.75595	-0.812254	0.0287632	0.420371
HIST2H2AA3	0	0.669793	0.334897	2.75514	1.65039	1.68193	2.02915	-5.88364	-2.55671	0.0288851	0.42129
CAB39	132.198	92.0966	112.147	77.695	72.342	76.3597	75.4656	1.48441	0.569892	0.0288892	0.42129
BRK1	119.624	84.394	102.009	66.6744	67.1157	70.6412	68.1438	1.49854	0.58356	0.0289385	0.421549
RP11-875O11.1	4.0781	2.34428	3.21119	1.28573	0.825194	0.672773	0.9279	3.14555	1.65331	0.0289887	0.42182
PNP	23.1092	25.787	24.4481	54.3681	30.5322	37.3389	40.7464	-1.67798	-0.746727	0.0291062	0.422753
DHX58	0.679683	0.334897	0.50729	2.75514	1.92545	2.35471	2.3451	-4.51022	-2.1732	0.0291161	0.422753
ARL6IP5	87.6791	97.4549	92.567	52.3477	71.2417	62.9043	62.1646	1.50055	0.58549	0.0292878	0.424784
TLN1	613.414	750.169	681.791	1098.75	966.027	942.891	1002.56	-1.47129	-0.557082	0.0294691	0.425346
PDCD11	52.6754	50.9043	51.7899	78.4297	77.8433	72.6595	76.3108	-1.48105	-0.56662	0.0293726	0.425346
DOCK1	58.4527	81.3799	69.9163	126.369	99.8484	89.4788	105.232	-1.51034	-0.594871	0.0294752	0.425346
LRP5	21.0702	23.4428	22.2565	39.674	40.9846	28.5928	36.4172	-1.6553	-0.727092	0.0294857	0.425346
TVP23C	5.43746	4.68855	5.06301	10.1022	9.62726	10.7644	10.1646	-1.99363	-0.995397	0.029429	0.425346
IGF2BP2	83.601	108.172	95.8863	200.207	126.53	119.417	148.718	-1.55443	-0.636382	0.0297506	0.427321
DAP	132.538	150.369	141.453	203.513	216.751	208.56	209.608	-1.47827	-0.563909	0.0296632	0.427321
HSPA12A	16.3124	18.4193	17.3659	25.1636	29.1568	35.657	29.9925	-1.69172	-0.758487	0.0297123	0.427321
ROGDI	18.6913	14.4006	16.5459	6.97969	11.5527	9.08243	9.20495	1.84025	0.879899	0.0297495	0.427321
NPC1	48.9372	85.7335	67.3354	175.227	65.4654	101.925	114.206	-1.69776	-0.763636	0.0298676	0.428541
HECA	65.5894	40.5225	53.0559	35.4495	20.0797	38.0117	31.1803	1.70053	0.765985	0.0300567	0.430173
CDCA7L	9.17572	20.4287	14.8022	32.6944	22.5553	23.5471	26.2656	-1.78137	-0.832988	0.0300602	0.430173
UTP20	37.7224	44.2064	40.9644	56.5722	72.0669	59.5404	62.7265	-1.52385	-0.607722	0.030078	0.430173
KAZN	5.09762	4.68855	4.89309	11.0206	11.5527	6.72773	9.767	-2.05909	-1.04201	0.0307505	0.430725
EIF4G3	118.605	133.959	126.282	224.085	203.823	142.291	190.066	-1.50847	-0.593088	0.030819	0.430725
UBXN11	6.45699	6.69793	6.57746	12.49	14.5784	11.1008	12.723	-1.93721	-0.953979	0.0306834	0.430725
GCLM	228.034	319.491	273.762	195.982	150.185	196.786	180.985	1.51231	0.596755	0.0307615	0.430725
IL24	0	0.334897	0.167448	2.75514	1.10026	1.34555	1.73365	-9.32047	-3.2204	0.030551	0.430725
BROX	72.7261	74.682	73.704	49.5926	40.9846	57.1857	49.2543	1.50457	0.589356	0.0306	0.430725
SRSF7	53.6949	51.909	52.802	92.9401	71.2417	71.9867	78.7228	-1.50326	-0.588092	0.0309711	0.430725
HEG1	231.772	197.924	214.848	109.471	171.09	149.692	143.418	1.50161	0.586508	0.0309872	0.430725
WHSC1	60.8316	185.198	123.015	187.717	261.311	178.621	209.217	-1.7004	-0.765873	0.0302905	0.430725
LYAR	6.79683	8.70731	7.75207	16.1635	14.5784	11.7735	14.1718	-1.87497	-0.906866	0.030338	0.430725
ETFDH	51.316	48.56	49.938	30.3066	29.982	33.975	31.4212	1.60247	0.680293	0.030864	0.430725
RP11-1280N14.3	0	0	0	0.918381	7.15168	5.71857	4.59621	-130.82	-7.03144	0.0305963	0.430725
CHSY3	3.39841	8.70731	6.05286	13.7757	11.0026	11.7735	12.1839	-2.03197	-1.02288	0.0302067	0.430725
SNX3	146.132	137.308	141.72	84.3073	82.5194	117.735	94.854	1.50197	0.586853	0.030733	0.430725
ORAI2	49.277	30.8105	40.0437	57.307	56.9384	74.6778	62.9744	-1.56686	-0.647877	0.0308621	0.430725
TNFRSF10C	12.2343	5.02345	8.62887	2.02044	4.6761	4.37302	3.68985	2.39329	1.259	0.0309405	0.430725
DOCK5	35.3435	42.5319	38.9377	54.3681	67.9409	60.2132	60.8407	-1.55031	-0.632554	0.0308585	0.430725
MAMDC2	15.9725	4.35366	10.1631	2.02044	5.77636	4.37302	4.05661	2.53055	1.33945	0.0303733	0.430725
PDCD4	117.245	98.1247	107.685	72.7357	44.5605	89.8152	69.0371	1.56143	0.64287	0.0310194	0.430725
GLT8D2	16.9921	8.37242	12.6822	4.5919	4.12597	9.75521	6.15769	2.09922	1.06985	0.0302479	0.430725
SRP54	65.9292	62.9606	64.4449	84.8584	78.9435	137.246	100.349	-1.55192	-0.634053	0.0305938	0.430725
NIN	70.0073	98.4596	84.2335	121.961	148.26	105.962	125.394	-1.48935	-0.574679	0.0303064	0.430725
PPM1A	84.6205	64.6351	74.6278	54.0008	46.2108	47.4305	49.214	1.50465	0.589425	0.0304301	0.430725
GLDN	1.69921	5.02345	3.36133	0.734705	1.37532	1.00916	1.03973	3.27269	1.71048	0.0309553	0.430725
KIAA1024	5.09762	4.68855	4.89309	17.8166	4.95116	10.0916	10.9531	-2.25568	-1.17356	0.0306777	0.430725
TMEM143	11.2148	6.36304	8.7889	3.30617	5.22623	3.36386	3.96542	2.22905	1.15643	0.0304459	0.430725
APCDD1L-AS1	35.6833	21.0985	28.3909	6.97969	24.7558	11.4371	14.3909	1.97907	0.984819	0.030888	0.430725
CHIC1	16.9921	12.3912	14.6916	6.79602	7.42674	9.75521	7.99266	1.89593	0.922906	0.0307525	0.430725
SYNPO	19.7108	7.70262	13.7067	5.87764	6.60155	7.73689	6.73869	2.04662	1.03324	0.0311321	0.431841
ARHGEF10L	12.914	14.0657	13.4898	24.7963	23.1054	19.8468	22.5828	-1.70445	-0.769306	0.0311695	0.431911
CCDC107	10.8749	8.03752	9.45622	17.6329	17.8792	15.4738	16.9953	-1.81401	-0.859179	0.0312144	0.432085
COL12A1	569.234	809.78	689.507	968.341	1083.75	1011.51	1021.2	-1.48082	-0.566393	0.0312662	0.432355
JAGN1	58.7926	60.2814	59.537	36.9189	37.1337	41.3755	38.476	1.56094	0.642418	0.0313096	0.432506
PSEN2	0.339841	1.33959	0.839714	3.67352	3.57584	2.01832	3.08923	-3.72138	-1.89584	0.0313889	0.432563
WWC2	37.0427	56.2626	46.6527	100.471	70.4165	51.8035	74.2303	-1.59644	-0.674857	0.0314108	0.432563
KCNIP2	0.339841	0	0.169921	1.65309	1.92545	1.68193	1.75349	-8.72622	-3.12536	0.0314081	0.432563
HYI	16.6522	9.712	13.1821	28.4698	20.9049	19.5104	22.9617	-1.76346	-0.818406	0.0314606	0.432802
HOXB2	19.0311	22.773	20.902	32.5107	40.7095	30.2748	34.4983	-1.64838	-0.721046	0.0315126	0.432852
RPL17-C18orf32	42.82	23.4428	33.1314	14.5104	8.80206	29.2656	17.526	1.90018	0.926134	0.031529	0.432852
TNKS1BP1	292.943	268.252	280.598	188.268	210.149	176.939	191.786	1.46117	0.547125	0.0316032	0.433128
LMNB2	66.6089	175.486	121.047	166.594	236.005	194.095	198.898	-1.64243	-0.71583	0.031614	0.433128
AMOTL1	54.7145	89.7523	72.2334	94.2259	121.303	112.353	109.294	-1.51001	-0.59456	0.0317206	0.433902
ZC3H12C	29.5662	37.5084	33.5373	71.8174	28.6067	77.3689	59.2643	-1.76626	-0.820701	0.0317981	0.433902
IL32	1.35937	5.69324	3.5263	13.9594	6.05142	6.05496	8.68859	-2.47719	-1.3087	0.0317804	0.433902
SLC22A31	0	0.669793	0.334897	2.02044	2.47558	1.68193	2.05932	-5.66398	-2.50182	0.0318004	0.433902
GPSM2	13.2538	30.4756	21.8647	21.4901	50.8869	50.458	40.945	-1.8647	-0.898945	0.0319446	0.434611
SMYD5	13.9335	21.7683	17.8509	29.0208	33.8329	28.2565	30.3701	-1.69426	-0.760658	0.03195	0.434611
C21orf59	17.3319	14.7355	16.0337	25.8983	28.6067	24.2198	26.2416	-1.63984	-0.713557	0.0319428	0.434611
WASF3	35.6833	33.8246	34.754	20.3881	18.9795	24.5562	21.3079	1.65262	0.724759	0.0320065	0.434937
TBL1XR1	70.0073	59.9465	64.9769	28.6535	39.6093	53.8218	40.6949	1.6111	0.688048	0.0320848	0.43517
TTC3	285.807	281.313	283.56	391.414	394.993	462.868	416.425	-1.46464	-0.550546	0.0320888	0.43517
LZTR1	51.6559	63.6304	57.6431	90.9197	77.2931	87.7969	85.3366	-1.48483	-0.5703	0.0321301	0.435288
THAP6	15.6327	14.7355	15.1841	9.00013	6.87661	8.40966	8.09547	1.84575	0.884204	0.032165	0.43532
SRGAP2	137.296	123.912	130.604	77.3277	112.776	76.6961	88.9334	1.46944	0.555266	0.0322316	0.435778
PHLDB3	12.914	5.35835	9.13616	3.48985	4.40103	4.37302	4.08797	2.2521	1.17127	0.032302	0.43629
SCAPER	9.8554	6.36304	8.10922	19.1023	11.8278	13.7918	14.9073	-1.86859	-0.90195	0.0326196	0.440134
MMP23A	0.339841	3.34897	1.8444	0.551028	0.275065	0	0.275364	5.44321	2.44446	0.032814	0.441864
SIAH2	34.6638	31.4803	33.0721	59.1437	36.5836	66.9409	54.2227	-1.63762	-0.711604	0.0327962	0.441864
CDH4	21.7498	104.153	62.9514	155.757	109.751	86.4513	117.32	-1.86398	-0.898385	0.0328857	0.442383
SLC5A3_2	29.906	44.5413	37.2236	16.5309	31.3574	17.1557	21.6813	1.72003	0.782436	0.0329994	0.443466
CEBPD	87.6791	42.197	64.938	25.7147	16.5039	59.8768	34.0318	1.91302	0.935853	0.0330332	0.443475
SRSF3	118.605	153.048	135.826	236.208	151.285	232.779	206.757	-1.52242	-0.606365	0.033228	0.444027
HMBS	9.17572	16.7448	12.9603	20.9391	24.7558	22.5379	22.7443	-1.7352	-0.795104	0.033248	0.444027
IGDCC4	13.5937	4.35366	8.97366	2.38779	1.10026	6.72773	3.40526	2.67264	1.41827	0.0331929	0.444027
KLF2	17.3319	25.787	21.5595	41.3271	34.9332	29.602	35.2874	-1.65279	-0.724906	0.033263	0.444027
NFATC2	1.35937	1.33959	1.34948	4.40823	0.825194	9.08243	4.77195	-3.43831	-1.7817	0.0332737	0.444027
LSS	102.632	88.7476	95.6899	123.981	128.18	174.248	142.137	-1.48002	-0.565615	0.0332357	0.444027
STEAP1	4.0781	6.02814	5.05312	9.55116	10.7275	10.0916	10.1234	-1.97794	-0.983996	0.0333537	0.44465
FAM160B2	53.3551	41.5272	47.4411	75.4909	69.0412	66.2681	70.2667	-1.49712	-0.582186	0.033517	0.445566
PITPNA	68.3081	74.0122	71.1601	112.777	97.923	96.5429	102.414	-1.45312	-0.539153	0.0335165	0.445566
TIMP3	149.19	88.7476	118.969	58.5927	112.776	35.9933	69.1208	1.71994	0.78236	0.0335225	0.445566
RP11-640M9.2	18.3514	23.1079	20.7297	35.2658	33.2828	31.2839	33.2775	-1.62025	-0.696217	0.0335698	0.445751
POLR2J2_2	21.41	7.70262	14.5563	27.0004	28.0566	23.5471	26.2013	-1.80226	-0.849811	0.0337384	0.447545
TUBA1B	285.467	1140.32	712.895	960.994	1730.43	1181.39	1290.94	-1.81074	-0.856579	0.0339131	0.449416
HTRA1	224.635	225.72	225.178	133.9	146.884	178.958	153.247	1.47734	0.562998	0.0339789	0.449842
KIAA1107	7.13667	7.36773	7.2522	1.46941	4.40103	4.03664	3.30236	2.33176	1.22142	0.0341295	0.450051
GORASP2	117.245	121.233	119.239	213.983	117.728	217.306	183.005	-1.53487	-0.618114	0.0340773	0.450051
NET1	5.43746	16.075	10.7563	21.6738	22.8304	15.4738	19.9926	-1.86081	-0.895931	0.0341095	0.450051
FKBP4	208.323	224.716	216.519	189.003	128.18	113.026	143.403	1.50491	0.589676	0.0340797	0.450051
RP11-166D19.1	162.784	84.0591	123.422	72.7357	96.5476	67.9501	79.0778	1.56023	0.641757	0.0342071	0.450629
TFDP2	46.2184	57.2673	51.7429	29.9392	36.3085	33.6386	33.2955	1.57278	0.653313	0.0343745	0.451943
KIAA0368	153.948	182.184	168.066	269.637	232.98	232.443	245.02	-1.46204	-0.547979	0.0343628	0.451943
C1D	16.6522	17.0797	16.866	8.63278	11.0026	9.75521	9.79686	1.74851	0.806126	0.0344641	0.452231
ATG4B	61.1714	56.5975	58.8845	119.941	68.4911	81.4055	89.9457	-1.53301	-0.616363	0.0344332	0.452231
SOX4	48.5973	16.075	32.3362	13.7757	18.1543	21.5287	17.8196	1.82092	0.864665	0.0344994	0.45225
DNAJC10	101.613	160.081	130.847	165.86	165.589	279.874	203.774	-1.55533	-0.637221	0.0345589	0.452403
CREB3L1	382.322	239.116	310.719	162.37	273.139	163.484	199.664	1.55634	0.638154	0.0345907	0.452403
SOGA2	110.788	73.3424	92.0653	57.6743	72.8921	50.7944	60.4536	1.52096	0.604986	0.0346127	0.452403
PPM1F	50.6364	46.5506	48.5935	80.0828	73.9924	61.2223	71.7658	-1.49306	-0.578277	0.0347103	0.453235
FAM213B	19.371	32.1501	25.7605	42.9802	53.3625	31.6203	42.6544	-1.65854	-0.729913	0.0353866	0.453642
IL1R1	157.007	93.1013	125.054	72.7357	67.3908	105.962	82.0294	1.52756	0.611232	0.0350269	0.453642
ABCC10	31.9451	35.499	33.7221	49.5926	55.8381	51.1307	52.1871	-1.53875	-0.621758	0.0353595	0.453642
ARHGAP18	7.47651	11.7214	9.59895	12.6737	25.8561	15.8102	18.1133	-1.8727	-0.905122	0.0353464	0.453642
C8orf44-SGK3	1.35937	3.68386	2.52161	0.367352	1.10026	0.672773	0.713461	3.64477	1.86583	0.0350773	0.453642
KLF6	134.237	181.514	157.876	195.615	251.134	258.345	235.031	-1.48583	-0.571273	0.0349007	0.453642
RP11-762I7.5	8.15619	8.70731	8.43175	4.5919	0.825194	5.0458	3.48763	2.39583	1.26053	0.0352848	0.453642
POMT2	27.867	34.8293	31.3481	51.7967	48.4114	45.4122	48.5401	-1.56414	-0.645365	0.0352783	0.453642
MEG3	1158.52	888.146	1023.33	1705.62	1945.26	1054.57	1568.48	-1.53291	-0.616274	0.0350798	0.453642
RP11-932O9.7	1.69921	2.00938	1.85429	0	0.825194	0.672773	0.499322	4.20398	2.07176	0.0349535	0.453642
HCFC1R1	34.324	14.7355	24.5297	16.3472	15.1285	9.41882	13.6315	1.78145	0.83305	0.0353627	0.453642
SHCBP1	9.8554	68.6538	39.2546	57.858	85.27	90.8243	77.9841	-1.98455	-0.988814	0.0350338	0.453642
ATP6V0D1	56.7535	80.3752	68.5644	135.92	83.6196	92.1699	103.903	-1.51928	-0.60339	0.0351522	0.453642
SUMO2	128.46	132.619	130.54	75.8582	108.1	87.7969	90.5852	1.44649	0.532561	0.0348715	0.453642
DEDD2	26.1678	34.4944	30.3311	84.6747	30.5322	43.0575	52.7548	-1.74445	-0.802771	0.0348597	0.453642
RHBDD3	11.5546	13.3959	12.4752	27.7351	21.455	15.1374	21.4425	-1.74608	-0.804116	0.0351387	0.453642
RRP7B	4.75778	5.69324	5.22551	9.18381	14.0283	8.40966	10.5406	-2.00285	-1.00206	0.0350908	0.453642
FHL1	82.9213	72.0028	77.462	42.9802	58.0386	56.1765	52.3985	1.49325	0.578459	0.0349892	0.453642
ZNF275	29.2264	24.7824	27.0044	58.7764	27.2314	52.4763	46.1613	-1.71188	-0.775578	0.0352364	0.453642
NOX4	7.47651	8.37242	7.92446	3.48985	3.8509	4.03664	3.79246	2.11256	1.07899	0.0354288	0.453747
HSD11B1	38.4021	19.7589	29.0805	11.0206	8.25194	26.2381	15.1702	1.93026	0.948795	0.0354971	0.454146
MN1	10.1952	3.68386	6.93955	3.48985	3.02571	2.01832	2.84462	2.35792	1.23752	0.035528	0.454146
TRIM68	22.7694	24.7824	23.7759	14.3267	18.1543	9.41882	13.9666	1.67638	0.745347	0.0355791	0.454365
ZBTB22	32.6248	24.1126	28.3687	16.5309	18.7044	16.8193	17.3515	1.64011	0.713796	0.0357601	0.455626
FAM203A	11.5546	17.0797	14.3172	24.6126	23.6555	24.2198	24.1627	-1.68769	-0.755054	0.035767	0.455626
FAM120C	6.79683	6.02814	6.41248	7.7144	18.1543	13.7918	13.2202	-2.02985	-1.02137	0.0357801	0.455626
RNASEL	21.41	16.075	18.7425	7.34705	12.1028	12.7827	10.7442	1.79335	0.842655	0.0358649	0.455664
PTPRN	64.23	45.8808	55.0554	92.9401	65.1903	91.4971	83.2092	-1.51268	-0.59711	0.0358341	0.455664
TBC1D19	15.6327	25.1172	20.375	9.91851	8.80206	15.8102	11.5102	1.79822	0.846569	0.0359196	0.455664
FBXW8	33.9841	28.1313	31.0577	46.6537	46.2108	54.4946	49.1197	-1.56372	-0.644983	0.0359023	0.455664
SAMD9L	20.0506	13.061	16.5558	2.02044	9.90232	11.1008	7.6745	2.18469	1.12743	0.0359603	0.455747
CTD-2369P2.12	5.7773	7.36773	6.57251	4.22455	2.75065	0	2.32507	2.70121	1.43361	0.0360303	0.456202
U2AF1	71.0268	86.4033	78.7151	132.614	110.851	97.8885	113.785	-1.45273	-0.538769	0.0360955	0.456594
ZNF219	8.49603	9.37711	8.93657	2.93882	4.6761	5.71857	4.44449	2.14283	1.09952	0.036192	0.457382
ARHGAP31	14.953	20.4287	17.6909	27.0004	31.9075	29.602	29.5033	-1.64574	-0.718733	0.0363654	0.458435
IDE	28.5467	47.8902	38.2184	51.7967	53.6376	78.7144	61.3829	-1.59893	-0.67711	0.0363783	0.458435
JMJD7	1.01952	0	0.509762	2.20411	2.47558	2.35471	2.3448	-4.35858	-2.12386	0.0363647	0.458435
ETFB	79.183	50.9043	65.0437	25.3473	47.5862	46.0849	39.6728	1.64784	0.720575	0.0364609	0.459043
PRKAB2	76.4643	62.6257	69.545	41.8782	44.0103	56.1765	47.355	1.48452	0.569992	0.0365729	0.459687
LAMB3	11.2148	6.36304	8.7889	2.75514	4.40103	5.38218	4.17945	2.18943	1.13055	0.0365915	0.459687
AHNAK2	83.2611	59.9465	71.6038	99.5525	211.8	59.204	123.519	-1.72511	-0.786685	0.0366153	0.459687
MTOR	63.5503	117.549	90.5495	141.063	141.658	129.172	137.298	-1.51638	-0.600628	0.0367194	0.460368
EDEM1	93.7962	114.87	104.333	159.615	123.229	185.685	156.176	-1.49513	-0.580269	0.0368209	0.460368
RP11-15J10.1	0	0.334897	0.167448	1.83676	0.550129	3.02748	1.80479	-8.84213	-3.14439	0.0367718	0.460368
BTG1	199.827	150.703	175.265	150.982	86.0952	106.298	114.458	1.52735	0.61103	0.0368419	0.460368
THRA	59.4722	46.5506	53.0114	34.5311	33.8329	34.9842	34.4494	1.53785	0.62091	0.0367739	0.460368
MGST1	380.962	415.942	398.452	229.963	243.982	336.723	270.223	1.47741	0.563067	0.0369703	0.461111
SMOX	64.9097	35.1641	50.0369	37.4699	22.0052	28.9292	29.4681	1.6892	0.75634	0.0369572	0.461111
TNFAIP8L3	13.5937	10.0469	11.8203	6.24499	6.60155	6.05496	6.3005	1.86783	0.90136	0.0370211	0.461313
HEMK1	22.0897	17.4146	19.7522	26.633	37.9589	33.975	32.8557	-1.64475	-0.717869	0.0373595	0.461766
FBXL17	11.5546	17.7495	14.6521	26.633	21.455	26.2381	24.7754	-1.69759	-0.763488	0.0372378	0.461766
HSD17B4	65.9292	84.394	75.1616	92.2054	102.324	141.619	112.049	-1.48489	-0.570357	0.037138	0.461766
CBWD7	3.05857	3.34897	3.20377	1.28573	1.10026	0.672773	1.01959	2.9109	1.54146	0.0373352	0.461766
FIBCD1	24.4686	18.0844	21.2765	11.3879	14.5784	11.7735	12.58	1.70467	0.769495	0.0373439	0.461766
STX3	17.6718	32.8199	25.2458	86.5115	28.6067	29.2656	48.1279	-1.91107	-0.934379	0.0373222	0.461766
TCF25	97.1946	108.172	102.683	154.655	149.085	139.937	147.892	-1.44855	-0.534606	0.0372724	0.461766
NDEL1	72.0464	84.0591	78.0527	161.819	76.1929	120.09	119.367	-1.53139	-0.614843	0.0371154	0.461766
RFX2	2.37889	5.02345	3.70117	4.77558	8.80206	12.7827	8.78678	-2.31106	-1.20855	0.0373686	0.461766
TMEM132A	33.9841	34.1595	34.0718	51.062	50.3368	57.5221	52.9736	-1.54093	-0.623804	0.0374381	0.462198
HNRNPA3	174.339	240.456	207.397	273.126	309.998	322.595	301.906	-1.45372	-0.539748	0.0375968	0.463729
BCL2	0	0.669793	0.334897	3.8572	1.65039	0.672773	2.06012	-5.90199	-2.5612	0.0376667	0.464163
SNX8	34.324	49.5647	41.9443	87.9809	48.9615	58.1949	65.0457	-1.55608	-0.637919	0.0377276	0.464484
CLASP2	40.4411	65.9746	53.2079	78.7971	85.8201	75.3506	79.9893	-1.50288	-0.587731	0.0378106	0.464649
RAD50	63.8902	55.2579	59.5741	78.0624	95.4474	91.4971	88.3356	-1.47171	-0.557496	0.0377925	0.464649
LRRFIP1	105.351	113.195	109.273	192.676	144.409	143.973	160.353	-1.47312	-0.558871	0.0379929	0.46646
SNX22	0.679683	1.00469	0.842186	4.22455	1.37532	3.70025	3.10004	-3.64093	-1.86431	0.0380716	0.466997
PUS7	7.47651	10.3818	8.92915	19.6533	11.8278	16.8193	16.1001	-1.81906	-0.86319	0.0383003	0.469372
CADM3	29.5662	13.061	21.3136	12.6737	9.62726	12.7827	11.6945	1.81715	0.86168	0.0383853	0.469552
AC005519.4	0.679683	1.67448	1.17708	4.40823	3.8509	2.35471	3.53795	-3.09732	-1.63102	0.0383765	0.469552
H2AFX	28.5467	75.0169	51.7818	63.1846	114.702	80.7327	86.2064	-1.66294	-0.733739	0.0384796	0.469845
HERC1	66.6089	99.7992	83.2041	127.839	122.404	110.671	120.304	-1.44793	-0.533993	0.0384764	0.469845
SRP72	117.925	127.931	122.928	196.717	133.681	217.642	182.68	-1.48543	-0.570879	0.0385511	0.470289
FAM47E-STBD1_1	15.6327	7.36773	11.5002	7.34705	2.20052	6.39134	5.31297	2.13807	1.09631	0.0385943	0.470386
SAMD9	55.3941	44.8762	50.1351	16.7145	44.8355	25.9018	29.1506	1.72541	0.786936	0.0386627	0.470618
TRAF3	24.1287	28.1313	26.13	50.3273	33.2828	40.7028	41.4376	-1.59758	-0.675885	0.0386838	0.470618
DPYD	10.8749	14.0657	12.4703	20.7554	15.6787	28.2565	21.5635	-1.71188	-0.775584	0.0387416	0.470643
EPOR	4.0781	6.69793	5.38801	9.55116	10.7275	11.7735	10.6841	-1.93253	-0.950492	0.0387563	0.470643
VKORC1	91.0775	83.3893	87.2334	61.3478	64.09	53.1491	59.529	1.45212	0.538161	0.0387938	0.47067
WNK4	4.0781	2.34428	3.21119	6.97969	13.7532	3.36386	8.03226	-2.49748	-1.32047	0.0388665	0.470697
RAB4B-EGLN2	6.79683	0	3.39841	0.183676	0	1.68193	0.621869	5.42419	2.43941	0.0388352	0.470697
MICAL2	235.17	330.878	283.024	502.538	369.412	386.172	419.374	-1.4828	-0.568326	0.0389926	0.471797
CENPF	25.1483	188.882	107.015	103.042	386.741	211.251	233.678	-2.18283	-1.1262	0.0391768	0.472914
SPHK1	19.0311	23.4428	21.2369	91.287	21.455	19.174	43.972	-2.07521	-1.05326	0.0392593	0.472914
ZNF337-AS1	5.43746	1.33959	3.38852	0.734705	0.275065	2.01832	1.00936	3.4457	1.7848	0.0392551	0.472914
TMEM47	111.808	90.757	101.282	61.3478	49.2365	89.4788	66.6877	1.52369	0.607573	0.0391328	0.472914
FOXO4	21.7498	23.4428	22.5963	14.5104	14.3034	12.7827	13.8655	1.61136	0.688278	0.039262	0.472914
TRAPPC9	8.49603	15.0703	11.7832	25.531	19.8046	15.4738	20.2698	-1.73928	-0.798491	0.0393562	0.473195
CTD-2303H24.2	0	0.334897	0.167448	2.20411	0.825194	1.68193	1.57041	-8.31469	-3.05566	0.0393558	0.473195
GRAMD3	4.0781	5.35835	4.71822	8.08175	9.35219	12.1099	9.84795	-1.99827	-0.99875	0.0394928	0.474411
TIMM17A	39.0818	47.2204	43.1511	63.5519	51.162	81.0691	65.261	-1.50632	-0.591029	0.0395597	0.474788
KB-1208A12.3	0.679683	0.669793	0.674738	2.75514	1.92545	3.02748	2.56936	-3.6728	-1.87688	0.0396004	0.474849
THY1	0.679683	0	0.339841	2.38779	3.57584	0.336386	2.1	-5.83603	-2.54499	0.0396883	0.475476
GSTA4	28.5467	15.7401	22.1434	6.42866	14.8535	15.1374	12.1398	1.84616	0.884531	0.0398208	0.476636
ARHGAP19-SLIT1	0	0.669793	0.334897	2.57147	3.30077	0.336386	2.06954	-5.80258	-2.53669	0.039915	0.476952
ANKS3	15.6327	12.0563	13.8445	24.98	19.2545	25.229	23.1545	-1.68224	-0.750381	0.0399186	0.476952
GOLGA2P7	27.1873	25.4521	26.3197	38.2046	42.0849	45.4122	41.9006	-1.5673	-0.648285	0.0399585	0.477003
MAP3K6	11.2148	15.0703	13.1426	35.0821	19.8046	15.4738	23.4535	-1.80179	-0.849433	0.0402715	0.478326
STC2	1530.99	1682.86	1606.92	1376.47	930.268	977.875	1094.87	1.46699	0.552859	0.0402894	0.478326
DNAJB5	4.0781	6.36304	5.22057	12.1226	11.0026	7.06412	10.0631	-1.98169	-0.986729	0.0403966	0.478326
ERCC6	25.4881	18.4193	21.9537	11.9389	15.1285	13.1191	13.3955	1.65854	0.729916	0.0402117	0.478326
EFCAB4B	0.339841	0	0.169921	2.57147	1.92545	0.336386	1.6111	-8.57243	-3.0997	0.0404135	0.478326
HSPB8	97.1946	69.3236	83.2591	74.9399	46.4859	38.0117	53.1458	1.5574	0.639137	0.0401541	0.478326
CHTF18	15.9725	49.5647	32.7686	57.6743	83.6196	37.0025	59.4321	-1.8136	-0.858852	0.0404275	0.478326
ZFP3	9.51556	5.69324	7.6044	3.12249	1.92545	5.38218	3.47671	2.24561	1.16711	0.0402158	0.478326
IFNAR1	65.2495	90.0872	77.6684	42.4292	48.1363	65.259	51.9415	1.50561	0.590346	0.0403268	0.478326
FAM118A	49.277	42.8668	46.0719	59.3274	76.743	70.6412	68.9038	-1.48407	-0.569561	0.0401963	0.478326
MEI1	0.679683	1.33959	1.00963	2.02044	1.92545	7.4005	3.78213	-3.54317	-1.82504	0.04047	0.478405
NXPH4	10.1952	5.02345	7.60935	3.30617	3.02571	4.37302	3.5683	2.15851	1.11003	0.0405447	0.478865
ATXN3	33.6443	30.4756	32.0599	14.3267	23.1054	22.5379	19.99	1.63511	0.70939	0.040646	0.479637
ZNF75D	14.953	14.0657	14.5093	27.3677	18.7044	26.2381	24.1034	-1.67151	-0.741149	0.0407611	0.480571
EHD3	34.6638	26.4568	30.5603	35.6332	42.0849	75.0142	50.9107	-1.65673	-0.728334	0.0409111	0.481914
TPRN	11.8944	16.7448	14.3196	32.1433	20.3548	20.5196	24.3392	-1.71934	-0.781852	0.040996	0.482114
RAP1GAP2	0	0	0	6.24499	4.40103	0	3.54867	-103.316	-6.69092	0.0410003	0.482114
TRPC4	0	1.00469	0.502345	3.12249	2.47558	1.00916	2.20241	-4.43292	-2.14826	0.0410891	0.482733
GTF2E1	13.9335	14.7355	14.3345	6.79602	10.4525	6.39134	7.87994	1.83362	0.874697	0.0411472	0.482992
CRABP2	13.9335	4.01876	8.97613	5.14293	4.12597	1.68193	3.65028	2.38839	1.25604	0.0412468	0.483312
ACER2	7.47651	1.67448	4.5755	0.183676	1.65039	2.35471	1.39626	3.37688	1.75569	0.041245	0.483312
TNFSF13	0.339841	0	0.169921	1.65309	1.92545	1.00916	1.52923	-7.90964	-2.98361	0.0413725	0.484359
PEAR1	34.6638	31.4803	33.0721	67.4091	64.6402	30.9476	54.3323	-1.6493	-0.721854	0.0415481	0.485989
CMYA5	1.69921	2.67917	2.18919	13.9594	2.75065	2.35471	6.35491	-2.92152	-1.54672	0.0415914	0.48607
TVP23C-CDRT4	15.9725	16.075	16.0238	38.3883	14.3034	30.9476	27.8797	-1.74432	-0.802667	0.0417812	0.487862
STK38	92.097	76.0215	84.0593	45.7354	74.2674	47.4305	55.8111	1.5079	0.592537	0.0418424	0.488149
TEAD4	3.05857	4.35366	3.70611	12.6737	9.07713	3.36386	8.37155	-2.28964	-1.19512	0.041884	0.488209
MTMR9LP	1.01952	0.669793	0.844659	2.75514	3.02571	3.02748	2.93611	-3.34601	-1.74244	0.0420347	0.489316
RTN3	268.475	301.072	284.773	177.247	201.897	218.315	199.153	1.43665	0.522709	0.042089	0.489316
CCR7	18.3514	2.34428	10.3479	2.20411	6.87661	2.35471	3.81181	2.70615	1.43624	0.0420821	0.489316
CLUH	55.0543	70.6632	62.8587	138.675	86.3703	66.6045	97.2168	-1.55108	-0.633275	0.0421837	0.489991
PMF1-BGLAP	7.47651	11.7214	9.59895	4.04087	4.12597	6.39134	4.85273	2.05751	1.0409	0.0423499	0.490216
ARF4	238.908	276.29	257.599	423.006	281.666	437.975	380.882	-1.47853	-0.564168	0.0423487	0.490216
KIAA0226	27.1873	33.4897	30.3385	64.103	42.3599	38.0117	48.1582	-1.59904	-0.677202	0.0423429	0.490216
CTGF	234.491	658.407	446.449	488.579	1032.87	740.05	753.832	-1.68827	-0.755547	0.0423348	0.490216
SYT14	1.35937	3.34897	2.35417	7.89807	4.40103	4.37302	5.55738	-2.41638	-1.27285	0.0424451	0.490859
MYEF2	2.71873	7.70262	5.21068	8.63278	11.0026	12.4463	10.6939	-2.00656	-1.00473	0.0424789	0.490859
PTPRG	65.9292	106.832	86.3806	135.737	113.327	134.218	127.76	-1.4789	-0.564529	0.0425608	0.491381
CSGALNACT2	55.734	74.682	65.208	127.104	80.869	84.433	97.4686	-1.49957	-0.584545	0.0426448	0.491604
VPS9D1	22.0897	20.4287	21.2592	35.8168	34.9332	28.9292	33.2264	-1.58838	-0.667559	0.0426537	0.491604
HERC2	83.2611	131.949	107.605	162.002	169.165	147.001	159.389	-1.48166	-0.567212	0.0427267	0.492021
DPF1	0.339841	1.33959	0.839714	3.12249	3.57584	2.01832	2.90555	-3.43913	-1.78204	0.0428255	0.492733
ITGA11	41.1208	12.3912	26.756	3.8572	4.6761	25.5654	11.3662	2.36694	1.24302	0.0429517	0.493759
PPP1R3G	4.0781	0.669793	2.37394	0.551028	0.275065	1.00916	0.611751	3.84902	1.94449	0.0432407	0.494733
BNIP3L	155.987	127.596	141.791	98.8178	73.7173	115.717	96.084	1.47747	0.563127	0.0431123	0.494733
RP11-347I19.8	2.37889	1.67448	2.02669	0.551028	0.550129	0.672773	0.59131	3.34562	1.74227	0.0433038	0.494733
PLEK2	1.35937	3.34897	2.35417	8.63278	6.32648	2.69109	5.88345	-2.53613	-1.34263	0.0430884	0.494733
RP11-106M3.3	0.679683	2.00938	1.34453	6.06131	3.57584	2.01832	3.88516	-2.95032	-1.56087	0.0431681	0.494733
CCNF	5.43746	27.7964	16.6169	13.041	56.6633	37.6753	35.7932	-2.14798	-1.10298	0.0433068	0.494733
WIPI1	83.9408	66.3095	75.1252	135.553	63.2648	153.056	117.291	-1.56086	-0.642342	0.0433327	0.494733
SOX12	100.593	76.3564	88.4747	53.2661	70.4165	57.8585	60.5137	1.46597	0.551855	0.0433273	0.494733
NUP153	148.851	147.689	148.27	103.226	111.126	95.5338	103.295	1.43061	0.516634	0.043552	0.495543
CLU	129.48	156.397	142.938	70.899	137.257	68.6228	92.2597	1.54963	0.631923	0.0434558	0.495543
IFIT2	6.79683	8.70731	7.75207	4.22455	3.57584	3.02748	3.60929	2.06935	1.04918	0.043478	0.495543
ERCC2	25.4881	35.499	30.4936	53.8171	46.4859	41.3755	47.2262	-1.5627	-0.644045	0.043548	0.495543
KTN1	186.233	247.824	217.028	357.985	308.072	271.464	312.507	-1.44185	-0.527925	0.0436552	0.496294
FBN2	629.386	1526.79	1078.09	1453.25	1716.4	1889.48	1686.38	-1.56411	-0.645345	0.0437745	0.496383
IMPAD1	90.7376	118.219	104.478	154.288	126.255	179.967	153.503	-1.46717	-0.553037	0.0437715	0.496383
PCSK7	62.5308	80.7101	71.6205	120.308	106.45	84.7694	103.842	-1.45599	-0.542004	0.0437161	0.496383
CSNK1G3	63.5503	60.9512	62.2508	41.5108	33.5579	47.4305	40.8331	1.53197	0.615384	0.04396	0.498064
ZNF550	13.5937	13.061	13.3273	24.98	15.4036	27.5837	22.6558	-1.69694	-0.762934	0.044043	0.498582
TP53I11	3.73826	1.33959	2.53892	0.551028	0.825194	1.00916	0.795127	3.276	1.71193	0.0441514	0.499385
RXRA	111.808	97.12	104.464	65.0214	86.0952	65.5954	72.2373	1.44823	0.534294	0.0442441	0.499588
GPATCH1	10.1952	11.0516	10.6234	20.3881	17.6041	15.1374	17.7099	-1.71175	-0.775472	0.0442438	0.499588
SZT2	61.8511	80.0403	70.9457	102.308	92.4217	111.68	102.137	-1.43584	-0.521899	0.0444518	0.500242
LYPD6	0	0.669793	0.334897	2.38779	3.30077	0.336386	2.00832	-5.62816	-2.49266	0.0443862	0.500242
CENPE	9.17572	64.3002	36.7379	34.7148	117.453	77.7053	76.6242	-2.08334	-1.0589	0.044434	0.500242
PLXNB2	584.527	458.139	521.333	291.494	422.224	364.307	359.342	1.45196	0.538005	0.0444407	0.500242
SLC25A15	2.03905	3.01407	2.52656	4.22455	8.80206	5.38218	6.13627	-2.36608	-1.2425	0.0445179	0.500564
PLK1	8.83588	55.9277	32.3818	25.7147	100.949	77.7053	68.1229	-2.10074	-1.0709	0.0446882	0.501634
HAUS7	8.49603	12.0563	10.2762	17.8166	22.0052	13.7918	17.8712	-1.74894	-0.806484	0.044661	0.501634
LL22NC03-80A10.6	6.11714	6.02814	6.07264	12.3063	12.1028	9.41882	11.276	-1.89226	-0.920107	0.0447859	0.502309
TMEM176B	2.03905	1.33959	1.68932	0.183676	0.550129	0.672773	0.468859	3.82949	1.93715	0.0449756	0.503098
CSGALNACT1	10.8749	23.1079	16.9914	7.16337	6.05142	14.1282	9.11434	1.88801	0.916864	0.0450069	0.503098
RP11-468E2.2	0	0	0	2.20411	0	8.07327	3.4258	-98.2914	-6.61899	0.0449867	0.503098
FAM156B	50.9762	24.1126	37.5444	52.3477	55.0129	72.6595	60.0067	-1.5947	-0.673282	0.0449057	0.503098
SRM	74.7651	111.186	92.9754	146.023	146.609	115.381	136.004	-1.465	-0.550897	0.0452561	0.503822
POLR1B	12.2343	17.7495	14.9919	19.6533	25.0309	31.9567	25.547	-1.67774	-0.746516	0.0453238	0.503822
CCDC149	15.2929	11.0516	13.1722	29.7555	13.4782	26.2381	23.1573	-1.76297	-0.818011	0.0451269	0.503822
BLOC1S5-TXNDC5	0	0	0	0.367352	10.4525	0	3.6066	-104.02	-6.70071	0.0453382	0.503822
C6orf1	9.51556	8.70731	9.11144	16.8982	17.8792	12.1099	15.6291	-1.75284	-0.80969	0.0452048	0.503822
NFKB2	42.4802	37.1735	39.8268	82.1032	34.108	74.3414	63.5175	-1.59605	-0.674507	0.0453734	0.503822
CLCN7	98.2142	140.657	119.435	226.289	159.812	144.646	176.916	-1.48389	-0.569381	0.0453077	0.503822
LGALS3BP	67.9683	75.3517	71.66	50.5109	54.4628	39.6936	48.2224	1.4706	0.556403	0.0452687	0.503822
FRMD4A	29.906	36.1688	33.0374	45.1843	66.0155	42.0483	51.0827	-1.54499	-0.627594	0.0454778	0.504561
LYSMD3	22.7694	27.4615	25.1154	45.5517	19.5296	70.9775	45.3529	-1.80164	-0.849312	0.0455994	0.504657
DTWD2	0.339841	1.67448	1.00716	2.93882	2.47558	5.0458	3.48673	-3.20863	-1.68196	0.0455913	0.504657
JAG1_1	60.4918	32.1501	46.3209	33.6127	25.0309	27.2473	28.6303	1.60951	0.686618	0.0455997	0.504657
TACC3	13.5937	93.4362	53.5149	55.4702	156.237	111.68	107.796	-2.01273	-1.00915	0.0458673	0.505106
SPP1	1.35937	5.02345	3.19141	0.734705	1.92545	0	0.886719	3.43902	1.782	0.0458998	0.505106
MAML3	9.17572	8.70731	8.94151	12.6737	19.5296	16.1465	16.1166	-1.76737	-0.821602	0.0457946	0.505106
MKI67	10.8749	236.437	123.656	138.124	595.24	226.724	320.03	-2.58744	-1.37153	0.0458626	0.505106
SCARB1	16.6522	18.7542	17.7032	29.7555	29.707	24.2198	27.8941	-1.59837	-0.676603	0.0456944	0.505106
KPNA2	47.238	173.142	110.19	99.0014	298.72	207.214	201.645	-1.82907	-0.871107	0.045905	0.505106
RANBP1	50.6364	91.0919	70.8641	107.634	118.828	90.488	105.65	-1.49154	-0.576806	0.045786	0.505106
ADAM32	5.09762	5.02345	5.06054	3.12249	0.275065	2.01832	1.80529	2.64257	1.40194	0.0459629	0.505286
ZNF845	18.6913	14.0657	16.3785	8.63278	8.527	12.1099	9.75656	1.72543	0.786955	0.045997	0.505286
EVA1A	4.0781	9.04221	6.56015	8.63278	20.0797	11.1008	13.2711	-2.00625	-1.0045	0.0463086	0.508045
PALLD	306.877	308.44	307.658	225.922	179.617	239.844	215.127	1.43056	0.516581	0.0463622	0.508045
TROAP	3.39841	26.1219	14.7602	13.4084	48.6864	35.9933	32.696	-2.20868	-1.14318	0.0463471	0.508045
MT1E	64.23	69.3236	66.7768	33.0617	54.1877	45.7486	44.3327	1.51751	0.60171	0.0464356	0.508431
CTD-3074O7.11	23.4491	0	11.7245	6.61234	0	0	2.20411	5.20934	2.3811	0.0465348	0.508609
DOCK9	3.73826	13.7308	8.73451	22.2248	13.7532	14.4646	16.8142	-1.92939	-0.948144	0.0465029	0.508609
PELP1	38.0622	48.2251	43.1437	63.5519	67.9409	56.5129	62.6686	-1.46004	-0.546007	0.046566	0.508609
MON1A	10.1952	12.3912	11.2932	20.5717	19.2545	16.1465	18.6576	-1.6838	-0.751723	0.0466436	0.509041
JMJD4	4.41794	9.04221	6.73007	13.9594	11.0026	12.4463	12.4694	-1.87507	-0.906941	0.0466835	0.50906
DCAF7	77.144	102.478	89.8112	116.451	138.633	136.573	130.552	-1.44828	-0.534339	0.0467593	0.50947
PILRB	15.9725	20.0938	18.0332	27.0004	21.455	43.3939	30.6164	-1.68458	-0.752388	0.0470022	0.511699
FNDC3B	164.823	151.038	157.931	267.065	163.113	270.455	233.544	-1.47894	-0.564564	0.0472367	0.51307
TRAM2	476.118	335.232	405.675	245.575	305.322	288.62	279.839	1.45085	0.536895	0.0471769	0.51307
HIVEP2	36.363	23.1079	29.7354	86.1441	34.108	34.3114	51.5212	-1.73849	-0.797839	0.0472695	0.51307
PSD	8.83588	4.68855	6.76221	3.12249	3.02571	3.36386	3.17069	2.12767	1.08927	0.0472817	0.51307
COL16A1	115.206	124.247	119.726	132.063	217.301	176.266	175.21	-1.46074	-0.546699	0.0476281	0.514993
BHLHE40	25.4881	7.36773	16.4279	46.2864	10.4525	45.4122	34.0503	-2.07161	-1.05075	0.0476199	0.514993
PYGL	82.5815	63.2955	72.9385	47.9395	57.7636	43.7302	49.8111	1.46163	0.547578	0.0475232	0.514993
ANPEP	211.721	197.589	204.655	134.635	182.368	96.5429	137.848	1.48305	0.56857	0.0475682	0.514993
ALDOA	1227.85	1056.93	1142.39	888.074	801.813	717.849	802.579	1.42193	0.507852	0.0476517	0.514993
FRMD8	51.316	36.1688	43.7424	23.5105	35.2083	23.5471	27.422	1.59729	0.675623	0.0477296	0.515002
CACNG8	0.339841	0.334897	0.337369	2.20411	1.92545	1.00916	1.71291	-4.99334	-2.32001	0.0476967	0.515002
TMEM201	4.75778	14.7355	9.74662	24.98	18.4293	11.7735	18.3943	-1.89504	-0.922231	0.0479312	0.515182
FARSB	23.7889	35.8339	29.8114	35.6332	51.162	56.1765	47.6572	-1.58683	-0.666144	0.0479392	0.515182
B4GALT1	180.796	160.081	170.438	116.083	124.329	119.417	119.943	1.42455	0.510503	0.0478779	0.515182
PCMTD2	39.7614	39.1829	39.4722	20.2044	27.7815	29.602	25.8626	1.56112	0.642582	0.0478978	0.515182
SGSM3	67.9683	58.6069	63.2876	101.573	82.5194	88.1332	90.7418	-1.44406	-0.530126	0.0478232	0.515182
OGFOD1	40.4411	55.2579	47.8495	72.3684	60.7893	78.0417	70.3998	-1.46845	-0.554298	0.0481345	0.516866
SPAG4	5.7773	5.69324	5.73527	1.28573	3.57584	3.36386	2.74181	2.2829	1.19087	0.0482254	0.517426
NCOA7	86.9994	118.888	102.944	96.6136	47.3111	55.5038	66.4762	1.54255	0.625318	0.0482841	0.51764
ALDH3B1	101.952	41.5272	71.7398	43.1639	53.0875	40.7028	45.6514	1.57059	0.651307	0.0483472	0.517824
SNHG17	8.49603	8.37242	8.43423	23.8779	9.62726	13.1191	15.5414	-1.86325	-0.897824	0.0483788	0.517824
PARD6G	15.2929	7.36773	11.3303	5.87764	6.60155	5.38218	5.95379	1.89047	0.918744	0.048645	0.520256
IL12A	3.73826	2.00938	2.87382	0.367352	1.37532	1.34555	1.02941	3.06237	1.61465	0.0487855	0.521277
SEMA5A	54.0348	139.317	96.6759	151.533	166.139	135.564	151.079	-1.56258	-0.643934	0.0488185	0.521277
TOMM40	37.0427	55.2579	46.1503	83.2053	62.9898	59.5404	68.5785	-1.49245	-0.577686	0.0488776	0.521492
LARP4	37.3826	37.1735	37.278	63.7356	45.1106	61.8951	56.9138	-1.53037	-0.613876	0.0491279	0.523744
HTRA3	110.448	89.7523	100.1	51.4293	97.6479	43.0575	64.0449	1.56247	0.643832	0.0492942	0.525097
PTGER2	140.015	102.143	121.079	47.5721	69.8664	117.062	78.167	1.55355	0.635564	0.0493712	0.525345
ZNF493	11.2148	7.70262	9.45869	2.93882	5.50129	6.05496	4.83169	2.05267	1.0375	0.0493962	0.525345
GPR126	3.39841	10.0469	6.72266	18.9186	18.4293	5.0458	14.1313	-2.1079	-1.07581	0.0495972	0.527064
ERMAP	35.6833	32.8199	34.2516	20.5717	22.2802	23.2107	22.0209	1.5726	0.653154	0.0503129	0.527535
FAM69A	12.5741	9.37711	10.9756	3.67352	6.32648	8.07327	6.02443	1.90509	0.929856	0.0502484	0.527535
HSPE1-MOB4	23.4491	18.7542	21.1016	9.91851	14.5784	14.801	13.0993	1.65873	0.730083	0.0499481	0.527535
ACAD9	14.6132	33.4897	24.0514	40.2251	37.9589	39.0208	39.0683	-1.6231	-0.698753	0.0502841	0.527535
EZR	69.3276	94.106	81.7168	108.736	157.062	91.1607	118.986	-1.45634	-0.542348	0.0497309	0.527535
TMEM140	16.6522	17.0797	16.866	10.1022	7.42674	12.4463	9.99174	1.70554	0.770232	0.0501984	0.527535
ENTPD4	78.1635	96.1153	87.1394	114.981	116.902	138.255	123.38	-1.40824	-0.493893	0.0498612	0.527535
RP11-464F9.1	0	0	0	1.65309	0	7.73689	3.12999	-89.7551	-6.48792	0.0499295	0.527535
NOLC1	58.1129	64.97	61.5414	105.246	78.9435	81.0691	88.4197	-1.44599	-0.532058	0.0499181	0.527535
UBE2L6	38.4021	19.424	28.913	12.3063	20.0797	19.8468	17.4109	1.67372	0.743054	0.0503002	0.527535
ARNTL2	6.11714	19.7589	12.938	25.8983	26.4062	17.1557	23.1534	-1.79155	-0.841211	0.0501815	0.527535
MAP3K12	63.5503	35.499	49.5247	30.6739	32.1825	30.9476	31.268	1.58319	0.662835	0.0500103	0.527535
PELI2	35.6833	34.8293	35.2563	24.2452	21.7301	20.5196	22.165	1.5637	0.644968	0.0497497	0.527535
CSPG4P12	13.9335	10.7167	12.3251	6.79602	6.32648	7.4005	6.841	1.80568	0.852538	0.0498487	0.527535
TCEA2	33.6443	16.4099	25.0271	15.4288	13.7532	15.8102	14.9974	1.6663	0.736647	0.0502342	0.527535
MAGT1	63.8902	101.809	82.8494	114.43	105.625	137.918	119.324	-1.43774	-0.523805	0.0500339	0.527535
TMEM185A	42.82	32.485	37.6525	24.4289	26.4062	21.1923	24.0092	1.55385	0.635849	0.0501917	0.527535
PBX2	109.089	81.045	95.067	55.6539	76.743	64.2498	65.5489	1.4548	0.54082	0.0505419	0.527587
RASSF7	3.05857	4.68855	3.87356	12.1226	8.527	4.03664	8.22875	-2.16231	-1.11257	0.0505127	0.527587
SMG1P1	26.5076	13.7308	20.1192	48.4905	17.6041	39.6936	35.2627	-1.75503	-0.811497	0.0505548	0.527587
RP11-252A24.2	5.43746	4.68855	5.06301	9.73484	10.7275	8.07327	9.51188	-1.89506	-0.922243	0.0505393	0.527587
TMEM91	11.5546	2.34428	6.94944	1.28573	4.40103	2.69109	2.79262	2.50714	1.32604	0.05046	0.527587
QPCTL	10.8749	12.0563	11.4656	24.4289	17.3291	15.1374	18.9651	-1.68794	-0.755261	0.0504821	0.527587
TM2D2	68.3081	68.6538	68.481	40.4087	56.3882	47.0941	47.9637	1.43992	0.525993	0.0507238	0.528937
SRP68	101.952	101.474	101.713	185.513	114.977	142.628	147.706	-1.45556	-0.541579	0.0508574	0.529917
PAPD7	33.9841	43.8715	38.9278	66.8581	58.0386	49.4488	58.1152	-1.5057	-0.590435	0.0509179	0.530133
EBNA1BP2	40.1013	43.5366	41.8189	64.2866	66.5656	52.1399	60.9974	-1.47394	-0.559673	0.0510946	0.53032
TFRC	112.148	239.786	175.967	233.636	248.383	321.585	267.868	-1.52136	-0.605358	0.0510577	0.53032
SUGP2	87.3392	106.832	97.0856	130.043	168.064	122.108	140.072	-1.44256	-0.528636	0.0509843	0.53032
TOP1	123.023	126.256	124.639	197.819	168.064	160.12	175.335	-1.41468	-0.500473	0.0510318	0.53032
CTD-3088G3.8	0.679683	4.68855	2.68412	1.46941	0.275065	0	0.581491	4.04016	2.01441	0.0511813	0.530807
ECT2	16.9921	55.2579	36.125	40.2251	70.1415	76.3597	62.2421	-1.7193	-0.781818	0.0513537	0.531472
TRAF4	51.316	30.4756	40.8958	27.5514	26.9563	22.8743	25.794	1.57587	0.656146	0.0513648	0.531472
FAM211B	14.953	10.0469	12.5	6.79602	6.87661	7.06412	6.91225	1.80843	0.854741	0.0513331	0.531472
PSG4	4.75778	15.4052	10.0815	38.9393	35.2083	2.01832	25.3886	-2.51735	-1.33191	0.0514393	0.531831
PSMA5	49.277	58.6069	53.942	83.94	65.4654	84.433	77.9461	-1.44603	-0.532102	0.0516188	0.533275
URB2	12.5741	9.37711	10.9756	20.5717	16.2288	17.8285	18.2097	-1.6901	-0.75711	0.0517359	0.533659
FST	204.585	213.999	209.292	186.064	139.733	101.252	142.35	1.46584	0.551725	0.0517067	0.533659
PDK1	42.4802	35.499	38.9896	27.0004	21.18	27.5837	25.2547	1.53538	0.618592	0.0518515	0.534439
BMPR1B	3.39841	9.04221	6.22031	3.12249	1.65039	3.36386	2.71225	2.27459	1.18561	0.0519703	0.53525
R3HDM1	25.4881	44.2064	34.8472	56.3886	51.162	54.1582	53.9029	-1.54697	-0.629448	0.052112	0.535884
RGS20	26.1678	19.0891	22.6284	10.6532	17.3291	15.1374	14.3732	1.60136	0.679302	0.0521022	0.535884
TMF1	93.4564	72.3377	82.897	131.696	86.9204	137.582	118.733	-1.43236	-0.518394	0.0523131	0.537538
SLC41A1	89.3783	96.4502	92.9143	83.0216	54.1877	51.8035	63.0043	1.46399	0.549902	0.0524198	0.537837
DOK1	27.1873	26.7917	26.9895	11.0206	18.9795	20.1832	16.7277	1.64772	0.720474	0.052504	0.537837
SLC25A4	9.17572	13.3959	11.2858	19.286	20.6298	16.1465	18.6875	-1.67066	-0.740422	0.0524784	0.537837
SLC2A3	56.4137	61.9559	59.1848	120.492	67.9409	75.6869	88.0398	-1.49302	-0.578233	0.0525436	0.537837
PTGES3	264.057	299.063	281.56	144.002	168.064	262.045	191.371	1.47404	0.559779	0.0525022	0.537837
PRRC2C	279.01	291.025	285.017	523.661	442.029	288.62	418.103	-1.46824	-0.554088	0.0527805	0.538847
DSTYK	117.245	97.4549	107.35	74.5725	78.1183	76.0233	76.2381	1.41039	0.496092	0.0528036	0.538847
PLEKHA2	49.277	40.8574	45.0672	24.4289	36.8586	26.5745	29.2874	1.54644	0.628955	0.0527664	0.538847
RAVER1	54.7145	72.6726	63.6935	100.471	95.7225	78.7144	91.6359	-1.44512	-0.531194	0.0527976	0.538847
SIX4	21.41	20.7636	21.0868	41.5108	26.1311	31.2839	32.9753	-1.57978	-0.659725	0.0528951	0.539276
SIPA1L1	74.0854	112.525	93.3053	188.635	100.399	132.536	140.523	-1.50792	-0.592557	0.0529264	0.539276
TRIM38	57.0934	46.2157	51.6545	29.2045	31.9075	42.0483	34.3868	1.52273	0.606659	0.0531208	0.540433
ADAM33	54.7145	18.7542	36.7343	23.1432	24.7558	14.801	20.9	1.75045	0.807727	0.0531147	0.540433
SNHG12	25.4881	17.4146	21.4514	57.307	21.18	31.2839	36.5903	-1.71296	-0.776492	0.0533752	0.54055
ILF2	119.624	143.671	131.647	206.085	166.689	185.685	186.153	-1.41709	-0.502931	0.0532439	0.54055
HNRNPLL	27.5272	36.5037	32.0154	47.3884	41.8098	59.204	49.4674	-1.53491	-0.61815	0.0533496	0.54055
RP11-313P13.3	1.01952	0	0.509762	2.93882	1.10026	2.35471	2.13126	-4.15249	-2.05398	0.0531889	0.54055
TMEM80	23.1092	19.0891	21.0992	12.3063	11.5527	15.8102	13.2231	1.62587	0.701213	0.053351	0.54055
MYO19	39.7614	45.5459	42.6537	88.1645	59.9641	44.403	64.1772	-1.51235	-0.596793	0.053327	0.54055
CELSR3	7.13667	4.01876	5.57771	11.0206	6.05142	16.8193	11.2971	-2.00545	-1.00392	0.0534729	0.540896
BICD1	14.2733	23.7777	19.0255	41.1435	23.6555	29.602	31.467	-1.66239	-0.733257	0.0534903	0.540896
TUBG1	25.8279	55.5928	40.7104	56.9396	80.0438	52.4763	63.1532	-1.55046	-0.632699	0.0535413	0.541002
PGP	11.8944	29.8058	20.8501	32.6944	40.9846	30.2748	34.6512	-1.66026	-0.731405	0.0536872	0.542067
CTSF	8.83588	9.37711	9.10649	4.22455	4.95116	5.0458	4.7405	1.95255	0.965356	0.0537962	0.542757
ABHD13	20.0506	19.0891	19.5699	10.1022	11.5527	15.1374	12.2641	1.65582	0.727543	0.0538429	0.542818
CHMP5	84.2807	72.3377	78.3092	53.8171	56.9384	55.1674	55.3076	1.41935	0.505228	0.0538977	0.542961
LINC00847	12.5741	8.03752	10.3058	4.22455	7.15168	5.38218	5.58614	1.8859	0.915251	0.0539398	0.542975
KIF18B	0.339841	26.1219	13.2309	16.3472	56.1132	30.9476	34.4693	-2.59946	-1.37821	0.0540416	0.54359
ANAPC16	43.1599	44.2064	43.6831	25.7147	28.0566	34.6478	29.473	1.52098	0.605001	0.0541175	0.543944
PHLDB2	19.371	11.0516	15.2113	6.97969	11.5527	6.72773	8.42004	1.80858	0.854854	0.0542912	0.54528
RPL9	313.674	266.243	289.958	207.738	177.692	229.416	204.948	1.41607	0.501893	0.0546415	0.546267
GSTCD	7.13667	18.7542	12.9454	19.6533	25.3059	21.8651	22.2748	-1.71321	-0.776701	0.0547151	0.546267
PELO	61.1714	76.0215	68.5965	99.3688	77.5682	121.772	99.5696	-1.44838	-0.534439	0.0546511	0.546267
PRDM1	25.1483	16.075	20.6117	13.9594	7.15168	14.4646	11.8586	1.73181	0.792284	0.05447	0.546267
TNFRSF10A	13.2538	6.36304	9.80842	3.8572	7.15168	3.36386	4.79091	2.04264	1.03043	0.054705	0.546267
QSOX2	28.8865	52.9137	40.9001	65.5724	60.7893	58.5312	61.631	-1.50805	-0.592683	0.0548803	0.546267
DNAJC1	43.4997	58.272	50.8859	96.43	49.2365	83.7602	76.4756	-1.50454	-0.589326	0.0545977	0.546267
MTG1	27.5272	22.1032	24.8152	36.5516	44.5605	33.3023	38.1381	-1.53928	-0.622259	0.0548487	0.546267
TENC1	123.023	80.3752	101.699	41.8782	88.5708	69.2956	66.5815	1.53092	0.6144	0.0547756	0.546267
EPB41L3	49.277	115.874	82.5756	182.574	130.106	84.433	132.371	-1.60445	-0.682078	0.054872	0.546267
MEF2BNB	5.7773	5.69324	5.73527	10.8369	12.1028	8.07327	10.3377	-1.83106	-0.872681	0.0548571	0.546267
TAZ	17.6718	20.4287	19.0502	31.5923	32.7327	24.8926	29.7392	-1.58501	-0.664487	0.0546145	0.546267
NXT1	7.13667	8.37242	7.75454	13.041	13.2031	14.801	13.6817	-1.74063	-0.799614	0.0550123	0.547174
ITGB3BP	12.2343	23.4428	17.8385	5.51028	7.42674	16.1465	9.69453	1.86859	0.901947	0.0552574	0.54798
SLC4A4	3.39841	10.7167	7.05755	16.7145	11.8278	11.4371	13.3265	-1.89682	-0.923581	0.0552203	0.54798
CDH2	72.7261	183.188	127.957	253.473	196.671	151.038	200.394	-1.56679	-0.647811	0.0552235	0.54798
CNN1	2.71873	6.02814	4.37344	9.55116	12.653	4.70941	8.97118	-2.06021	-1.04279	0.0551934	0.54798
CLCC1	22.0897	46.5506	34.3202	49.2252	52.5373	61.2223	54.3283	-1.57852	-0.65857	0.0553682	0.547999
BACH2	3.73826	1.67448	2.70637	0.918381	0.825194	1.00916	0.917578	2.88586	1.529	0.0554525	0.547999
TG	4.75778	4.01876	4.38827	1.46941	1.92545	2.35471	1.91652	2.37579	1.24841	0.0553374	0.547999
NFIB	0	0	0	4.5919	3.30077	0	2.63089	-77.1855	-6.27026	0.0554645	0.547999
MTFP1	3.73826	5.02345	4.38085	6.97969	9.35219	10.428	8.91996	-1.94405	-0.959067	0.0554505	0.547999
GTF2H2	3.39841	9.712	6.55521	9.36748	17.6041	11.4371	12.8029	-1.93689	-0.953744	0.0555945	0.548636
EPM2A	4.75778	3.68386	4.22082	7.7144	5.50129	13.1191	8.77825	-2.03517	-1.02515	0.0556933	0.548636
KMT2C	78.8432	89.4174	84.1303	171.002	101.499	95.1974	122.566	-1.46094	-0.546894	0.055666	0.548636
RAD52	10.1952	5.69324	7.94424	12.6737	14.5784	15.4738	14.2419	-1.75691	-0.813039	0.0556889	0.548636
GLB1L	2.37889	0.669793	1.52434	4.04087	4.40103	3.36386	3.93526	-2.5862	-1.37083	0.0558936	0.54963
RP11-3P17.5	3.39841	0	1.69921	6.24499	2.20052	6.05496	4.83349	-2.81769	-1.49451	0.0558356	0.54963
SLC4A11	8.49603	3.34897	5.9225	1.83676	4.12597	1.68193	2.54822	2.32003	1.21415	0.0559176	0.54963
SPTBN2	0	0.669793	0.334897	3.67352	1.10026	0.672773	1.81552	-5.22265	-2.38478	0.0560818	0.55003
ANGEL1	7.47651	11.3865	9.4315	14.6941	18.1543	15.8102	16.2195	-1.69437	-0.760745	0.0560281	0.55003
ZNF548	18.3514	11.0516	14.7015	6.79602	7.70181	10.7644	8.42073	1.78743	0.837887	0.0560441	0.55003
STRIP2	2.37889	6.69793	4.53841	11.0206	12.3779	4.70941	9.36929	-2.0746	-1.05283	0.0561268	0.550067
KIAA0430	132.878	123.912	128.395	76.9603	100.399	100.916	92.7583	1.39443	0.479678	0.0562605	0.550973
KLF3	62.5308	50.2345	56.3827	40.7761	34.108	38.6844	37.8562	1.47735	0.563014	0.0563479	0.551425
MAN2A2	20.7303	45.211	32.9707	61.5315	55.563	40.03	52.3748	-1.59161	-0.670489	0.0565088	0.552595
PAPPA	1145.95	695.58	920.763	296.086	308.347	990.322	531.585	1.73252	0.792871	0.0565665	0.552755
RP3-510D11.2	2.71873	1.00469	1.86171	0.183676	0.825194	0.672773	0.560548	3.54933	1.82755	0.0566914	0.552762
ANKRD23	1.01952	0	0.509762	2.93882	1.65039	1.34555	1.97825	-4.02144	-2.00771	0.0566229	0.552762
TEX2	21.0702	24.7824	22.9263	35.6332	38.7841	30.6112	35.0095	-1.53858	-0.621596	0.0566674	0.552762
LRRC15	2.71873	2.00938	2.36406	0.551028	1.37532	0.336386	0.754246	3.06668	1.61668	0.0567774	0.55296
WDR7	11.8944	25.4521	18.6733	31.9596	25.3059	35.657	30.9742	-1.65433	-0.726248	0.0567945	0.55296
C4orf32	10.5351	12.7261	11.6306	7.34705	5.22623	6.72773	6.43367	1.77264	0.825899	0.0568546	0.553142
RANBP2	162.444	181.849	172.147	254.391	213.725	256.663	241.593	-1.4037	-0.489238	0.0571809	0.553348
PLCD4	17.3319	6.02814	11.68	6.06131	7.97687	3.70025	5.91281	1.95315	0.965802	0.0571385	0.553348
RP11-379B18.5	6.11714	2.34428	4.23071	0.734705	2.47558	1.68193	1.63074	2.67812	1.42122	0.0573165	0.553348
ISY1-RAB43	45.8786	44.5413	45.2099	43.3476	19.2545	18.8376	27.1466	1.64916	0.72173	0.0571417	0.553348
RNF44	45.8786	46.8855	46.3821	40.2251	26.9563	20.1832	29.1215	1.57171	0.652339	0.0571375	0.553348
VKORC1L1	41.4606	59.6116	50.5361	70.7153	71.7918	75.3506	72.6192	-1.43171	-0.517735	0.05707	0.553348
DUSP6	3.39841	6.69793	5.04817	7.89807	11.5527	10.0916	9.84746	-1.89534	-0.922459	0.0572667	0.553348
GCN1L1	187.253	221.367	204.31	306.555	292.669	258.345	285.856	-1.40258	-0.488087	0.057278	0.553348
VASN	389.118	227.395	308.257	267.616	193.92	162.811	208.116	1.47931	0.564928	0.0571564	0.553348
ZNF761	39.0818	28.1313	33.6065	20.3881	21.7301	22.5379	21.552	1.57069	0.651401	0.0573314	0.553348
ASPHD2	2.03905	3.68386	2.86146	5.32661	6.60155	7.06412	6.33076	-2.12902	-1.09019	0.0570821	0.553348
WDR46	39.7614	33.4897	36.6256	56.2049	48.4114	61.2223	55.2795	-1.50502	-0.589785	0.0574384	0.553455
CCDC171	2.03905	1.33959	1.68932	2.93882	3.8509	6.72773	4.50582	-2.51238	-1.32905	0.0574669	0.553455
RNF166	13.5937	14.0657	13.8297	27.1841	19.2545	19.174	21.8709	-1.61302	-0.689764	0.0574419	0.553455
C12orf44	39.0818	36.1688	37.6253	67.0418	39.8844	65.9317	57.6193	-1.53283	-0.6162	0.0575546	0.553901
GRWD1	22.0897	30.4756	26.2826	37.8373	45.3856	37.0025	40.0751	-1.52006	-0.604127	0.0576638	0.554281
UTP14A	21.0702	21.4334	21.2518	39.4904	25.8561	33.3023	32.8829	-1.56066	-0.642159	0.0576771	0.554281
POP1	13.2538	9.712	11.4829	14.8778	26.1311	17.1557	19.3882	-1.67707	-0.745945	0.0577869	0.554937
NPIPA1	199.147	195.245	197.196	178.717	117.728	113.699	136.714	1.43723	0.523287	0.0578892	0.555521
DUSP10	50.2965	25.1172	37.7069	28.8372	19.8046	21.1923	23.278	1.60874	0.685931	0.0579349	0.55556
TOMM7	108.07	63.9653	86.0174	60.7968	53.6376	62.9043	59.1129	1.45481	0.540826	0.0579776	0.55557
B3GNT8	3.73826	0.334897	2.03658	0.551028	0.275065	0.672773	0.499622	3.88779	1.95895	0.0580983	0.556328
SEC13	141.374	154.722	148.048	237.677	183.468	204.859	208.668	-1.41322	-0.498985	0.0583246	0.556545
EIF4G1	567.195	574.013	570.604	880.543	826.844	709.103	805.497	-1.4135	-0.499267	0.0582117	0.556545
EDNRA	8.49603	18.7542	13.6251	25.3473	15.1285	30.6112	23.6957	-1.73346	-0.793654	0.0581894	0.556545
POPDC3	47.238	59.2767	53.2573	33.7964	38.509	36.3297	36.2117	1.48423	0.569719	0.0583182	0.556545
TRAF3IP2	24.1287	14.0657	19.0972	9.18381	14.3034	10.0916	11.1929	1.7147	0.777956	0.0583293	0.556545
UBE2T	1.69921	14.7355	8.21733	10.1022	27.5065	15.4738	17.6941	-2.14402	-1.10032	0.0584332	0.557139
AKR1B10	10.1952	8.70731	9.45128	1.65309	8.527	2.35471	4.17826	2.27163	1.18372	0.0585662	0.558008
RNF139	39.7614	42.197	40.9792	17.6329	19.2545	39.6936	25.527	1.62062	0.696543	0.0588992	0.560161
AC135048.13	4.75778	2.67917	3.71848	0	0	3.02748	1.00916	3.75494	1.90879	0.058918	0.560161
AC084219.4	2.03905	2.00938	2.02421	5.14293	5.22623	3.36386	4.57767	-2.31233	-1.20935	0.0588422	0.560161
ZBTB26	12.914	13.3959	13.1549	5.69396	8.25194	9.41882	7.78824	1.77515	0.827941	0.0591583	0.561709
CAMKK1	36.0232	20.0938	28.0585	20.5717	16.7789	13.7918	17.0475	1.62513	0.700551	0.0591649	0.561709
EPS15	78.8432	90.757	84.8001	55.6539	64.9152	62.5679	61.0457	1.40551	0.491093	0.059393	0.562412
CAP2	4.41794	7.36773	5.89283	12.3063	8.80206	11.1008	10.7364	-1.84818	-0.886109	0.0593729	0.562412
INHBA	212.741	280.643	246.692	508.967	372.162	230.761	370.63	-1.50344	-0.588263	0.0593011	0.562412
DDX39A	47.238	87.7429	67.4904	115.716	97.923	84.7694	99.4694	-1.47591	-0.561607	0.0594073	0.562412
PDXK	121.663	124.916	123.29	199.84	154.586	163.147	172.524	-1.40506	-0.490627	0.0594519	0.562435
RP11-802E16.3	16.3124	4.68855	10.5005	3.30617	5.77636	6.39134	5.15796	2.05916	1.04206	0.0595101	0.562588
HNRNPDL	191.331	228.734	210.033	380.026	218.951	306.784	301.921	-1.43846	-0.524525	0.0596239	0.562892
MAPK10	4.0781	1.67448	2.87629	0.367352	1.65039	1.00916	1.00897	2.99014	1.58021	0.0596585	0.562892
TMEM155	14.953	17.0797	16.0164	7.53072	10.7275	11.7735	10.0106	1.67373	0.743067	0.0596687	0.562892
MR1	9.51556	10.3818	9.94868	5.14293	6.05142	5.38218	5.52551	1.81182	0.857437	0.0598172	0.563497
PTGR1	168.901	184.193	176.547	114.063	147.71	115.044	125.606	1.40714	0.492764	0.0598071	0.563497
CCDC12	11.8944	13.7308	12.8126	20.5717	24.2057	15.4738	20.0837	-1.58433	-0.66387	0.0599174	0.563645
CARS	191.331	182.519	186.925	159.798	120.478	115.381	131.886	1.40998	0.495678	0.0598967	0.563645
DIAPH3	8.49603	56.9324	32.7142	57.1233	67.3908	57.5221	60.6787	-1.85345	-0.890217	0.0599625	0.563673
EDEM2	22.4295	18.0844	20.257	29.0208	31.6324	35.3206	31.9913	-1.55193	-0.634059	0.0602346	0.565833
FOXQ1	1.69921	1.67448	1.68685	0.551028	0.275065	0.672773	0.499622	3.23355	1.69312	0.060759	0.567281
TIMM23B	0.339841	1.00469	0.672266	2.02044	1.10026	4.70941	2.61004	-3.60618	-1.85047	0.0606919	0.567281
UCP3	2.71873	3.01407	2.8664	0.918381	1.37532	1.00916	1.10095	2.60687	1.38232	0.0605445	0.567281
OAS3	1.35937	2.00938	1.68437	1.83676	4.12597	8.07327	4.67867	-2.65665	-1.40961	0.0606362	0.567281
PLEKHG3	1.01952	0.669793	0.844659	2.75514	3.02571	2.01832	2.59972	-3.06159	-1.61428	0.0607474	0.567281
CYP1A1	2.37889	2.67917	2.52903	11.0206	3.8509	3.02748	5.96632	-2.40185	-1.26415	0.0605121	0.567281
CTU2	9.51556	9.04221	9.27888	17.8166	13.4782	14.4646	15.2531	-1.68461	-0.752414	0.0605805	0.567281
C19orf48	29.906	39.1829	34.5445	60.7968	43.7353	49.7852	51.4391	-1.49836	-0.583389	0.060771	0.567281
SLC5A3_1	29.906	40.1876	35.0468	20.0207	28.3316	18.5013	22.2845	1.57334	0.653826	0.0606938	0.567281
MXD4	194.049	150.369	172.209	133.533	92.1466	132.873	119.517	1.4399	0.525965	0.0608235	0.567375
DCUN1D4	46.8981	48.56	47.7291	26.4494	30.2571	39.3572	32.0212	1.51999	0.604058	0.0608715	0.56741
SLC39A8	1.69921	1.67448	1.68685	0.551028	0.275065	0.672773	0.499622	3.23355	1.69312	0.0609123	0.56741
PPP2R5A	39.0818	33.4897	36.2857	22.2248	21.7301	28.9292	24.2947	1.52471	0.608532	0.0610222	0.568038
MARS2	3.73826	1.33959	2.53892	4.04087	5.77636	8.07327	5.9635	-2.25879	-1.17555	0.0612801	0.570042
ABCB6	76.1245	82.0497	79.0871	52.8987	66.0155	48.1033	55.6725	1.41881	0.504679	0.0614818	0.571345
HJURP	3.05857	36.5037	19.7812	22.4085	60.2391	43.0575	41.9017	-2.11441	-1.08025	0.0619763	0.571345
ABI3BP	206.284	126.926	166.605	126.92	138.357	53.1491	106.142	1.56741	0.648378	0.0619077	0.571345
ACSL1	30.2459	34.8293	32.5376	54.7355	42.0849	47.4305	48.0836	-1.49187	-0.577123	0.0618397	0.571345
F2RL1	2.71873	2.00938	2.36406	4.95926	5.77636	4.70941	5.14834	-2.16117	-1.11181	0.0619691	0.571345
AFAP1L1	10.1952	25.1172	17.6562	36.9189	28.6067	22.5379	29.3545	-1.66824	-0.738327	0.0619228	0.571345
UNC5B	294.303	209.645	251.974	172.656	118.003	223.024	171.227	1.47243	0.558203	0.061761	0.571345
DNHD1	14.6132	14.0657	14.3394	25.8983	18.9795	22.8743	22.584	-1.60037	-0.678403	0.0617447	0.571345
WDR66	21.7498	29.8058	25.7778	18.1839	16.2288	13.1191	15.8439	1.58977	0.668816	0.0619634	0.571345
PHKB	43.8395	58.9418	51.3907	66.6744	73.1672	82.0783	73.9733	-1.42857	-0.514571	0.0618675	0.571345
CTD-2132N18.3	0	1.00469	0.502345	2.02044	5.50129	0	2.50724	-4.73838	-2.24439	0.0615729	0.571345
PLIN4	6.11714	3.34897	4.73306	2.02044	2.20052	2.01832	2.07976	2.25611	1.17384	0.061812	0.571345
SFI1	14.6132	16.4099	15.5116	26.633	27.5065	18.8376	24.3257	-1.59583	-0.674304	0.0616801	0.571345
FAM3C2	7.81635	17.4146	12.6155	23.3269	21.18	16.8193	20.4421	-1.62877	-0.703782	0.062089	0.571989
SLC38A2	1245.18	1254.86	1250.02	1005.63	692.612	959.374	885.871	1.4108	0.496512	0.0621455	0.572116
CDK19	59.4722	56.5975	58.0349	36.3679	37.1337	47.4305	40.3107	1.46942	0.555251	0.0625768	0.574314
LINC00473	4.41794	5.35835	4.88814	3.12249	1.10026	1.34555	1.8561	2.33834	1.22548	0.0626805	0.574314
PSD3	58.1129	45.8808	51.9969	22.4085	29.4319	48.1033	33.3146	1.57379	0.654239	0.0628131	0.574314
PLAT	182.495	222.371	202.433	176.145	134.782	115.381	142.103	1.41959	0.505472	0.0625504	0.574314
DENND4C	44.5192	44.5413	44.5302	65.0214	56.6633	67.6137	63.0994	-1.4168	-0.502631	0.0626299	0.574314
LNX2	6.45699	8.70731	7.58215	15.2451	11.5527	12.1099	12.9692	-1.75349	-0.810228	0.0628142	0.574314
UTP14C	40.4411	40.8574	40.6493	68.6949	43.1851	69.2956	60.3919	-1.48655	-0.571965	0.0627399	0.574314
E2F4	45.5387	48.2251	46.8819	80.6338	59.9641	59.204	66.6006	-1.4329	-0.518939	0.0625469	0.574314
CBX2	1.69921	1.67448	1.68685	4.04087	4.40103	3.70025	4.04739	-2.38131	-1.25176	0.0628093	0.574314
ANGPTL4	110.448	206.631	158.54	193.227	331.728	193.422	239.459	-1.51004	-0.594583	0.0625373	0.574314
MARC2	2.03905	2.00938	2.02421	4.40823	3.8509	6.05496	4.77136	-2.27426	-1.1854	0.0629765	0.575404
ZIK1	13.9335	15.7401	14.8368	7.89807	11.5527	6.05496	8.50191	1.73359	0.793761	0.0630266	0.575468
TCFL5	19.0311	16.7448	17.888	10.1022	13.7532	8.40966	10.755	1.65538	0.72716	0.0630722	0.575491
DNMT1	61.5113	149.364	105.438	206.819	176.041	112.017	164.959	-1.56541	-0.646544	0.0631972	0.576238
METTL1	7.81635	7.36773	7.59204	15.9798	9.62726	14.1282	13.2451	-1.76624	-0.820681	0.0634087	0.577772
LAYN	69.6675	47.8902	58.7789	39.674	42.635	36.6661	39.6584	1.478	0.563648	0.063476	0.577991
AC096677.1	0.679683	2.00938	1.34453	4.40823	3.02571	3.02748	3.48714	-2.66021	-1.41154	0.0636385	0.578511
SMYD3	8.83588	11.0516	9.94373	16.8982	20.0797	12.7827	16.5869	-1.68619	-0.753765	0.063793	0.578511
OXTR	8.49603	6.69793	7.59698	12.1226	20.9049	8.40966	13.8124	-1.82006	-0.863984	0.0637871	0.578511
TRIM13	32.6248	27.4615	30.0431	14.3267	18.4293	25.9018	19.5526	1.56679	0.647814	0.0637754	0.578511
RP1-59D14.5	1.69921	2.34428	2.02174	0.551028	0.825194	0.672773	0.682998	2.94797	1.55972	0.063747	0.578511
LIN37	6.11714	9.04221	7.57968	19.4697	6.60155	16.1465	14.0726	-1.86118	-0.896218	0.0637623	0.578511
PRKAG2	16.6522	15.0703	15.8613	17.2656	26.9563	33.6386	25.9535	-1.61384	-0.690495	0.0638906	0.57896
ICAM5	20.0506	11.0516	15.5511	9.36748	6.05142	11.1008	8.83988	1.76206	0.817262	0.0639292	0.57896
CTTN	289.545	300.402	294.974	450.925	448.63	340.087	413.214	-1.40291	-0.488422	0.0640269	0.579452
SMOC1	228.034	268.922	248.478	199.656	165.314	167.52	177.497	1.39472	0.479977	0.0640721	0.579468
SNORA67_8	5.43746	8.37242	6.90494	21.8575	7.97687	9.41882	13.0844	-1.91507	-0.937401	0.0641596	0.579867
ID3	100.593	83.7242	92.1586	85.4094	61.6145	34.3114	60.4451	1.51772	0.601907	0.0643776	0.581051
AP1S1	76.8041	55.9277	66.3659	41.1435	54.1877	42.3847	45.9053	1.44808	0.534143	0.0643541	0.581051
NR2F1	120.984	98.1247	109.554	63.3683	94.6222	75.6869	77.8925	1.41075	0.496458	0.0647522	0.583643
KANK2	335.084	220.697	277.89	134.451	273.964	141.955	183.457	1.51497	0.599294	0.0647245	0.583643
PARG	9.51556	13.7308	11.6232	18.3676	20.3548	17.8285	18.8503	-1.61674	-0.693087	0.0648803	0.584404
CDC42EP3	39.0818	54.5882	46.835	60.0621	88.0206	57.8585	68.6471	-1.46446	-0.550369	0.065026	0.584682
COPG1	253.182	243.47	248.326	370.291	300.095	358.924	343.104	-1.38286	-0.467654	0.0650585	0.584682
FARS2	4.41794	8.03752	6.22773	12.1226	11.2776	10.0916	11.164	-1.81532	-0.860224	0.0650402	0.584682
OSBP2	1.35937	0.334897	0.847131	2.57147	3.30077	2.01832	2.63019	-3.06203	-1.61449	0.06513	0.584682
LINC00086	2.37889	3.34897	2.86393	0.183676	1.10026	2.01832	1.10075	2.96994	1.57043	0.065129	0.584682
SLC39A7	267.115	252.847	259.981	437.333	277.54	392.227	369.033	-1.42019	-0.506081	0.0653848	0.585999
DNMBP	123.362	112.86	118.111	79.7154	103.974	68.9592	84.2164	1.40055	0.485989	0.0654274	0.585999
ARL3	52.6754	43.8715	48.2734	29.3882	34.3831	33.975	32.5821	1.50264	0.587497	0.0654961	0.585999
UBC	1732.51	1913.93	1823.22	3703.09	1676.79	2716.99	2698.96	-1.48041	-0.565999	0.0654582	0.585999
TGFB1	160.065	106.162	133.114	107.083	103.424	65.9317	92.1464	1.44046	0.526525	0.0653946	0.585999
DARS2	16.3124	24.7824	20.5474	23.1432	40.9846	34.6478	32.9252	-1.59042	-0.669404	0.065642	0.586519
RP11-163E9.2	0.339841	0	0.169921	1.10206	0.550129	2.69109	1.44776	-6.89886	-2.78636	0.0656119	0.586519
CHML	36.7029	47.8902	42.2965	25.531	30.5322	28.9292	28.3308	1.51085	0.595361	0.0658461	0.586697
LPIN1	54.7145	50.2345	52.4745	78.0624	55.0129	95.8701	76.3151	-1.45144	-0.537483	0.0658432	0.586697
NKTR	145.452	131.949	138.701	198.003	193.095	180.976	190.691	-1.3818	-0.466545	0.0658816	0.586697
PLEKHG1	1.69921	2.00938	1.85429	0.551028	0.825194	0.336386	0.570869	3.07169	1.61903	0.0658197	0.586697
MESDC2	42.1403	43.8715	43.0059	60.9805	56.6633	66.2681	61.304	-1.41854	-0.504406	0.0658541	0.586697
STARD4	27.1873	39.8527	33.52	53.0824	26.1311	91.4971	56.9035	-1.69401	-0.760444	0.0659664	0.586892
TOP3A	20.0506	32.8199	26.4353	45.0007	37.6838	37.3389	40.0078	-1.52112	-0.605135	0.0661231	0.586892
ZNF816	10.1952	9.37711	9.78617	3.8572	6.60155	6.39134	5.6167	1.83456	0.875437	0.0661067	0.586892
UBE2C	9.17572	46.2157	27.6957	23.6942	79.4936	55.8401	53.0093	-1.91063	-0.934047	0.0660789	0.586892
TTLL12	29.2264	26.4568	27.8416	50.6946	37.4088	37.0025	41.702	-1.5169	-0.601126	0.0660311	0.586892
SOCS2	4.75778	6.02814	5.39296	9.55116	8.25194	11.7735	9.85887	-1.7941	-0.843258	0.066397	0.588932
MTDH	130.839	174.481	152.66	239.881	173.841	233.452	215.725	-1.41345	-0.499216	0.0665874	0.589859
PGK1	524.035	452.11	488.073	362.209	351.808	345.805	353.274	1.37939	0.464032	0.0665898	0.589859
RP11-417E7.1	3.39841	2.34428	2.87135	1.28573	0.550129	1.34555	1.06047	2.60755	1.38269	0.0667973	0.589944
LYNX1	17.6718	9.37711	13.5244	4.95926	5.77636	11.4371	7.39092	1.86869	0.90203	0.0667768	0.589944
EPS8L2	54.0348	16.075	35.0549	21.6738	26.4062	9.41882	19.1663	1.8215	0.865129	0.0667547	0.589944
PPP2R1B	74.0854	69.3236	71.7045	39.3067	62.9898	48.1033	50.1332	1.43735	0.523414	0.0668221	0.589944
SIN3A	126.081	113.195	119.638	99.5525	84.7199	73.3322	85.8682	1.38094	0.465653	0.0668645	0.589944
GUSBP11	19.371	16.4099	17.8904	34.7148	30.2571	19.174	28.0486	-1.58687	-0.666181	0.0667941	0.589944
NAV3	27.867	66.6444	47.2557	67.9602	103.149	51.1307	74.08	-1.5676	-0.64856	0.0671079	0.591311
NPTXR	16.9921	10.0469	13.5195	7.7144	8.25194	7.4005	7.78895	1.72763	0.788796	0.0670944	0.591311
SLC25A37	28.5467	23.1079	25.8273	33.9801	45.3856	39.0208	39.4622	-1.51445	-0.598793	0.0672024	0.591524
ATHL1	21.0702	19.424	20.2471	43.3476	33.5579	19.5104	32.1386	-1.60095	-0.678926	0.0672207	0.591524
GRAMD1B	5.09762	5.02345	5.06054	11.5716	8.80206	6.72773	9.0338	-1.85476	-0.891236	0.0673191	0.592001
NBPF20	9.51556	12.0563	10.7859	16.5309	17.3291	19.8468	17.9022	-1.62923	-0.704193	0.0674933	0.593021
SCYL1	116.566	121.233	118.899	210.677	128.18	169.202	169.353	-1.42671	-0.512694	0.0675239	0.593021
CHCHD3	33.9841	45.211	39.5976	72.1847	51.7121	50.458	58.1183	-1.47725	-0.56291	0.06779	0.594186
BBS10	25.8279	13.3959	19.6119	5.51028	12.653	15.1374	11.1002	1.78971	0.839726	0.0677345	0.594186
ZNF808	13.9335	11.0516	12.4925	5.32661	8.25194	8.74605	7.44153	1.76092	0.816331	0.0677662	0.594186
RELN	2.71873	3.34897	3.03385	7.34705	9.90232	2.69109	6.64682	-2.20811	-1.14281	0.0678412	0.594245
SYTL2	7.47651	6.36304	6.91977	7.7144	16.2288	14.4646	12.8026	-1.81486	-0.859856	0.0679048	0.594343
GOLGA8O	7.13667	6.69793	6.9173	2.02044	5.22623	3.36386	3.53684	2.04403	1.03142	0.0680234	0.594343
ZNF787	23.1092	13.3959	18.2525	34.5311	21.7301	30.6112	28.9575	-1.59253	-0.671321	0.0680304	0.594343
SNAI1	27.1873	12.0563	19.6218	14.3267	9.62726	10.0916	11.3485	1.70834	0.772594	0.0680125	0.594343
SPTSSA	6.79683	12.0563	9.42655	15.2451	12.1028	21.5287	16.2922	-1.70782	-0.77216	0.0680775	0.594365
STON1	25.1483	22.773	23.9606	9.73484	19.8046	15.8102	15.1165	1.60885	0.68603	0.0682243	0.59487
CHURC1	84.2807	63.2955	73.7881	36.9189	50.6119	64.9226	50.8178	1.46176	0.54771	0.068188	0.59487
COPA	390.138	413.597	401.868	604.478	470.36	598.431	557.757	-1.38819	-0.473202	0.0686615	0.594877
PKP4	24.8084	47.8902	36.3493	57.6743	56.6633	51.8035	55.3804	-1.52421	-0.608059	0.0684619	0.594877
ZNF660	6.11714	6.69793	6.40754	1.83676	4.95116	3.02748	3.2718	2.04439	1.03167	0.06904	0.594877
ABHD14B	28.8865	15.4052	22.1459	13.2247	13.7532	14.801	13.9263	1.59477	0.673346	0.0683839	0.594877
RUFY3	71.7065	59.9465	65.8265	43.3476	51.162	47.4305	47.3134	1.40414	0.489684	0.0689459	0.594877
ZNF608	32.6248	28.4662	30.5455	14.3267	24.4807	21.1923	19.9999	1.55072	0.632936	0.0688623	0.594877
DIAPH1	75.1049	122.907	99.006	157.594	150.46	115.044	141.033	-1.42631	-0.512284	0.068287	0.594877
CDK14	14.6132	34.8293	24.7212	45.1843	28.8818	46.0849	40.0503	-1.61894	-0.695047	0.0687163	0.594877
PKIA	9.17572	17.7495	13.4626	5.51028	8.25194	9.41882	7.72701	1.78008	0.831943	0.0689413	0.594877
SPAG1	0	2.67917	1.33959	3.12249	4.95116	3.36386	3.81251	-2.75547	-1.4623	0.0686627	0.594877
KAZALD1	2.03905	0.334897	1.18697	1.65309	4.12597	5.0458	3.60828	-2.89691	-1.53452	0.0690613	0.594877
IFITM2	46.8981	34.4944	40.6962	28.6535	27.7815	23.5471	26.6607	1.50685	0.591532	0.0687915	0.594877
MAP1A	790.811	818.487	804.649	520.171	742.949	416.783	559.968	1.43671	0.522765	0.0690092	0.594877
STOML1	6.79683	7.03283	6.91483	13.9594	12.928	8.40966	11.7657	-1.75907	-0.814812	0.0687961	0.594877
CSPG4	193.03	282.988	238.009	586.478	442.304	147.001	391.928	-1.64719	-0.72001	0.0690485	0.594877
ATP2A3	3.05857	1.00469	2.03163	4.40823	2.20052	8.74605	5.11826	-2.4614	-1.29948	0.0686508	0.594877
LRRC45	9.17572	16.7448	12.9603	18.1839	28.0566	17.1557	21.1321	-1.62627	-0.701564	0.0690713	0.594877
NAPA	57.0934	64.97	61.0317	105.797	79.4936	73.6686	86.3199	-1.42316	-0.509098	0.0683949	0.594877
SAMHD1	10.1952	21.0985	15.6469	19.6533	29.4319	27.9201	25.6684	-1.62761	-0.702755	0.0689249	0.594877
SLC7A5	911.115	1096.45	1003.78	975.504	575.985	503.907	685.132	1.46435	0.550263	0.0691332	0.595027
KRT34	0.339841	0.334897	0.337369	1.65309	1.92545	1.00916	1.52923	-4.32635	-2.11315	0.0691825	0.595068
RP11-611O2.5	1.01952	0	0.509762	0.918381	0	7.4005	2.77296	-5.10919	-2.3531	0.0693824	0.596107
RP11-66N24.3	16.9921	9.37711	13.1846	7.7144	7.70181	6.72773	7.38131	1.76527	0.819886	0.069474	0.596107
MIR663A	1.01952	1.33959	1.17956	8.81645	0.550129	2.01832	3.79497	-3.21437	-1.68454	0.0694818	0.596107
MIAT	3.05857	0.669793	1.86418	0.734705	0	0.672773	0.469159	3.63051	1.86017	0.0693991	0.596107
TGFBR3	24.8084	30.1407	27.4746	15.7961	22.5553	14.4646	17.6054	1.56236	0.643729	0.0695717	0.596361
USP13	11.8944	26.1219	19.0082	26.082	34.9332	31.2839	30.7664	-1.61123	-0.688166	0.0696084	0.596361
RNF145	31.2654	37.1735	34.2195	52.8987	48.6864	46.7577	49.4476	-1.45976	-0.545727	0.0696454	0.596361
BAALC	13.9335	5.02345	9.47847	2.02044	3.57584	7.73689	4.44439	2.17938	1.12392	0.0697503	0.596534
EPS8	240.608	259.88	250.244	191.023	157.612	194.768	181.134	1.38108	0.4658	0.0697575	0.596534
PCDH19	2.03905	1.33959	1.68932	0.183676	0.550129	1.00916	0.580988	3.23242	1.69262	0.0697995	0.596534
MYO15A	2.71873	1.33959	2.02916	0.734705	0.550129	0.672773	0.652535	2.94847	1.55997	0.0698791	0.596832
GAL3ST4	6.45699	3.34897	4.90298	0.734705	3.30077	2.35471	2.13006	2.39099	1.25761	0.0699362	0.596938
APOLD1	2.03905	6.69793	4.36849	5.14293	11.8278	10.0916	9.02077	-2.03047	-1.02181	0.0700208	0.597278
COX20	31.6052	33.8246	32.7149	16.7145	26.4062	21.5287	21.5498	1.54127	0.624118	0.0702555	0.598361
RPN1	297.021	400.871	348.946	523.844	431.026	499.534	484.801	-1.3896	-0.474671	0.0702821	0.598361
FOXK2	55.3941	66.9793	61.1867	100.655	73.7173	84.0966	86.1561	-1.41442	-0.500211	0.0702177	0.598361
RP11-399J13.3	0	0	0	0	0	7.4005	2.46683	-70.9227	-6.14818	0.0703582	0.598627
TRAPPC12	42.1403	44.5413	43.3408	71.0827	56.9384	54.831	60.9507	-1.42249	-0.508419	0.0705139	0.59957
CCT6B	0.339841	0.334897	0.337369	2.02044	0.275065	3.02748	1.77433	-4.80348	-2.26408	0.0705951	0.599878
ASPHD1	1.69921	0.334897	1.01705	3.30617	2.75065	2.69109	2.91597	-2.8849	-1.52852	0.0709359	0.602391
PARP4	94.8157	128.265	111.541	135.553	187.594	150.365	157.837	-1.41314	-0.498907	0.0710251	0.602766
CD55	196.428	282.318	239.373	243.555	120.753	112.017	158.775	1.5052	0.589957	0.0713785	0.604204
HMMR	3.73826	32.1501	17.9442	12.49	44.0103	58.1949	38.2317	-2.12479	-1.08732	0.0713903	0.604204
RP11-574K11.29	1.01952	0.334897	0.67721	2.57147	1.92545	2.01832	2.17175	-3.20443	-1.68007	0.0714208	0.604204
COG3	48.2575	38.1782	43.2178	68.6949	44.0103	75.6869	62.7974	-1.45221	-0.538249	0.0713985	0.604204
UBE2A	96.1751	115.539	105.857	75.8582	80.869	73.3322	76.6865	1.37976	0.464421	0.0713555	0.604204
ABCB8	31.9451	41.5272	36.7361	54.7355	55.0129	50.7944	53.5142	-1.46258	-0.548512	0.0715255	0.604707
KLHL21	278.33	240.456	259.393	266.147	126.805	131.191	174.714	1.48221	0.567755	0.0727415	0.605039
DUSP12	16.3124	18.7542	17.5333	26.633	20.6298	34.3114	27.1914	-1.53762	-0.620698	0.0727629	0.605039
PPM1G	74.0854	80.7101	77.3978	124.349	103.424	91.1607	106.311	-1.38266	-0.467444	0.0721513	0.605039
FAM136A	18.6913	30.1407	24.416	36.7352	37.6838	37.0025	37.1405	-1.51614	-0.600407	0.0725535	0.605039
VAX2	0.679683	0.334897	0.50729	1.46941	2.47558	2.01832	1.98777	-3.5927	-1.84507	0.072833	0.605039
GPX1	179.096	108.841	143.969	95.6953	101.499	108.989	102.061	1.41198	0.497723	0.0725274	0.605039
MTRNR2L12	39.0818	18.0844	28.5831	19.4697	17.8792	16.4829	17.9439	1.58502	0.664504	0.0726214	0.605039
RP11-360F5.3	0	0.334897	0.167448	1.46941	1.10026	1.00916	1.19294	-6.2799	-2.65074	0.0720476	0.605039
PAIP1	96.5149	107.167	101.841	66.1234	78.6685	79.3872	74.7264	1.37902	0.463642	0.0717104	0.605039
HIST1H2BJ	4.75778	2.34428	3.55103	2.38779	0	1.00916	1.13232	2.90965	1.54084	0.0720679	0.605039
QRSL1	12.914	13.7308	13.3224	20.5717	20.3548	19.8468	20.2578	-1.52369	-0.607573	0.0718844	0.605039
KIAA1244	0	0	0	0.551028	1.10026	4.70941	2.12023	-59.6342	-5.89807	0.0721957	0.605039
ARHGEF39	1.01952	2.67917	1.84935	1.46941	7.15168	6.05496	4.89201	-2.56415	-1.35848	0.0724191	0.605039
C9orf9	5.7773	2.34428	4.06079	1.83676	1.65039	1.34555	1.6109	2.41806	1.27385	0.0717491	0.605039
BMS1P5	3.05857	5.35835	4.20846	6.24499	10.1774	8.74605	8.38947	-1.92931	-0.948082	0.0725095	0.605039
NTM	8.83588	27.1266	17.9813	32.878	23.1054	34.6478	30.2104	-1.67776	-0.746535	0.072499	0.605039
CALCOCO1	202.885	126.926	164.906	128.573	115.802	103.271	115.882	1.42019	0.506082	0.0718369	0.605039
LTA4H	118.265	98.7945	108.53	64.103	83.6196	88.4696	78.7307	1.38786	0.472862	0.0727019	0.605039
CDKN3	2.03905	9.712	5.87553	6.06131	13.7532	16.8193	12.2113	-2.05538	-1.0394	0.0721121	0.605039
KNSTRN	9.8554	28.4662	19.1608	22.7758	41.8098	32.6295	32.405	-1.6854	-0.75309	0.0724312	0.605039
KIF23	11.2148	69.3236	40.2692	38.2046	123.504	66.6045	76.1044	-1.8881	-0.916938	0.0721411	0.605039
FAM86A	5.43746	5.35835	5.3979	10.1022	8.25194	10.428	9.59403	-1.77755	-0.829892	0.072533	0.605039
NPIPB5	92.097	75.6866	83.8918	163.104	114.702	81.7419	119.849	-1.43259	-0.518626	0.0726488	0.605039
JUP	12.914	23.4428	18.1784	11.9389	12.3779	8.07327	10.7967	1.66133	0.732341	0.0716452	0.605039
C19orf82	2.37889	1.67448	2.02669	1.65309	5.22623	8.74605	5.20845	-2.48147	-1.3112	0.0719925	0.605039
MEIS3	35.6833	19.7589	27.7211	18.735	16.2288	18.1649	17.7095	1.55991	0.641465	0.0728201	0.605039
APCDD1L	185.893	214.334	200.114	109.471	198.872	104.953	137.765	1.45277	0.538806	0.0725169	0.605039
IKBKGP1	3.05857	4.01876	3.53867	0	3.02571	0	1.00857	3.4526	1.78768	0.0725264	0.605039
MARCKSL1	88.3588	59.6116	73.9852	43.5312	64.9152	45.0758	51.1741	1.44708	0.533146	0.0729578	0.605595
LCA5	18.6913	18.4193	18.5553	6.79602	13.7532	13.4555	11.3349	1.67691	0.745804	0.0729906	0.605595
AP4B1	12.914	15.4052	14.1596	19.6533	26.4062	21.1923	22.4173	-1.56254	-0.643894	0.0733308	0.606534
PBXIP1	81.5619	58.9418	70.2519	42.7965	55.8381	50.7944	49.8097	1.41735	0.5032	0.0732655	0.606534
NOM1	25.8279	28.1313	26.9796	43.7149	38.7841	34.9842	39.1611	-1.47946	-0.565074	0.0732717	0.606534
ZNF195	23.1092	18.4193	20.7643	10.2859	15.1285	15.1374	13.5173	1.5798	0.65974	0.0732763	0.606534
FAM64A	5.43746	17.0797	11.2586	10.2859	29.707	21.8651	20.6193	-1.82097	-0.864709	0.0733271	0.606534
DMTF1	119.624	105.158	112.391	76.5929	92.4217	77.7053	82.24	1.36997	0.454147	0.0734236	0.606926
ZC3H7B	106.71	109.511	108.111	155.206	161.188	129.172	148.522	-1.3804	-0.46509	0.0735888	0.607915
GPR89B	7.13667	6.02814	6.5824	10.4695	5.77636	22.2015	12.8158	-1.92513	-0.944956	0.0738796	0.608541
PTPN14	102.972	111.855	107.414	135.737	158.162	152.047	148.648	-1.37481	-0.459228	0.0738923	0.608541
NCEH1	15.6327	34.1595	24.8961	35.0821	53.6376	30.9476	39.8891	-1.60106	-0.679029	0.0737188	0.608541
COCH	0	1.00469	0.502345	2.57147	2.47558	0.672773	1.90661	-3.82364	-1.93495	0.073824	0.608541
HERC2P3	35.3435	34.4944	34.9189	48.1231	53.9126	49.4488	50.4949	-1.43899	-0.525054	0.0738422	0.608541
RANGAP1	100.253	187.207	143.73	247.595	216.751	164.157	209.501	-1.45863	-0.544616	0.0739602	0.608725
RBM6	84.2807	83.3893	83.835	118.287	128.455	94.861	113.868	-1.3638	-0.447628	0.0743015	0.609135
HMGCR	46.2184	63.2955	54.7569	74.7562	48.1363	130.518	84.4701	-1.53971	-0.622655	0.0741427	0.609135
LY96	6.45699	6.02814	6.24256	2.38779	3.02571	4.70941	3.3743	1.96724	0.976174	0.0741359	0.609135
MLLT3	44.5192	36.1688	40.344	27.5514	26.4062	27.9201	27.2926	1.47651	0.562189	0.0741689	0.609135
PTGES2	20.0506	30.8105	25.4306	44.6333	41.8098	29.9384	38.7938	-1.53555	-0.618756	0.0742388	0.609135
SLC25A22	12.914	14.4006	13.6573	18.735	24.7558	21.5287	21.6732	-1.55615	-0.637981	0.0743292	0.609135
CIT	13.9335	61.621	37.7772	36.3679	110.576	55.8401	67.5947	-1.78741	-0.837873	0.074249	0.609135
HEXIM2	6.45699	3.68386	5.07042	2.02044	1.65039	3.70025	2.45703	2.16007	1.11108	0.0744542	0.609785
SNHG3	56.4137	39.5178	47.9657	29.5719	35.4833	31.6203	32.2252	1.49376	0.57895	0.0746469	0.610989
MPI	17.6718	12.3912	15.0315	23.6942	20.6298	26.5745	23.6329	-1.56317	-0.644479	0.0746987	0.611038
CACYBP	107.39	104.153	105.771	84.1237	73.4422	69.9684	75.8448	1.37296	0.457291	0.0750415	0.611102
PCNXL2	30.2459	26.4568	28.3514	45.919	39.0592	38.0117	40.9966	-1.47305	-0.558808	0.075081	0.611102
EGFR	157.686	191.896	174.791	249.249	269.563	206.541	241.784	-1.38509	-0.469984	0.0748016	0.611102
KIAA1549L	7.47651	18.0844	12.7805	25.1636	24.4807	13.7918	21.1454	-1.66139	-0.732392	0.0750244	0.611102
FKBP11	47.5778	58.6069	53.0924	88.3482	55.563	81.7419	75.2177	-1.41879	-0.504657	0.0749686	0.611102
RP11-304L19.5	9.17572	3.34897	6.26234	2.57147	2.20052	4.37302	3.04834	2.09207	1.06493	0.0751182	0.611102
DUS3L	15.9725	13.061	14.5168	28.8372	20.6298	18.5013	22.6561	-1.58898	-0.668097	0.0750376	0.611102
ACOT9	45.8786	56.5975	51.2381	74.5725	70.6916	66.6045	70.6229	-1.38942	-0.474484	0.0750884	0.611102
PIN4	20.0506	12.3912	16.2209	6.97969	13.2031	9.08243	9.75507	1.68027	0.74869	0.0750066	0.611102
EXOC1	93.1165	67.6491	80.3828	48.1231	58.0386	66.9409	57.7009	1.40215	0.487645	0.0756431	0.612159
GUSBP3	2.71873	1.67448	2.19661	6.42866	4.40103	3.02748	4.61906	-2.20188	-1.13874	0.0754583	0.612159
TPD52L1	1.35937	2.00938	1.68437	0.551028	0	1.00916	0.520063	3.23335	1.69303	0.0754371	0.612159
DLC1	145.112	197.589	171.351	240.616	256.085	212.596	236.432	-1.38074	-0.465442	0.0756003	0.612159
BICC1	14.2733	19.7589	17.0161	25.7147	15.9537	42.7211	28.1298	-1.64404	-0.717246	0.075498	0.612159
RNF219	26.1678	28.4662	27.317	14.1431	20.3548	20.856	18.4513	1.52181	0.605786	0.0756606	0.612159
MYO16	1.01952	1.33959	1.17956	6.42866	3.8509	0.336386	3.53865	-3.00974	-1.58964	0.075485	0.612159
RCCD1	11.5546	13.7308	12.6427	13.4084	28.3316	19.5104	20.4168	-1.60029	-0.678329	0.0756367	0.612159
ZNF334	3.05857	2.34428	2.70142	0.918381	0.550129	1.68193	1.05015	2.65299	1.40762	0.0753214	0.612159
RP11-54O7.3	2.71873	1.33959	2.02916	0.918381	0.550129	0.336386	0.601632	2.94907	1.56026	0.0767105	0.612192
RP11-96L14.7	0	3.68386	1.84193	0.367352	0.825194	0	0.397515	4.26262	2.09174	0.0770133	0.612192
ST3GAL3	11.5546	14.7355	13.145	23.6942	18.4293	17.1557	19.7598	-1.5379	-0.620964	0.0771192	0.612192
ARHGEF2	284.787	277.294	281.041	238.779	208.774	156.42	201.324	1.39193	0.47709	0.0767	0.612192
PGBD2	12.5741	12.3912	12.4827	9.00013	4.95116	6.72773	6.89301	1.72834	0.789384	0.0774183	0.612192
PELI1	4.0781	4.35366	4.21588	12.3063	5.50129	6.39134	8.06631	-1.95595	-0.967868	0.0764389	0.612192
EAF2	0	0	0	1.65309	1.10026	3.02748	1.92694	-53.1961	-5.73325	0.0768131	0.612192
TBCCD1	8.83588	11.0516	9.94373	9.36748	18.9795	23.8834	17.4101	-1.72485	-0.786475	0.0771432	0.612192
PI4K2B	8.15619	20.4287	14.2924	20.3881	20.3548	30.6112	23.7847	-1.65299	-0.725075	0.0759416	0.612192
PXDC1	50.9762	49.5647	50.2705	107.267	43.1851	75.0142	75.1554	-1.49794	-0.582977	0.0771871	0.612192
ZNF192P1	3.05857	1.00469	2.03163	0.551028	0.550129	1.00916	0.703439	2.94789	1.55968	0.0774235	0.612192
TSPYL1	107.05	111.186	109.118	71.6337	94.6222	72.3231	79.5263	1.37467	0.459082	0.0765125	0.612192
SGK1	77.144	36.1688	56.6564	52.8987	31.0823	19.174	34.385	1.63905	0.712862	0.076454	0.612192
FBXO30	104.671	109.176	106.924	82.1032	58.0386	90.1516	76.7645	1.39381	0.479033	0.0774435	0.612192
AC004980.7	3.73826	2.34428	3.04127	7.53072	5.22623	5.0458	5.93425	-2.03494	-1.02499	0.0759163	0.612192
COL1A2	15238.5	12931	14084.8	7476.35	11376.9	11094	9982.44	1.41101	0.496729	0.0775083	0.612192
RINT1	21.7498	22.773	22.2614	35.8168	23.3805	43.7302	34.3092	-1.53579	-0.618985	0.0760866	0.612192
LONRF1	29.906	24.7824	27.3442	12.6737	21.18	20.1832	18.0123	1.54581	0.628365	0.0776126	0.612192
ANKRD16	3.39841	2.67917	3.03879	6.97969	4.95116	6.05496	5.99527	-2.00907	-1.00653	0.0765324	0.612192
TRDMT1	4.41794	2.34428	3.38111	5.14293	10.7275	5.38218	7.08421	-2.07321	-1.05187	0.076839	0.612192
ERCC6-PGBD3	7.13667	3.68386	5.41027	3.67352	2.75065	0	2.14139	2.41684	1.27312	0.0776812	0.612192
DDIT4	173.999	127.596	150.797	100.103	55.0129	145.655	100.257	1.50531	0.590058	0.0770171	0.612192
ZNF503	47.9176	31.8152	39.8664	16.8982	27.2314	33.975	26.0349	1.54584	0.628395	0.0769853	0.612192
SEC23IP	57.0934	77.0262	67.0598	94.5932	66.8407	131.863	97.7658	-1.45527	-0.541282	0.0767117	0.612192
POLR2L	92.4369	87.7429	90.0899	68.8785	76.4679	43.0575	62.8013	1.42791	0.513901	0.0775494	0.612192
PIK3C2A	65.2495	70.3283	67.7889	90.0013	79.4936	115.381	94.9585	-1.39475	-0.480008	0.0764359	0.612192
TAOK3	50.2965	50.5694	50.433	87.4298	64.09	60.5496	70.6898	-1.41271	-0.498462	0.0770331	0.612192
ZNF268	31.2654	21.0985	26.1819	14.3267	13.4782	22.5379	16.7809	1.58108	0.660913	0.0765956	0.612192
MBNL2	56.4137	63.6304	60.022	103.41	41.8098	136.909	94.0429	-1.56567	-0.646779	0.0760431	0.612192
DIS3L	17.3319	26.4568	21.8944	29.0208	32.1825	39.6936	33.6323	-1.51768	-0.601872	0.0775516	0.612192
IL16	8.15619	4.68855	6.42237	1.65309	2.20052	5.71857	3.19072	2.10257	1.07215	0.0775897	0.612192
RPS17	19.0311	12.0563	15.5437	63.7356	13.4782	13.1191	30.111	-1.94337	-0.958563	0.0770308	0.612192
TICRR	3.73826	25.1172	14.4278	20.3881	43.1851	18.5013	27.3581	-1.89313	-0.920776	0.0776637	0.612192
RP11-529K1.3	0	0	0	0	0	6.72773	2.24258	-64.4981	-6.01118	0.0765586	0.612192
MYOCD	3.05857	7.36773	5.21315	3.67352	1.10026	1.68193	2.1519	2.29064	1.19575	0.0770791	0.612192
FLII	228.373	261.889	245.131	368.271	346.581	289.629	334.827	-1.36876	-0.452869	0.0761368	0.612192
FAM134C	81.5619	72.3377	76.9498	59.1437	58.5887	46.4213	54.7179	1.38696	0.471927	0.0760416	0.612192
EFTUD2	79.8627	96.4502	88.1565	115.349	136.432	107.644	119.808	-1.35945	-0.443028	0.0776343	0.612192
RBM42	53.6949	61.9559	57.8254	85.4094	73.7173	78.378	79.1682	-1.38056	-0.465256	0.07731	0.612192
CTD-3018O17.3	6.79683	4.35366	5.57524	2.93882	3.30077	1.34555	2.52838	2.08349	1.059	0.0757493	0.612192
ZNF525	11.5546	8.03752	9.79606	5.87764	4.6761	5.71857	5.4241	1.78224	0.833695	0.0758792	0.612192
SIRPB1	3.05857	1.67448	2.36653	0.918381	1.10026	0.336386	0.785008	2.77301	1.47145	0.0767677	0.612192
SYNGR1	6.79683	3.68386	5.24035	2.02044	3.30077	2.35471	2.55864	2.08509	1.06011	0.0758866	0.612192
NGFRAP1	184.874	161.755	173.314	95.6953	123.779	151.038	123.504	1.40897	0.49464	0.0758912	0.612192
ZNF680	3.73826	7.03283	5.38554	0.918381	3.02571	3.70025	2.54811	2.2213	1.1514	0.0777767	0.612233
ODF2	45.5387	75.3517	60.4452	76.7766	91.5965	89.8152	86.0628	-1.42025	-0.506142	0.0778239	0.612233
COL1A1	22926.4	18440.1	20683.2	9300.81	17310.6	16308	14306.5	1.44575	0.531819	0.0777823	0.612233
MRPS26	13.5937	19.7589	16.6763	26.2657	26.1311	23.2107	25.2025	-1.52291	-0.606835	0.0778809	0.612321
AC093616.4	5.43746	6.02814	5.7328	11.2042	6.60155	13.1191	10.3083	-1.78682	-0.837391	0.0779942	0.612851
TMEM200A	11.5546	9.37711	10.4659	16.1635	14.8535	20.856	17.291	-1.61827	-0.694451	0.0781082	0.613386
ZNF501	7.13667	9.712	8.42434	3.8572	5.22623	4.70941	4.59761	1.87464	0.906614	0.0782523	0.613576
PTPLAD2	11.2148	6.69793	8.95635	2.93882	5.77636	5.71857	4.81125	1.92926	0.948051	0.0782703	0.613576
ZNF628	8.83588	9.712	9.27394	19.6533	14.0283	11.4371	15.0396	-1.66079	-0.731871	0.0781789	0.613576
ALDH4A1	4.75778	5.35835	5.05806	9.00013	8.527	9.75521	9.09411	-1.782	-0.833495	0.0785663	0.613715
DNAJC6	7.47651	5.35835	6.41743	2.57147	2.75065	5.0458	3.45597	1.96898	0.977448	0.0788291	0.613715
CHMP3	106.031	95.7804	100.905	67.5928	78.1183	78.7144	74.8085	1.36593	0.449889	0.0787914	0.613715
GLS	149.53	177.495	163.513	112.593	115.527	130.518	119.546	1.37576	0.460226	0.0785654	0.613715
AC007362.1	13.5937	9.712	11.6528	4.5919	7.97687	8.40966	6.99281	1.72984	0.790636	0.07887	0.613715
GIGYF2	81.5619	99.7992	90.6806	148.227	121.579	106.635	125.48	-1.38968	-0.474749	0.078641	0.613715
SLC10A7	4.75778	8.03752	6.39765	13.041	5.22623	18.1649	12.144	-1.88524	-0.914745	0.0786512	0.613715
MLLT4	84.9603	90.0872	87.5238	124.165	121.028	104.616	116.603	-1.34516	-0.427775	0.0783553	0.613715
CPED1	5.43746	9.37711	7.40728	13.9594	8.527	16.8193	13.1019	-1.75682	-0.812967	0.0787313	0.613715
PALM2-AKAP2	0	0	0	0.918381	0	5.0458	1.98806	-56.9843	-5.83249	0.0788255	0.613715
DFNB31	7.81635	2.34428	5.08031	2.57147	1.37532	2.69109	2.21263	2.26438	1.17912	0.0785685	0.613715
SAMD8	73.7456	67.6491	70.6974	55.8375	39.0592	55.1674	50.0214	1.4094	0.495082	0.0788852	0.613715
TMEM41B	27.867	30.1407	29.0038	40.7761	25.8561	74.3414	46.9912	-1.61446	-0.691051	0.0785839	0.613715
MYO10	97.8743	127.261	112.568	201.309	138.082	137.246	158.879	-1.41474	-0.50054	0.0789343	0.613739
ZNF624	6.11714	8.70731	7.41223	3.30617	4.6761	4.03664	4.0063	1.89435	0.921706	0.0790016	0.613905
EIF5B	141.714	121.902	131.808	219.493	198.872	134.891	184.419	-1.40224	-0.487733	0.079355	0.61522
PTPN23	84.2807	92.7664	88.5235	136.655	118.828	102.934	119.472	-1.35818	-0.441672	0.079281	0.61522
TMEM68	23.7889	14.7355	19.2622	12.49	10.4525	13.1191	12.0205	1.59931	0.677449	0.0793367	0.61522
RNFT2	0	0.334897	0.167448	0.734705	2.47558	0.672773	1.29435	-6.42928	-2.68466	0.079267	0.61522
TDP1	9.8554	19.7589	14.8072	18.0003	32.4576	22.5379	24.3319	-1.63457	-0.708912	0.0794458	0.615485
HM13	162.784	183.188	172.986	293.698	176.041	262.045	243.928	-1.41093	-0.496643	0.0794813	0.615485
IGFBP2	3.73826	0.334897	2.03658	1.28573	0	0	0.428578	4.09308	2.03319	0.079766	0.616617
CPSF6	100.933	99.7992	100.366	71.2663	78.9435	70.9775	73.7291	1.36374	0.447573	0.0797335	0.616617
RCAN1	40.4411	60.6163	50.5287	74.5725	55.563	86.4513	72.1956	-1.42643	-0.512411	0.07971	0.616617
SKIL	54.0348	39.8527	46.9437	38.021	22.8304	32.2931	31.0481	1.50233	0.587205	0.0799059	0.617341
PUF60	90.3978	90.0872	90.2425	140.145	117.177	107.307	121.543	-1.35623	-0.439606	0.0799609	0.617409
CDS2	67.9683	84.394	76.1811	53.0824	58.5887	55.1674	55.6128	1.3768	0.461319	0.0801558	0.618557
TMEM8B	16.3124	9.712	13.0122	6.06131	8.25194	8.74605	7.68643	1.73272	0.793036	0.0802369	0.618825
CLCF1	24.8084	25.787	25.2977	20.3881	14.5784	12.4463	15.8043	1.55089	0.633098	0.0803163	0.619079
CDC45	3.39841	22.1032	12.7508	26.4494	28.0566	16.1465	23.5508	-1.84652	-0.884806	0.0804051	0.619406
PARP1	53.6949	86.0684	69.8817	82.6543	136.432	83.4238	100.837	-1.44199	-0.52806	0.0808176	0.620538
RHOU	2.71873	0.669793	1.69426	0.367352	0.550129	0.672773	0.530085	3.22344	1.6886	0.0807424	0.620538
PSME4	95.4954	126.591	111.043	166.962	138.357	155.074	153.464	-1.38379	-0.468623	0.0807644	0.620538
CPSF1	98.554	115.874	107.214	155.206	142.758	138.255	145.407	-1.3646	-0.448481	0.0807085	0.620538
GSTO1	99.2337	133.289	116.261	181.839	162.563	139.937	161.446	-1.39214	-0.4773	0.0808424	0.620538
AACS	35.3435	27.4615	31.4025	48.4905	40.9846	47.7669	45.7473	-1.46506	-0.550958	0.0807093	0.620538
EMC9	4.0781	5.02345	4.55077	9.00013	5.77636	10.7644	8.51362	-1.85163	-0.888794	0.0808772	0.620538
DDX46	66.6089	93.7711	80.19	116.083	116.902	96.2065	109.731	-1.37147	-0.455719	0.0809928	0.621069
RP11-807H7.1	0	0.334897	0.167448	0.367352	1.10026	2.69109	1.38623	-6.55213	-2.71196	0.0810881	0.621443
TPP2	58.1129	62.6257	60.3693	83.0216	71.5168	97.2157	83.918	-1.38403	-0.468872	0.0811474	0.621541
DDX19A	38.4021	37.5084	37.9552	54.7355	52.5373	57.1857	54.8195	-1.44072	-0.526793	0.0812608	0.622052
BMS1P10	1.01952	2.67917	1.84935	7.53072	2.47558	3.02748	4.34459	-2.38874	-1.25625	0.081328	0.62221
GPR89C	1.35937	1.67448	1.51692	6.24499	2.75065	2.01832	3.67132	-2.49662	-1.31997	0.0817455	0.62271
PRUNE	14.953	14.0657	14.5093	8.08175	10.7275	7.73689	8.84872	1.64627	0.719198	0.0817662	0.62271
CAST	221.916	241.46	231.688	356.332	328.702	259.354	314.796	-1.3615	-0.445198	0.0816674	0.62271
CLDN23	3.39841	1.33959	2.369	0.551028	1.65039	0	0.733805	3.06888	1.61771	0.081498	0.62271
ENPP2	61.1714	34.4944	47.8329	19.6533	34.9332	37.6753	30.7539	1.56454	0.645734	0.0815867	0.62271
RP11-849H4.2	0.339841	0.334897	0.337369	1.10206	1.92545	1.68193	1.56981	-4.10561	-2.0376	0.0815157	0.62271
CDIP1	10.1952	8.37242	9.28383	4.40823	6.60155	4.70941	5.23973	1.79725	0.84579	0.0815916	0.62271
KIAA0100	153.608	224.716	189.162	285.8	290.743	214.615	263.719	-1.39529	-0.480561	0.0817057	0.62271
RTN4	1300.57	1184.53	1242.55	914.156	935.77	898.825	916.25	1.35568	0.439021	0.0819377	0.622791
EIF2B5	39.7614	48.56	44.1607	71.2663	52.8124	60.2132	61.4306	-1.39974	-0.485156	0.0819634	0.622791
SPON1	5.7773	2.67917	4.22824	1.65309	3.02571	0	1.5596	2.60446	1.38098	0.0819229	0.622791
PNKP	18.3514	23.4428	20.8971	36.7352	34.3831	23.5471	31.5551	-1.52739	-0.611064	0.0818588	0.622791
AUTS2	5.7773	8.37242	7.07486	15.2451	13.4782	7.73689	12.1534	-1.75149	-0.808583	0.0821048	0.6232
CIB1	27.5272	25.4521	26.4896	41.6945	35.2083	39.0208	38.6412	-1.47233	-0.558099	0.0821105	0.6232
KDM4C	22.7694	26.1219	24.4457	39.674	29.4319	39.3572	36.1544	-1.48365	-0.56915	0.0821705	0.623301
IFI16	181.135	190.556	185.846	160.717	118.003	126.818	135.179	1.36842	0.452516	0.0828229	0.62333
WWC1	1.35937	6.36304	3.8612	13.041	6.60155	4.70941	8.11732	-2.11642	-1.08162	0.0828654	0.62333
RP3-393E18.2	0	0.334897	0.167448	3.30617	0.275065	0.336386	1.30587	-6.8944	-2.78543	0.0827396	0.62333
FAM221A	0	0.334897	0.167448	1.10206	1.37532	1.00916	1.16218	-5.87402	-2.55435	0.0826764	0.62333
GTF2IRD2	39.7614	18.4193	29.0904	25.531	15.1285	13.1191	17.9262	1.60623	0.683678	0.0827832	0.62333
RP11-514P8.8	3.39841	0	1.69921	0.918381	0	0	0.306127	4.69459	2.231	0.0827874	0.62333
CREB3	49.6168	51.5741	50.5955	67.9602	66.8407	76.6961	70.499	-1.38155	-0.466289	0.0825286	0.62333
DDX21	140.354	131.949	136.152	255.31	132.856	190.395	192.854	-1.41812	-0.503981	0.0828078	0.62333
VCL	194.729	230.744	212.736	298.106	316.049	253.635	289.264	-1.36161	-0.445316	0.0823116	0.62333
YBX3	392.177	330.543	361.36	293.147	287.993	207.887	263.009	1.37147	0.455721	0.0826813	0.62333
SPRYD3	28.2068	37.8433	33.0251	42.2455	59.1389	44.7394	48.7079	-1.4697	-0.555518	0.0826597	0.62333
ZNF101	9.51556	6.36304	7.9393	3.12249	5.77636	4.03664	4.31183	1.89536	0.922475	0.0826231	0.62333
ZNF222	1.69921	4.68855	3.19388	6.61234	4.95116	8.40966	6.65772	-2.03684	-1.02633	0.0825502	0.62333
PNMAL1	0.339841	1.33959	0.839714	2.20411	3.30077	2.01832	2.50774	-2.87372	-1.52292	0.0828742	0.62333
SRPX	66.6089	48.56	57.5845	35.2658	37.6838	47.0941	40.0146	1.45172	0.537763	0.0822252	0.62333
ABTB1	49.6168	37.8433	43.7301	31.4086	31.3574	26.2381	29.668	1.45539	0.541403	0.0831033	0.62336
KCTD14	0	0.334897	0.167448	0.918381	1.10026	1.68193	1.23352	-5.87554	-2.55472	0.0831562	0.62336
PNMA1	98.554	95.4455	96.9998	58.5927	91.0464	57.1857	68.9416	1.40777	0.493412	0.0831076	0.62336
IDH3A	20.0506	29.4709	24.7608	36.7352	36.3085	37.6753	36.9063	-1.48544	-0.570887	0.0829327	0.62336
RP11-761I4.3	0.339841	0.334897	0.337369	0.734705	1.65039	2.69109	1.69206	-4.26292	-2.09184	0.0830427	0.62336
CARHSP1	56.7535	64.97	60.8617	46.4701	47.3111	29.602	41.1277	1.46621	0.552089	0.0831582	0.62336
TXNDC11	39.0818	54.5882	46.835	69.2459	56.9384	71.3139	65.8327	-1.40484	-0.490401	0.0834449	0.624458
VAC14	41.8005	69.9934	55.8969	96.7973	80.5939	61.5587	79.65	-1.42886	-0.514865	0.0833754	0.624458
CERK	69.6675	69.9934	69.8304	101.389	100.949	82.0783	94.8054	-1.37002	-0.454192	0.0833986	0.624458
EIF2B3	19.0311	18.7542	18.8927	29.9392	22.5553	33.6386	28.711	-1.51419	-0.598549	0.0836093	0.624638
PPARG	22.4295	21.4334	21.9315	30.6739	36.0335	30.9476	32.5516	-1.47632	-0.562001	0.0835306	0.624638
MAMLD1	4.0781	7.03283	5.55546	9.18381	11.0026	9.08243	9.75627	-1.73985	-0.798964	0.0835642	0.624638
AC093838.4	21.0702	23.7777	22.4239	43.3476	29.707	26.9109	33.3218	-1.50409	-0.588893	0.0840541	0.624815
EEF1E1-BLOC1S5	0	0	0	1.28573	1.37532	2.69109	1.78405	-48.4567	-5.59862	0.0837999	0.624815
EEF1A1P6	4.75778	8.70731	6.73255	3.67352	3.8509	2.69109	3.40517	1.92751	0.94674	0.083687	0.624815
INTS9	6.45699	12.3912	9.42408	17.0819	15.6787	13.1191	15.2932	-1.64923	-0.72179	0.0840234	0.624815
CPEB3	0.679683	1.33959	1.00963	3.48985	1.10026	4.37302	2.98771	-2.87608	-1.5241	0.0839361	0.624815
HEATR5A	52.3356	73.6773	63.0064	82.6543	85.27	96.5429	88.1557	-1.39286	-0.478046	0.0837734	0.624815
ARHGAP5	100.593	109.846	105.22	80.0828	53.6376	92.1699	75.2968	1.39879	0.484179	0.084067	0.624815
OAZ2	98.554	85.3986	91.9763	59.3274	76.1929	65.9317	67.1507	1.37747	0.462022	0.0839041	0.624815
ZNF559	20.7303	21.0985	20.9144	10.1022	14.3034	17.4921	13.9659	1.54775	0.630171	0.0838617	0.624815
ARMCX3	86.9994	81.7148	84.3571	125.818	73.9924	161.129	120.313	-1.42499	-0.51095	0.0841007	0.624815
VAV2	33.6443	34.4944	34.0693	60.4294	43.7353	42.7211	48.9619	-1.45256	-0.538603	0.0841626	0.624927
RAB40B	12.2343	8.70731	10.4708	5.69396	7.42674	5.0458	6.0555	1.72242	0.784433	0.0842674	0.62501
PLAUR	55.3941	63.9653	59.6797	83.2053	86.0952	75.3506	81.5503	-1.37337	-0.457723	0.0842328	0.62501
ABCC2	4.41794	6.36304	5.39049	3.48985	2.20052	1.68193	2.45743	2.02144	1.01538	0.0843651	0.625388
RP11-316M1.12	0	0	0	1.65309	0.825194	2.69109	1.72312	-48.4423	-5.5982	0.0844588	0.625736
AHR	134.917	147.689	141.303	115.532	95.4474	97.8885	102.956	1.3612	0.444874	0.0845111	0.625775
RNF2	36.363	30.8105	33.5868	22.2248	20.0797	25.5654	22.6233	1.49678	0.581865	0.0848113	0.626123
RMDN2	8.49603	10.7167	9.60636	3.67352	4.6761	8.40966	5.58643	1.80528	0.852221	0.0854017	0.626123
RUVBL1	25.1483	29.136	27.1421	34.1638	41.8098	45.7486	40.574	-1.47003	-0.555846	0.0848983	0.626123
ACAP2	102.292	107.502	104.897	76.7766	67.3908	87.7969	77.3214	1.36411	0.44796	0.0851726	0.626123
SLIT3	0.339841	1.33959	0.839714	3.12249	3.02571	1.00916	2.38579	-2.95246	-1.56192	0.0851217	0.626123
PHF1	97.1946	107.502	102.348	91.8381	69.3163	58.5312	73.2285	1.38739	0.472374	0.0850492	0.626123
LRRC24	0	0	0	3.12249	1.92545	0	1.68265	-50.386	-5.65495	0.0848823	0.626123
SBF2	50.9762	52.5788	51.7775	82.4706	58.8638	72.6595	71.3313	-1.38444	-0.469306	0.0847998	0.626123
TAF1D	111.808	83.0544	97.4311	191.574	71.7918	177.612	146.993	-1.50901	-0.593601	0.0853786	0.626123
NOP2	38.0622	31.4803	34.7713	54.3681	48.6864	44.403	49.1525	-1.43717	-0.523234	0.0853653	0.626123
HNF1A	0.339841	0	0.169921	1.46941	0.825194	1.00916	1.10125	-5.87222	-2.55391	0.0852971	0.626123
C12orf65	12.2343	17.7495	14.9919	27.1841	19.8046	21.8651	22.9513	-1.55065	-0.632874	0.0851682	0.626123
C1QTNF9B	2.71873	1.33959	2.02916	0.367352	0	1.68193	0.683095	3.21757	1.68597	0.0849492	0.626123
CTC-786C10.1	1.01952	1.33959	1.17956	5.32661	1.92545	2.01832	3.09013	-2.69571	-1.43066	0.0851259	0.626123
LINC00304	0.339841	0	0.169921	2.20411	0.550129	0.672773	1.14234	-6.23451	-2.64028	0.0853751	0.626123
UBE2G1	65.5894	62.9606	64.275	41.8782	43.7353	54.4946	46.7027	1.40218	0.487669	0.085384	0.626123
MRPL45	44.8591	46.8855	45.8723	28.1024	31.6324	36.3297	32.0215	1.46575	0.551642	0.0849557	0.626123
SNPH	15.9725	19.0891	17.5308	21.4901	31.3574	26.5745	26.474	-1.48989	-0.575203	0.0852309	0.626123
RABEPK	15.6327	12.0563	13.8445	22.2248	17.3291	24.5562	21.37	-1.53971	-0.622658	0.0856184	0.627023
TMUB2	68.3081	61.9559	65.132	47.7558	48.6864	45.4122	47.2848	1.37241	0.456711	0.0856018	0.627023
ZBED6	30.2459	37.1735	33.7097	69.2459	42.635	38.0117	49.9642	-1.49174	-0.576995	0.085771	0.627797
SLC27A4	15.9725	36.5037	26.2381	39.8577	48.6864	32.9659	40.5033	-1.54391	-0.626589	0.0859747	0.628255
RP11-45M22.4	0	0	0	2.75514	2.20052	0	1.65189	-49.4276	-5.62724	0.0859032	0.628255
RP5-850E9.3	0	0	0	0	5.77636	0	1.92545	-55.9428	-5.80588	0.0859328	0.628255
PTPRF	69.3276	109.846	89.5869	204.799	148.26	63.577	138.879	-1.55185	-0.633992	0.0861198	0.628971
CDKN2C	1.69921	13.3959	7.54754	8.81645	17.8792	17.4921	14.7292	-1.93945	-0.955648	0.0874998	0.629566
CC2D1B	40.781	41.1923	40.9866	61.1642	54.1877	56.1765	57.1761	-1.4072	-0.492826	0.0873374	0.629566
PRKACB	47.9176	57.9371	52.9274	32.327	32.1825	46.4213	36.977	1.44812	0.534182	0.0866478	0.629566
FNBP1L	35.0037	24.7824	29.893	14.5104	22.2802	23.2107	20.0004	1.51654	0.600787	0.0867225	0.629566
FAM89A	2.03905	3.01407	2.52656	4.40823	6.05142	5.38218	5.28061	-2.0202	-1.0145	0.0862799	0.629566
KIF26B	5.43746	3.68386	4.56066	7.7144	11.0026	6.39134	8.36944	-1.83503	-0.875805	0.0871618	0.629566
SPR	4.75778	6.02814	5.39296	7.16337	9.62726	12.7827	9.85777	-1.75858	-0.81441	0.0864042	0.629566
ZDBF2	26.1678	27.4615	26.8147	38.7557	23.9306	63.577	42.0878	-1.56368	-0.64495	0.0869382	0.629566
CCNL1	76.1245	67.6491	71.8868	162.553	79.2186	74.3414	105.371	-1.46942	-0.555251	0.0863352	0.629566
CHD1	53.6949	60.2814	56.9882	96.43	57.7636	85.4422	79.8786	-1.40436	-0.489918	0.0868155	0.629566
KIF20A	4.0781	48.56	26.3191	13.7757	84.4448	75.0142	57.7449	-2.19064	-1.13135	0.0864739	0.629566
ZNF318	48.2575	61.621	54.9392	74.5725	89.9461	64.2498	76.2561	-1.38995	-0.475038	0.0872523	0.629566
PAQR8	2.37889	4.01876	3.19882	4.22455	9.62726	6.05496	6.63559	-2.02684	-1.01923	0.0870417	0.629566
CITED2	78.5034	94.106	86.3047	125.634	114.427	104.616	114.893	-1.33991	-0.422141	0.0872557	0.629566
PTN	5.43746	3.68386	4.56066	7.53072	9.90232	7.73689	8.38998	-1.81637	-0.861055	0.0866036	0.629566
KIAA1875	2.37889	1.67448	2.02669	1.10206	0.550129	0	0.550729	2.94966	1.56055	0.0869429	0.629566
ST6GALNAC4	14.2733	14.7355	14.5044	22.4085	19.5296	24.5562	22.1648	-1.52036	-0.604409	0.0868756	0.629566
BMI1	29.906	31.4803	30.6932	12.49	13.7532	31.9567	19.4	1.59906	0.677226	0.0871106	0.629566
BMS1P1	4.0781	9.37711	6.7276	2.75514	1.37532	5.71857	3.28301	2.09067	1.06396	0.0875209	0.629566
AGAP8	2.71873	5.69324	4.20599	6.97969	11.2776	6.05496	8.1041	-1.91479	-0.937185	0.0867851	0.629566
SORBS1	4.0781	1.33959	2.70884	1.65309	0.275065	0.672773	0.866974	2.80465	1.48782	0.0873984	0.629566
NSMCE4A	8.49603	17.0797	12.7879	16.8982	22.5553	20.856	20.1032	-1.55648	-0.638287	0.0870099	0.629566
TTC7B	15.2929	20.4287	17.8608	35.6332	23.1054	22.2015	26.98	-1.5284	-0.612024	0.087077	0.629566
CRIP2	27.867	27.1266	27.4968	47.7558	56.3882	23.5471	42.5637	-1.55335	-0.635386	0.0874657	0.629566
PITPNA-AS1	3.39841	2.34428	2.87135	0.183676	1.37532	2.01832	1.19244	2.67688	1.42055	0.0872793	0.629566
CTD-2319I12.1	15.2929	20.7636	18.0282	9.55116	15.1285	9.08243	11.254	1.60779	0.685077	0.0874721	0.629566
TMEM189	71.0268	49.8996	60.4632	40.5924	42.3599	43.3939	42.1154	1.43895	0.525017	0.0875064	0.629566
MT-ND5	999.473	1759.88	1379.68	1647.21	2512.44	1740.46	1966.7	-1.42542	-0.511387	0.0870777	0.629566
UBXN7	150.21	159.411	154.81	127.471	91.0464	119.754	112.757	1.37005	0.454229	0.0877674	0.63039
TARS	356.154	379.103	367.628	343.291	215.926	239.171	266.129	1.37909	0.463719	0.0877125	0.63039
ZCCHC24	141.714	122.237	131.976	61.1642	129.555	89.1424	93.2873	1.41709	0.502936	0.087777	0.63039
RHBDF2	7.47651	5.02345	6.24998	18.1839	6.87661	9.08243	11.381	-1.84555	-0.884048	0.0878736	0.630744
ACBD3	69.3276	68.9887	69.1582	127.839	60.5142	108.989	99.114	-1.43466	-0.520712	0.08828	0.631073
FMN2	1.01952	6.02814	3.52383	12.1226	8.25194	3.02748	7.80068	-2.22175	-1.1517	0.0881976	0.631073
MBOAT2	53.6949	69.6585	61.6767	40.7761	45.6607	46.0849	44.1739	1.40863	0.494298	0.0882884	0.631073
RP11-23J9.5	2.71873	1.00469	1.86171	0.918381	0.550129	0	0.489503	3.08295	1.62431	0.0883917	0.631073
SART1	61.8511	84.0591	72.9551	110.94	94.0721	92.8427	99.285	-1.36604	-0.449996	0.0883496	0.631073
BCL9L	347.998	224.046	286.022	205.35	224.178	191.74	207.089	1.38059	0.465289	0.0882243	0.631073
KRT81	0.339841	1.33959	0.839714	2.75514	4.40103	0.672773	2.60965	-3.07058	-1.61851	0.0881463	0.631073
NCOR2	171.96	169.458	170.709	287.086	235.73	180.64	234.485	-1.37668	-0.461189	0.0879701	0.631073
ARHGEF9	19.7108	14.7355	17.2231	23.3269	20.9049	34.6478	26.2932	-1.51037	-0.594898	0.0883665	0.631073
EDA2R	72.3862	45.5459	58.9661	34.3474	32.1825	53.1491	39.893	1.48534	0.57079	0.0881209	0.631073
AC004466.1	1.69921	2.00938	1.85429	0.551028	0.825194	0.672773	0.682998	2.70648	1.43642	0.0885109	0.631585
FAM229A	16.6522	11.3865	14.0194	11.9389	6.05142	5.71857	7.90298	1.71855	0.781191	0.0887003	0.632222
CDH18	4.75778	0.334897	2.54634	0.183676	1.65039	0.336386	0.723483	3.46473	1.79274	0.0888041	0.632222
GNAI1	60.8316	56.2626	58.5471	38.572	38.234	47.7669	41.5243	1.43282	0.518861	0.0886527	0.632222
SH3BGRL	45.5387	40.1876	42.8632	22.7758	22.8304	40.7028	28.7697	1.50566	0.590395	0.0887711	0.632222
ZMAT1	0.339841	0	0.169921	0.918381	1.92545	0.672773	1.1722	-5.87453	-2.55447	0.0888366	0.632222
MRGPRF	59.8121	31.4803	45.6462	15.4288	48.6864	17.4921	27.2024	1.67889	0.747508	0.0889239	0.632259
FANCI	21.0702	63.9653	42.5177	55.6539	84.7199	56.1765	65.5168	-1.53983	-0.622772	0.0889365	0.632259
FABP3	0	0	0	1.28573	2.75065	0.672773	1.56972	-46.1865	-5.5294	0.0889876	0.632285
ABHD11	3.73826	8.37242	6.05534	11.0206	14.0283	7.4005	10.8165	-1.7935	-0.842779	0.0890895	0.632673
C9orf114	25.4881	23.4428	24.4654	35.8168	40.9846	29.9384	35.58	-1.46628	-0.552158	0.089228	0.63332
NBEAL1	18.3514	27.7964	23.0739	32.5107	25.8561	47.4305	35.2657	-1.5193	-0.603402	0.089515	0.634346
CBWD5	14.2733	7.70262	10.988	12.8573	19.8046	22.2015	18.2878	-1.64284	-0.716195	0.089441	0.634346
FADS1	650.456	553.249	601.853	340.719	332.003	602.468	425.063	1.41684	0.502681	0.0894924	0.634346
PHF23	81.2221	70.3283	75.7752	58.7764	59.689	44.403	54.2895	1.38136	0.466092	0.0895906	0.634544
KCTD9	102.632	129.605	116.119	89.8176	73.1672	94.1882	85.7243	1.3551	0.438398	0.089665	0.634735
ADRM1	79.183	89.4174	84.3002	137.941	100.949	101.252	113.381	-1.35141	-0.434465	0.0898163	0.635469
MED6	29.5662	27.1266	28.3464	19.4697	18.7044	20.856	19.6767	1.44607	0.532132	0.0899272	0.635917
DNAJB2	110.448	69.3236	89.886	75.8582	54.7378	60.8859	63.8273	1.40329	0.488817	0.0899991	0.636066
NAMPT	48.9372	61.621	55.2791	79.3481	43.7353	127.49	83.5246	-1.50861	-0.593219	0.0900435	0.636066
NOSTRIN	0	0.334897	0.167448	0.551028	2.47558	0.672773	1.23313	-6.10567	-2.61015	0.0902677	0.636681
ABCA12	2.71873	0.669793	1.69426	0	1.10026	0.336386	0.478882	3.59959	1.84783	0.0903677	0.636681
TMEM242	26.1678	35.1641	30.666	24.7963	17.054	18.5013	20.1172	1.49917	0.584164	0.090369	0.636681
ZBED5	73.4057	48.8949	61.1503	21.1228	44.0103	53.8218	39.6516	1.54983	0.632113	0.0904551	0.636681
JMJD7-PLA2G4B	1.69921	10.0469	5.87305	11.5716	8.25194	14.1282	11.3173	-1.91593	-0.938046	0.090301	0.636681
POLG	69.6675	103.483	86.5753	146.206	113.877	96.5429	118.875	-1.37659	-0.461099	0.0904642	0.636681
PLCB1	15.9725	7.36773	11.6701	5.14293	5.77636	9.41882	6.77937	1.75374	0.810434	0.090191	0.636681
FAF1	25.1483	47.8902	36.5192	67.0418	47.8612	47.0941	53.999	-1.48285	-0.56837	0.090853	0.638466
RNPC3	27.867	23.1079	25.4874	16.5309	16.7789	18.1649	17.1582	1.49574	0.580856	0.0913911	0.638466
DGKD	38.0622	35.8339	36.9481	67.9602	45.3856	46.0849	53.1436	-1.45046	-0.536514	0.0912156	0.638466
TMEM158	6.79683	12.7261	9.76145	8.81645	23.9306	18.5013	17.0828	-1.73351	-0.793696	0.0918711	0.638466
VPRBP	35.0037	38.848	36.9258	57.858	47.5862	50.7944	52.0795	-1.42829	-0.51429	0.0915524	0.638466
LAMP3	4.41794	9.712	7.06497	10.6532	8.25194	19.8468	12.9173	-1.8051	-0.852076	0.0908848	0.638466
IL15	14.6132	11.3865	12.9998	4.95926	9.07713	9.75521	7.93053	1.69755	0.763456	0.0916493	0.638466
RAI14	157.347	157.067	157.207	267.065	184.293	193.422	214.927	-1.37054	-0.45474	0.0910964	0.638466
CAMLG	53.6949	44.5413	49.1181	32.6944	22.2802	44.403	33.1259	1.48886	0.57421	0.0911773	0.638466
SLC26A2	22.4295	31.1454	26.7875	25.1636	39.8844	60.5496	41.8658	-1.55264	-0.634725	0.0917152	0.638466
TMEM217	8.15619	1.67448	4.91534	3.12249	1.65039	1.34555	2.03948	2.31014	1.20798	0.0909533	0.638466
REPS1	47.5778	45.8808	46.7293	72.3684	48.6864	75.6869	65.5806	-1.40346	-0.488988	0.0911287	0.638466
BCL7B	29.5662	35.8339	32.7001	65.9397	40.9846	37.3389	48.0877	-1.48081	-0.566382	0.0914424	0.638466
AHCYL2	14.2733	17.7495	16.0114	22.9595	26.1311	24.2198	24.4368	-1.51223	-0.596673	0.0916546	0.638466
FBXO10	10.5351	18.7542	14.6446	22.4085	23.3805	22.5379	22.7756	-1.54829	-0.630675	0.0919262	0.638466
ZNF189	36.7029	19.7589	28.2309	11.7553	17.6041	24.8926	18.084	1.57694	0.65713	0.0914595	0.638466
PFKP	266.775	331.548	299.162	525.314	434.877	295.347	418.513	-1.4001	-0.485526	0.0913827	0.638466
MYOF	486.313	446.417	466.365	711.561	660.155	531.154	634.29	-1.36163	-0.44533	0.0912442	0.638466
RRP12	30.5857	27.4615	29.0236	56.3886	33.2828	39.3572	43.0095	-1.49311	-0.578323	0.0908159	0.638466
GDF11	21.7498	20.0938	20.9218	14.3267	14.8535	11.7735	13.6512	1.50934	0.59392	0.0917397	0.638466
CDK5RAP3	102.292	81.3799	91.8361	128.573	131.481	112.689	124.248	-1.35831	-0.441818	0.0909677	0.638466
ZNF426	19.0311	15.4052	17.2182	12.49	9.07713	10.428	10.665	1.57124	0.651901	0.0912277	0.638466
ZNF833P	0.339841	0	0.169921	1.83676	1.65039	0	1.16238	-6.17879	-2.62733	0.0915385	0.638466
ZNF302	44.5192	31.4803	37.9998	16.7145	26.6813	32.6295	25.3418	1.51579	0.600072	0.0919606	0.638466
HNRNPL	182.495	275.285	228.89	328.413	324.301	280.546	311.087	-1.35976	-0.443348	0.0919294	0.638466
ZNF28	17.6718	19.0891	18.3804	10.6532	14.0283	11.1008	11.9274	1.5577	0.639419	0.0918527	0.638466
AGTR1	41.1208	43.2017	42.1612	20.3881	27.5065	38.0117	28.6354	1.49294	0.578159	0.0921778	0.639161
SEC63	134.917	147.02	140.968	217.289	133.406	238.834	196.51	-1.39366	-0.47888	0.0922041	0.639161
RPL36A-HNRNPH2	0	0	0	2.38779	2.20052	0	1.52944	-45.9132	-5.52084	0.0921437	0.639161
PSRC1	4.75778	15.0703	9.91406	6.79602	30.5322	19.174	18.8341	-1.88928	-0.917837	0.0924473	0.640182
TUBA8	0	0	0	2.02044	1.10026	1.00916	1.37662	-43.6675	-5.44849	0.0924341	0.640182
GSTM1	34.6638	21.7683	28.2161	16.1635	23.6555	16.8193	18.8795	1.49827	0.583299	0.0925583	0.64047
ANKLE1	1.69921	2.00938	1.85429	3.8572	4.95116	3.36386	4.05741	-2.16905	-1.11706	0.0925848	0.64047
TAB2	156.667	135.968	146.317	121.043	93.2469	107.307	107.199	1.35886	0.442395	0.0926501	0.640571
TMEM198B	49.6168	24.7824	37.1996	12.6737	30.8072	26.5745	23.3518	1.60096	0.678938	0.0926954	0.640571
RAB10	162.444	142.331	152.388	108.185	116.352	116.39	113.642	1.34808	0.430906	0.0930177	0.641141
CRIM1	138.655	290.355	214.505	432.557	305.597	209.232	315.795	-1.47289	-0.558647	0.0929145	0.641141
CHPF	100.253	78.7007	89.477	126.737	94.8973	144.983	122.205	-1.36459	-0.44847	0.0930161	0.641141
MYH10	75.1049	127.261	101.183	119.573	201.347	116.39	145.77	-1.44016	-0.526224	0.0928843	0.641141
TBC1D3H	0.339841	3.34897	1.8444	4.5919	9.62726	0.672773	4.96398	-2.66689	-1.41516	0.0930157	0.641141
TMEM178A	2.37889	1.33959	1.85924	0.551028	0.825194	0.672773	0.682998	2.70652	1.43644	0.0930875	0.641291
GPRIN1	6.79683	11.0516	8.92421	12.1226	20.6298	11.7735	14.842	-1.65515	-0.726962	0.0932725	0.642057
DOPEY2	13.9335	15.7401	14.8368	23.3269	29.707	15.8102	22.948	-1.55607	-0.637907	0.0932948	0.642057
ASGR1	2.71873	2.00938	2.36406	1.10206	0.825194	0.672773	0.866674	2.53022	1.33926	0.0934401	0.642725
SNTA1	24.4686	22.1032	23.2859	14.8778	19.8046	10.7644	15.1489	1.5213	0.605305	0.0936306	0.643705
GATA2	2.37889	4.01876	3.19882	10.6532	5.77636	3.02748	6.48568	-2.06799	-1.04823	0.0938854	0.645124
SYT11	98.8938	50.2345	74.5642	32.5107	59.1389	59.8768	50.5088	1.4806	0.56618	0.0940663	0.645541
ZFP90	42.1403	29.8058	35.9731	19.4697	22.8304	31.2839	24.528	1.4858	0.571235	0.0940911	0.645541
CTD-2162K18.5	2.71873	1.67448	2.19661	0.734705	0.825194	1.00916	0.856352	2.57715	1.36578	0.0940604	0.645541
SELENBP1	13.5937	4.68855	9.1411	3.48985	6.87661	3.70025	4.6889	1.95153	0.964605	0.0943721	0.645584
LINC00607	2.03905	3.34897	2.69401	0.734705	1.10026	1.68193	1.1723	2.45471	1.29555	0.0945485	0.645584
CAMK4	0.679683	1.00469	0.842186	2.93882	1.37532	2.69109	2.33508	-2.77773	-1.47391	0.0947401	0.645584
PRKDC	183.854	392.164	288.009	372.128	445.054	412.41	409.864	-1.42279	-0.508721	0.0947126	0.645584
TPM2	660.991	592.097	626.544	457.721	515.471	418.801	463.998	1.34944	0.432357	0.094681	0.645584
DTX4	3.73826	3.01407	3.37616	0.734705	1.92545	2.01832	1.55949	2.35709	1.23701	0.0942792	0.645584
EFTUD1	28.5467	36.5037	32.5252	55.6539	47.5862	37.0025	46.7475	-1.45053	-0.536584	0.094462	0.645584
SYNM	31.9451	21.0985	26.5218	55.4702	21.455	47.7669	41.564	-1.56922	-0.650051	0.0946712	0.645584
POLR3E	29.906	33.8246	31.8653	51.9803	39.8844	44.403	45.4226	-1.44089	-0.526958	0.094774	0.645584
SLX1A	16.9921	19.7589	18.3755	25.1636	29.4319	27.5837	27.3931	-1.4724	-0.558174	0.0942898	0.645584
FOXF1	164.823	150.369	157.596	100.287	143.309	103.271	115.622	1.3643	0.448163	0.0946699	0.645584
PDK2	34.6638	21.7683	28.2161	11.9389	25.8561	16.8193	18.2048	1.55829	0.639963	0.094673	0.645584
PCSK4	4.75778	0	2.37889	0.183676	1.37532	0.336386	0.631795	3.67176	1.87647	0.0945609	0.645584
DIRAS1	6.45699	5.69324	6.07511	10.2859	8.527	12.4463	10.4197	-1.69082	-0.757723	0.0945411	0.645584
CD40	0.679683	0	0.339841	1.46941	1.37532	1.34555	1.39676	-3.88109	-1.95646	0.0948404	0.645708
IMPDH1	54.7145	78.7007	66.7076	117.553	78.9435	81.0691	92.5218	-1.39138	-0.476516	0.095023	0.646292
CCBE1	67.6284	55.5928	61.6106	40.9598	51.9872	38.0117	43.6529	1.4102	0.495898	0.0950148	0.646292
ZNF468	30.9256	29.4709	30.1982	18.9186	12.653	28.2565	19.9427	1.52607	0.609826	0.0952159	0.647274
ADSS	83.601	80.0403	81.8206	48.3068	59.1389	72.9959	60.1472	1.37395	0.458326	0.0953061	0.647558
PHEX	3.05857	2.00938	2.53398	0.734705	0.825194	1.68193	1.08061	2.48893	1.31553	0.0953706	0.647666
NUDT18	1.69921	3.01407	2.35664	4.95926	4.12597	5.38218	4.82247	-2.02251	-1.01615	0.0956025	0.648713
CLEC16A	29.5662	27.7964	28.6813	41.6945	38.7841	43.3939	41.2908	-1.43749	-0.52355	0.0956218	0.648713
RP11-312O7.2	5.09762	13.061	9.0793	3.67352	7.97687	1.34555	4.33198	2.076	1.05381	0.0958924	0.649106
DZIP1L	5.43746	9.712	7.57473	14.1431	12.1028	11.1008	12.4489	-1.67803	-0.746773	0.095851	0.649106
EDRF1	22.4295	23.7777	23.1036	38.7557	28.8818	31.9567	33.1981	-1.45813	-0.544116	0.0959227	0.649106
DERL2	46.2184	42.197	44.2077	57.858	47.036	82.7511	62.5484	-1.40879	-0.494461	0.0958945	0.649106
FAM104A	51.6559	47.5553	49.6056	32.5107	34.6581	39.6936	35.6208	1.41594	0.501758	0.0958561	0.649106
TWSG1	78.5034	76.0215	77.2624	48.8579	61.0643	62.9043	57.6088	1.36023	0.443853	0.0960241	0.649463
TMEM184C	79.183	77.0262	78.1046	51.4293	56.3882	67.9501	58.5892	1.35324	0.436423	0.0963429	0.651054
POP7	15.2929	15.0703	15.1816	19.837	27.7815	22.2015	23.2733	-1.51321	-0.59761	0.0963568	0.651054
PCSK5	7.81635	10.7167	9.26652	16.7145	14.5784	11.7735	14.3555	-1.59558	-0.674083	0.0964289	0.651212
CDCA8	5.09762	34.1595	19.6285	17.8166	56.1132	35.3206	36.4168	-1.85141	-0.888628	0.0982373	0.651628
RRAGC	104.671	121.567	113.119	90.5523	75.9178	86.4513	84.3072	1.33608	0.418011	0.0967476	0.651628
HLX	40.1013	45.5459	42.8236	36.9189	28.6067	21.1923	28.906	1.45842	0.54441	0.0985127	0.651628
PLEKHH2	2.37889	2.67917	2.52903	0.551028	1.10026	1.68193	1.11107	2.48853	1.31529	0.0970003	0.651628
MCFD2	178.757	201.943	190.35	261.922	195.296	330.331	262.516	-1.37805	-0.462623	0.0973386	0.651628
LINC00342	8.49603	10.7167	9.60636	11.7553	22.5553	13.1191	15.8099	-1.634	-0.708411	0.0978652	0.651628
ITPRIPL1	0.679683	0.669793	0.674738	1.65309	3.02571	1.68193	2.12024	-2.97243	-1.57164	0.0968196	0.651628
MARCH7	146.132	124.247	135.189	84.1237	89.9461	123.454	99.1745	1.36969	0.453846	0.0986857	0.651628
TNS1	195.409	132.284	163.846	104.695	144.134	106.298	118.376	1.38451	0.469377	0.0974471	0.651628
DIS3L2	11.8944	14.0657	12.9801	20.0207	17.8792	20.856	19.5853	-1.50605	-0.590772	0.0986388	0.651628
RFTN1	20.3905	29.136	24.7632	47.5721	32.4576	29.9384	36.656	-1.49278	-0.578	0.0971515	0.651628
PLSCR4	19.0311	31.8152	25.4231	18.0003	14.5784	17.4921	16.6903	1.51838	0.602537	0.0968872	0.651628
RP11-440L14.1	1.35937	1.00469	1.18203	3.8572	3.02571	1.68193	2.85495	-2.55147	-1.35133	0.0965627	0.651628
METTL14	29.906	37.8433	33.8747	16.5309	25.581	26.9109	23.0076	1.49582	0.580941	0.0981216	0.651628
SLC38A9	27.1873	21.7683	24.4778	11.2042	13.7532	23.2107	16.056	1.55183	0.633973	0.0966914	0.651628
CTC-487M23.8	4.75778	2.34428	3.55103	13.7757	5.50129	3.02748	7.43483	-2.1232	-1.08624	0.0978055	0.651628
SPDL1	16.3124	51.2392	33.7758	38.7557	67.1157	54.4946	53.4553	-1.5798	-0.659745	0.0973842	0.651628
FLOT1	144.772	92.4315	118.602	72.9194	94.6222	93.8518	87.1311	1.36446	0.448327	0.0981129	0.651628
ADCY10P1	9.8554	10.0469	9.95115	2.38779	7.15168	7.4005	5.64666	1.81791	0.862282	0.098174	0.651628
SMAP1	31.2654	27.1266	29.196	50.1436	33.0077	44.0666	42.406	-1.4607	-0.546658	0.0979413	0.651628
MAGI2	6.45699	4.01876	5.23787	11.2042	6.32648	9.75521	9.09531	-1.76044	-0.815939	0.0973505	0.651628
[truncated: 55,774 more rows]

## Sheet: seed
Name	Fold change	Log fold change	P-value	FDR p-value	CPM	CPM	CPM	CPM	CPM	CPM
hsa-miR-4442	-42.8492	-5.4212	2.80695e-07	0.000587776	4.4309	13.6259	4.1842	0.312915	0.120088	0.0631073
hsa-miR-6814-5p	-16.2483	-4.02222	4.26855e-06	0.00446917	58.1014	12.0038	4.11447	2.44074	0.660483	1.45147
hsa-miR-3197	-13.3963	-3.74376	1.22154e-05	0.00852634	13.2927	28.6793	1.25526	0.813579	1.38101	1.00972
hsa-miR-4501	-28.462	-4.83096	4.3378e-05	0.0227084	1.36592	12.0687	3.20789	0.187749	0.0600439	0.315536
hsa-miR-3606-3p	7.3603	2.87976	0.000117318	0.0409438	31.0829	41.4617	29.9171	576.077	103.696	74.4666
hsa-miR-520a-5p	30.6055	4.93572	9.91994e-05	0.0409438	0.0666301	0	0.278947	2.00266	3.36246	4.66994
hsa-miR-491-3p	-40.9752	-5.35668	0.000141421	0.0423052	1.19934	5.77479	1.60394	0.062583	0.0600439	0.0631073
hsa-miR-3135a	-12.8449	-3.68313	0.000164437	0.0430413	65.1642	3.958	6.90394	2.31557	0.180132	3.40779
hsa-miR-1285-3p	24.1465	4.59374	0.000249009	0.05274	0.033315	0.0648853	0.348684	2.69107	4.68342	2.14565
hsa-miR-3164	31.3456	4.97019	0.000251862	0.05274	0.0999451	0	0.278947	8.63646	3.18233	0.378644
hsa-miR-4282	5.83518	2.54478	0.000365348	0.0637532	28.6509	95.9005	63.1117	783.164	190.639	121.103
hsa-miR-6830-5p	-8.10594	-3.01898	0.000343654	0.0637532	82.9544	27.7709	4.67236	4.56856	4.9236	4.73305
hsa-miR-3910	-27.6491	-4.78916	0.000402522	0.064837	1.49918	4.93128	1.04605	0.062583	0.120088	0.0631073
hsa-miR-600	52.0444	5.70167	0.000512401	0.0766406	0.033315	0	0.0697367	2.81624	1.80132	1.57768
hsa-miR-548ao-5p	-9.04031	-3.17637	0.000711759	0.0993616	8.79517	51.1945	4.25394	4.63114	0.120088	2.33497
hsa-miR-4649-3p	-8.25094	-3.04456	0.000897032	0.117399	25.9191	249.808	5.92762	13.7683	8.16597	12.1797
hsa-miR-4786-3p	-8.77933	-3.13411	0.00107207	0.118153	15.858	15.0534	1.25526	2.31557	1.14083	0.189322
hsa-miR-1286	-8.75705	-3.13044	0.00105557	0.118153	18582.8	315130	4540.07	8435.57	24756.8	5433.98
hsa-miR-3619-3p	26.0174	4.70141	0.000983232	0.118153	0.033315	0.129771	0.139473	4.81889	0.720527	2.08254
hsa-miR-498-3p	-16.2756	-4.02463	0.00113595	0.118934	4.86399	3.63358	0.906578	0.187749	0.0600439	0.315536
hsa-miR-219a-2-3p	-9.36848	-3.22782	0.00150765	0.150334	9.46147	6.94273	2.99868	1.62716	0.240176	0.189322
hsa-miR-12136	5.07044	2.34211	0.00162278	0.154459	21.5881	53.5953	42.2605	359.79	189.378	46.1945
hsa-miR-4310	17.7166	4.14703	0.00214182	0.186874	0.166575	0.129771	0.139473	6.32089	0.240176	1.57768
hsa-miR-4660	-7.09022	-2.82583	0.00208582	0.186874	7.49588	36.7251	2.37105	1.68974	3.78277	1.07282
hsa-miR-4480	-7.9104	-2.98375	0.00225139	0.188577	46.4412	6.35876	1.46447	4.13048	2.4618	0.252429
hsa-miR-4681	39.982	5.32128	0.00243345	0.195986	0.033315	0.0648853	0	4.4434	0.180132	0.126215
hsa-miR-205-3p	19.7035	4.30038	0.00287213	0.222749	0	0.0648853	0.278947	3.6924	2.28167	0.441751
hsa-miR-6789-5p	-7.28143	-2.86422	0.00328573	0.245726	7.96229	22.645	0.976314	2.37816	0.30022	1.64079
hsa-miR-3919	-4.99031	-2.31913	0.00352929	0.254839	13.0262	23.8778	6.0671	2.44074	4.50329	1.64079
hsa-miR-4690-5p	-4.91157	-2.29618	0.00552986	0.287736	8.49533	17.2595	3.48684	2.87882	1.98145	1.07282
hsa-miR-6760-5p	-10.2041	-3.35107	0.00560681	0.287736	6.36317	7.59158	0.20921	0.062583	0.360263	0.946609
hsa-miR-4717-3p	7.24	2.85599	0.00546569	0.287736	4.36427	0.259541	2.37105	2.9414	47.0144	0.946609
hsa-miR-4436a	-8.45726	-3.08019	0.00566267	0.287736	1.86564	11.3549	0.976314	0.312915	0.960702	0.378644
hsa-miR-153-5p	16.8685	4.07626	0.00490409	0.287736	0	0.0648853	0.20921	1.37683	1.80132	0.69418
hsa-miR-6068	-5.99415	-2.58356	0.00577121	0.287736	14.0256	2.85495	3.69605	1.18908	2.04149	0.189322
hsa-miR-3120-5p	5.24809	2.39179	0.00437119	0.287736	857.196	1399.77	353.496	6902.78	4037.11	2760.19
hsa-miR-5004-5p	-23.7064	-4.5672	0.00479525	0.287736	1.53249	3.43892	0	0.062583	0	0.126215
hsa-miR-3171	-10.9508	-3.45296	0.00467159	0.287736	3.03167	0.389312	4.95131	0.187749	0.240176	0.315536
hsa-miR-4294	-6.38723	-2.67519	0.00517707	0.287736	1057.82	1758.78	87.0314	49.1903	196.884	208.506
hsa-miR-4470	-13.2015	-3.72263	0.00460188	0.287736	1.73238	2.6603	1.74342	0.062583	0.240176	0.126215
hsa-miR-4325	-5.35226	-2.42015	0.00565375	0.287736	125.798	34.4541	14.0171	13.8309	6.4247	12.3059
hsa-miR-1263	-7.43194	-2.89374	0.00567474	0.287736	5.43035	4.08778	2.51052	1.00133	0.480351	0.126215
hsa-miR-4275	-47.3647	-5.56574	0.00623646	0.303701	0	3.958	0	0	0.0600439	0
hsa-miR-1238-5p	-5.24683	-2.39145	0.00673195	0.32038	9.49478	35.7518	2.58026	4.25565	1.62119	3.21847
hsa-miR-3663-3p	-10.5005	-3.39239	0.00813406	0.378505	1.59912	7.5267	0.20921	0.187749	0.30022	0.378644
hsa-miR-6072	9.80393	3.29336	0.00851682	0.38094	0.0999451	0.0648853	1.04605	5.19439	1.56114	4.85926
hsa-miR-5011-3p	-4.2526	-2.08835	0.00855023	0.38094	120.767	347.591	21.6184	62.3327	27.5602	25.306
hsa-miR-454-5p	-4.67981	-2.22645	0.00941568	0.410759	6.09665	16.1564	6.27631	0.563247	3.48255	2.01943
hsa-miR-196a-1-3p	8.92484	3.15783	0.0105499	0.436266	1.29929	0.0648853	0.0697367	9.51262	2.82206	1.07282
hsa-miR-10b-3p	10.2311	3.35488	0.0106254	0.436266	0.732931	0.0648853	0.139473	6.07055	0.180132	3.91265
hsa-miR-6501-5p	5.27552	2.39931	0.0104709	0.436266	5.93008	8.69463	14.1566	140.311	5.16378	6.37384
hsa-miR-1243	-6.5448	-2.71035	0.0131766	0.513579	3.93117	11.7442	0.278947	1.56458	0.600439	0.252429
hsa-miR-635	-5.83291	-2.54422	0.0131456	0.513579	25.3527	19.2709	1.67368	0.062583	1.80132	6.0583
hsa-miR-4720-3p	-12.9157	-3.69105	0.0132442	0.513579	3.89786	0.129771	0.20921	0.125166	0.0600439	0.126215
hsa-miR-489-5p	11.735	3.55274	0.0147799	0.562712	0.13326	0	0.348684	3.3169	0.840615	1.51457
hsa-miR-524-3p	-5.49176	-2.45727	0.0157015	0.576823	4.33095	9.01906	2.16184	0.500664	0.540395	1.767
hsa-miR-4672	9.69137	3.2767	0.0156583	0.576823	0.0666301	0.583968	0.139473	5.38214	2.22162	0.0631073
hsa-miR-217-5p	-14.972	-3.90419	0.0160598	0.579813	2.23211	0	2.71973	0	0.120088	0.189322
hsa-miR-3682-3p	9.83867	3.29846	0.0165038	0.580608	0.13326	0.194656	0.278947	1.62716	1.26092	2.83983
hsa-miR-4722-5p	-4.4565	-2.15591	0.0167841	0.580608	19.8558	45.1602	1.74342	2.9414	9.36685	2.65051
hsa-miR-7106-5p	-4.82043	-2.26916	0.0169136	0.580608	15.2583	25.4999	8.64736	0.125166	2.28167	7.8253
hsa-miR-1277-5p	9.31109	3.21895	0.0187525	0.594967	0.53304	0	0.0697367	1.00133	2.94215	2.52429
hsa-miR-3158-3p	3.96901	1.98878	0.0187516	0.594967	24.4532	14.5992	3.20789	60.8933	67.4293	39.8207
hsa-miR-3927-5p	-8.56727	-3.09883	0.0183813	0.594967	2.53194	11.5496	0	1.37683	0.120088	0.126215
hsa-miR-6749-5p	-4.09137	-2.03258	0.0182712	0.594967	18.5565	30.9503	2.58026	4.56856	2.28167	5.86898
hsa-miR-4533	-3.69608	-1.886	0.0181887	0.594967	15.7247	32.6373	7.18288	5.25697	8.10593	1.64079
hsa-miR-655-5p	3.26262	1.70603	0.0194176	0.606873	5.89676	2.59541	5.57894	13.7683	10.3876	22.0244
hsa-miR-12135	3.14714	1.65404	0.0206847	0.619813	109.84	200.95	173.644	1011.4	267.916	245.172
hsa-miR-5739	-3.79941	-1.92578	0.0221996	0.619813	9.82793	10.3817	3.13815	1.50199	3.18233	1.45147
hsa-miR-6499-5p	-4.53591	-2.18139	0.0219665	0.619813	8.39539	7.0725	2.0921	2.00266	0.480351	1.38836
hsa-miR-6508-5p	7.59717	2.92546	0.0220083	0.619813	1.16603	0	0.0697367	3.50465	3.90285	2.5874
hsa-miR-6886-3p	-5.9697	-2.57766	0.0209389	0.619813	1.46586	15.2481	0.836841	0.187749	2.22162	0.504858
hsa-miR-638	-3.49553	-1.80551	0.0213327	0.619813	8.89511	24.2022	4.7421	5.44472	2.58189	2.77672
hsa-miR-4648	-8.98621	-3.16771	0.0220784	0.619813	0.0666301	9.01906	0.488157	0.062583	0.600439	0.378644
hsa-miR-4760-5p	-12.4669	-3.64003	0.0221834	0.619813	2.39868	0	0.906578	0.062583	0.120088	0.0631073
hsa-miR-4700-3p	-4.49658	-2.16883	0.0233762	0.626823	5.73019	41.1373	0.767104	2.87882	5.10373	2.5874
hsa-miR-4798-3p	-8.07435	-3.01335	0.0227501	0.626823	1.89896	1.36259	1.74342	0.062583	0.30022	0.252429
hsa-miR-556-5p	-7.36163	-2.88003	0.0241256	0.626823	0.13326	10.2519	2.37105	0.250332	1.14083	0.315536
hsa-miR-3137	-3.96573	-1.98758	0.0233713	0.626823	17.4238	22.7747	4.04473	6.2583	0.660483	4.22819
hsa-miR-367-5p	-6.04771	-2.59639	0.0242467	0.626823	5.96339	4.15266	0.697367	0.062583	1.14083	0.567966
hsa-miR-5002-3p	4.79271	2.26084	0.0241593	0.626823	1.13271	1.55725	0.697367	7.07188	5.464	3.84954
hsa-miR-606	8.12497	3.02236	0.0296939	0.636069	0.0666301	0.0648853	0.139473	1.62716	0.240176	0.378644
hsa-miR-4779	-3.94144	-1.97872	0.0284382	0.636069	5.99671	28.4847	0.836841	1.56458	5.16378	2.20875
hsa-miR-4678	7.83929	2.97072	0.02779	0.636069	0.166575	0.129771	0.0697367	1.75232	1.20088	0.189322
hsa-miR-5092	-10.4049	-3.37919	0.0303084	0.636069	2.86509	0.129771	0.41842	0	0.0600439	0.252429
hsa-miR-3126-3p	3.04571	1.60678	0.0266758	0.636069	7.7624	5.19083	13.4592	14.3941	28.1606	37.8013
hsa-miR-10399-5p	9.32111	3.2205	0.0268726	0.636069	0.166575	0.259541	0.139473	2.75365	2.52184	0.126215
hsa-miR-4330	-3.55142	-1.8284	0.0274292	0.636069	8.4287	33.9999	9.97235	5.13181	7.50549	2.08254
hsa-miR-6132	-3.95374	-1.98322	0.0302847	0.636069	36.7132	351.678	15.4118	13.2676	75.7754	13.0632
hsa-miR-4313	-3.07052	-1.61848	0.0302687	0.636069	19.5226	9.53814	3.97499	4.00531	4.56334	2.20875
hsa-miR-4683	-3.02898	-1.59883	0.0286301	0.636069	6.49643	22.061	10.5302	4.25565	4.74347	3.84954
hsa-miR-4633-3p	-5.55429	-2.4736	0.0255915	0.636069	4.53084	4.8664	2.58026	0.813579	1.32097	0
hsa-miR-7154-3p	-3.24244	-1.69708	0.0272647	0.636069	10.3943	44.122	7.04341	9.26229	2.82206	6.87869
hsa-miR-6781-5p	4.29701	2.10333	0.030116	0.636069	2.13216	0.713739	10.4605	2.50332	37.5274	17.1021
hsa-miR-6881-5p	-4.01712	-2.00616	0.0275967	0.636069	195.626	46.5877	4.88157	34.8587	9.54698	17.1021
hsa-miR-6830-3p	-3.47757	-1.79808	0.027717	0.636069	6.56306	16.8053	8.29867	3.75498	2.34171	2.96604
hsa-miR-4266	-3.96428	-1.98706	0.0291672	0.636069	7.26268	14.4694	1.04605	1.87749	2.4618	1.38836
hsa-miR-887-3p	-2.88993	-1.53103	0.0256679	0.636069	21.1884	21.6717	17.3644	6.19572	6.00439	8.70881
hsa-miR-6821-5p	-3.55826	-1.83117	0.0273126	0.636069	4.59747	11.874	6.34604	1.25166	2.40176	2.71361
hsa-miR-1302	-7.61132	-2.92815	0.0303758	0.636069	1.66575	0.583968	3.06842	0.062583	0.420307	0.189322
hsa-miR-6892-5p	-3.75359	-1.90827	0.0315158	0.653407	18.4565	81.8853	3.97499	7.94805	11.0481	8.77191
hsa-miR-4436b-3p	-8.15326	-3.02738	0.0322606	0.654453	1.36592	0.454197	1.88289	0.187749	0.0600439	0.189322
hsa-miR-1182	-4.08332	-2.02974	0.0325039	0.654453	2.46531	25.0457	1.04605	2.44074	1.5011	3.02915
hsa-miR-200a-5p	3.27639	1.71211	0.0322899	0.654453	31.7492	9.14883	8.29867	41.6177	57.7022	62.4131
hsa-miR-4796-3p	3.33212	1.73644	0.0344271	0.658593	2.39868	6.48853	6.62499	25.7216	8.10593	17.6069
hsa-miR-651-3p	-4.05576	-2.01997	0.0342206	0.658593	3.49808	14.6641	6.34604	1.37683	4.3832	0.252429
hsa-miR-4438	-8.07988	-3.01433	0.0338413	0.658593	0.26652	2.2061	1.74342	0.062583	0.240176	0.189322
hsa-miR-4685-5p	-4.72801	-2.24123	0.0345966	0.658593	4.33095	15.1832	0.906578	3.56723	0.480351	0.252429
hsa-miR-4421	3.2882	1.7173	0.0341447	0.658593	1428.91	548.605	697.995	1984.76	4056.09	2757.35
hsa-miR-548au-3p	7.7817	2.96009	0.0339654	0.658593	0.166575	0.0648853	0.348684	1.56458	2.52184	0.441751
hsa-miR-4423-5p	4.585	2.19692	0.0352693	0.665351	2.89841	3.24427	33.4736	159.274	10.2675	12.0535
hsa-miR-6165	-3.95902	-1.98514	0.0366323	0.672878	941.816	8158.16	434.878	1047.64	952.356	408.367
hsa-miR-939-3p	-3.04929	-1.60847	0.0363501	0.672878	9.16163	10.187	6.76446	4.19306	1.9214	2.46118
hsa-miR-4649-5p	-3.52595	-1.81801	0.036059	0.672878	6.96284	19.3358	1.25526	2.9414	2.58189	2.27186
hsa-miR-15a-3p	-3.6121	-1.85284	0.0377302	0.687017	12.9262	84.4807	6.13683	11.9534	9.36685	7.32044
hsa-miR-3133	-5.79745	-2.53542	0.0429783	0.702448	1.39923	4.80151	3.34736	0	0.30022	1.32525
hsa-miR-3912-3p	-5.78604	-2.53258	0.0406409	0.702448	5.03057	0.519083	2.30131	0.062583	0.900659	0.378644
hsa-miR-6750-3p	-3.86262	-1.94958	0.043274	0.702448	8.62859	12.3282	1.25526	4.4434	0.600439	0.69418
hsa-miR-3667-5p	-3.14302	-1.65215	0.0422229	0.702448	36.6798	77.7975	22.3158	25.4713	11.4684	6.56316
hsa-miR-3923	-5.43537	-2.44238	0.0419822	0.702448	0.19989	13.4313	2.16184	0.813579	0.240176	1.83011
hsa-miR-3677-5p	-4.10541	-2.03753	0.0420419	0.702448	1.0994	132.431	10.5302	13.3928	6.845	14.8302
hsa-miR-648	-8.40358	-3.071	0.0425879	0.702448	1.56581	2.14122	0.139473	0.062583	0	0.378644
hsa-miR-873-5p	-6.17837	-2.62723	0.0420767	0.702448	1.66575	7.0725	0.278947	1.00133	0.0600439	0.378644
hsa-miR-3059-3p	5.07144	2.3424	0.0420588	0.702448	0.53304	0.583968	0.976314	1.62716	1.86136	7.06802
hsa-miR-637	-5.97156	-2.57811	0.0411964	0.702448	2.16548	6.6183	2.58026	0	1.56114	0.315536
hsa-miR-3126-5p	-2.86152	-1.51678	0.0419104	0.702448	21.2217	33.5457	4.11447	7.32221	3.78277	9.46609
hsa-miR-3622b-5p	-7.34628	-2.87701	0.0426886	0.702448	0.46641	0.648853	4.11447	0.125166	0.120088	0.441751
hsa-miR-3117-3p	3.85026	1.94496	0.0419294	0.702448	3.26487	0.0648853	4.11447	14.5193	6.72492	7.50977
hsa-miR-6734-5p	-5.40931	-2.43544	0.0408136	0.702448	0.666301	8.69463	2.44079	0.876162	0.960702	0.315536
hsa-miR-6755-3p	3.93702	1.9771	0.0455883	0.734323	9.69467	2.59541	28.3131	132.301	2.70198	24.8643
hsa-miR-490-3p	-2.86472	-1.51839	0.046193	0.737295	11.4271	14.3397	15.8302	8.44871	4.02294	2.01943
hsa-miR-140-3p	-3.01475	-1.59204	0.0485795	0.737295	15.4915	17.4542	7.74078	1.56458	4.98364	6.9418
hsa-miR-3125	-3.39967	-1.76539	0.0508152	0.737295	13.426	52.9464	2.0921	13.1424	4.26312	2.71361
hsa-miR-1321	-2.82973	-1.50066	0.0469757	0.737295	19.5559	13.1717	17.2947	3.75498	6.18452	7.7622
hsa-miR-4491	-4.17785	-2.06276	0.0467317	0.737295	3.03167	9.66791	4.81183	0.125166	1.14083	2.90294
hsa-miR-3922-5p	-3.81182	-1.93048	0.0494602	0.737295	2.76515	7.13739	5.71841	1.18908	2.16158	0.69418
hsa-miR-1470	-2.74016	-1.45426	0.0480617	0.737295	34.6143	16.5458	7.94999	8.44871	3.24237	9.90784
hsa-miR-4490	5.54387	2.47089	0.0503235	0.737295	1.19934	0.129771	0.20921	6.50864	2.04149	0.315536
hsa-miR-6790-3p	2.60729	1.38255	0.0495484	0.737295	9.62804	3.89312	11.0184	15.8961	18.7337	29.4711
hsa-miR-1911-5p	7.03353	2.81425	0.0504864	0.737295	0.0666301	0.0648853	0.0697367	0.312915	1.08079	0.126215
hsa-miR-144-5p	-5.4849	-2.45547	0.0493444	0.737295	2.79846	1.62213	1.74342	0.813579	0.120088	0.189322
hsa-miR-4706	5.68923	2.50823	0.0510544	0.737295	1.56581	0	0.278947	1.56458	5.16378	4.16508
hsa-miR-4684-3p	4.61906	2.2076	0.0495474	0.737295	1.46586	0.519083	2.71973	19.7137	0.240176	1.83011
hsa-miR-4777-5p	-3.32016	-1.73125	0.0475413	0.737295	3.29819	31.2747	2.44079	4.19306	2.70198	4.22819
hsa-miR-3680-3p	-4.95573	-2.3091	0.0500424	0.737295	0.299835	4.67174	13.3197	0.688413	2.34171	0.631073
hsa-miR-4731-3p	5.85103	2.54869	0.0522697	0.744576	1.56581	30.6259	0.488157	187.937	2.88211	0.441751
hsa-miR-4726-3p	-3.95296	-1.98293	0.0521749	0.744576	2.69852	13.3015	3.13815	0.187749	2.04149	2.5874
hsa-miR-1236-5p	-5.18258	-2.37367	0.0553329	0.782886	3.36482	2.14122	0.348684	0.62583	0.120088	0.378644
hsa-miR-10526-3p	-5.07801	-2.34426	0.058091	0.802009	4.53084	3.76335	0.348684	1.18908	0.0600439	0.441751
hsa-miR-338-5p	7.54034	2.91463	0.057743	0.802009	0	0	0.20921	0.62583	0.660483	0.126215
hsa-miR-8075	3.90496	1.96531	0.0582165	0.802009	1.66575	0.259541	2.30131	5.82022	6.30461	4.48062
hsa-miR-3161	-4.78154	-2.25748	0.0571166	0.802009	2.16548	2.85495	1.95263	0.62583	0	0.820395
hsa-miR-6513-3p	-3.00546	-1.58759	0.060322	0.814045	14.492	15.1183	1.53421	3.37948	1.68123	5.30101
hsa-miR-138-2-3p	-6.66562	-2.73674	0.0606452	0.814045	1.83233	0.0648853	0.697367	0.125166	0	0.252429
hsa-miR-3191-3p	-4.85852	-2.28052	0.0599544	0.814045	7.66246	0.519083	1.46447	0.125166	0.780571	1.07282
hsa-miR-124-5p	-3.49466	-1.80515	0.0601829	0.814045	17.5237	6.22899	2.58026	1.62716	5.58408	0.315536
hsa-miR-6502-3p	3.96824	1.9885	0.0616893	0.817578	2.39868	0.129771	0.976314	6.88413	4.02294	3.34469
hsa-miR-659-5p	-4.28392	-2.09893	0.0615038	0.817578	3.86454	11.874	0.488157	0.375498	0.240176	3.15536
hsa-miR-3158-5p	-4.93978	-2.30445	0.0625898	0.824295	2.39868	1.88167	2.02237	0.813579	0.0600439	0.441751
hsa-miR-4495	6.16045	2.62303	0.064177	0.839916	0.033315	0.0648853	0.278947	1.43941	0.0600439	0.757287
hsa-miR-6748-5p	2.65156	1.40684	0.0656913	0.849721	3.56471	8.75952	2.65	5.19439	18.3134	16.1555
hsa-miR-653-5p	-3.69772	-1.88663	0.0657377	0.849721	8.39539	5.12594	1.74342	0.125166	2.10154	1.89322
hsa-miR-553	-2.59187	-1.37399	0.0669612	0.860107	24.32	28.6793	4.81183	9.76295	2.76202	9.78163
hsa-miR-219a-1-3p	4.20149	2.0709	0.067545	0.860107	5.5303	0.97328	39.6802	182.179	5.04369	6.81559
hsa-miR-6857-5p	-3.08408	-1.62484	0.0677735	0.860107	9.59473	12.1984	4.67236	5.13181	3.18233	0.252429
hsa-miR-576-3p	-3.14967	-1.6552	0.068984	0.864986	6.66301	11.5496	2.99868	2.87882	0.120088	3.72333
hsa-miR-3975	-4.51531	-2.17483	0.0687464	0.864986	1.53249	6.94273	3.48684	2.31557	0.0600439	0.252429
hsa-miR-4694-3p	-2.61684	-1.38782	0.0730001	0.893993	29.9835	38.2175	8.71709	12.454	8.04588	8.89813
hsa-miR-6858-3p	-3.24045	-1.69619	0.0740254	0.893993	3.0983	10.7061	3.13815	1.43941	1.9214	1.83011
hsa-miR-4761-5p	-2.85506	-1.51352	0.074341	0.893993	53.4373	13.1068	9.06578	17.0226	3.54259	5.93208
hsa-miR-4251	-2.9651	-1.56808	0.0734492	0.893993	13.8924	74.6181	6.97367	8.38613	7.3854	16.4079
hsa-miR-9851-5p	-3.24287	-1.69727	0.0725841	0.893993	8.62859	13.4313	4.81183	0.062583	4.9236	3.28158
hsa-miR-3157-3p	-3.44043	-1.78259	0.0719578	0.893993	7.22936	6.09922	0.697367	1.18908	1.56114	1.32525
hsa-miR-514a-3p	4.21826	2.07665	0.0747129	0.893993	1.86564	0.129771	0.697367	3.94273	2.94215	4.92237
hsa-miR-4260	-3.14415	-1.65267	0.074482	0.893993	6.46312	43.4732	1.46447	4.94406	5.76421	5.61655
hsa-miR-548g-3p	-3.28966	-1.71794	0.0765503	0.910775	2.63189	29.1335	0.767104	2.75365	1.56114	5.55344
hsa-miR-4695-5p	-3.22605	-1.68977	0.0787516	0.915317	6.89621	6.35876	2.92894	1.37683	3.12228	0.504858
hsa-miR-4757-3p	-2.77417	-1.47205	0.0799918	0.915317	15.3249	6.09922	2.51052	2.44074	4.62338	1.57768
hsa-miR-3065-5p	-4.35137	-2.12147	0.0797289	0.915317	5.36372	0	7.81051	1.18908	1.44105	0.378644
hsa-miR-3162-3p	-2.72407	-1.44576	0.0777541	0.915317	5.26377	9.79768	7.81051	3.62982	1.44105	3.28158
hsa-miR-6075	-2.79474	-1.48271	0.0791552	0.915317	5.89676	26.1488	1.74342	5.38214	2.52184	4.16508
hsa-miR-6846-3p	-2.70695	-1.43667	0.0795035	0.915317	10.1278	23.9427	5.29999	2.25299	6.96509	5.30101
hsa-miR-4755-3p	-3.93045	-1.9747	0.0792287	0.915317	3.59802	6.42365	4.60262	0.062583	1.74127	1.89322
hsa-miR-4661-3p	-2.45307	-1.29459	0.0813558	0.915893	44.5089	52.1029	32.4973	7.88546	31.2829	13.4419
hsa-miR-7113-5p	-3.05191	-1.60971	0.0825101	0.915893	9.49478	7.65647	4.81183	5.94539	0.360263	0.883502
hsa-miR-4431	2.79324	1.48194	0.0810977	0.915893	259.158	394.438	625.817	1947.96	870.757	754.763
hsa-miR-133a-5p	-3.71252	-1.8924	0.0823775	0.915893	8.32876	5.51525	0.348684	0.187749	1.9214	1.7039
hsa-miR-2861	-2.60792	-1.3829	0.0810061	0.915893	12.793	22.5152	8.22893	5.25697	3.66268	7.7622
hsa-miR-542-3p	-4.01181	-2.00425	0.0826666	0.915893	2.53194	2.01144	2.65	1.00133	0.420307	0.378644
hsa-miR-5580-3p	-2.5782	-1.36637	0.0840798	0.916561	7.49588	12.7175	12.2039	2.44074	4.32316	5.74276
hsa-miR-3123	-4.29726	-2.10342	0.0842724	0.916561	4.46421	3.24427	2.23158	0.125166	2.04149	0.126215
hsa-miR-4756-3p	-5.41101	-2.4359	0.0853238	0.916561	0.0999451	9.08395	0.488157	0.563247	1.20088	0
hsa-miR-383-3p	-3.3565	-1.74696	0.0853531	0.916561	3.7646	5.3206	2.71973	1.43941	1.80132	0.252429
hsa-miR-3913-3p	-4.25014	-2.08751	0.0852073	0.916561	1.13271	5.96945	1.60394	0.750996	1.14083	0.126215
hsa-miR-6804-3p	4.97958	2.31602	0.084709	0.916561	1.39923	0.129771	0.139473	0.563247	7.68562	0.315536
hsa-miR-4638-3p	4.17948	2.06332	0.0864506	0.918921	2.76515	0.0648853	0.0697367	7.50996	1.08079	3.78644
hsa-miR-3663-5p	-2.5348	-1.34187	0.0862446	0.918921	7.62914	12.2633	6.55525	3.56723	1.74127	5.11169
hsa-miR-1537-5p	-5.31332	-2.40961	0.0872697	0.922943	1.66575	0.194656	2.85921	0.250332	0.240176	0.378644
hsa-miR-371b-5p	2.87582	1.52397	0.088032	0.926326	9.49478	5.19083	0.348684	18.0239	11.5284	13.8836
hsa-miR-4733-5p	5.40466	2.4342	0.0902623	0.945046	0.19989	0	0.557894	0.375498	1.32097	2.39808
hsa-miR-3170	-2.55315	-1.35228	0.0915109	0.953353	11.3937	21.9961	7.67104	7.0093	4.44325	4.60683
hsa-miR-8062	-2.85002	-1.51097	0.0925027	0.956399	14.5254	6.6183	8.01972	7.44738	2.40176	0.378644
hsa-miR-1225-5p	5.24739	2.3916	0.0927168	0.956399	0.233205	0	0.20921	0.250332	1.98145	0.252429
hsa-miR-6850-3p	2.85242	1.51219	0.0940298	0.957839	9.62804	44.7709	22.9434	171.54	21.3756	27.641
hsa-miR-555	-2.76402	-1.46677	0.0933183	0.957839	49.4062	5.45037	4.39341	5.06923	7.9258	8.45638
hsa-miR-4754	-3.52956	-1.81949	0.0942287	0.957839	1.36592	10.187	1.39473	1.81491	1.32097	0.504858
hsa-miR-138-5p	2.66616	1.41476	0.0948791	0.959791	1037.93	366.343	2417.7	4047.56	3620.47	2521.89
hsa-miR-9898	-4.20239	-2.07121	0.0993746	0.960267	2.29874	5.96945	0.20921	1.12649	0.180132	0.69418
hsa-miR-596	2.48511	1.31331	0.0970699	0.960267	31.7159	24.5915	12.8316	58.8281	70.1313	43.2916
hsa-miR-1915-5p	-2.76279	-1.46613	0.097687	0.960267	5.59693	32.1831	6.20657	5.13181	1.74127	9.02434
hsa-miR-196b-3p	-3.9592	-1.98521	0.0969596	0.960267	4.13106	2.46564	0.557894	1.06391	0.240176	0.504858
hsa-miR-3928-3p	3.66273	1.87292	0.0995119	0.960267	1.69907	0.519083	0.767104	5.94539	1.86136	3.53401
hsa-miR-4800-5p	-3.63357	-1.86139	0.099103	0.960267	7.66246	0.259541	3.90526	1.25166	1.74127	0.252429
hsa-miR-569	-6.11054	-2.6113	0.0989129	0.960267	1.46586	0	0.139473	0	0.0600439	0.189322
hsa-miR-8074	-4.82324	-2.27	0.0976195	0.960267	1.53249	1.03817	0.139473	0.125166	0.180132	0.252429
hsa-miR-202-5p	3.2862	1.71642	0.0989093	0.960267	1.96559	0.0648853	3.20789	9.07454	4.08299	4.10197
hsa-miR-1226-5p	4.24494	2.08574	0.0978303	0.960267	0.39978	0.194656	0.976314	1.06391	2.64193	2.83983
hsa-miR-4722-3p	-2.45162	-1.29373	0.101096	0.971075	37.6127	79.0303	9.83288	16.7097	14.2304	20.6361
hsa-miR-6503-3p	-3.88464	-1.95778	0.102071	0.975327	2.59857	3.56869	1.74342	0.187749	1.38101	0.441751
hsa-miR-3907	-5.19712	-2.37771	0.10247	0.975327	0.13326	6.35876	0.0697367	0.750996	0.30022	0.189322
hsa-miR-182-3p	-2.81711	-1.49421	0.103282	0.978605	24.1867	48.5991	0.627631	12.2663	8.22601	5.55344
hsa-miR-4462	-3.2555	-1.70288	0.105653	0.996563	5.13051	14.3397	0.906578	0.062583	1.32097	4.85926
hsa-miR-10522-5p	-3.32674	-1.73411	0.107212	0.998219	6.4298	3.56869	2.85921	0.312915	2.16158	1.38836
hsa-miR-4652-5p	4.88662	2.28884	0.108034	0.998219	1.03277	0	0.139473	1.81491	0.120088	4.03887
hsa-miR-4723-5p	2.41587	1.27254	0.106587	0.998219	5.16383	6.48853	8.22893	14.3941	27.6202	5.93208
hsa-miR-5001-3p	2.43215	1.28223	0.108029	0.998219	16.1578	2.33587	5.29999	20.715	11.0481	26.3788
hsa-miR-5590-5p	4.22782	2.07991	0.108212	0.998219	0.0666301	0.129771	2.23158	3.25432	1.80132	5.11169
hsa-miR-548c-3p	-3.03807	-1.60316	0.109867	0.999238	6.62969	9.66791	1.74342	4.19306	0.600439	1.13593
hsa-miR-6750-5p	-2.42028	-1.27518	0.109239	0.999238	36.4133	57.6831	5.36973	15.458	14.6507	10.9807
hsa-miR-4707-3p	3.59157	1.84461	0.109415	0.999238	1.66575	0.713739	1.88289	0.563247	12.7894	2.01943
hsa-miR-128-1-5p	-2.42274	-1.27664	0.110231	0.999238	8.89511	43.9274	10.8092	11.1398	8.58628	6.50005
hsa-miR-548ac	2.09138	1.06445	0.367937	0.999762	1.73238	0	4.53289	4.56856	5.94435	2.5874
hsa-miR-548ae-3p	-1.25714	-0.330149	0.730064	0.999762	1.53249	3.958	4.11447	3.19173	1.98145	2.33497
hsa-miR-548aa	1.5217	0.605686	0.593225	0.999762	4.4309	2.46564	0.20921	1.37683	2.70198	6.81559
hsa-miR-548as-3p	2.61824	1.3886	0.113397	0.999762	2.53194	2.2061	3.4171	12.3914	4.14303	4.79615
hsa-miR-548at-3p	2.77074	1.47027	0.233321	0.999762	1.26597	0.259541	1.60394	0.250332	6.00439	2.46118
hsa-miR-548ad-3p	1.36619	0.450163	0.709483	0.999762	1.26597	0.519083	1.88289	0.62583	1.9214	2.46118
hsa-miR-424-3p	1.61613	0.692548	0.300461	0.999762	124.632	90.3204	279.854	196.573	191.24	411.775
hsa-miR-548a-3p	-1.81031	-0.856236	0.306146	0.999762	3.29819	12.0038	2.92894	3.19173	3.30241	3.53401
hsa-miR-5582-3p	1.37739	0.461935	0.71213	0.999762	1.79901	0.129771	3.62631	4.4434	2.76202	0.441751
hsa-miR-548e-5p	2.582	1.36849	0.172679	0.999762	2.39868	3.30915	0.836841	0.750996	8.94654	7.25734
hsa-miR-548n	-1.15647	-0.209732	0.772396	0.999762	13.0595	24.0725	25.2447	23.9067	11.2282	18.6798
hsa-miR-548az-5p	1.55121	0.633394	0.483858	0.999762	2.89841	1.68702	4.46315	5.75764	2.76202	5.49033
hsa-miR-4668-3p	-1.02359	-0.0336442	0.965006	0.999762	9.02837	3.50381	6.62499	4.75631	6.845	7.25734
hsa-miR-3662	-1.24794	-0.319545	0.768535	0.999762	5.13051	0.0648853	9.13551	5.44472	4.26312	1.767
hsa-miR-497-3p	1.66617	0.736535	0.484084	0.999762	3.29819	6.29388	0.348684	0.876162	11.3483	4.3544
hsa-miR-6771-3p	2.40664	1.26702	0.156914	0.999762	5.83013	15.1183	4.81183	49.7535	11.0481	1.19904
hsa-miR-1537-3p	-1.17148	-0.228332	0.762906	0.999762	18.9896	25.1106	9.27499	16.7723	12.4891	16.3448
hsa-miR-7844-5p	-1.73236	-0.792742	0.550321	0.999762	3.03167	0	2.78947	0.250332	0.960702	2.14565
hsa-miR-548av-3p	-1.90038	-0.92629	0.361791	0.999762	9.29489	9.66791	0.627631	2.25299	0.420307	7.63598
hsa-miR-186-5p	1.42256	0.50849	0.500689	0.999762	15.6914	2.40076	20.7118	17.1478	21.856	16.2186
hsa-miR-548u	-1.01915	-0.0273713	0.970061	0.999762	9.99451	12.9771	4.7421	10.3262	7.20527	9.71852
hsa-miR-4311	-1.66947	-0.739386	0.412491	0.999762	9.16163	4.8664	2.37105	1.37683	4.26312	4.22819
hsa-miR-1276	3.2061	1.68082	0.115435	0.999762	2.86509	0	2.58026	6.32089	4.80351	6.43694
hsa-miR-583	-2.22084	-1.1511	0.303669	0.999762	7.96229	0.259541	3.76578	3.81757	1.14083	0.441751
hsa-miR-6835-3p	-1.19144	-0.25271	0.783279	0.999762	5.93008	2.98472	5.16052	5.63247	1.62119	4.60683
hsa-miR-4422	1.90405	0.929071	0.233651	0.999762	24.2867	36.9197	9.20525	40.4286	52.1782	41.5246
hsa-miR-518a-3p	1.27192	0.347003	0.791673	0.999762	0.499725	0.0648853	2.85921	0.688413	1.86136	1.767
hsa-miR-320a-3p	1.00087	0.00125206	0.998895	0.999762	676.995	275.503	2017.2	403.222	1117.24	1451.78
hsa-miR-548an	1.1755	0.233279	0.873932	0.999762	0.0999451	0.389312	1.95263	0.125166	2.52184	0.189322
hsa-miR-6768-3p	1.66378	0.734463	0.440833	0.999762	8.79517	0.194656	2.85921	6.32089	6.30461	7.19423
hsa-miR-4484	1.57424	0.654655	0.614876	0.999762	1.3326	0.129771	0.976314	2.50332	1.08079	0.315536
hsa-miR-548m	1.86006	0.89535	0.416802	0.999762	4.69742	0.324427	1.25526	2.5659	1.80132	7.44666
hsa-miR-548a-5p	1.29453	0.372433	0.616244	0.999762	18.29	11.7442	30.7539	29.9147	30.022	18.6798
hsa-miR-548av-5p	1.47298	0.558735	0.461112	0.999762	16.9907	10.8358	48.2578	37.1743	35.6661	39.1265
hsa-miR-548l	1.3018	0.380507	0.677958	0.999762	2.432	3.958	5.02104	7.3848	5.28386	2.08254
hsa-miR-6507-3p	-1.37417	-0.458562	0.642487	0.999762	1.66575	7.85112	4.1842	6.00797	1.08079	2.83983
hsa-miR-3609	2.44621	1.29055	0.275289	0.999762	2.53194	0	4.39341	13.3302	2.94215	0.69418
hsa-miR-106a-5p	1.04009	0.0567015	0.947589	0.999762	447.088	166.042	1057	555.988	560.51	620.534
hsa-miR-548at-5p	-3.36671	-1.75134	0.160115	0.999762	3.06498	4.08778	2.71973	0.688413	2.22162	0
hsa-miR-561-3p	1.05705	0.0800491	0.930383	0.999762	4.16438	4.02289	1.67368	3.3169	4.74347	2.46118
hsa-miR-5692a	-1.66503	-0.735547	0.537193	0.999762	4.23101	5.58014	0.278947	0.813579	4.9236	0.315536
hsa-miR-3121-3p	-1.85147	-0.888672	0.424493	0.999762	4.13106	4.80151	0.20921	3.56723	0.360263	1.00972
hsa-miR-551b-5p	-1.35012	-0.43309	0.697548	0.999762	0.33315	3.76335	5.99736	5.38214	1.68123	0.378644
hsa-miR-605-5p	-1.5304	-0.613912	0.389231	0.999762	17.4238	8.69463	29.8473	12.7669	12.9094	10.8545
hsa-miR-3646	-2.78746	-1.47895	0.189962	0.999762	1.86564	5.90456	3.13815	0.62583	3.0022	0.252429
hsa-miR-1252-3p	-1.78332	-0.834565	0.499975	0.999762	3.0983	0.0648853	1.95263	2.12782	0.240176	0.504858
hsa-miR-224-3p	-1.64322	-0.716523	0.60908	0.999762	2.79846	0.0648853	1.11579	1.94007	0.240176	0.252429
hsa-miR-10a-3p	1.31332	0.393221	0.624791	0.999762	33.2484	20.7633	66.5986	57.7016	50.4969	50.1072
hsa-miR-495-3p	-1.12686	-0.172314	0.836957	0.999762	26.1856	90.6448	35.2171	45.7482	41.07	48.0246
hsa-miR-7-1-3p	1.4162	0.502028	0.538676	0.999762	21.1884	26.7976	88.9841	88.9305	51.1574	53.7674
hsa-miR-122b-3p	-1.26075	-0.334279	0.687438	0.999762	47.907	12.0687	81.2433	46.1863	31.1027	34.709
hsa-miR-141-3p	2.15009	1.1044	0.301598	0.999762	4.03112	1.68702	0.20921	4.25565	4.14303	4.54372
hsa-miR-132-3p	1.24839	0.320069	0.616983	0.999762	111.139	160.202	406.286	361.918	188.178	295.721
hsa-miR-4803	-1.56686	-0.64788	0.627033	0.999762	2.16548	3.24427	0	1.37683	0.180132	1.89322
hsa-miR-543	1.45751	0.543507	0.481155	0.999762	30.9163	32.5075	88.5657	72.5963	44.3724	104.443
hsa-miR-6776-3p	1.42245	0.508376	0.663623	0.999762	4.23101	0.129771	3.06842	0.187749	6.24457	4.16508
hsa-miR-652-5p	1.40417	0.489722	0.694449	0.999762	2.13216	0.0648853	1.81316	2.69107	0.840615	2.14565
hsa-miR-6732-3p	1.66267	0.733505	0.550694	0.999762	4.46421	0.0648853	0.697367	1.62716	1.86136	5.30101
hsa-miR-451a	1.43585	0.521903	0.425501	0.999762	105.542	109.786	146.447	137.307	139.182	242.837
hsa-miR-3150a-5p	-2.41047	-1.26931	0.164391	0.999762	25.6526	97.5226	2.85921	15.8335	19.3942	17.039
hsa-miR-649	-1.04695	-0.0661941	0.942272	0.999762	6.09665	2.53053	3.55657	3.37948	3.66268	4.79615
hsa-miR-614	-1.45383	-0.539854	0.496292	0.999762	9.19495	19.5305	1.88289	5.13181	10.988	4.92237
hsa-miR-523-3p	-1.13267	-0.179723	0.869747	0.999762	8.36207	0.0648853	3.4171	6.57122	2.52184	1.38836
hsa-miR-191-5p	1.38153	0.466268	0.560065	0.999762	924.992	684.021	2477.12	1664.9	1648.87	2331.25
hsa-miR-4485-3p	-1.58453	-0.664052	0.433176	0.999762	10.2943	29.0037	5.57894	17.8362	2.58189	7.88841
hsa-miR-337-5p	-1.10166	-0.139675	0.83103	0.999762	213.349	118.545	392.13	128.984	296.076	232.109
hsa-miR-3129-3p	-2.12743	-1.08911	0.406321	0.999762	0.26652	1.42748	3.4171	1.68974	0.30022	0.378644
hsa-miR-708-3p	3.57497	1.83793	0.148481	0.999762	0.0999451	0.194656	1.46447	2.00266	2.28167	1.83011
hsa-miR-618	1.31638	0.396581	0.679469	0.999762	7.7624	0.194656	11.5763	6.2583	11.8887	7.57287
hsa-miR-582-3p	-2.42692	-1.27912	0.162114	0.999762	1.7657	15.1183	3.27763	1.31424	3.36246	3.59712
hsa-miR-548b-3p	-2.86955	-1.52082	0.294886	0.999762	1.93227	0.194656	1.46447	0	0.360263	0.883502
hsa-miR-4511	3.7033	1.88881	0.129203	0.999762	1.26597	0	1.81316	2.81624	3.4225	5.2379
hsa-miR-6507-5p	-1.73653	-0.796208	0.547907	0.999762	0.899506	4.60686	0.488157	3.12915	0.180132	0.126215
hsa-miR-3617-5p	1.02842	0.0404324	0.957535	0.999762	7.36262	6.55342	6.0671	5.94539	6.06443	8.77191
hsa-miR-548ao-3p	-1.29874	-0.377112	0.725669	0.999762	1.7657	7.13739	1.25526	3.06657	2.82206	1.89322
hsa-miR-4432	-1.21329	-0.278926	0.83988	0.999762	0.433095	0.259541	4.67236	0.375498	0.360263	3.66022
hsa-miR-8087	2.24627	1.16753	0.288585	0.999762	1.06608	3.1145	0.488157	4.69373	5.28386	0.504858
hsa-miR-4662a-3p	-1.00572	-0.00822935	0.992027	0.999762	4.49753	10.5114	3.76578	10.3262	6.48474	1.83011
hsa-miR-3156-5p	1.55654	0.63834	0.4455	0.999762	2.96504	4.02289	7.53157	3.75498	6.30461	12.4321
hsa-miR-4426	1.75842	0.814276	0.36515	0.999762	9.7613	10.187	0.697367	15.8335	16.9324	3.59712
hsa-miR-10527-5p	2.39902	1.26244	0.245879	0.999762	2.33205	0.129771	2.0921	4.69373	4.68342	1.64079
hsa-miR-7109-3p	1.43408	0.520121	0.466394	0.999762	11.4271	8.56486	8.1592	15.0199	13.8101	12.2428
hsa-miR-518e-3p	-1.85629	-0.892426	0.531751	0.999762	0.13326	3.43892	1.53421	0.062583	2.28167	0.378644
hsa-miR-99a-3p	-1.55882	-0.640456	0.338436	0.999762	289.174	539.651	202.027	159.587	236.573	265.114
hsa-miR-6796-3p	2.60317	1.38027	0.314918	0.999762	1.23266	0	0.976314	1.62716	0.420307	3.78644
hsa-miR-320e	-1.19063	-0.251719	0.78258	0.999762	30.6498	18.103	124.271	13.0173	48.3353	83.9327
hsa-miR-100-3p	-1.15884	-0.212679	0.759245	0.999762	27.7514	17.7137	14.0868	18.9001	11.5885	21.0778
hsa-miR-12120	1.78195	0.83346	0.325399	0.999762	3.49808	2.6603	4.95131	4.88148	5.8843	8.96123
hsa-miR-8080	1.42592	0.511895	0.686298	0.999762	3.89786	0.194656	0.139473	1.25166	2.10154	2.77672
hsa-miR-6816-3p	-2.11079	-1.07778	0.287124	0.999762	0.13326	18.1679	4.39341	3.50465	4.44325	2.77672
hsa-miR-4428	-1.54069	-0.623576	0.48492	0.999762	12.06	9.66791	8.85657	16.6471	2.82206	0.378644
hsa-miR-12118	1.35885	0.442385	0.683546	0.999762	7.46257	0.583968	1.18552	8.51129	3.66268	0.441751
hsa-miR-541-5p	-1.07396	-0.10294	0.89718	0.999762	29.5171	37.8281	12.7618	51.1929	13.63	9.78163
hsa-miR-124-3p	-1.85497	-0.891398	0.453779	0.999762	3.26487	1.68702	1.04605	2.06524	0.180132	1.00972
hsa-miR-3714	-2.08909	-1.06287	0.272396	0.999762	5.43035	6.09922	1.39473	1.94007	3.36246	0.883502
hsa-miR-4753-5p	-1.28384	-0.360471	0.665413	0.999762	3.7646	17.9083	4.11447	13.0173	3.06224	3.97576
hsa-miR-4475	1.57353	0.654005	0.437557	0.999762	14.0256	34.6488	7.18288	14.8322	48.9958	24.0439
hsa-miR-3936	1.59177	0.670635	0.57756	0.999762	2.33205	1.10305	0.557894	4.4434	1.62119	0.378644
hsa-miR-548ag	-1.918	-0.939601	0.4834	0.999762	0.13326	4.08778	1.95263	0.062583	0.420307	2.71361
hsa-miR-3974	-2.45419	-1.29525	0.152901	0.999762	2.79846	14.6641	1.74342	2.75365	2.58189	2.46118
hsa-miR-18a-5p	-1.12812	-0.173921	0.818233	0.999762	16.8241	3.82823	24.896	17.9613	7.20527	15.2089
hsa-miR-562	1.22955	0.298127	0.745391	0.999762	7.69577	2.01144	2.78947	10.7017	1.14083	3.59712
hsa-miR-3184-3p	-2.04444	-1.0317	0.397572	0.999762	1.46586	2.27099	0.836841	0.563247	0.840615	0.820395
hsa-miR-1264	1.34469	0.427272	0.581287	0.999762	22.4543	14.0152	4.60262	15.1451	17.5328	22.7186
hsa-miR-519a-3p	1.35987	0.443473	0.694857	0.999762	2.86509	1.10305	1.04605	2.75365	1.80132	2.52429
hsa-miR-302a-3p	1.3038	0.38272	0.626368	0.999762	5.5303	5.25571	13.9473	15.1451	14.5907	2.46118
hsa-miR-12117	-1.07076	-0.098641	0.929167	0.999762	2.36537	3.04961	1.95263	3.62982	0.540395	2.71361
hsa-miR-595	-2.37333	-1.24691	0.185654	0.999762	17.8902	43.2136	0.557894	12.7044	3.48255	9.78163
hsa-miR-148a-5p	1.30994	0.3895	0.635182	0.999762	5.96339	2.07633	7.81051	10.8894	6.60483	3.28158
hsa-miR-495-5p	1.13387	0.181256	0.810337	0.999762	61.9326	28.5495	75.5249	87.3033	41.1901	59.7626
hsa-miR-382-5p	1.06227	0.0871452	0.894943	0.999762	340.146	259.022	623.167	375.936	468.463	453.931
hsa-miR-6082	-2.1374	-1.09586	0.344992	0.999762	7.99561	0.129771	1.88289	0.438081	0.780571	3.4709
hsa-miR-8084	-1.78464	-0.835636	0.552661	0.999762	3.39813	0	0.836841	0.750996	0.180132	1.45147
hsa-miR-200b-3p	1.08668	0.119922	0.876889	0.999762	5.7635	5.45037	5.5092	7.57255	7.32536	3.28158
hsa-miR-4517	-1.02884	-0.0410255	0.964363	0.999762	3.36482	4.67174	2.92894	4.56856	2.16158	3.91265
hsa-miR-5583-3p	-2.9519	-1.56164	0.261537	0.999762	0.233205	5.38548	0.20921	0.375498	1.32097	0.252429
hsa-miR-34b-3p	1.47349	0.559235	0.498097	0.999762	14.9918	13.8855	39.0526	17.0226	24.4979	58.5005
hsa-miR-34a-3p	1.51884	0.602974	0.46716	0.999762	6.79627	6.29388	11.0184	23.9067	3.60263	9.08745
hsa-miR-500a-5p	-1.50237	-0.587237	0.512399	0.999762	5.29709	4.4122	6.97367	3.3169	4.80351	2.90294
hsa-miR-3610	-1.80035	-0.848275	0.324402	0.999762	4.6641	20.2442	2.85921	5.06923	2.88211	7.44666
hsa-miR-216a-5p	-1.34482	-0.427409	0.613286	0.999762	1.63244	8.56486	8.85657	5.63247	6.06443	2.39808
hsa-miR-216b-5p	-1.37644	-0.460942	0.646416	0.999762	2.59857	5.06106	1.81316	1.25166	1.20088	4.41751
hsa-miR-580-5p	-1.5445	-0.627144	0.455837	0.999762	4.76405	39.6449	2.65	11.703	7.50549	11.2331
hsa-miR-5700	2.68187	1.42324	0.262752	0.999762	1.06608	0.259541	0.348684	2.81624	1.44105	0.441751
hsa-miR-365a-3p	1.09653	0.132946	0.827	0.999762	173.771	194.072	259.351	169.976	234.592	282.973
hsa-miR-5197-5p	1.05587	0.0784355	0.956765	0.999762	0.0666301	2.6603	0.20921	1.43941	1.38101	0.252429
hsa-miR-4506	-2.13407	-1.09361	0.328829	0.999762	1.63244	9.08395	0.139473	1.25166	1.9214	1.89322
hsa-miR-513b-3p	-1.64421	-0.717391	0.556087	0.999762	0.299835	5.96945	2.44079	1.25166	3.12228	0.883502
hsa-miR-8066	-1.7047	-0.769515	0.475393	0.999762	3.16493	3.958	3.48684	0.062583	3.24237	2.90294
hsa-miR-409-3p	1.3876	0.472591	0.584047	0.999762	542.569	175.709	886.214	615.692	628.299	982.391
hsa-miR-33a-3p	1.33694	0.418939	0.582811	0.999762	10.2277	18.1679	5.29999	14.1438	12.6092	18.3011
hsa-miR-944	-1.00518	-0.00744766	0.994022	0.999762	4.79736	3.43892	0.976314	3.88015	3.48255	1.89322
hsa-miR-4760-3p	2.61823	1.38859	0.288004	0.999762	0.999451	0	0.836841	1.87749	1.62119	1.45147
hsa-miR-5571-5p	1.70636	0.770924	0.369988	0.999762	24.1201	41.851	17.5039	95.9398	17.4728	29.0294
hsa-miR-302f	3.39106	1.76174	0.168264	0.999762	0.0666301	0.0648853	3.69605	4.13048	4.56334	4.22819
hsa-miR-32-3p	-1.10885	-0.149063	0.842834	0.999762	9.16163	10.5114	4.53289	4.25565	8.40615	9.21366
hsa-miR-590-3p	1.27454	0.34998	0.622022	0.999762	88.5514	35.2976	190.451	159.524	132.157	108.86
hsa-miR-3529-3p	1.54086	0.623739	0.621256	0.999762	2.93172	0.0648853	0.976314	2.00266	1.38101	2.83983
hsa-miR-624-3p	-2.07678	-1.05435	0.163941	0.999762	26.6187	23.8778	12.3434	18.1491	4.74347	7.38355
hsa-miR-6882-5p	-1.12965	-0.175873	0.820854	0.999762	9.82793	15.6374	8.29867	13.956	12.249	3.66022
hsa-miR-10523-5p	-1.20839	-0.273081	0.784026	0.999762	2.69852	4.02289	2.51052	1.56458	1.08079	4.98548
hsa-miR-7849-3p	-1.11676	-0.159314	0.887922	0.999762	4.33095	0.389312	2.37105	2.37816	2.76202	1.26215
hsa-miR-8485	-1.40656	-0.492172	0.543387	0.999762	9.66136	6.35876	3.97499	6.19572	6.72492	1.32525
hsa-miR-329-3p	-1.66405	-0.734701	0.374397	0.999762	43.4428	101.286	32.2184	25.0332	46.1738	35.0876
hsa-miR-603	-2.90082	-1.53646	0.2958	0.999762	1.36592	0.0648853	2.85921	0.250332	1.08079	0.126215
hsa-miR-6768-5p	1.49188	0.577127	0.476185	0.999762	24.6864	12.3931	1.74342	19.964	21.856	16.2186
hsa-miR-4789-3p	2.20966	1.14383	0.217514	0.999762	6.56306	0.389312	3.76578	4.4434	9.8472	9.5292
hsa-miR-4643	-1.08883	-0.122773	0.881338	0.999762	12.3932	21.7366	3.76578	20.5272	7.02514	7.25734
hsa-miR-602	-1.44267	-0.528737	0.711609	0.999762	2.53194	0.194656	0.976314	0	0.240176	2.33497
hsa-miR-4704-5p	-1.14074	-0.189967	0.869635	0.999762	2.89841	0.713739	0.976314	1.68974	1.38101	1.07282
hsa-miR-6757-3p	1.11173	0.152804	0.89373	0.999762	8.46202	0	4.60262	2.00266	3.9629	8.58259
hsa-miR-4797-5p	2.6217	1.3905	0.326566	0.999762	0.932821	0.0648853	0.139473	0.688413	0.840615	1.7039
hsa-miR-5683	-2.5187	-1.33268	0.343315	0.999762	1.16603	0.324427	2.65	1.12649	0.120088	0.378644
hsa-miR-3120-3p	-1.5086	-0.593215	0.644184	0.999762	3.59802	0.0648853	3.90526	1.94007	2.88211	0.189322
hsa-miR-6856-3p	1.07535	0.104804	0.931932	0.999762	0.233205	2.91984	1.53421	2.87882	1.80132	0.315536
hsa-miR-552-3p	1.23788	0.307875	0.723817	0.999762	7.16273	5.19083	1.74342	2.19041	6.00439	9.33988
hsa-miR-101-3p	-1.30238	-0.381147	0.632874	0.999762	4.73073	6.94273	7.88025	4.69373	5.76421	4.2913
hsa-miR-144-3p	-1.04061	-0.0574295	0.965228	0.999762	4.13106	0.129771	0.488157	0.125166	1.32097	3.15536
hsa-miR-376c-3p	1.36356	0.447376	0.604887	0.999762	711.809	299.965	1530.02	988.749	1147.92	1329.17
hsa-miR-499a-3p	-1.12327	-0.167708	0.840625	0.999762	4.6641	13.4313	1.74342	3.81757	8.64632	5.1748
hsa-miR-4802-3p	1.79194	0.841522	0.360019	0.999762	3.29819	0.778624	13.9473	5.94539	17.5328	8.77191
hsa-miR-942-3p	1.97692	0.983252	0.196416	0.999762	5.3304	2.91984	8.50788	15.8961	8.04588	9.15056
hsa-miR-323a-3p	1.37368	0.458047	0.502459	0.999762	234.604	191.541	616.054	405.914	457.835	567.776
hsa-miR-181a-5p	1.43454	0.520593	0.55053	0.999762	4077.43	3029.43	14878	10323.1	9374.11	11840.9
hsa-miR-1255b-2-3p	-1.16347	-0.218435	0.790927	0.999762	12.06	45.9388	51.8144	25.221	59.3834	9.71852
hsa-miR-634	-1.50261	-0.587468	0.46155	0.999762	3.43145	6.48853	10.7395	3.37948	3.9629	6.31073
hsa-miR-1911-3p	1.44812	0.534178	0.580709	0.999762	5.26377	0.519083	15.5513	2.69107	11.5885	16.5972
hsa-miR-6753-5p	1.46184	0.547785	0.6054	0.999762	4.23101	0.454197	2.16184	2.87882	5.52404	1.7039
hsa-miR-181c-3p	1.58887	0.668004	0.404561	0.999762	4.6641	3.56869	8.99604	10.4514	7.86575	8.89813
hsa-miR-7153-3p	1.24871	0.320438	0.782549	0.999762	4.13106	84.0914	1.53421	100.195	7.26531	4.60683
hsa-miR-6512-5p	2.9904	1.58034	0.291384	0.999762	0.0999451	0.129771	0.0697367	0.876162	0.0600439	0
hsa-miR-1295b-5p	2.50086	1.32242	0.321221	0.999762	0.0999451	0.324427	1.81316	0.563247	4.14303	0.820395
hsa-miR-3130-5p	1.00867	0.0124555	0.986254	0.999762	38.1457	91.7478	79.2907	77.9159	77.1564	55.7237
hsa-miR-660-5p	-1.10652	-0.146033	0.864415	0.999762	39.8448	11.0305	94.4235	52.6949	35.546	43.0392
hsa-miR-4640-3p	1.52436	0.608204	0.450049	0.999762	11.8602	3.30915	17.7829	14.707	27.32	8.20395
hsa-miR-5195-5p	1.61163	0.688517	0.410651	0.999762	23.9535	19.0763	73.2933	98.1928	46.7742	42.4081
hsa-miR-941	1.61842	0.694585	0.296803	0.999762	73.6595	73.3853	161.859	183.118	123.33	193.298
hsa-miR-100-5p	1.55982	0.641378	0.48368	0.999762	28634.9	17279.3	65134.6	69745.5	47488	55982.3
hsa-miR-10a-5p	1.34089	0.423193	0.624823	0.999762	5274.77	1956.88	10381	5814.21	6451	11351.4
hsa-miR-6510-3p	1.47081	0.556612	0.499364	0.999762	2.23211	7.78624	2.37105	9.51262	2.04149	6.62626
hsa-miR-4523	-1.11062	-0.151367	0.876494	0.999762	6.82958	3.37404	1.11579	3.50465	1.20088	5.55344
hsa-miR-4655-5p	-1.02003	-0.028612	0.980799	0.999762	2.73183	0.583968	4.11447	0.438081	3.18233	3.66022
hsa-miR-6800-3p	-1.52276	-0.606688	0.645067	0.999762	0.26652	0.519083	2.02237	0.250332	0.720527	0.820395
hsa-miR-619-3p	1.69654	0.762595	0.300518	0.999762	5.96339	5.38548	11.646	6.2583	12.7894	19.8788
hsa-miR-7851-3p	1.72605	0.787473	0.338185	0.999762	3.79791	5.77479	1.95263	4.63114	10.928	4.3544
hsa-miR-3200-3p	-1.00688	-0.00989299	0.99235	0.999762	3.06498	52.1029	5.36973	53.7588	3.0022	3.34469
hsa-miR-6813-3p	1.55877	0.640407	0.62064	0.999762	19.8891	936.165	7.39209	1480.65	12.4891	8.6457
hsa-miR-6782-3p	2.41146	1.2699	0.26385	0.999762	1.3326	0.259541	3.20789	8.07321	3.12228	0.378644
hsa-miR-521	1.89475	0.922006	0.344183	0.999762	2.99835	11.6794	0.348684	2.5659	9.3068	16.5972
hsa-miR-122-3p	-1.1333	-0.180533	0.892464	0.999762	0.13326	1.36259	2.85921	0.125166	2.10154	1.57768
hsa-miR-3939	1.22237	0.289681	0.712513	0.999762	7.92898	4.60686	3.83552	5.06923	5.70417	9.46609
hsa-miR-574-3p	1.15673	0.210051	0.798385	0.999762	433.695	434.797	777.844	580.52	498.124	825.569
hsa-miR-4445-3p	-1.80266	-0.850131	0.518852	0.999762	1.16603	4.28243	1.25526	2.50332	0	1.19904
hsa-miR-433-5p	-1.56596	-0.647051	0.39783	0.999762	26.5854	36.0762	22.1763	15.3328	18.5536	20.2574
hsa-miR-1277-3p	1.33541	0.417281	0.600105	0.999762	6.76295	5.3206	6.41578	8.63646	4.9236	11.2331
hsa-miR-598-3p	1.66707	0.737313	0.384828	0.999762	4.23101	2.72518	10.8789	16.209	9.48694	3.97576
hsa-miR-4637	1.70883	0.773011	0.494157	0.999762	1.69907	0.389312	0.976314	2.06524	1.9214	1.51457
hsa-miR-28-3p	1.03691	0.0522967	0.936384	0.999762	320.191	281.083	485.437	422.686	290.733	413.29
hsa-miR-4661-5p	1.63931	0.713093	0.399554	0.999762	10.6275	43.6678	10.8789	67.6523	29.1813	9.97095
hsa-miR-625-3p	1.13894	0.187693	0.802632	0.999762	11.527	12.5229	14.5052	9.19971	16.8723	17.7331
hsa-miR-888-5p	1.65494	0.726777	0.590112	0.999762	2.76515	0	0.976314	1.00133	4.80351	0.441751
hsa-miR-3680-5p	-2.62284	-1.39113	0.188382	0.999762	5.13051	4.8664	2.65	2.19041	0.30022	2.33497
hsa-miR-512-5p	-1.04431	-0.0625436	0.960573	0.999762	0.19989	4.8664	1.46447	2.19041	3.84281	0.189322
hsa-miR-510-5p	2.61258	1.38548	0.208105	0.999762	2.83178	3.1145	0.20921	2.06524	0.840615	13.2525
hsa-miR-3145-5p	-1.24451	-0.315581	0.776832	0.999762	5.79682	0.0648853	2.65	3.3169	2.22162	1.32525
hsa-miR-508-5p	-1.01923	-0.0274841	0.970012	0.999762	11.8602	4.99617	6.76446	7.63513	10.3276	5.36412
hsa-miR-4636	2.63517	1.39789	0.130489	0.999762	7.36262	0.129771	13.4592	18.7749	17.6529	18.806
hsa-miR-5684	1.0057	0.0082051	0.991978	0.999762	44.3756	55.4121	15.1329	45.9359	41.7305	27.9565
hsa-miR-4714-5p	-1.44377	-0.529837	0.51335	0.999762	39.2451	62.6792	29.15	27.7869	25.999	36.9809
hsa-miR-514a-5p	-1.50524	-0.589998	0.471912	0.999762	71.9605	64.2365	17.4342	41.2422	27.6802	33.1944
hsa-miR-3664-5p	-1.26601	-0.340288	0.661669	0.999762	7.49588	18.103	11.5066	4.94406	12.6092	11.6748
hsa-miR-4724-5p	1.19597	0.258185	0.803242	0.999762	3.29819	5.90456	0.139473	2.62849	4.20307	4.3544
hsa-miR-888-3p	-1.38221	-0.466979	0.723302	0.999762	4.39758	0.0648853	1.46447	2.31557	1.9214	0.0631073
hsa-miR-4418	1.38912	0.474167	0.563632	0.999762	3.16493	4.8664	6.48552	4.4434	8.22601	7.25734
hsa-miR-3654	-1.48389	-0.56938	0.57328	0.999762	2.73183	13.1068	2.71973	11.0772	0.780571	0.631073
hsa-miR-193a-3p	1.07349	0.102304	0.902591	0.999762	729.199	533.552	1231.06	548.853	968.688	1159.47
hsa-miR-892b	1.16918	0.225496	0.768367	0.999762	22.0212	39.3205	6.97367	38.6137	22.2763	18.9953
hsa-miR-1183	-1.44774	-0.533802	0.515202	0.999762	7.0961	22.5152	6.27631	12.3914	5.10373	7.25734
hsa-miR-4318	1.41011	0.49581	0.586551	0.999762	1.93227	3.43892	4.7421	4.94406	4.02294	4.98548
hsa-miR-892a	-1.48448	-0.56996	0.685429	0.999762	1.23266	0.129771	2.16184	1.87749	0.360263	0.126215
hsa-miR-452-5p	1.20308	0.266728	0.822801	0.999762	2.93172	0.194656	1.74342	1.18908	1.26092	3.4709
hsa-miR-374c-3p	-1.04099	-0.0579498	0.953011	0.999762	2.36537	9.40837	1.67368	6.88413	2.34171	3.66022
hsa-miR-890	-1.85352	-0.890271	0.260976	0.999762	52.5045	52.7518	5.29999	18.8375	22.4564	18.3642
hsa-miR-12126	1.39038	0.475477	0.608754	0.999762	3.9978	5.06106	1.11579	3.6924	5.10373	5.42723
hsa-miR-5003-3p	-1.19765	-0.260204	0.825748	0.999762	3.86454	4.99617	0.278947	2.87882	4.50329	0.252429
hsa-miR-5680	1.26978	0.344574	0.805268	0.999762	3.0983	0.129771	0.20921	0	1.44105	2.96604
hsa-miR-4773	-1.73459	-0.794591	0.60729	0.999762	1.7657	0	3.34736	2.81624	0.120088	0
hsa-miR-5197-3p	-1.74084	-0.799783	0.411007	0.999762	3.26487	8.56486	2.0921	1.43941	4.44325	2.08254
hsa-miR-3154	1.27412	0.349503	0.699032	0.999762	7.5292	50.0915	3.62631	34.1078	24.0176	19.8788
hsa-miR-4524b-3p	2.08992	1.06345	0.173372	0.999762	6.16328	2.91984	3.06842	11.703	5.40395	8.6457
hsa-miR-483-5p	1.77877	0.830878	0.278279	0.999762	10.8607	3.30915	15.4118	20.6524	13.7501	18.238
hsa-miR-6863	-2.51626	-1.33128	0.139487	0.999762	5.49698	43.4083	2.02237	5.38214	6.12448	8.70881
hsa-miR-4499	2.40623	1.26677	0.251881	0.999762	6.46312	0.713739	0.0697367	9.19971	6.36465	2.01943
hsa-miR-4463	-1.07461	-0.103814	0.936216	0.999762	2.432	3.30915	0.348684	0.187749	5.16378	0.315536
hsa-miR-3925-5p	1.26294	0.336788	0.644916	0.999762	14.0256	29.7824	47.4907	46.3114	38.0678	30.7332
hsa-miR-6758-5p	-1.51098	-0.595483	0.560345	0.999762	0.13326	30.561	2.85921	4.0679	8.58628	9.5292
hsa-miR-6529-5p	1.47837	0.56401	0.675699	0.999762	1.46586	1.36259	0.139473	0.062583	2.34171	2.01943
hsa-miR-2278	-1.76154	-0.816837	0.533242	0.999762	4.13106	0	2.37105	1.68974	1.56114	0.441751
hsa-miR-6873-5p	-1.16724	-0.223097	0.797288	0.999762	17.3904	41.9808	2.23158	13.7057	25.999	13.0632
hsa-miR-12127	-1.25877	-0.332015	0.769878	0.999762	1.69907	3.30915	1.81316	1.94007	1.08079	2.33497
hsa-miR-5007-5p	2.2089	1.14333	0.261786	0.999762	2.16548	0.389312	2.99868	4.50598	2.82206	4.98548
hsa-miR-5586-3p	1.10444	0.143312	0.917631	0.999762	1.36592	0.0648853	1.46447	0.312915	2.70198	0.189322
hsa-miR-577	1.29624	0.374336	0.698777	0.999762	1.53249	7.5267	2.02237	6.88413	1.38101	6.0583
hsa-miR-5694	-1.20185	-0.265259	0.817071	0.999762	6.4298	0.0648853	3.20789	2.5659	2.88211	2.65051
hsa-miR-7161-3p	1.81411	0.859265	0.245778	0.999762	3.79791	13.1717	3.20789	16.0838	11.1682	9.27677
hsa-miR-548p	1.02741	0.0390073	0.979047	0.999762	1.43255	0	1.18552	1.37683	1.20088	0.126215
hsa-miR-451b	2.39474	1.25987	0.284075	0.999762	1.93227	0.259541	1.325	4.4434	1.5011	2.65051
hsa-miR-3942-5p	2.41314	1.27091	0.369953	0.999762	1.46586	0.0648853	0.278947	0.062583	1.20088	3.21847
hsa-miR-3908	1.16563	0.221108	0.824579	0.999762	6.03002	0.648853	4.53289	2.25299	7.26531	3.59712
hsa-miR-29a-3p	1.16528	0.220679	0.753594	0.999762	474.506	148.003	745.904	370.679	697.77	526.125
hsa-miR-6871-3p	2.47346	1.30653	0.3101	0.999762	0.19989	0.389312	0.41842	0.312915	0.420307	1.7039
hsa-miR-15a-5p	1.10199	0.140115	0.869608	0.999762	4124.6	1374.47	6957.63	3973.46	4158.82	5594.9
hsa-miR-503-5p	1.69179	0.758551	0.372551	0.999762	41.9103	11.4198	68.1328	56.7002	59.7437	89.0444
hsa-miR-646	1.02158	0.0307995	0.974686	0.999762	1.86564	3.04961	3.76578	4.63114	1.98145	2.14565
hsa-miR-6510-5p	-1.58862	-0.66777	0.385238	0.999762	41.8104	39.7747	18.9684	28.0372	28.5809	6.68937
hsa-miR-4274	-1.16431	-0.219476	0.818716	0.999762	4.26432	6.87784	1.46447	6.38347	3.12228	1.32525
hsa-miR-4519	2.96324	1.56718	0.168855	0.999762	0.46641	0.519083	3.13815	4.56856	4.3832	3.09226
hsa-miR-1179	1.07421	0.103281	0.930956	0.999762	1.86564	0.259541	3.4171	2.87882	0.420307	2.65051
hsa-miR-449b-3p	2.12436	1.08703	0.165792	0.999762	4.03112	2.98472	5.29999	12.454	4.80351	8.89813
hsa-miR-4676-5p	-1.31785	-0.398189	0.630226	0.999762	6.12997	3.89312	6.41578	6.6338	2.58189	3.28158
hsa-miR-4323	-1.69491	-0.76121	0.441008	0.999762	3.89786	3.69846	1.95263	1.06391	2.28167	2.33497
hsa-miR-3943	1.44031	0.526375	0.643753	0.999762	2.23211	5.25571	0.41842	0.938746	2.88211	7.57287
hsa-miR-6769a-3p	-1.87191	-0.904513	0.336619	0.999762	2.83178	10.4465	3.55657	1.18908	3.66268	4.10197
hsa-miR-3940-3p	1.59279	0.671556	0.387383	0.999762	6.49643	5.77479	4.7421	9.5752	9.48694	8.96123
hsa-miR-4687-5p	-1.08122	-0.112666	0.887375	0.999762	6.36317	20.0496	9.97235	7.3848	5.58408	20.6361
hsa-miR-6779-3p	1.21644	0.28266	0.776296	0.999762	2.26542	4.4122	3.06842	1.43941	3.30241	7.06802
hsa-miR-129-1-3p	1.07155	0.0996933	0.892175	0.999762	20.4887	20.6984	23.9197	15.9587	19.6944	34.0779
hsa-miR-6746-3p	-1.13314	-0.180324	0.802606	0.999762	21.888	14.9236	8.57762	5.38214	13.0295	21.7089
hsa-miR-6819-3p	-1.3789	-0.463518	0.566202	0.999762	40.078	52.1678	26.4302	43.9333	19.9946	22.1507
hsa-miR-4293	-1.52289	-0.606814	0.515079	0.999762	2.6652	4.73663	6.41578	1.37683	5.16378	2.46118
hsa-miR-3614-3p	-1.50376	-0.588571	0.511201	0.999762	9.16163	6.68319	1.18552	0.62583	3.9629	6.75248
hsa-miR-4670-5p	-4.21592	-2.07585	0.212126	0.999762	2.86509	0	0	0.062583	0.540395	0.0631073
hsa-miR-7846-3p	1.24412	0.31513	0.744839	0.999762	5.86345	2.53053	0.627631	4.0679	2.16158	5.11169
hsa-miR-4781-5p	-1.71466	-0.777926	0.356672	0.999762	14.1256	62.3548	4.11447	19.6511	14.7708	12.5583
hsa-miR-6854-5p	1.43977	0.525839	0.476502	0.999762	16.3244	16.416	21.3394	20.0892	27.9204	29.5973
hsa-miR-22-3p	1.33695	0.418944	0.63794	0.999762	10824.5	3920.18	20256.4	9099.2	16093.4	21601.9
hsa-miR-21-5p	1.23843	0.308513	0.654243	0.999762	246939	137530	633499	281342	423491	555849
hsa-miR-4453	2.01519	1.01091	0.20972	0.999762	5.86345	6.6183	3.48684	20.4021	1.98145	9.84474
hsa-miR-208a-5p	1.24034	0.310739	0.675483	0.999762	197.558	90.1257	627.212	180.928	430.395	523.412
hsa-miR-4496	-2.01425	-1.01025	0.308125	0.999762	3.3315	14.0801	5.29999	1.87749	9.24676	0.126215
hsa-miR-12124	-1.2996	-0.378066	0.813525	0.999762	0	0	3.48684	0.62583	0.900659	1.13593
hsa-miR-3914	-1.49153	-0.576796	0.555288	0.999762	4.53084	3.56869	4.81183	3.94273	4.32316	0.378644
hsa-miR-4476	-1.82359	-0.866784	0.294965	0.999762	9.62804	12.0038	3.4171	5.63247	5.52404	2.5874
hsa-miR-1197	-2.0831	-1.05873	0.183945	0.999762	9.06169	6.16411	6.41578	4.88148	3.0022	2.5874
hsa-miR-4759	-2.23206	-1.15838	0.321232	0.999762	0.0999451	10.3817	0.836841	1.12649	2.34171	1.57768
hsa-miR-3169	-1.84843	-0.886298	0.320333	0.999762	2.09885	45.9388	3.06842	10.8269	6.00439	10.7913
hsa-miR-8083	-1.56454	-0.645739	0.603362	0.999762	1.19934	7.85112	1.74342	6.44605	0.120088	0.315536
hsa-miR-6888-5p	-1.75978	-0.815394	0.364699	0.999762	3.73128	10.6412	2.99868	4.19306	1.86136	3.78644
hsa-miR-28-5p	1.24707	0.318543	0.648583	0.999762	221.145	102.649	438.016	255.464	337.327	357.187
hsa-miR-4433b-3p	-2.07478	-1.05296	0.264734	0.999762	4.76405	4.54197	5.23026	1.87749	4.02294	1.07282
hsa-miR-10524-5p	-1.46291	-0.548839	0.593034	0.999762	4.33095	3.43892	2.44079	3.50465	1.86136	1.7039
hsa-miR-2392	1.77971	0.831645	0.180419	0.999762	118.502	117.767	146.308	170.664	327.78	182.317
hsa-miR-1265	1.17755	0.235786	0.759508	0.999762	13.426	9.92745	10.4605	9.5752	9.8472	20.5099
hsa-miR-3159	-1.03346	-0.0474891	0.965728	0.999762	7.59583	1.10305	0.20921	4.4434	1.14083	3.09226
hsa-miR-5582-5p	-2.11902	-1.0834	0.460985	0.999762	1.89896	0.194656	0	0.563247	0.120088	0.315536
hsa-miR-3622a-5p	-1.46434	-0.550249	0.646472	0.999762	4.89731	0.129771	3.27763	0.563247	2.34171	2.77672
hsa-miR-1910-3p	4.25252	2.08832	0.127639	0.999762	0.0999451	0.0648853	0.41842	0.563247	1.74127	0.126215
hsa-miR-6808-5p	-1.02521	-0.0359188	0.961847	0.999762	14.8252	12.458	17.7829	5.13181	28.5209	10.2865
hsa-miR-2682-5p	1.01383	0.0198099	0.984059	0.999762	2.79846	4.28243	2.85921	3.56723	1.74127	4.73305
hsa-miR-4717-5p	1.52791	0.611557	0.46563	0.999762	4.73073	5.45037	3.76578	2.19041	8.3461	10.7913
hsa-miR-4747-3p	-1.50325	-0.588084	0.457655	0.999762	10.1944	6.87784	4.60262	2.00266	4.3832	8.07773
hsa-miR-1245b-5p	-1.45152	-0.537563	0.536459	0.999762	13.0595	3.17938	7.18288	9.9507	1.74127	4.48062
hsa-miR-3186-5p	-1.53604	-0.61922	0.535688	0.999762	3.53139	8.62975	1.325	3.37948	0.720527	4.66994
hsa-miR-3929	1.31597	0.396132	0.71991	0.999762	3.26487	0	6.76446	3.00399	4.32316	5.86898
hsa-miR-5584-5p	-2.03811	-1.02723	0.416763	0.999762	1.16603	7.00761	0.0697367	1.18908	1.32097	1.51457
hsa-miR-9500	-1.91242	-0.935398	0.263468	0.999762	15.1917	57.0991	4.7421	14.6444	10.0273	15.5875
hsa-miR-7845-5p	-1.97457	-0.981537	0.270057	0.999762	28.2511	25.0457	1.18552	12.5166	11.2282	3.84954
hsa-miR-6757-5p	2.17144	1.11865	0.223677	0.999762	4.09775	0.583968	4.46315	8.26096	7.3854	4.2913
hsa-miR-4761-3p	2.92075	1.54634	0.261522	0.999762	0.0666301	0.194656	0.20921	0.062583	1.08079	0.189322
hsa-miR-6895-5p	-1.49924	-0.58423	0.600959	0.999762	1.79901	9.47326	0.557894	6.57122	0.420307	0.883502
hsa-miR-7160-3p	1.09248	0.127605	0.888823	0.999762	4.06443	2.46564	6.13683	4.00531	3.18233	6.62626
hsa-miR-4512	-1.09577	-0.131951	0.89769	0.999762	2.79846	4.73663	2.02237	2.69107	2.22162	3.78644
hsa-miR-3141	-2.14303	-1.09965	0.140428	0.999762	8.52865	41.3968	7.94999	8.57388	11.7686	6.62626
hsa-miR-5088-5p	-2.10649	-1.07484	0.266667	0.999762	6.26323	8.75952	2.0921	2.87882	1.02075	4.22819
hsa-miR-4446-3p	1.16029	0.214484	0.809838	0.999762	25.2528	61.3815	58.1604	6.69638	53.7393	107.535
hsa-miR-6783-5p	1.45186	0.537902	0.468559	0.999762	58.2347	75.9807	17.225	72.5963	79.318	68.0297
hsa-miR-4688	1.42583	0.511802	0.661455	0.999762	1.56581	0.259541	1.81316	2.25299	2.70198	0.252429
hsa-miR-6085	1.21306	0.278656	0.786611	0.999762	1.39923	0.648853	11.9947	2.81624	5.464	8.70881
hsa-miR-4716-3p	-1.47623	-0.561917	0.612599	0.999762	1.96559	7.59158	1.39473	1.56458	0.660483	5.1748
hsa-miR-6805-5p	2.02412	1.0173	0.308669	0.999762	2.56526	0.389312	4.88157	4.31823	7.68562	3.84954
hsa-miR-6732-5p	2.25409	1.17255	0.397064	0.999762	0.0999451	1.94656	0.278947	0.938746	0.120088	4.16508
hsa-miR-6782-5p	1.67402	0.743319	0.510441	0.999762	2.432	2.6603	0.627631	1.43941	1.38101	6.81559
hsa-miR-6841-5p	-2.12572	-1.08795	0.406798	0.999762	0.233205	0.129771	0.906578	0.125166	0.180132	0.252429
hsa-miR-6755-5p	2.08187	1.05788	0.351971	0.999762	3.3315	0.324427	3.4171	3.44207	0.540395	10.7913
hsa-miR-1178-5p	1.0438	0.0618434	0.959472	0.999762	3.9978	1.16794	0.139473	3.12915	0.960702	1.51457
hsa-miR-296-3p	1.44838	0.534444	0.520096	0.999762	45.1752	35.622	10.8789	61.2688	32.7239	38.9372
hsa-miR-3927-3p	1.29535	0.373347	0.615028	0.999762	54.8032	26.8625	157.675	99.1315	96.7307	114.098
hsa-miR-196a-5p	-2.0611	-1.04341	0.11553	0.999762	591.975	430.514	238.569	196.886	167.342	247.696
hsa-miR-370-5p	-1.42799	-0.51399	0.474778	0.999762	15.4915	10.9656	22.1065	15.0825	6.72492	12.1797
hsa-miR-431-3p	-2.37623	-1.24867	0.119542	0.999762	8.39539	10.3168	5.23026	5.88281	1.9214	2.27186
hsa-miR-12114	-1.12715	-0.172681	0.837583	0.999762	3.96449	21.6717	5.02104	11.2024	10.3276	5.61655
hsa-miR-6815-5p	1.62639	0.701674	0.354295	0.999762	5.93008	14.5343	10.7395	23.9693	10.2075	16.4079
hsa-miR-154-5p	1.62572	0.701078	0.325441	0.999762	156.914	180.965	531.812	763.513	293.314	356.935
hsa-miR-4464	1.401	0.486461	0.715076	0.999762	1.86564	0.0648853	3.06842	3.94273	3.0022	0.0631073
hsa-miR-329-5p	-1.01105	-0.0158548	0.989015	0.999762	2.46531	1.16794	2.92894	0.500664	3.84281	2.14565
hsa-miR-802	1.0066	0.00949204	0.993865	0.999762	2.53194	3.30915	0.0697367	0.813579	2.94215	2.20875
hsa-miR-624-5p	1.78943	0.839503	0.383183	0.999762	9.12832	0.259541	5.57894	16.209	5.28386	5.36412
hsa-miR-1278	1.95518	0.967304	0.425016	0.999762	7.62914	0.0648853	0.278947	13.0799	1.08079	1.51457
hsa-miR-411-5p	1.23978	0.310086	0.716634	0.999762	9394.57	10857.4	20067.4	15982.8	15998	18006.2
hsa-miR-1244	1.27845	0.354392	0.652494	0.999762	3.83123	18.2977	14.296	32.2928	8.3461	5.86898
hsa-miR-5588-3p	2.16277	1.11288	0.166368	0.999762	3.66465	4.73663	3.4171	16.209	3.24237	6.12141
hsa-miR-2114-5p	-1.52781	-0.611467	0.529849	0.999762	7.39594	1.81679	2.30131	1.68974	4.44325	1.45147
hsa-miR-6838-3p	1.19335	0.255017	0.797926	0.999762	3.29819	8.30532	0.557894	8.19838	1.14083	5.1748
hsa-miR-3174	2.0058	1.00418	0.408368	0.999762	1.56581	0.0648853	2.23158	1.00133	3.30241	3.4709
hsa-miR-1245a	-1.14049	-0.189648	0.835105	0.999762	3.59802	8.62975	2.23158	7.7603	1.62119	3.28158
hsa-miR-130a-3p	1.00407	0.0058548	0.993294	0.999762	173.505	53.4655	296.172	156.27	178.27	190.71
hsa-miR-371b-3p	1.93168	0.949855	0.207644	0.999762	5.13051	10.3817	1.46447	11.5153	11.7686	9.5292
hsa-miR-371a-3p	-1.14231	-0.191956	0.881023	0.999762	0.0999451	4.08778	2.16184	2.81624	2.52184	0.189322
hsa-miR-33b-3p	-1.12937	-0.175517	0.8243	0.999762	13.4593	9.34349	43.7947	21.7163	13.2097	23.9808
hsa-miR-512-3p	2.68844	1.42677	0.157955	0.999762	3.69797	0.324427	2.78947	12.0159	4.08299	2.33497
hsa-miR-520f-3p	1.19676	0.259139	0.784126	0.999762	4.19769	1.10305	8.85657	4.94406	2.64193	9.33988
hsa-miR-12115	-2.12517	-1.08758	0.178682	0.999762	8.4287	17.0648	4.04473	7.82288	4.9236	1.13593
hsa-miR-3681-5p	1.02882	0.0409975	0.969626	0.999762	2.49863	0.324427	6.41578	4.00531	2.76202	2.71361
hsa-miR-1296-3p	-1.41979	-0.505676	0.588737	0.999762	8.4287	8.56486	0.20921	3.25432	4.20307	4.66994
hsa-miR-203b-5p	1.73039	0.791099	0.305765	0.999762	4.63079	2.59541	4.67236	7.32221	4.98364	8.45638
hsa-miR-140-5p	1.06227	0.0871534	0.916552	0.999762	444.622	697.842	1052.68	923.788	575.161	832.701
hsa-miR-4280	1.01921	0.0274563	0.973503	0.999762	27.285	7.78624	51.1868	59.3287	12.6092	15.9661
hsa-miR-4255	-1.28208	-0.358489	0.66532	0.999762	5.39703	11.3549	3.34736	5.00664	9.00659	1.64079
hsa-miR-101-5p	3.24557	1.69847	0.125479	0.999762	0.033315	3.89312	1.11579	10.8894	2.34171	3.09226
hsa-miR-5000-5p	1.48523	0.570689	0.599063	0.999762	0.166575	2.85495	4.7421	5.38214	3.36246	2.71361
hsa-miR-3168	-3.88425	-1.95764	0.1681	0.999762	3.53139	0	2.0921	1.18908	0.120088	0.126215
hsa-miR-148b-5p	-1.38852	-0.473545	0.557211	0.999762	8.92843	29.0037	3.69605	11.8908	12.0688	5.99519
hsa-miR-5584-3p	-1.11611	-0.158485	0.883105	0.999762	1.36592	4.67174	1.95263	2.19041	2.16158	2.71361
hsa-miR-4715-5p	2.87818	1.52516	0.156847	0.999762	2.26542	2.01144	25.8723	78.792	1.02075	6.9418
hsa-miR-4259	1.8303	0.87208	0.331493	0.999762	2.76515	7.33204	23.9197	52.2568	3.90285	6.0583
hsa-miR-3163	1.25329	0.32572	0.809936	0.999762	1.56581	0.0648853	1.46447	1.18908	2.58189	0.126215
hsa-miR-142-5p	-1.49801	-0.58305	0.605002	0.999762	4.19769	3.30915	6.13683	2.12782	6.96509	0
hsa-miR-369-3p	2.04099	1.02927	0.222926	0.999762	22.1878	11.6794	66.3894	64.5231	65.1476	74.8452
hsa-miR-5692b	2.1856	1.12803	0.414955	0.999762	1.53249	0	0.278947	2.44074	1.26092	0.378644
hsa-miR-300	1.33101	0.412524	0.556338	0.999762	205.187	42.9541	363.259	221.669	306.224	285.876
hsa-miR-4666a-3p	1.11186	0.152973	0.834692	0.999762	91.8162	39.3854	232.99	90.8706	102.735	211.283
hsa-miR-875-5p	4.16411	2.05801	0.116832	0.999762	0.19989	0.194656	0.41842	1.43941	1.56114	0.315536
hsa-miR-3976	-1.48208	-0.567627	0.677085	0.999762	2.76515	0.194656	2.23158	0	3.18233	0.315536
hsa-miR-10397-3p	1.35498	0.438267	0.729695	0.999762	2.432	0.0648853	0.767104	0.750996	1.80132	1.95633
hsa-miR-3651	2.06279	1.04459	0.154257	0.999762	18.1567	10.3168	14.0868	32.2303	26.1191	30.1022
hsa-miR-7705	1.64952	0.722044	0.362015	0.999762	12.4265	3.24427	5.64868	19.7762	4.62338	10.9176
hsa-miR-1295b-3p	1.00567	0.00815728	0.994533	0.999762	2.59857	2.98472	0.836841	4.88148	0.900659	0.69418
hsa-miR-135a-3p	1.56366	0.644928	0.420481	0.999762	14.7919	48.08	6.20657	58.5777	22.1562	27.2623
hsa-miR-410-3p	1.13342	0.180681	0.797085	0.999762	76.3247	77.2784	213.813	77.3526	141.403	197.589
hsa-miR-5011-5p	2.60545	1.38153	0.197601	0.999762	1.3326	0.129771	6.55525	3.94273	6.30461	10.602
hsa-miR-3074-3p	2.14015	1.09771	0.405581	0.999762	0.033315	2.72518	1.74342	7.07188	2.28167	0.252429
hsa-miR-8076	-3.09627	-1.63053	0.248868	0.999762	1.16603	0.0648853	5.02104	1.43941	0.180132	0.378644
hsa-miR-656-3p	2.04343	1.03099	0.189238	0.999762	7.89566	7.5267	17.2947	40.1157	16.7522	9.90784
hsa-miR-6074	1.57203	0.652627	0.441498	0.999762	0.732931	7.46181	4.46315	9.19971	4.98364	5.61655
hsa-miR-34c-3p	2.33526	1.22358	0.132651	0.999762	31.8492	17	74.4788	31.9173	99.9731	156.064
hsa-miR-2115-3p	1.49608	0.581192	0.466505	0.999762	5.13051	6.74807	4.39341	3.62982	12.309	8.39327
hsa-miR-3617-3p	-1.51917	-0.603285	0.585108	0.999762	7.19605	0.129771	3.90526	2.44074	1.56114	3.40779
hsa-miR-5094	-1.23761	-0.307558	0.705816	0.999762	6.89621	4.73663	5.64868	5.50731	3.48255	5.1748
hsa-miR-217-3p	1.5949	0.673468	0.362406	0.999762	28.451	26.7328	12.2039	39.1144	44.4325	24.107
hsa-miR-154-3p	1.16635	0.221995	0.789196	0.999762	27.6848	14.7939	81.9407	38.1757	60.0439	46.8256
hsa-miR-136-3p	1.01981	0.0283	0.96946	0.999762	7.82903	8.04578	14.5052	11.4527	6.30461	13.1263
hsa-miR-2681-3p	3.75697	1.90957	0.156208	0.999762	0.366465	0	1.18552	1.94007	1.02075	2.83983
hsa-miR-96-3p	-1.45068	-0.536727	0.638838	0.999762	2.13216	6.29388	2.02237	3.6924	3.36246	0.126215
hsa-miR-382-3p	1.19543	0.257531	0.817466	0.999762	2.19879	0	16.2487	14.5818	4.80351	2.65051
hsa-miR-5586-5p	-1.38165	-0.466396	0.515828	0.999762	23.9868	11.6145	11.8552	4.63114	13.8101	15.9661
hsa-miR-7151-5p	-1.92731	-0.94659	0.328045	0.999762	6.09665	4.15266	5.29999	5.75764	1.80132	0.504858
hsa-miR-188-5p	1.01711	0.0244788	0.976579	0.999762	4.06443	5.12594	8.36841	2.5659	5.94435	9.27677
hsa-miR-4800-3p	-1.88787	-0.916763	0.256955	0.999762	5.96339	10.4465	1.95263	3.12915	4.50329	2.08254
hsa-miR-362-5p	1.17784	0.236146	0.750779	0.999762	11.1939	3.63358	11.8552	6.57122	10.3276	14.5778
hsa-miR-501-5p	-2.81511	-1.49319	0.123441	0.999762	6.62969	8.62975	1.67368	2.19041	0.540395	3.28158
hsa-miR-5188	1.13632	0.184368	0.852982	0.999762	2.79846	2.33587	1.95263	3.50465	2.10154	2.71361
hsa-miR-487b-3p	1.39952	0.484928	0.560166	0.999762	313.894	318.327	799.113	802.064	524.063	676.889
hsa-miR-1285-5p	-1.27791	-0.353791	0.752628	0.999762	3.19824	4.54197	1.11579	0.125166	1.44105	5.36412
hsa-miR-3675-3p	3.65057	1.86812	0.188287	0.999762	0.0999451	0	0.836841	1.37683	0.120088	1.89322
hsa-miR-3200-5p	1.45685	0.542853	0.549766	0.999762	2.46531	4.67174	3.76578	2.00266	7.9258	5.86898
hsa-miR-4686	2.44309	1.28871	0.215294	0.999762	5.19714	0.0648853	2.0921	6.32089	4.02294	7.7622
hsa-miR-1298-3p	-1.15126	-0.203215	0.875806	0.999762	3.29819	1.68702	0.20921	0.250332	0.180132	4.10197
hsa-miR-141-5p	3.06363	1.61524	0.188017	0.999762	0.799561	0.0648853	2.71973	1.75232	5.34391	3.84954
hsa-miR-425-5p	1.33563	0.417517	0.572994	0.999762	250.895	87.9845	772.544	381.444	516.558	586.393
hsa-miR-4712-3p	-1.73541	-0.795279	0.351032	0.999762	1026.9	882.895	397.011	228.929	627.999	472.358
hsa-miR-1272	-1.27298	-0.348213	0.688298	0.999762	4.73073	9.99234	2.99868	3.06657	7.98584	2.83983
hsa-miR-1322	1.67636	0.74533	0.603752	0.999762	1.46586	0.259541	0.41842	0	1.32097	2.33497
hsa-miR-501-3p	1.16951	0.225903	0.802954	0.999762	2.26542	2.85495	5.29999	4.38081	3.36246	4.22819
hsa-miR-586	-3.4715	-1.79556	0.142487	0.999762	1.69907	4.8664	1.325	0.187749	1.74127	0.315536
hsa-miR-532-5p	1.25614	0.328992	0.637829	0.999762	172.705	115.171	415.77	357.912	203.909	321.973
hsa-miR-4787-3p	1.29669	0.374837	0.73973	0.999762	3.46476	0.0648853	4.1842	0.938746	2.64193	6.43694
hsa-miR-3146	-1.49461	-0.57977	0.628583	0.999762	2.49863	3.43892	1.95263	3.94273	1.20088	0.126215
hsa-miR-4728-3p	-3.30959	-1.72665	0.195845	0.999762	6.92953	0	2.23158	0.813579	0.180132	1.767
hsa-miR-3688-3p	-2.18634	-1.12852	0.18076	0.999762	6.16328	14.3397	2.30131	2.06524	5.94435	2.39808
hsa-miR-1843	1.02676	0.0381016	0.963231	0.999762	4.29764	15.8969	5.92762	2.19041	6.4247	18.1749
hsa-miR-6514-5p	-2.22408	-1.15321	0.288061	0.999762	28.2845	4.4122	0.348684	10.6391	3.84281	0.378644
hsa-miR-1246	2.26449	1.17919	0.189423	0.999762	8.56196	18.4274	5.29999	8.32354	60.8245	3.97576
hsa-miR-183-5p	-1.67316	-0.742576	0.356106	0.999762	5.0972	17.3244	7.11315	3.06657	4.32316	10.2234
hsa-miR-652-3p	1.39235	0.477522	0.496	0.999762	229.74	113.355	423.79	189.94	331.923	545.878
hsa-miR-889-5p	-1.24752	-0.319058	0.658255	0.999762	27.1851	11.6794	28.8013	8.57388	14.9509	30.7332
hsa-miR-135a-5p	1.30011	0.378629	0.736916	0.999762	3.29819	92.7211	8.43814	125.729	5.64413	4.41751
hsa-miR-6871-5p	-1.26946	-0.344217	0.687882	0.999762	9.32821	21.0228	2.30131	7.44738	6.845	11.4224
hsa-miR-3675-5p	1.4911	0.576381	0.691072	0.999762	0	0.0648853	1.67368	0.500664	1.68123	0.378644
hsa-miR-6890-5p	1.0082	0.0117846	0.992965	0.999762	3.3315	0.0648853	1.11579	1.68974	2.82206	0.0631073
hsa-miR-5579-5p	-1.57393	-0.654373	0.578754	0.999762	1.79901	4.60686	1.53421	1.25166	3.06224	0.69418
hsa-miR-218-2-3p	-1.64064	-0.714258	0.341037	0.999762	66.7633	151.377	28.9407	52.1943	53.1389	45.2479
hsa-miR-758-5p	-1.11602	-0.158367	0.876131	0.999762	3.66465	6.09922	0.557894	4.94406	3.36246	0.946609
hsa-miR-379-3p	1.2223	0.289599	0.723241	0.999762	438.193	363.617	762.223	592.849	588.25	730.467
hsa-miR-380-3p	1.45558	0.541596	0.496658	0.999762	4.33095	4.99617	5.43947	3.6924	13.1496	4.60683
hsa-miR-12129	-1.15319	-0.205635	0.854897	0.999762	2.26542	3.69846	2.30131	3.44207	0.120088	3.59712
hsa-miR-3668	1.31299	0.392859	0.759187	0.999762	2.29874	0.129771	2.44079	2.69107	0.0600439	3.66022
hsa-miR-7852-3p	-1.26987	-0.344685	0.741923	0.999762	5.69687	1.42748	2.44079	1.81491	3.90285	1.89322
hsa-miR-6834-3p	-2.19088	-1.13151	0.329358	0.999762	4.39758	4.99617	3.13815	0.125166	0.600439	4.98548
hsa-miR-654-3p	1.48458	0.570052	0.388929	0.999762	309.93	213.148	553.361	526.574	503.648	567.713
hsa-miR-455-5p	1.50773	0.592381	0.479925	0.999762	30.7831	14.9236	52.1631	44.6217	40.1093	62.7917
hsa-miR-299-3p	1.3808	0.465508	0.569525	0.999762	5.79682	3.04961	18.8987	12.6418	13.0295	12.5583
hsa-miR-511-3p	1.39597	0.481266	0.733824	0.999762	1.59912	0.129771	0.906578	0.187749	0.120088	3.40779
hsa-miR-4781-3p	-1.10695	-0.14659	0.853008	0.999762	19.4227	30.1068	4.67236	31.4167	10.8679	6.68937
hsa-miR-4307	-1.2122	-0.277633	0.700433	0.999762	88.2515	75.267	108.999	29.0385	126.392	69.3549
hsa-miR-12132	-2.62738	-1.39362	0.221071	0.999762	3.73128	8.11067	0.697367	3.19173	0.180132	1.38836
hsa-miR-126-5p	1.41324	0.49901	0.611118	0.999762	1.16603	6.68319	1.53421	2.87882	5.70417	4.60683
hsa-miR-4272	-1.27333	-0.348611	0.773767	0.999762	5.63024	0.129771	1.53421	3.75498	1.62119	0.378644
hsa-miR-892c-5p	1.20583	0.270029	0.850552	0.999762	1.56581	0	2.23158	0.062583	1.68123	2.83983
hsa-miR-506-5p	1.30846	0.387866	0.805945	0.999762	1.39923	0	0.348684	0	0.30022	2.01943
hsa-miR-664a-3p	1.56687	0.647889	0.412667	0.999762	7.19605	9.08395	30.8934	17.8362	24.1376	31.8061
hsa-miR-3938	-2.96564	-1.56834	0.120118	0.999762	2.83178	13.8206	2.71973	1.18908	0.840615	4.48062
hsa-miR-4778-5p	-1.98258	-0.987377	0.41395	0.999762	1.26597	7.59158	0.348684	2.5659	0.480351	1.57768
hsa-miR-25-3p	1.35773	0.441195	0.621142	0.999762	15189.7	8205.4	20178.2	14718.7	13694.7	30747.3
hsa-miR-4699-3p	-2.04899	-1.03491	0.395676	0.999762	0.26652	6.22899	0.767104	1.43941	1.38101	0.69418
hsa-miR-5002-5p	-1.54208	-0.624878	0.450104	0.999762	33.4816	20.374	3.97499	10.3888	5.94435	21.204
hsa-miR-3613-3p	-1.37249	-0.456795	0.651246	0.999762	6.46312	5.45037	0.488157	1.87749	2.64193	4.54372
hsa-miR-1323	-1.06125	-0.08577	0.929982	0.999762	12.06	0.324427	5.71841	3.06657	12.249	1.767
hsa-miR-8063	-2.40549	-1.26633	0.338774	0.999762	0.166575	4.21755	0.627631	1.37683	0.240176	0.441751
hsa-miR-4698	-2.6996	-1.43274	0.139649	0.999762	2.33205	3.89312	17.5737	5.31956	2.64193	0.820395
hsa-miR-6715a-3p	-1.14738	-0.198341	0.795127	0.999762	12.1267	20.6335	28.4526	25.3461	20.475	7.44666
hsa-miR-330-3p	1.65974	0.73096	0.282757	0.999762	55.1697	115.626	33.6131	111.711	134.498	93.0201
hsa-miR-3973	-1.94848	-0.962347	0.437041	0.999762	0.33315	11.5496	1.11579	0.062583	4.50329	2.08254
hsa-miR-520g-3p	-1.94388	-0.958939	0.291282	0.999762	6.12997	4.34732	13.25	8.32354	3.48255	0.378644
hsa-miR-4762-5p	1.34858	0.431439	0.580596	0.999762	84.0538	37.893	61.1591	39.1144	44.2524	163.637
hsa-miR-105-5p	-2.01146	-1.00824	0.235679	0.999762	90.9833	72.7364	11.5066	41.9306	29.4215	15.7768
hsa-miR-4709-5p	-1.47914	-0.564757	0.669066	0.999762	0.166575	3.63358	1.53421	0.750996	0.240176	2.5874
hsa-miR-4714-3p	1.05873	0.082328	0.934088	0.999762	2.29874	9.60303	0.836841	5.25697	4.98364	3.21847
hsa-miR-335-5p	1.34593	0.428605	0.715027	0.999762	1.53249	2.98472	1.53421	1.75232	6.12448	0.252429
hsa-miR-5697	-1.17312	-0.23035	0.826726	0.999762	40.0114	3.50381	3.69605	36.7988	2.4618	1.00972
hsa-miR-224-5p	1.09857	0.135623	0.870287	0.999762	5.06388	4.80151	31.9394	18.0865	13.63	14.136
hsa-miR-95-5p	2.34297	1.22834	0.30845	0.999762	2.86509	0	3.34736	4.38081	1.32097	8.89813
hsa-miR-6826-5p	-1.30278	-0.381591	0.773061	0.999762	2.86509	3.1145	0.278947	4.4434	0.30022	0.0631073
hsa-miR-16-2-3p	-1.984	-0.988409	0.311711	0.999762	1.26597	10.7061	3.97499	3.6924	2.28167	2.01943
hsa-miR-4705	-1.08149	-0.113018	0.93263	0.999762	0.13326	5.70991	0.278947	3.37948	0.180132	2.08254
hsa-miR-4719	-4.65843	-2.21984	0.129125	0.999762	0.033315	3.1145	3.06842	1.18908	0.0600439	0.0631073
hsa-miR-5003-5p	3.53435	1.82144	0.220437	0.999762	0.033315	0.0648853	0.20921	0.938746	0.0600439	0.0631073
hsa-miR-4457	-1.08836	-0.122155	0.920189	0.999762	3.69797	1.55725	0.41842	4.0679	0.30022	0.883502
hsa-miR-125b-2-3p	-1.68307	-0.751099	0.464621	0.999762	5.5303	8.11067	1.46447	4.63114	0.240176	4.10197
hsa-miR-1228-3p	-1.10966	-0.150118	0.848555	0.999762	5.16383	2.40076	9.69341	4.75631	5.76421	4.98548
hsa-miR-216b-3p	-1.41589	-0.501714	0.746816	0.999762	1.93227	0	0.0697367	1.00133	0.180132	0.252429
hsa-miR-128-3p	-1.90444	-0.929368	0.128498	0.999762	363.167	280.369	140.171	160.776	109.4	141.423
hsa-miR-1226-3p	1.85934	0.894791	0.244294	0.999762	4.53084	4.93128	23.1526	18.9627	14.1704	27.3886
hsa-miR-4733-3p	1.03908	0.0553051	0.954222	0.999762	6.39649	2.01144	3.97499	9.51262	1.44105	1.95633
hsa-miR-500b-3p	2.26643	1.18042	0.221191	0.999762	2.86509	0.519083	4.04473	8.01063	4.32316	4.54372
hsa-miR-6865-3p	-1.19209	-0.253498	0.806442	0.999762	3.26487	3.89312	3.27763	0.938746	5.58408	2.20875
hsa-miR-3620-3p	-1.5689	-0.649753	0.401263	0.999762	23.054	5.06106	19.7355	9.76295	8.46619	12.3059
hsa-miR-181d-3p	-2.91281	-1.54241	0.175189	0.999762	6.99616	6.94273	0.278947	4.13048	0.30022	0.441751
hsa-miR-1306-5p	1.06529	0.0912402	0.9173	0.999762	15.225	2.14122	14.0868	2.5659	12.7894	18.1749
hsa-miR-3622a-3p	-1.02753	-0.0391798	0.974528	0.999762	3.0983	0.129771	1.18552	1.00133	1.08079	2.27186
hsa-miR-6765-3p	1.00046	0.000660709	0.999328	0.999762	30.25	31.9236	49.5828	31.9799	31.6431	48.0246
hsa-miR-3186-3p	2.70545	1.43587	0.150866	0.999762	0.26652	2.01144	4.25394	6.57122	2.52184	8.45638
hsa-miR-11401	1.25373	0.326221	0.712795	0.999762	1.19934	9.47326	10.4605	5.06923	16.8723	4.48062
hsa-miR-6767-3p	-2.02887	-1.02067	0.238668	0.999762	9.32821	6.09922	5.71841	0.688413	4.56334	5.1748
hsa-miR-4999-3p	1.6118	0.688673	0.565565	0.999762	2.06553	0.129771	2.16184	3.3169	1.80132	1.95633
hsa-miR-483-3p	-1.71165	-0.775386	0.332243	0.999762	38.5455	21.8664	20.6421	10.3888	4.80351	32.1847
hsa-miR-4639-3p	2.8753	1.52371	0.259389	0.999762	0.299835	0.454197	0.627631	2.87882	0.30022	0.757287
hsa-miR-6890-3p	-1.40781	-0.493452	0.537698	0.999762	10.0278	4.80151	13.5289	3.81757	5.40395	10.9176
hsa-miR-6760-3p	1.3254	0.406428	0.600846	0.999762	8.39539	11.5496	5.78815	8.76162	13.8101	11.5486
hsa-miR-1208	-1.55887	-0.640502	0.628733	0.999762	1.73238	0.194656	2.65	2.31557	0.360263	0.252429
hsa-miR-3614-5p	1.0947	0.130533	0.874185	0.999762	3.06498	5.38548	6.27631	8.26096	4.26312	3.4709
hsa-miR-6500-3p	1.42328	0.509216	0.570372	0.999762	7.02947	1.36259	3.13815	5.63247	4.08299	6.87869
hsa-miR-589-3p	2.02625	1.01881	0.380774	0.999762	0.033315	2.85495	4.39341	5.63247	2.88211	6.18451
hsa-miR-1324	-1.98129	-0.986439	0.432943	0.999762	0.433095	7.33204	0.697367	0.312915	2.10154	1.83011
hsa-miR-4494	-1.69262	-0.759256	0.338024	0.999762	5.73019	7.78624	6.0671	4.88148	1.56114	5.11169
hsa-miR-499b-5p	-1.73878	-0.798079	0.553235	0.999762	2.46531	2.72518	0.139473	2.81624	0.120088	0.126215
hsa-miR-6501-3p	1.21536	0.281383	0.833664	0.999762	1.83233	0.324427	4.11447	7.13447	0.420307	0.0631073
hsa-miR-6847-5p	-1.05132	-0.0722056	0.955294	0.999762	0.033315	3.30915	2.71973	2.25299	1.14083	2.33497
hsa-miR-4257	-1.67767	-0.746462	0.578248	0.999762	0.033315	5.58014	1.60394	3.12915	0.960702	0.189322
hsa-miR-759	1.291	0.368491	0.64638	0.999762	2.89841	6.16411	5.36973	8.32354	2.64193	7.57287
hsa-miR-1288-5p	-1.32667	-0.407811	0.611687	0.999762	64.931	44.1869	49.7223	47.1876	34.9456	37.8644
hsa-miR-1245b-3p	1.08424	0.116681	0.886107	0.999762	1.43255	9.47326	8.50788	7.25963	7.62558	6.0583
hsa-miR-545-3p	1.14092	0.190195	0.901322	0.999762	0.0666301	0.129771	2.16184	0	0.900659	1.767
hsa-miR-3065-3p	3.2935	1.71962	0.151824	0.999762	0.166575	2.53053	0.488157	1.87749	3.72272	4.79615
hsa-miR-922	-1.16996	-0.226463	0.778854	0.999762	12.2932	11.874	7.53157	6.6338	4.02294	16.471
hsa-miR-214-3p	-2.38749	-1.2555	0.14501	0.999762	565.456	2089.11	535.09	415.989	544.658	375.299
hsa-miR-4691-3p	1.36224	0.445981	0.573791	0.999762	13.1928	11.2252	5.16052	19.9014	11.9487	8.58259
hsa-miR-4690-3p	1.7899	0.83988	0.292259	0.999762	8.4287	2.79007	5.29999	14.5818	6.30461	8.89813
hsa-miR-5690	1.44444	0.530509	0.532554	0.999762	2.69852	3.17938	9.83288	5.75764	9.78716	7.00491
hsa-miR-6736-3p	-1.35971	-0.443297	0.686548	0.999762	3.66465	0.454197	7.11315	1.25166	3.9629	3.02915
hsa-miR-1207-3p	1.06785	0.0947147	0.917315	0.999762	7.29599	3.17938	3.27763	3.19173	1.98145	9.59231
hsa-miR-4768-3p	-1.9107	-0.934101	0.240227	0.999762	8.56196	5.12594	4.7421	2.69107	5.64413	1.32525
hsa-miR-4433a-3p	-1.14489	-0.195206	0.798489	0.999762	36.48	8.8244	25.6631	28.4127	15.7915	17.8594
hsa-miR-4742-5p	-1.05809	-0.0814606	0.948315	0.999762	1.96559	0.194656	2.92894	0.125166	0.960702	3.72333
hsa-miR-4269	1.34483	0.427427	0.75193	0.999762	1.16603	0.194656	0.0697367	0.438081	1.32097	0.252429
hsa-miR-4514	-1.69961	-0.765204	0.489806	0.999762	3.66465	1.49236	3.83552	1.62716	0.840615	2.83983
hsa-miR-1972	-1.32548	-0.406517	0.676447	0.999762	1.69907	11.5496	1.39473	4.19306	3.66268	3.15536
hsa-miR-4650-5p	-1.18585	-0.245918	0.817929	0.999762	1.36592	8.43509	5.16052	8.26096	4.20307	0.126215
hsa-miR-3937	-1.7753	-0.82806	0.386064	0.999762	3.93117	9.7328	0.976314	2.50332	2.76202	2.96604
hsa-miR-3155a	1.03516	0.0498586	0.941999	0.999762	264.821	138.465	505.591	212.282	320.394	408.115
hsa-miR-211-3p	3.00496	1.58735	0.199701	0.999762	1.66575	0.454197	0.278947	1.81491	0.420307	5.1748
hsa-miR-4270	-1.39945	-0.484864	0.612964	0.999762	8.96174	5.90456	1.46447	8.94937	0.720527	2.01943
hsa-miR-3918	1.11453	0.156437	0.88133	0.999762	4.63079	6.09922	0.278947	1.31424	5.04369	5.93208
hsa-miR-6798-5p	2.36198	1.24	0.35249	0.999762	0.766246	0.0648853	0.20921	0.876162	1.5011	0.252429
hsa-miR-6823-5p	-1.01811	-0.0258866	0.972207	0.999762	14.7586	22.1259	3.62631	16.209	12.309	11.2962
hsa-miR-9900	-1.26533	-0.339517	0.635349	0.999762	12.9595	10.3168	6.34604	13.0173	5.28386	5.1748
hsa-miR-125a-3p	1.31888	0.399313	0.609117	0.999762	12.1267	5.77479	17.3644	12.2037	10.3276	23.9808
hsa-miR-764	-1.30832	-0.38771	0.716693	0.999762	3.7646	4.8664	0.278947	2.5659	1.86136	2.39808
hsa-miR-3934-5p	-1.04798	-0.0676051	0.93019	0.999762	4.06443	7.5267	7.25262	5.75764	6.24457	5.67966
hsa-miR-545-5p	-1.99532	-0.996617	0.450819	0.999762	4.93062	5.06106	0.627631	5.19439	0.120088	0
hsa-miR-936	-1.15048	-0.202234	0.807376	0.999762	9.66136	29.1335	15.4816	34.2955	5.40395	7.44666
hsa-miR-199a-3p	1.22366	0.291199	0.740203	0.999762	9613.29	13322.2	18082.7	24446.9	10237	15508.1
hsa-miR-16-1-3p	1.25379	0.326301	0.762479	0.999762	1.69907	8.11067	1.11579	11.2649	2.04149	0.378644
hsa-miR-4704-3p	-1.06231	-0.0872	0.938364	0.999762	3.3315	3.24427	0.348684	2.87882	1.98145	1.7039
hsa-miR-455-3p	1.43403	0.52008	0.450255	0.999762	198.091	191.606	518.841	450.786	277.883	574.087
hsa-miR-1910-5p	-1.92116	-0.941976	0.372377	0.999762	9.39484	0.324427	2.16184	2.44074	3.0022	0.757287
hsa-miR-622	1.14341	0.193349	0.865546	0.999762	3.0983	2.14122	1.18552	5.44472	1.68123	0.252429
hsa-miR-5190	-2.87667	-1.5244	0.284021	0.999762	1.79901	0.0648853	0.627631	0.062583	0.30022	0.504858
hsa-miR-148a-3p	1.34349	0.425982	0.522023	0.999762	120.6	66.9617	298.613	226.238	193.101	233.749
hsa-miR-5693	-1.40843	-0.494088	0.593596	0.999762	6.06334	12.0038	1.81316	0.62583	6.66487	6.81559
hsa-miR-194-3p	-1.85153	-0.888722	0.443624	0.999762	1.23266	3.63358	2.30131	2.31557	1.20088	0.315536
hsa-miR-6733-3p	1.59394	0.672597	0.418321	0.999762	3.0983	4.08778	5.02104	12.8295	1.80132	4.79615
hsa-miR-4302	1.5135	0.597886	0.538512	0.999762	1.26597	8.11067	1.04605	4.19306	3.9629	7.57287
hsa-miR-935	-2.88541	-1.52878	0.188626	0.999762	3.86454	2.27099	1.95263	0.938746	0.240176	1.64079
hsa-miR-584-3p	1.86621	0.900114	0.360319	0.999762	3.43145	0.778624	5.02104	6.75897	2.16158	8.33016
hsa-miR-4277	1.43909	0.52516	0.592867	0.999762	6.03002	0.583968	2.58026	2.75365	3.84281	6.75248
hsa-miR-4328	-1.09329	-0.128674	0.926244	0.999762	3.16493	0	1.46447	0.062583	0.840615	3.34469
hsa-miR-1-5p	2.12747	1.08914	0.403426	0.999762	2.29874	0	1.74342	4.63114	0.30022	3.72333
hsa-miR-103b	1.37171	0.455978	0.652786	0.999762	5.49698	3.1145	0.41842	2.37816	2.52184	7.57287
hsa-miR-1279	-1.29361	-0.371407	0.774812	0.999762	1.73238	3.82823	0.139473	0.062583	1.56114	2.77672
hsa-miR-6729-3p	-2.5131	-1.32947	0.182783	0.999762	9.96119	2.98472	0.697367	2.19041	1.68123	1.57768
hsa-miR-5196-3p	-2.23262	-1.15874	0.186933	0.999762	4.46421	10.9007	3.06842	3.37948	2.76202	2.08254
hsa-miR-4793-5p	1.59012	0.66914	0.373128	0.999762	13.0595	7.39693	15.4816	6.44605	13.9302	36.7915
hsa-miR-6785-3p	1.2492	0.321003	0.777969	0.999762	1.93227	0.908395	2.51052	3.50465	1.74127	1.45147
hsa-miR-8060	-1.44889	-0.534947	0.652171	0.999762	4.93062	5.25571	0.0697367	4.88148	0.180132	2.01943
hsa-miR-490-5p	-1.48894	-0.574283	0.512202	0.999762	1775.72	751.956	2022.16	407.603	765.86	1882.3
hsa-miR-10226	2.61366	1.38607	0.233703	0.999762	1.49918	0.389312	1.67368	5.06923	2.88211	1.45147
hsa-miR-4528	1.81889	0.863059	0.567305	0.999762	0	0.0648853	2.0921	0.876162	1.56114	1.45147
hsa-miR-4317	1.03171	0.0450354	0.962398	0.999762	7.59583	3.43892	1.46447	3.00399	5.22382	4.79615
hsa-miR-4289	1.29548	0.373482	0.595561	0.999762	22.0546	6.6183	10.8789	16.3968	20.2348	14.8302
hsa-miR-4729	-1.04254	-0.0600989	0.956001	0.999762	5.3304	0.0648853	2.37105	2.62849	2.4618	2.39808
hsa-miR-1250-3p	3.26519	1.70717	0.236449	0.999762	0.799561	0	0.20921	1.68974	1.5011	0.315536
hsa-miR-3691-3p	1.32863	0.409938	0.609884	0.999762	4.46421	28.9389	8.64736	30.0399	14.5306	11.2331
hsa-miR-323b-3p	1.5606	0.642099	0.353431	0.999762	83.3875	39.4503	119.668	73.4725	127.773	177.205
hsa-miR-6777-3p	-1.21464	-0.280527	0.814954	0.999762	2.49863	0.259541	2.30131	1.81491	1.86136	0.504858
hsa-miR-181a-2-3p	1.16794	0.22396	0.803897	0.999762	472.807	304.637	1152.05	242.634	514.396	1496.46
hsa-miR-324-3p	1.24124	0.311784	0.693235	0.999762	17.557	34.519	39.8894	15.458	74.5745	24.0439
hsa-miR-9902	-3.1904	-1.67374	0.158824	0.999762	8.22881	3.24427	0.0697367	1.31424	1.98145	0.315536
hsa-miR-488-5p	-2.99904	-1.5845	0.589944	0.999762	0.033315	0	0	0	0	0
hsa-miR-4530	-1.01959	-0.0279937	0.978807	0.999762	4.09775	1.29771	4.39341	2.37816	2.40176	4.85926
hsa-miR-338-3p	1.1275	0.173125	0.882596	0.999762	0.299835	2.33587	1.74342	2.31557	0.960702	1.57768
hsa-miR-6849-3p	1.84092	0.880427	0.259841	0.999762	12.5265	9.60303	9.41446	5.88281	45.153	7.06802
hsa-miR-4738-5p	-2.68444	-1.42462	0.261494	0.999762	5.69687	8.49998	0.0697367	0.062583	4.98364	0.252429
hsa-miR-4267	-1.38026	-0.464944	0.703321	0.999762	1.23266	4.73663	0.20921	2.19041	1.32097	0.946609
hsa-miR-665	-1.08468	-0.117275	0.879431	0.999762	26.4188	10.5763	47.9091	25.5965	30.6824	21.9613
hsa-miR-4645-5p	-1.52886	-0.612454	0.686226	0.999762	0	0.259541	2.37105	0.187749	0.0600439	1.45147
hsa-miR-4712-5p	-1.06314	-0.0883296	0.908674	0.999762	6.99616	11.5496	10.7395	17.8362	3.30241	6.37384
hsa-miR-1825	-1.31663	-0.396854	0.588076	0.999762	16.6575	6.94273	4.95131	7.25963	9.60702	4.92237
hsa-miR-199a-5p	1.05267	0.0740585	0.93221	0.999762	801.726	294.579	1775.01	799.686	1046.39	1176.45
hsa-miR-6884-3p	-1.13475	-0.182378	0.893658	0.999762	0.233205	0.194656	1.81316	0.187749	0.180132	1.57768
hsa-miR-181a-3p	1.2749	0.350386	0.62163	0.999762	215.515	85.7784	379.368	394.711	196.884	276.157
hsa-miR-6872-3p	1.50168	0.586575	0.59466	0.999762	3.83123	3.04961	0.557894	1.56458	1.98145	7.69909
hsa-miR-4716-5p	2.05063	1.03606	0.184919	0.999762	1.69907	5.51525	13.8079	15.2077	14.3505	13.3787
hsa-miR-885-5p	-1.5835	-0.663121	0.654299	0.999762	1.06608	0.0648853	0	0.062583	0.600439	0.0631073
hsa-miR-186-3p	-1.11995	-0.163431	0.888309	0.999762	4.46421	0.908395	0.627631	2.06524	1.56114	1.83011
hsa-miR-1224-3p	-2.09715	-1.06843	0.312728	0.999762	10.2277	0.648853	10.6697	0.876162	9.00659	0.378644
hsa-miR-662	1.22327	0.290745	0.722807	0.999762	15.758	2.79007	15.9697	10.4514	15.7915	16.0293
hsa-miR-4301	2.81329	1.49226	0.130824	0.999762	3.53139	2.33587	0.906578	0.938746	9.36685	8.89813
hsa-miR-6840-3p	-2.06333	-1.04498	0.248578	0.999762	7.56251	4.99617	3.27763	1.94007	1.62119	4.16508
hsa-miR-1915-3p	-1.33033	-0.41178	0.603893	0.999762	6.79627	13.8206	4.1842	5.88281	7.80571	4.92237
hsa-miR-6793-3p	-1.41166	-0.497389	0.656598	0.999762	1.13271	7.78624	0.976314	4.38081	2.16158	0.441751
hsa-miR-4286	2.33517	1.22353	0.173188	0.999762	55.836	127.5	84.1025	14.9573	565.373	44.1751
hsa-miR-361-3p	-1.20201	-0.265453	0.776838	0.999762	3.53139	5.77479	2.30131	1.18908	2.34171	6.12141
hsa-miR-6840-5p	1.48656	0.57198	0.463665	0.999762	17.557	5.58014	8.99604	8.76162	21.0154	18.1749
hsa-miR-4707-5p	1.54924	0.631558	0.448923	0.999762	493.329	403.911	529.232	532.832	525.564	1151.58
hsa-miR-5587-3p	1.28344	0.360021	0.620376	0.999762	13.6258	9.14883	19.1079	8.19838	35.1857	10.3496
hsa-miR-6887-3p	1.24292	0.313728	0.671942	0.999762	25.9524	13.561	12.4829	8.69904	28.3407	27.7041
hsa-miR-6795-3p	-2.33778	-1.22514	0.204602	0.999762	20.5887	13.8855	3.48684	0.187749	7.08518	8.96123
hsa-miR-6801-3p	-2.01739	-1.01249	0.271214	0.999762	8.76185	12.7175	0.488157	2.37816	3.9629	4.54372
hsa-miR-331-3p	1.77658	0.8291	0.314675	0.999762	13.7924	9.40837	32.5671	52.3194	26.4794	20.1943
hsa-miR-3127-3p	1.05325	0.0748465	0.945908	0.999762	5.16383	0.324427	3.20789	3.6924	1.86136	3.66022
hsa-miR-4740-3p	1.07559	0.105135	0.910221	0.999762	15.2916	11.874	0.41842	8.69904	12.4891	8.51948
hsa-miR-4258	-1.17978	-0.238521	0.757528	0.999762	16.4576	8.56486	4.60262	4.63114	9.78716	10.7913
hsa-miR-7108-3p	-1.16866	-0.224851	0.786183	0.999762	8.49533	19.2061	7.25262	2.81624	12.4891	14.5778
hsa-miR-1471	-1.37162	-0.455883	0.536374	0.999762	21.788	38.0877	33.8223	16.4593	38.9685	12.8108
hsa-miR-10398-3p	-1.61664	-0.692999	0.36207	0.999762	43.6094	144.564	26.3605	58.9532	41.8506	31.8692
hsa-miR-1247-3p	-2.15404	-1.10704	0.39561	0.999762	1.3326	0.713739	2.58026	0.187749	0.240176	1.7039
hsa-miR-4783-3p	2.33857	1.22562	0.198528	0.999762	3.66465	1.16794	2.44079	9.82554	2.70198	4.66994
hsa-miR-1247-5p	-1.09329	-0.128683	0.883082	0.999762	12.2932	31.2098	3.62631	30.9786	7.32536	4.79615
hsa-miR-4667-3p	1.12328	0.167718	0.804651	0.999762	14.8585	13.1717	14.9934	8.82421	20.9553	18.5535
hsa-miR-6803-3p	1.64132	0.714855	0.3545	0.999762	5.63024	9.99234	6.48552	4.00531	9.8472	22.4031
hsa-miR-4655-3p	1.16669	0.222416	0.760035	0.999762	21.6548	17.6488	20.5723	27.8495	26.0591	16.0293
hsa-miR-6892-3p	1.67947	0.748004	0.494473	0.999762	3.73128	0.778624	0.976314	1.62716	3.36246	4.41751
hsa-miR-2276-5p	-1.21146	-0.276743	0.725137	0.999762	7.92898	4.8664	5.78815	4.4434	8.10593	2.83983
hsa-miR-345-3p	-2.02104	-1.0151	0.195862	0.999762	20.3555	3.43892	9.06578	3.06657	4.26312	8.96123
hsa-miR-4732-3p	-1.04007	-0.0566747	0.943821	0.999762	12.3266	10.7061	7.46183	4.13048	12.4291	12.8108
hsa-miR-125a-5p	-1.38786	-0.472859	0.592718	0.999762	20005.4	23821.3	15073	9077.36	15419	17943
hsa-miR-6752-3p	-1.08232	-0.114122	0.871249	0.999762	12.793	24.6564	9.62367	15.3328	7.50549	20.6361
hsa-miR-4308	-1.17367	-0.231024	0.773268	0.999762	7.62914	16.9351	9.69341	5.75764	12.5492	10.7913
hsa-miR-4292	-1.12199	-0.166058	0.814263	0.999762	141.056	85.9731	132.012	33.2316	139.242	147.545
hsa-miR-339-5p	1.11198	0.153127	0.835606	0.999762	18.5232	13.9503	20.1539	22.0918	19.094	17.4176
hsa-miR-146b-3p	-1.06099	-0.0854115	0.897934	0.999762	237.07	97.8471	244.636	81.2328	231.469	233.56
hsa-miR-5088-3p	-1.36862	-0.452717	0.645885	0.999762	5.66356	2.79007	2.37105	2.44074	1.80132	3.78644
hsa-miR-4780	1.57077	0.651473	0.500998	0.999762	4.56416	0.648853	4.04473	6.2583	5.64413	2.71361
hsa-miR-6780b-3p	1.23935	0.309584	0.72066	0.999762	22.6875	5.51525	43.3065	5.50731	30.9827	52.1266
hsa-miR-6832-3p	-1.1995	-0.262432	0.819571	0.999762	6.03002	2.01144	0.348684	3.88015	0.180132	2.96604
hsa-miR-6716-3p	-2.8242	-1.49784	0.151733	0.999762	10.4276	0.908395	8.1592	2.44074	0.420307	4.03887
hsa-miR-4671-5p	-1.31338	-0.393284	0.728747	0.999762	0.166575	7.26716	3.4171	1.50199	4.32316	2.39808
hsa-miR-615-3p	-1.73645	-0.796139	0.307888	0.999762	28.1845	26.603	6.34604	7.57255	11.9487	15.7137
hsa-miR-6886-5p	1.30746	0.386764	0.617469	0.999762	23.7869	14.3397	8.1592	15.0199	31.7632	13.8836
hsa-miR-4485-5p	-1.83966	-0.879442	0.257425	0.999762	31.9824	37.2442	8.08946	8.94937	15.6114	17.4807
hsa-miR-1203	-1.55739	-0.639133	0.44016	0.999762	4.63079	9.2786	3.20789	3.3169	3.66268	3.97576
hsa-miR-6784-5p	1.01539	0.0220341	0.977336	0.999762	11.1939	34.2594	46.1657	21.1531	50.3768	21.3934
hsa-miR-671-3p	1.41851	0.504372	0.517549	0.999762	4.89731	10.5763	17.0855	15.0825	13.0295	17.8594
hsa-miR-3678-5p	1.04478	0.0631974	0.969142	0.999762	2.06553	0.129771	0	2.19041	0	0.126215
hsa-miR-340-3p	-1.00364	-0.0052482	0.994137	0.999762	100.711	33.4159	200.075	93.6242	95.8301	143.506
hsa-miR-1973	2.95067	1.56104	0.224989	0.999762	0.299835	0.0648853	0.278947	1.12649	0.360263	0.567966
hsa-miR-132-5p	1.24314	0.313988	0.713881	0.999762	687.989	688.368	1874.11	968.16	1105.71	1966.8
hsa-miR-5009-3p	-1.57282	-0.653356	0.497868	0.999762	2.83178	3.63358	3.76578	1.12649	1.74127	3.59712
hsa-miR-6761-3p	-1.41013	-0.495831	0.664642	0.999762	2.23211	5.25571	1.11579	2.37816	0.180132	3.53401
hsa-miR-5193	1.05015	0.0705939	0.925139	0.999762	28.9841	15.9618	18.6197	11.8282	30.8025	24.2332
hsa-miR-660-3p	1.00371	0.00533911	0.99471	0.999762	10.0945	17.6488	12.5526	4.0679	12.4291	23.9177
hsa-miR-10401-3p	1.76217	0.817357	0.293693	0.999762	2.432	6.48853	5.16052	6.82155	9.66707	8.01463
hsa-miR-3183	1.83133	0.872895	0.376205	0.999762	7.82903	0.129771	4.1842	4.00531	8.40615	9.90784
hsa-miR-877-3p	1.5775	0.657636	0.372162	0.999762	7.02947	6.42365	6.97367	6.50864	7.44544	18.3011
hsa-miR-3140-5p	2.78201	1.47613	0.212742	0.999762	1.49918	0.129771	1.39473	1.18908	4.68342	2.65051
hsa-miR-4324	-1.22212	-0.28939	0.6857	0.999762	113.304	94.1486	65.2038	29.7269	80.5789	112.836
hsa-miR-544b	-2.60945	-1.38375	0.198094	0.999762	0.46641	13.6908	5.5092	2.37816	4.62338	0.504858
hsa-miR-6747-3p	-1.02066	-0.0295042	0.968037	0.999762	8.99506	11.9389	15.4118	8.51129	11.8286	15.0826
hsa-miR-1539	-2.79034	-1.48044	0.22721	0.999762	3.46476	3.958	0.278947	0.938746	1.62119	0.189322
hsa-miR-3193	1.74277	0.801379	0.473489	0.999762	2.76515	1.36259	0.627631	2.5659	3.0022	3.02915
hsa-miR-370-3p	1.21663	0.282895	0.723847	0.999762	214.582	28.29	283.271	35.9852	289.051	315.095
hsa-miR-3690	-1.04507	-0.0636043	0.938821	0.999762	8.16218	7.33204	2.0921	10.2636	4.02294	2.5874
hsa-miR-4254	1.14857	0.199837	0.845198	0.999762	3.43145	6.16411	4.46315	0.062583	10.2675	5.80587
hsa-miR-221-5p	1.38259	0.467373	0.549145	0.999762	9.06169	11.6794	45.5381	29.3514	32.1235	30.0391
hsa-miR-6852-5p	-1.91431	-0.936822	0.253147	0.999762	11.5936	5.96945	3.34736	1.94007	3.54259	5.49033
hsa-miR-6742-3p	1.49925	0.584241	0.426903	0.999762	43.5761	48.8586	88.9841	105.014	125.912	40.9566
hsa-miR-486-5p	2.48399	1.31266	0.263507	0.999762	0.666301	0.324427	2.65	3.06657	3.84281	2.01943
hsa-miR-6748-3p	1.83	0.871845	0.445867	0.999762	0.766246	1.10305	3.62631	1.81491	2.82206	5.30101
hsa-miR-1914-5p	1.30445	0.383441	0.770184	0.999762	3.69797	0.259541	0.41842	3.12915	0.120088	2.52429
hsa-miR-1266-3p	1.0491	0.0691467	0.943423	0.999762	2.03222	6.09922	2.51052	5.94539	1.08079	4.10197
hsa-miR-205-5p	2.35365	1.2349	0.350491	0.999762	0.033315	1.94656	0.557894	2.25299	1.38101	2.27186
hsa-miR-6734-3p	1.56412	0.64535	0.424346	0.999762	18.9563	9.34349	20.1539	2.5659	40.1093	33.1313
hsa-miR-3667-3p	-1.44464	-0.530712	0.466054	0.999762	20.7553	14.9885	25.8026	10.0759	12.0088	20.5099
hsa-miR-320a-5p	1.4224	0.508325	0.674005	0.999762	0.26652	3.24427	3.13815	2.44074	0.780571	6.18451
hsa-miR-1237-3p	1.56155	0.642977	0.402863	0.999762	20.7886	19.5954	16.5276	31.1038	24.3178	33.8886
hsa-miR-1248	2.17011	1.11777	0.296042	0.999762	6.56306	0.908395	0.697367	11.0772	0.600439	6.18451
hsa-miR-10397-5p	-1.24361	-0.314538	0.707073	0.999762	5.29709	8.04578	5.23026	8.07321	3.4225	3.40779
hsa-miR-6841-3p	1.64762	0.720386	0.581895	0.999762	2.09885	0.259541	0.0697367	1.25166	1.5011	1.38836
hsa-miR-212-5p	-1.1155	-0.157686	0.847759	0.999762	26.6187	30.4312	72.7354	43.683	32.844	39.6945
hsa-miR-3189-3p	1.16118	0.215592	0.856241	0.999762	3.13161	0	6.41578	5.13181	3.36246	2.5874
hsa-miR-3121-5p	-2.38229	-1.25235	0.235555	0.999762	5.3304	7.5267	2.58026	0.062583	3.12228	3.28158
hsa-miR-551a	-2.88163	-1.52689	0.224233	0.999762	0.26652	6.09922	2.30131	0.125166	0.900659	1.95633
hsa-miR-1307-5p	1.37707	0.461602	0.508527	0.999762	11.5603	19.0114	9.06578	18.8375	15.3112	20.3837
hsa-miR-375-5p	1.32636	0.407469	0.618796	0.999762	8.09555	4.21755	6.62499	3.88015	11.2282	10.0972
hsa-miR-3131	-3.06987	-1.61818	0.13206	0.999762	1.23266	9.21372	2.78947	2.37816	1.08079	0.820395
hsa-miR-151a-5p	1.43415	0.520197	0.532337	0.999762	2328.19	1939.62	5409.69	5957.22	3429.17	4492.48
hsa-miR-106b-3p	1.40812	0.493774	0.578262	0.999762	7.46257	3.24427	4.88157	1.00133	15.3712	5.61655
hsa-miR-6767-5p	-1.52553	-0.609314	0.502566	0.999762	3.16493	14.8587	1.04605	5.06923	3.24237	4.16508
hsa-miR-1249-3p	1.97037	0.978465	0.288298	0.999762	1.49918	2.59541	5.02104	3.37948	6.18452	8.20395
hsa-miR-1281	1.92818	0.947241	0.225681	0.999762	6.52975	1.94656	12.4131	7.94805	13.63	18.6798
hsa-miR-6078	1.68019	0.748621	0.422768	0.999762	5.13051	2.01144	2.92894	5.06923	7.02514	5.1748
hsa-miR-6880-3p	-1.04667	-0.0658009	0.957655	0.999762	1.39923	1.36259	3.55657	0.062583	2.04149	3.91265
hsa-miR-1292-3p	-1.08188	-0.113539	0.881528	0.999762	6.62969	17.3244	3.55657	6.38347	12.0088	7.00491
hsa-miR-579-5p	-1.704	-0.768926	0.312935	0.999762	40.0447	36.7251	10.6	21.9041	16.0317	13.3787
hsa-miR-6812-3p	1.26072	0.334248	0.747634	0.999762	5.93008	3.1145	0.278947	1.87749	2.94215	7.00491
hsa-miR-6825-3p	-1.92952	-0.948242	0.338415	0.999762	3.29819	5.19083	1.39473	1.50199	2.16158	1.45147
hsa-miR-10392-5p	-1.2311	-0.299943	0.743442	0.999762	2.19879	12.5229	1.53421	4.50598	1.98145	6.68937
hsa-miR-4315	-1.45455	-0.540571	0.485729	0.999762	17.2572	12.0038	7.88025	7.13447	5.16378	13.3156
hsa-miR-6125	-1.73682	-0.796452	0.249006	0.999762	77.1576	190.633	63.321	43.0571	87.9043	59.6364
hsa-miR-5091	-1.83733	-0.877613	0.499806	0.999762	0.366465	8.69463	0.557894	0.438081	0.360263	4.41751
hsa-miR-127-3p	1.4283	0.514295	0.447103	0.999762	44181.8	30812.4	113671	54836.5	90318.3	124314
hsa-miR-105-3p	-1.31878	-0.399201	0.600584	0.999762	20.1223	33.6755	17.1552	22.217	8.3461	23.2235
hsa-miR-4304	1.33994	0.422171	0.744479	0.999762	0.13326	0.194656	0.488157	0.125166	0.480351	0.378644
hsa-miR-10392-3p	1.09778	0.13459	0.852302	0.999762	16.924	20.6984	9.62367	13.5805	20.0547	18.3011
hsa-miR-1908-3p	1.07164	0.0998263	0.892239	0.999762	3.89786	10.187	11.8552	6.69638	11.4684	9.46609
hsa-miR-1234-3p	1.59404	0.672691	0.494278	0.999762	3.39813	4.99617	0.557894	3.12915	3.36246	7.8253
hsa-miR-4285	-1.08285	-0.11484	0.911502	0.999762	3.46476	4.02289	1.60394	0.750996	3.18233	4.48062
hsa-miR-6741-3p	-1.3219	-0.402612	0.622247	0.999762	74.559	36.0114	17.0855	25.3461	29.4215	41.9032
hsa-miR-11400	-1.52123	-0.605236	0.418884	0.999762	14.592	11.1603	11.925	10.5139	6.72492	7.69909
hsa-miR-6746-5p	1.01178	0.0169021	0.984024	0.999762	7.7624	25.9541	1.95263	11.0772	16.0317	8.96123
hsa-miR-7112-5p	1.94271	0.958068	0.456272	0.999762	3.19824	0.129771	0.348684	4.69373	0.420307	2.14565
hsa-miR-6777-5p	-1.03042	-0.0432313	0.953176	0.999762	10.1278	13.6908	10.8789	15.8961	5.94435	11.8011
hsa-miR-542-5p	1.51458	0.598914	0.421942	0.999762	103.11	28.2251	310.886	197.137	215.558	257.036
hsa-miR-5090	-1.41116	-0.496878	0.707195	0.999762	1.13271	4.21755	0.20921	0.187749	3.48255	0.252429
hsa-miR-4508	1.04608	0.0649939	0.934039	0.999762	2.16548	15.5076	9.69341	7.19705	13.3898	7.95152
hsa-miR-4787-5p	2.24831	1.16884	0.284099	0.999762	1.79901	0.324427	3.97499	7.19705	4.9236	1.57768
hsa-miR-137-5p	-1.7676	-0.82179	0.380793	0.999762	2.09885	11.4847	1.88289	3.12915	3.12228	2.46118
hsa-miR-125b-1-3p	-1.00712	-0.0102426	0.987697	0.999762	270.785	185.572	461.657	221.231	293.975	396.251
hsa-miR-4746-5p	-1.44784	-0.533898	0.461982	0.999762	23.0873	21.1526	12.9013	11.6404	9.48694	18.4273
hsa-miR-598-5p	1.41002	0.495716	0.715854	0.999762	1.86564	0.129771	1.04605	0.062583	3.0022	1.26215
hsa-miR-1250-5p	-1.42859	-0.514596	0.722271	0.999762	0.13326	2.85495	0.348684	0.312915	1.74127	0.252429
hsa-miR-6786-5p	1.71255	0.776145	0.491105	0.999762	2.29874	1.03817	0.836841	2.75365	1.44105	3.21847
hsa-miR-101-2-5p	1.03552	0.0503558	0.97036	0.999762	0.033315	0.259541	1.67368	1.00133	0.420307	0.567966
hsa-miR-6070	1.96616	0.975383	0.173243	0.999762	65.4307	91.9425	186.964	107.768	152.391	416.761
hsa-miR-126-3p	1.26393	0.337916	0.631054	0.999762	168.308	68.9082	299.031	89.6815	249.002	339.075
hsa-miR-6506-3p	2.13972	1.09742	0.38402	0.999762	0.19989	0	6.41578	2.37816	2.10154	9.65541
hsa-miR-1181	1.15203	0.204179	0.819678	0.999762	9.12832	9.08395	1.46447	2.06524	8.52623	12.1166
hsa-miR-4536-3p	-1.67452	-0.743749	0.573006	0.999762	5.3304	0.194656	0.767104	1.25166	0.0600439	2.46118
hsa-miR-1204	-1.89105	-0.919187	0.226572	0.999762	58.8677	144.435	42.5394	68.2781	23.8374	37.8644
hsa-miR-6774-3p	-1.09007	-0.124422	0.86496	0.999762	19.4893	25.8244	28.9407	17.3355	21.3756	29.2187
hsa-miR-187-3p	1.54916	0.631482	0.489081	0.999762	3.29819	3.04961	3.13815	5.88281	5.76421	3.09226
hsa-miR-1306-3p	1.2204	0.287354	0.681544	0.999762	8.26213	10.1221	4.81183	8.63646	6.4247	13.3156
hsa-miR-5707	1.49977	0.584742	0.622685	0.999762	0.26652	4.02289	1.11579	2.31557	1.38101	4.3544
hsa-miR-1282	-1.5057	-0.590431	0.542514	0.999762	6.8629	6.94273	0.767104	4.31823	2.10154	3.28158
hsa-miR-4744	-1.31015	-0.389729	0.676768	0.999762	6.09665	3.89312	2.37105	3.06657	4.44325	2.01943
hsa-miR-4509	-1.93695	-0.953785	0.273381	0.999762	6.22991	8.56486	3.4171	2.06524	6.18452	1.13593
hsa-miR-190b-3p	1.11169	0.152751	0.898372	0.999762	1.3326	3.37404	0.278947	2.12782	1.20088	2.20875
hsa-miR-4521	-1.39538	-0.480658	0.447839	0.999762	230.04	154.038	207.955	124.978	89.5255	209.832
hsa-miR-4735-5p	1.36204	0.445765	0.772632	0.999762	2.09885	0	0.139473	0.563247	2.52184	0
hsa-miR-1283	3.01881	1.59398	0.405424	0.999762	0.033315	0	0	0.062583	0	0.126215
hsa-miR-139-5p	1.22815	0.296488	0.698809	0.999762	5.49698	27.0572	13.25	18.1491	18.7337	19.2477
hsa-miR-138-1-3p	1.61935	0.695413	0.35003	0.999762	27.3183	22.5801	19.6658	18.2742	63.5865	30.8595
hsa-miR-4305	-1.29009	-0.367472	0.809041	0.999762	0.033315	1.7519	1.81316	1.06391	0	1.7039
hsa-miR-520g-5p	-1.02069	-0.0295495	0.966841	0.999762	12.3266	19.9198	10.8092	25.0958	8.04588	9.02434
hsa-miR-645	-1.04138	-0.0584981	0.963905	0.999762	3.43145	0.194656	1.25526	3.62982	1.02075	0.0631073
hsa-miR-628-3p	-1.00852	-0.0122403	0.987392	0.999762	5.39703	15.9618	21.0605	16.0213	8.94654	16.9759
hsa-miR-325	-1.58945	-0.66853	0.408366	0.999762	44.0758	175.839	17.6434	44.872	68.2099	36.3498
hsa-miR-554	1.70672	0.771226	0.440629	0.999762	4.79736	0.0648853	6.27631	9.51262	7.62558	1.89322
hsa-miR-6080	1.07413	0.103171	0.94312	0.999762	1.39923	0	0.20921	0.62583	1.02075	0.126215
hsa-miR-1284	1.128	0.173769	0.840414	0.999762	5.43035	3.69846	24.896	7.88546	13.3898	17.039
hsa-miR-6731-3p	-3.52078	-1.81589	0.176735	0.999762	3.56471	0.259541	0.767104	0.125166	0.360263	0.820395
hsa-miR-26a-1-3p	-1.33518	-0.417038	0.584049	0.999762	11.1272	4.08778	15.5513	6.50864	3.72272	12.8108
hsa-miR-371a-5p	-1.7436	-0.802065	0.495021	0.999762	1.69907	3.1145	1.74342	0.938746	2.34171	0.441751
hsa-miR-372-5p	-1.00218	-0.0031425	0.997505	0.999762	2.03222	2.79007	3.27763	1.43941	4.80351	1.767
hsa-miR-342-3p	1.24239	0.313118	0.65687	0.999762	163.177	135.61	508.52	292.012	267.616	443.266
hsa-miR-6511a-3p	1.51435	0.598697	0.394679	0.999762	5.43035	6.55342	10.8092	7.50996	10.988	15.8399
hsa-miR-6784-3p	-3.1405	-1.651	0.130784	0.999762	3.06498	12.7824	0.557894	1.18908	0.420307	3.59712
hsa-miR-1304-3p	1.29964	0.378107	0.613168	0.999762	20.0223	16.6755	35.7749	35.422	21.6758	36.9809
hsa-miR-6787-3p	-1.7971	-0.845671	0.386752	0.999762	4.4309	4.15266	3.62631	3.56723	2.04149	1.19904
hsa-miR-3664-3p	-1.12396	-0.16859	0.830345	0.999762	19.9557	34.5839	3.62631	12.6418	21.2555	17.8594
hsa-miR-1266-5p	1.0821	0.113832	0.89053	0.999762	6.26323	8.11067	1.74342	9.45004	4.74347	3.28158
hsa-miR-4797-3p	1.14388	0.193939	0.923077	0.999762	0.0666301	3937.18	0	4501.79	0	1.95633
hsa-miR-4264	-1.45361	-0.539638	0.439655	0.999762	7.69577	11.2252	16.3881	6.38347	9.66707	8.07773
hsa-miR-6870-3p	1.53167	0.615102	0.631859	0.999762	2.49863	0	2.0921	3.12915	0.720527	3.21847
hsa-miR-6758-3p	3.5794	1.83972	0.174841	0.999762	0.566356	0	0.836841	1.81491	2.64193	0.631073
hsa-miR-519d-5p	-1.37445	-0.458855	0.652427	0.999762	3.63134	5.12594	0.836841	2.00266	2.28167	2.71361
hsa-miR-5695	-1.93709	-0.953894	0.215826	0.999762	19.0562	13.4961	6.97367	6.2583	4.68342	9.5292
hsa-miR-766-3p	1.12615	0.171397	0.813673	0.999762	6.99616	16.0267	16.2487	9.38746	13.9902	20.6992
hsa-miR-3925-3p	1.23424	0.30362	0.687533	0.999762	23.4538	13.4961	21.0605	13.1424	31.463	27.073
hsa-miR-136-5p	1.05544	0.0778443	0.92586	0.999762	19.5892	10.8358	83.8236	16.8974	52.9587	50.6751
hsa-miR-150-5p	2.20411	1.1402	0.34549	0.999762	0.0999451	1.42748	2.71973	1.56458	3.72272	3.97576
hsa-miR-532-3p	1.73465	0.794641	0.355157	0.999762	35.7803	68.3891	70.5736	17.711	264.493	20.8885
hsa-miR-2116-3p	1.53167	0.615104	0.563441	0.999762	4.89731	0.194656	2.92894	2.81624	3.36246	6.18451
hsa-miR-4469	1.06411	0.0896465	0.903582	0.999762	17.8235	8.11067	11.2974	7.7603	17.3527	14.6409
hsa-miR-7113-3p	1.598	0.676272	0.449746	0.999762	7.46257	0.713739	4.11447	5.19439	8.8865	5.67966
hsa-miR-4287	1.06085	0.0852174	0.908401	0.999762	14.5587	19.4007	14.0171	6.69638	19.6944	24.4856
hsa-miR-3605-3p	1.14073	0.189959	0.813138	0.999762	55.9693	31.664	63.042	28.3501	48.5755	94.9765
hsa-miR-1976	1.1169	0.159505	0.84716	0.999762	8.36207	6.6183	6.27631	2.12782	11.2282	10.4127
hsa-miR-6814-3p	-2.13499	-1.09423	0.422017	0.999762	2.16548	0.324427	1.95263	0.062583	0.120088	1.89322
hsa-miR-3917	1.24189	0.312541	0.735069	0.999762	23.3205	4.67174	68.8302	4.75631	42.391	73.0782
hsa-miR-1307-3p	1.17806	0.236416	0.734888	0.999762	149.851	62.9388	362.84	155.143	227.026	295.91
hsa-miR-4638-5p	-1.07229	-0.10069	0.913097	0.999762	3.66465	3.958	7.39209	3.56723	7.50549	2.83983
hsa-miR-8088	-1.12266	-0.166922	0.8749	0.999762	5.99671	4.15266	0.20921	5.25697	3.36246	0.631073
hsa-miR-520f-5p	-3.37457	-1.7547	0.185905	0.999762	3.0983	0.129771	1.11579	0.375498	0.780571	0.126215
hsa-miR-519a-2-5p	-1.37597	-0.460445	0.766348	0.999762	0.033315	0	0.767104	0.500664	0.0600439	0
hsa-miR-517-5p	-1.7626	-0.817703	0.368525	0.999762	5.29709	18.9465	1.18552	6.88413	4.68342	2.83983
hsa-miR-1251-5p	1.02059	0.0294083	0.971519	0.999762	2.79846	14.2748	5.85789	9.82554	5.04369	8.45638
hsa-miR-12125	1.52958	0.613132	0.446415	0.999762	9.59473	10.3168	11.7855	10.7017	6.72492	31.0488
hsa-miR-6845-3p	-1.17806	-0.23641	0.757867	0.999762	5.86345	6.74807	3.97499	3.94273	4.80351	5.42723
hsa-miR-3615	-1.23585	-0.305498	0.658857	0.999762	15.3915	21.0877	13.9473	12.1411	17.3527	11.2331
hsa-miR-7110-3p	-1.67256	-0.742059	0.355111	0.999762	14.492	39.4503	6.0671	5.13181	18.7337	11.9904
hsa-miR-6817-3p	-1.17688	-0.234971	0.767777	0.999762	5.99671	10.8358	5.23026	6.44605	4.98364	7.25734
hsa-miR-146a-3p	1.42897	0.514976	0.588291	0.999762	17.024	0.194656	5.16052	15.0199	11.3483	5.67966
hsa-miR-301a-5p	1.22356	0.291089	0.740087	0.999762	5.69687	3.17938	5.64868	9.26229	0.960702	7.57287
hsa-miR-3921	1.06417	0.0897252	0.900221	0.999762	9.26158	12.6526	4.39341	10.5765	7.62558	9.84474
hsa-miR-6728-3p	1.19451	0.256425	0.785669	0.999762	7.62914	0.454197	4.95131	5.38214	3.24237	7.00491
hsa-miR-518c-5p	-1.877	-0.908428	0.256537	0.999762	9.82793	19.1412	11.0184	13.1424	5.10373	3.02915
hsa-miR-326	1.60555	0.683068	0.408683	0.999762	4.83068	2.07633	7.39209	6.2583	6.90505	9.78163
hsa-miR-6764-3p	-1.70549	-0.770188	0.334062	0.999762	13.2927	21.6717	6.48552	10.8894	6.78496	6.62626
hsa-miR-6515-3p	1.00812	0.0116633	0.993068	0.999762	2.19879	0	1.53421	1.12649	0.960702	1.7039
hsa-miR-1236-3p	-2.0224	-1.01607	0.176617	0.999762	12.3932	15.2481	8.29867	8.69904	5.16378	3.91265
hsa-miR-130b-5p	1.2248	0.292549	0.67371	0.999762	212.683	54.4388	309.073	165.219	170.705	369.809
hsa-miR-130a-5p	-1.52317	-0.607073	0.441257	0.999762	3.96449	9.40837	9.34472	4.0679	5.40395	5.30101
hsa-miR-4766-5p	1.42167	0.507584	0.604689	0.999762	1.3326	3.89312	1.81316	2.9414	2.40176	4.54372
hsa-miR-12113	-1.11473	-0.15669	0.873705	0.999762	7.39594	4.34732	0.41842	2.25299	2.58189	6.12141
hsa-miR-4427	2.95916	1.56519	0.265159	0.999762	2.63189	0.129771	0.20921	5.63247	0	3.28158
hsa-miR-5187-3p	-1.59482	-0.673395	0.594075	0.999762	3.26487	0.194656	4.88157	3.94273	0.900659	0.378644
hsa-miR-4680-3p	1.08086	0.112184	0.934295	0.999762	4.6641	0	1.325	0.312915	3.60263	2.5874
hsa-miR-6730-3p	2.79724	1.484	0.12835	0.999762	2.83178	5.06106	2.44079	25.1584	2.82206	0.946609
hsa-miR-3660	3.14124	1.65133	0.113594	0.999762	2.39868	0.324427	1.325	3.62982	2.28167	7.06802
hsa-miR-6719-3p	1.27719	0.352974	0.776982	0.999762	5.23046	0.0648853	0.41842	3.6924	0.960702	2.71361
hsa-miR-4750-3p	-1.29198	-0.369583	0.686549	0.999762	5.23046	11.9389	0.697367	5.75764	5.22382	2.83983
hsa-miR-345-5p	1.06256	0.08754	0.898381	0.999762	188.796	61.3815	224.971	117.969	145.606	241.322
hsa-miR-4329	1.18016	0.238981	0.769926	0.999762	17.2572	20.5038	40.517	8.32354	31.9434	52.0635
hsa-miR-6761-5p	1.90477	0.92962	0.301386	0.999762	3.53139	3.30915	1.67368	6.00797	4.56334	6.0583
hsa-miR-1199-5p	-1.00467	-0.00672045	0.993298	0.999762	7.46257	9.40837	3.76578	7.13447	5.52404	7.95152
hsa-miR-7162-3p	-2.05153	-1.0367	0.305878	0.999762	1.29929	12.0038	4.53289	6.00797	1.14083	1.51457
hsa-miR-4682	2.21391	1.1466	0.384347	0.999762	1.29929	0.0648853	2.58026	2.25299	6.36465	0.126215
hsa-miR-3151-3p	1.07258	0.101087	0.898577	0.999762	17.1906	14.4694	65.2736	17.3355	31.1628	55.4082
hsa-miR-4502	-1.04021	-0.0568783	0.945676	0.999762	37.4461	65.9235	14.575	21.0905	61.3048	30.9857
hsa-miR-3920	2.51508	1.3306	0.321682	0.999762	0.166575	2.27099	0.0697367	1.25166	1.74127	3.28158
hsa-miR-29a-5p	-1.41787	-0.50373	0.539767	0.999762	17.557	4.67174	26.0815	4.63114	10.6278	18.806
hsa-miR-4772-3p	-1.27811	-0.35401	0.775181	0.999762	5.26377	0.129771	1.81316	1.43941	3.90285	0.315536
hsa-miR-2276-3p	2.01618	1.01163	0.403359	0.999762	2.96504	0.0648853	1.60394	2.06524	3.60263	3.78644
hsa-miR-3130-3p	1.59219	0.671014	0.558115	0.999762	1.23266	2.6603	0.627631	3.25432	2.28167	1.64079
hsa-miR-4793-3p	1.99974	0.999809	0.334992	0.999762	2.23211	0.259541	4.81183	3.81757	7.74566	3.02915
hsa-miR-1184	-1.99636	-0.99737	0.299726	0.999762	2.36537	10.3817	2.92894	3.44207	2.22162	2.14565
hsa-miR-10394-5p	1.48459	0.570061	0.574243	0.999762	0.46641	6.29388	1.81316	3.81757	6.06443	2.77672
hsa-miR-17-3p	-1.3846	-0.469467	0.54761	0.999762	14.4587	2.53053	16.3881	5.00664	6.4247	12.6846
hsa-miR-20a-3p	2.80273	1.48683	0.323723	0.999762	0	0	2.23158	0.750996	1.26092	4.22819
hsa-miR-4769-3p	-1.16385	-0.218909	0.816871	0.999762	6.99616	1.10305	5.43947	2.9414	4.32316	4.41751
hsa-miR-1913	1.04144	0.0585835	0.945296	0.999762	42.5766	28.0305	46.3749	13.0173	51.5177	57.3014
hsa-miR-18a-3p	-1.10356	-0.142167	0.837535	0.999762	16.3244	14.0152	14.9934	8.44871	15.1311	17.5438
hsa-miR-191-3p	-1.06543	-0.0914351	0.906527	0.999762	30.983	17.2595	44.5618	9.26229	25.5187	52.3159
hsa-miR-4734	-1.29609	-0.374167	0.661743	0.999762	5.69687	8.56486	2.65	1.50199	2.4618	9.08745
hsa-miR-4520-5p	-2.17727	-1.12252	0.346884	0.999762	3.49808	1.23282	3.4171	0.125166	2.28167	1.32525
hsa-miR-767-3p	-1.11374	-0.155415	0.90694	0.999762	1.06608	0.259541	2.30131	2.81624	0.240176	0.189322
hsa-miR-93-3p	1.72294	0.784876	0.486035	0.999762	2.53194	0.259541	4.67236	1.18908	6.24457	5.42723
hsa-miR-3692-5p	1.30904	0.388509	0.7277	0.999762	9.59473	0.519083	4.95131	0.062583	4.98364	14.704
hsa-miR-875-3p	-1.30297	-0.381809	0.619853	0.999762	12.1267	11.4198	10.6	9.76295	5.464	11.0438
hsa-miR-6128	-1.51718	-0.601394	0.567312	0.999762	3.79791	7.78624	1.67368	3.25432	5.34391	0.126215
hsa-miR-378a-3p	1.49622	0.581318	0.401429	0.999762	208.386	94.473	346.243	408.918	249.362	312.886
hsa-miR-378j	-1.21552	-0.281579	0.730947	0.999762	6.76295	4.02289	4.95131	3.81757	7.14522	2.01943
hsa-miR-3128	2.8426	1.50721	0.192484	0.999762	2.13216	0.129771	1.60394	5.75764	2.04149	3.34469
hsa-miR-6868-5p	1.22683	0.29493	0.799765	0.999762	5.49698	0.324427	0.348684	1.18908	3.18233	3.28158
hsa-miR-4720-5p	-2.75134	-1.46013	0.113139	0.999762	15.1917	59.1754	1.25526	14.4567	8.46619	4.54372
hsa-miR-3190-5p	1.18321	0.2427	0.749346	0.999762	10.994	10.9656	4.39341	6.75897	9.24676	15.272
hsa-miR-3176	-1.00497	-0.00715637	0.992534	0.999762	11.7602	24.7213	13.7381	15.8961	8.46619	25.5585
hsa-miR-4794	1.00751	0.0107931	0.993272	0.999762	2.96504	0.0648853	3.62631	3.62982	2.70198	0.378644
hsa-miR-149-5p	1.23382	0.303133	0.710622	0.999762	3192.51	1873.95	4948.59	3611.54	3369.72	5375.48
hsa-miR-3064-5p	-1.08568	-0.118599	0.87916	0.999762	7.46257	16.9351	6.55525	10.952	7.02514	10.4758
hsa-miR-204-3p	1.38963	0.474702	0.55351	0.999762	32.2489	14.7939	31.6605	7.69771	37.6475	64.0539
hsa-miR-3192-5p	2.41339	1.27106	0.286459	0.999762	2.23211	0.129771	1.325	3.75498	3.90285	1.38836
hsa-miR-619-5p	-1.3592	-0.442761	0.557097	0.999762	5.89676	8.04578	7.88025	6.19572	3.72272	5.99519
hsa-miR-4486	1.47176	0.557538	0.648934	0.999762	2.53194	0.194656	0.41842	1.62716	0.660483	2.46118
hsa-miR-378g	-1.00447	-0.00643889	0.993968	0.999762	3.0983	12.7175	5.78815	10.3888	3.54259	7.50977
hsa-miR-4667-5p	-1.80365	-0.850917	0.427926	0.999762	2.63189	3.43892	3.55657	2.25299	2.40176	0.631073
hsa-miR-7155-5p	1.05858	0.0821339	0.91991	0.999762	2.83178	9.14883	3.13815	7.7603	2.70198	5.49033
hsa-miR-6861-5p	-1.57705	-0.657227	0.585487	0.999762	4.33095	1.88167	0.767104	2.19041	0.180132	2.08254
hsa-miR-6776-5p	-1.19773	-0.260304	0.802791	0.999762	7.0961	4.99617	0.627631	8.26096	1.56114	0.820395
hsa-miR-4774-5p	-3.22805	-1.69066	0.234863	0.999762	6.26323	0.0648853	0.139473	0.187749	1.68123	0.126215
hsa-miR-7152-3p	1.04288	0.0605688	0.930469	0.999762	9.99451	21.2824	10.3908	19.213	15.011	9.15056
hsa-miR-4299	1.59821	0.676455	0.358688	0.999762	14.0256	7.0725	9.55393	18.7749	16.6322	14.0098
hsa-miR-548q	-1.79867	-0.846933	0.311007	0.999762	10.3943	5.45037	3.20789	4.4434	2.70198	3.53401
hsa-miR-4456	-1.15183	-0.203932	0.78848	0.999762	4.93062	15.1832	8.9263	8.26096	13.0896	3.78644
hsa-miR-7978	-1.12524	-0.17023	0.817662	0.999762	32.1157	24.916	12.7618	22.968	20.2348	18.9953
hsa-miR-29b-1-5p	-1.36797	-0.452034	0.538638	0.999762	44.4089	19.2709	30.4052	17.5858	15.5514	35.7187
hsa-miR-20b-3p	-1.13374	-0.181088	0.791105	0.999762	15.2916	15.1183	16.1092	16.7723	10.8079	13.4419
hsa-miR-4742-3p	-1.68584	-0.75347	0.571264	0.999762	0.766246	6.55342	0.0697367	0.750996	3.4225	0.189322
hsa-miR-6773-3p	1.72114	0.783365	0.253765	0.999762	210.818	93.8891	302.448	234.123	382.059	428.814
hsa-miR-215-3p	2.2353	1.16047	0.24611	0.999762	3.03167	4.34732	0.20921	7.19705	2.70198	7.13112
hsa-miR-4677-3p	1.63889	0.71272	0.522238	0.999762	1.29929	1.94656	2.02237	3.3169	3.30241	1.767
hsa-miR-4679	1.17888	0.237415	0.769643	0.999762	13.1928	13.1068	6.34604	22.7802	5.28386	10.4758
hsa-miR-6529-3p	-1.90734	-0.931565	0.371279	0.999762	3.46476	5.51525	2.58026	0.876162	2.76202	2.39808
hsa-miR-5008-3p	1.24411	0.315117	0.699501	0.999762	8.56196	6.16411	2.02237	10.2636	4.32316	6.37384
hsa-miR-7114-5p	-2.80453	-1.48776	0.199056	0.999762	0.899506	5.96945	2.99868	1.25166	0.960702	1.26215
hsa-miR-134-3p	1.35566	0.438991	0.542825	0.999762	5.3304	12.1984	5.43947	12.5792	8.3461	10.0972
hsa-miR-26b-3p	-1.35907	-0.442621	0.539453	0.999762	12.0934	5.19083	16.3184	6.13314	9.3068	9.27677
hsa-miR-1267	1.28967	0.367006	0.682225	0.999762	4.13106	3.43892	3.4171	4.88148	5.94435	3.53401
hsa-miR-302a-5p	-2.60649	-1.38211	0.220541	0.999762	2.46531	8.37021	7.25262	0	5.464	1.45147
hsa-miR-550b-3p	1.32994	0.411361	0.736568	0.999762	2.06553	0.0648853	1.46447	0.750996	3.06224	1.00972
hsa-miR-676-5p	-3.0167	-1.59297	0.221859	0.999762	1.7657	5.96945	0.0697367	0.813579	0.180132	1.57768
hsa-miR-412-3p	1.88475	0.914375	0.41232	0.999762	2.63189	0.129771	4.04473	3.25432	4.9236	4.66994
hsa-miR-6837-3p	1.47681	0.56248	0.446474	0.999762	25.5859	18.4923	41.5631	42.8068	34.5252	49.0344
hsa-miR-942-5p	1.07596	0.105624	0.89943	0.999762	29.0174	30.3014	56.2775	45.3101	27.1999	51.748
hsa-miR-3182	1.00583	0.00838412	0.990958	0.999762	32.9486	25.435	24.8263	33.2942	37.8877	12.5583
hsa-miR-4778-3p	1.35248	0.435607	0.678416	0.999762	4.39758	0.0648853	7.46183	7.0093	5.52404	3.59712
hsa-miR-4635	-1.80071	-0.848568	0.348953	0.999762	11.1272	1.55725	4.04473	2.19041	4.86356	2.27186
hsa-miR-432-5p	1.40774	0.493382	0.464047	0.999762	205.62	157.217	461.657	457.419	320.574	382.556
hsa-miR-643	1.05068	0.0713176	0.925135	0.999762	11.7269	8.49998	13.1802	8.82421	10.1474	16.1555
hsa-miR-3655	-1.89884	-0.92512	0.26597	0.999762	7.26268	10.771	9.20525	2.12782	3.48255	8.70881
hsa-miR-581	1.45933	0.54531	0.675259	0.999762	2.23211	0	3.76578	1.18908	1.26092	6.31073
hsa-miR-302b-5p	-3.72932	-1.89891	0.224334	0.999762	8.4287	0.0648853	0	0	0.120088	2.14565
hsa-miR-3124-3p	1.88064	0.911225	0.388543	0.999762	4.23101	0.129771	3.06842	7.0093	0.840615	6.18451
hsa-miR-9-5p	-1.24065	-0.311091	0.672867	0.999762	27.4849	43.2785	12.4131	20.0892	20.7752	26.1895
hsa-miR-627-3p	-1.08767	-0.121239	0.900772	0.999762	1.66575	7.98089	5.57894	4.81889	1.9214	7.19423
hsa-miR-570-3p	-1.35981	-0.443406	0.639381	0.999762	4.16438	2.59541	9.83288	5.50731	4.56334	2.08254
hsa-miR-494-3p	1.13472	0.182337	0.801856	0.999762	16.0912	3.958	19.9447	12.8295	18.3734	14.1991
hsa-miR-4738-3p	-1.70219	-0.767392	0.431394	0.999762	6.79627	4.8664	3.20789	3.25432	5.04369	0.441751
hsa-miR-5681a	-2.12708	-1.08887	0.17324	0.999762	12.0267	25.435	4.25394	9.9507	5.10373	4.54372
hsa-miR-6730-5p	-2.3422	-1.22786	0.182282	0.999762	5.93008	7.91601	4.32368	1.81491	4.02294	1.89322
hsa-miR-4680-5p	2.65004	1.40601	0.320039	0.999762	0.0999451	0	2.58026	4.4434	0.180132	2.46118
hsa-miR-3185	1.71073	0.774613	0.35419	0.999762	4.96394	0.713739	6.34604	8.01063	6.66487	5.93208
hsa-miR-4699-5p	-1.46254	-0.54848	0.555443	0.999762	7.56251	26.3434	1.18552	2.9414	8.22601	12.8108
hsa-miR-7706	1.08895	0.122933	0.890428	0.999762	1.79901	5.12594	7.88025	8.26096	2.10154	5.67966
hsa-miR-3928-5p	3.19716	1.67679	0.135376	0.999762	0.732931	0.97328	1.67368	1.50199	4.3832	4.73305
hsa-miR-1252-5p	-1.69004	-0.75706	0.407607	0.999762	5.06388	4.28243	3.55657	2.00266	3.78277	1.89322
hsa-miR-605-3p	-1.36773	-0.451781	0.741606	0.999762	2.86509	0.129771	0.627631	0.500664	1.9214	0.252429
hsa-miR-4493	1.0265	0.0377296	0.96108	0.999762	9.62804	12.3282	6.34604	5.94539	15.8516	7.25734
hsa-miR-7515	1.18976	0.250674	0.788012	0.999762	12.0934	21.0228	0.348684	5.31956	21.3156	13.1894
hsa-miR-3179	-1.6527	-0.724822	0.603153	0.999762	4.23101	0.0648853	0.278947	0.187749	2.4618	0.126215
hsa-miR-493-3p	1.18669	0.246943	0.77151	0.999762	874.486	602.785	2161.98	1301.04	1355.91	1661.61
hsa-miR-5585-5p	-2.57121	-1.36245	0.283509	0.999762	2.33205	0.389312	1.18552	0.375498	0.660483	0.504858
hsa-miR-4795-5p	1.62821	0.703284	0.381764	0.999762	4.89731	8.04578	3.76578	5.82022	13.2697	8.07773
hsa-miR-4670-3p	-1.52576	-0.609524	0.605837	0.999762	8.39539	12.458	2.16184	14.8948	0.120088	0.0631073
hsa-miR-15b-3p	1.06376	0.089178	0.920325	0.999762	34.5477	8.49998	77.9657	43.6204	31.8833	53.1994
hsa-miR-4790-3p	-1.76172	-0.816986	0.328538	0.999762	7.12942	9.53814	2.99868	6.13314	2.70198	2.33497
hsa-miR-10393-5p	1.53113	0.614598	0.419783	0.999762	14.4587	9.40837	16.4579	23.0306	9.8472	28.9031
hsa-miR-219b-3p	1.08756	0.121092	0.882506	0.999762	8.49533	2.91984	5.85789	11.7656	4.80351	2.27186
hsa-miR-549a-3p	1.08549	0.118351	0.937356	0.999762	1.53249	0	0.20921	1.43941	0.180132	0.315536
hsa-miR-642a-3p	-1.9825	-0.987322	0.2235	0.999762	7.46257	8.75952	4.1842	4.25565	1.38101	4.66994
hsa-miR-3117-5p	-1.74281	-0.801419	0.577464	0.999762	1.83233	0	1.88289	0.312915	1.62119	0.189322
hsa-miR-2277-3p	1.46826	0.554105	0.637236	0.999762	2.19879	0.324427	1.88289	1.37683	1.44105	3.72333
hsa-miR-4645-3p	-1.54816	-0.630554	0.631501	0.999762	0.233205	4.34732	1.74342	3.50465	0.240176	0.315536
hsa-miR-591	1.19693	0.259334	0.796508	0.999762	1.36592	2.98472	3.06842	3.88015	1.98145	2.83983
hsa-miR-1180-5p	-1.85308	-0.889925	0.439429	0.999762	0.999451	10.9656	0.139473	1.37683	3.30241	1.83011
hsa-miR-6859-3p	-1.30232	-0.38108	0.792024	0.999762	6.03002	0.0648853	0.278947	0.062583	0.240176	4.60683
hsa-miR-4725-5p	-1.22282	-0.290214	0.712321	0.999762	11.1605	13.6259	8.9263	5.44472	11.7686	10.3496
hsa-miR-29c-5p	-1.42293	-0.508869	0.475247	0.999762	116.103	135.87	42.2605	114.089	32.0034	60.7092
hsa-miR-6821-3p	-1.60219	-0.680042	0.584332	0.999762	3.56471	0.0648853	2.92894	1.87749	0.960702	1.26215
hsa-miR-3661	1.36973	0.453892	0.643026	0.999762	8.32876	0.129771	11.646	5.75764	7.02514	14.7671
hsa-miR-6759-3p	-3.9579	-1.98474	0.127096	0.999762	1.23266	4.4122	0.348684	0.938746	0.240176	0.315536
hsa-miR-6786-3p	2.88189	1.52701	0.236349	0.999762	1.16603	0.389312	0.348684	0.312915	1.5011	3.84954
hsa-miR-6831-3p	-2.46368	-1.30082	0.289419	0.999762	0.299835	3.69846	3.90526	1.50199	0.720527	0.946609
hsa-miR-10525-3p	2.77981	1.47499	0.124865	0.999762	4.96394	0.0648853	4.60262	9.38746	8.76641	8.70881
hsa-miR-4522	-1.15568	-0.208742	0.785194	0.999762	124.632	64.6907	19.1776	77.1023	61.3649	42.0295
hsa-miR-4513	-1.36046	-0.444092	0.740256	0.999762	0.19989	0.129771	1.88289	0.250332	1.02075	0.315536
hsa-miR-6857-3p	-1.12269	-0.166954	0.850038	0.999762	1.43255	11.6794	5.85789	5.31956	9.24676	2.27186
hsa-miR-617	1.07029	0.0980022	0.931519	0.999762	3.63134	2.53053	0.557894	1.31424	5.34391	0.567966
hsa-miR-6505-3p	-2.26801	-1.18143	0.285744	0.999762	9.16163	1.36259	1.11579	0.813579	0.420307	3.91265
hsa-miR-539-5p	1.04615	0.0650927	0.926964	0.999762	31.8492	32.1831	33.8223	26.41	26.4794	49.4761
hsa-miR-589-5p	1.86038	0.895594	0.275472	0.999762	5.69687	3.04961	6.41578	15.458	7.62558	5.1748
hsa-miR-146a-5p	-1.27285	-0.348061	0.666493	0.999762	32.5821	42.2403	80.1275	39.6776	45.9936	35.908
hsa-miR-1253	-1.29044	-0.367859	0.627824	0.999762	46.9076	106.671	30.8934	43.6204	56.3812	42.913
hsa-miR-6770-5p	-1.51939	-0.603492	0.3949	0.999762	12.2599	26.9923	9.13551	12.7669	10.2675	8.77191
hsa-miR-4524a-3p	1.01016	0.0145799	0.984844	0.999762	6.56306	6.09922	7.11315	3.06657	6.30461	10.602
hsa-miR-4786-5p	-1.3826	-0.467384	0.549296	0.999762	4.03112	10.4465	9.55393	4.63114	7.50549	5.11169
hsa-miR-769-5p	1.48987	0.575182	0.497808	0.999762	5.86345	4.8664	18.6197	4.75631	16.6922	22.2138
hsa-miR-873-3p	2.0473	1.03372	0.259266	0.999762	2.432	1.03817	3.76578	7.13447	4.26312	3.40779
hsa-miR-4693-3p	-2.15813	-1.10978	0.26516	0.999762	5.56361	4.60686	1.81316	2.81624	1.32097	1.45147
hsa-miR-143-3p	1.1275	0.173129	0.841012	0.999762	4513.92	2795.32	11612.8	5495.23	4572.64	11266.7
hsa-miR-4708-5p	-1.26404	-0.338039	0.682032	0.999762	2.36537	8.04578	9.20525	5.25697	3.72272	6.43694
hsa-miR-5186	-1.66288	-0.733681	0.362396	0.999762	10.261	34.519	5.71841	18.9001	3.18233	8.26705
hsa-miR-4468	-1.62729	-0.702472	0.576412	0.999762	1.19934	4.28243	0.41842	0.125166	0.960702	2.52429
hsa-miR-1225-3p	2.61736	1.38811	0.140873	0.999762	4.59747	0.324427	3.34736	4.88148	7.3854	9.5292
hsa-miR-1233-3p	-1.54379	-0.626479	0.556193	0.999762	4.59747	7.00761	0.348684	5.19439	2.04149	0.504858
hsa-miR-4537	1.28136	0.357676	0.726653	0.999762	3.9978	2.72518	3.97499	0.375498	5.64413	7.69909
hsa-miR-2114-3p	1.87895	0.909928	0.287118	0.999762	12.2599	0.583968	3.69605	12.9547	9.18672	9.08745
hsa-miR-339-3p	-1.02296	-0.0327548	0.965814	0.999762	15.1917	39.3854	22.9434	24.47	29.0012	22.1507
hsa-miR-610	-1.95244	-0.965281	0.352922	0.999762	13.5259	0.583968	0.906578	3.19173	2.94215	1.57768
hsa-miR-3670	3.19257	1.67472	0.214704	0.999762	1.93227	0.0648853	0.20921	4.56856	0.120088	2.52429
hsa-miR-3160-3p	1.12357	0.168093	0.830762	0.999762	12.0267	6.03433	11.925	6.88413	11.3483	15.5244
hsa-miR-558	-2.56942	-1.36144	0.283199	0.999762	3.13161	0.0648853	3.76578	0.813579	1.44105	0.441751
hsa-miR-4487	1.12899	0.175032	0.817594	0.999762	22.2211	7.65647	20.6421	15.458	16.9924	24.6749
hsa-miR-27b-5p	-1.02844	-0.0404561	0.970271	0.999762	17.1572	0	23.4315	10.3888	5.22382	23.8546
hsa-miR-4751	-2.84496	-1.50841	0.191722	0.999762	1.73238	12.6526	0.278947	0.250332	0.720527	4.16508
hsa-miR-3150b-3p	2.06296	1.04472	0.204381	0.999762	4.93062	9.01906	2.65	23.8441	2.34171	8.07773
hsa-miR-1185-5p	1.01137	0.0163056	0.982054	0.999762	49.7727	58.7212	112.137	94.7507	51.5177	76.7385
hsa-miR-3605-5p	1.13301	0.180156	0.847391	0.999762	6.36317	0.259541	13.1802	4.19306	9.96729	8.26705
hsa-miR-1827	1.10499	0.144028	0.852828	0.999762	43.8093	26.603	105.163	43.5578	54.2797	96.1124
hsa-miR-5008-5p	-2.07291	-1.05166	0.234118	0.999762	37.9125	113.679	9.4842	27.4114	30.142	20.1312
hsa-miR-6089	1.46282	0.548752	0.545539	0.999762	4.33095	7.65647	2.23158	2.87882	2.28167	15.6506
hsa-miR-2467-5p	-1.42525	-0.511218	0.594748	0.999762	7.29599	1.68702	2.71973	1.68974	1.98145	4.60683
hsa-miR-485-5p	-1.03369	-0.0478094	0.9446	0.999762	440.058	648.464	488.018	220.48	406.377	898.269
hsa-miR-3188	-1.52553	-0.609313	0.631772	0.999762	1.26597	7.46181	0	1.18908	4.26312	0.252429
hsa-miR-4510	1.09808	0.134982	0.869762	0.999762	46.8742	17.0648	121.272	31.3541	65.1476	106.841
hsa-miR-3616-3p	2.1745	1.12068	0.404656	0.999762	1.56581	0.0648853	0.348684	2.19041	2.10154	0.126215
hsa-miR-4721	1.41325	0.499017	0.635631	0.999762	2.432	0.194656	11.2974	2.19041	6.54479	10.9176
hsa-miR-3184-5p	-1.0383	-0.0542229	0.939505	0.999762	129.429	62.4846	127.2	35.2968	92.5277	179.54
hsa-miR-1914-3p	-1.61324	-0.689959	0.565202	0.999762	2.6652	2.46564	0.557894	0.688413	2.34171	0.504858
hsa-miR-6804-5p	-2.32539	-1.21747	0.143129	0.999762	2.26542	25.3053	9.20525	4.0679	2.94215	8.77191
hsa-let-7a-5p	1.10835	0.148415	0.820605	0.999762	77094.8	63957.9	171706	107642	94928.3	144075
hsa-miR-202-3p	1.53991	0.622846	0.456383	0.999762	8.72854	0.778624	5.64868	8.19838	9.3068	5.93208
hsa-miR-7854-3p	-1.60467	-0.68228	0.375221	0.999762	8.46202	8.56486	7.81051	2.87882	5.34391	7.25734
hsa-miR-6134	1.72365	0.785468	0.308455	0.999762	15.6247	12.6526	27.4763	35.7975	26.4193	33.6993
hsa-miR-377-5p	1.08289	0.114891	0.869663	0.999762	104.909	60.2785	253.911	98.1928	146.387	209.201
hsa-miR-496	1.09294	0.12821	0.854301	0.999762	68.0293	44.3816	125.945	84.2993	89.3453	86.7725
hsa-miR-5702	1.59261	0.671394	0.513122	0.999762	3.16493	0.583968	3.27763	5.13181	1.38101	4.73305
hsa-miR-4785	1.13104	0.17765	0.878158	0.999762	1.3326	3.30915	1.18552	2.5659	3.4225	0.567966
hsa-miR-924	1.82124	0.864919	0.283052	0.999762	6.46312	2.72518	8.36841	12.3914	5.10373	14.5147
hsa-miR-4765	1.45581	0.541824	0.609195	0.999762	3.9978	0.324427	2.71973	4.69373	1.98145	3.66022
hsa-miR-1909-5p	1.19729	0.259777	0.782134	0.999762	4.03112	5.19083	1.67368	7.7603	3.4225	1.89322
hsa-miR-4481	-1.39929	-0.484694	0.693629	0.999762	1.43255	5.25571	0.348684	1.56458	3.0022	0.441751
hsa-miR-574-5p	-1.03404	-0.0482941	0.953847	0.999762	1258.51	809.639	1583.65	898.755	930.38	1702.45
hsa-miR-3659	1.13669	0.184833	0.86242	0.999762	4.13106	4.34732	0.139473	5.19439	3.24237	1.38836
hsa-miR-4424	-1.34068	-0.422965	0.777392	0.999762	2.13216	0	0.348684	1.37683	0.180132	0.315536
hsa-miR-571	2.21736	1.14884	0.33249	0.999762	2.23211	5.96945	43.3762	112.587	1.20088	0.567966
hsa-miR-190a-5p	1.69988	0.765433	0.438234	0.999762	5.13051	0.129771	5.85789	5.06923	6.54479	7.32044
hsa-miR-3145-3p	2.04767	1.03398	0.434084	0.999762	1.56581	0	0.767104	1.31424	1.5011	2.08254
hsa-miR-383-5p	1.24394	0.314922	0.639046	0.999762	79.7562	78.057	150.771	114.965	100.694	168.055
hsa-miR-4772-5p	3.0325	1.60051	0.217855	0.999762	1.13271	0.129771	0.627631	2.12782	0.660483	3.15536
hsa-miR-4454	-1.49846	-0.583478	0.446372	0.999762	31.4494	11.874	3.90526	6.82155	17.2326	7.50977
hsa-miR-369-5p	1.21124	0.276479	0.743439	0.999762	6921.4	10574.6	15518.2	12726.2	11602.2	15659.2
hsa-miR-4695-3p	-1.89166	-0.91965	0.218774	0.999762	27.7514	25.435	13.7381	11.2024	11.5284	12.7477
hsa-miR-4534	1.7031	0.768164	0.536972	0.999762	3.73128	0.129771	0.627631	1.06391	4.98364	1.7039
hsa-miR-3134	-1.11918	-0.16244	0.850245	0.999762	7.49588	14.0801	1.25526	11.5779	2.64193	6.18451
hsa-miR-8069	1.51534	0.599644	0.55877	0.999762	0.19989	10.4465	0.836841	9.88812	4.20307	3.28158
hsa-miR-219b-5p	-1.30946	-0.388976	0.640322	0.999762	12.9595	21.0228	2.58026	12.3914	8.40615	7.13112
hsa-miR-145-3p	-1.02345	-0.0334473	0.962028	0.999762	16.1245	10.3817	22.4552	8.44871	13.63	25.7478
hsa-miR-509-3p	1.00341	0.00490732	0.995567	0.999762	4.89731	7.20227	1.95263	3.44207	3.36246	7.32044
hsa-miR-508-3p	2.04961	1.03535	0.261973	0.999762	3.3315	5.19083	3.27763	12.5792	11.1682	0.441751
hsa-miR-219a-5p	-1.27864	-0.354608	0.630763	0.999762	11.9601	16.2862	15.2026	16.7723	9.3068	7.8253
hsa-miR-4445-5p	-1.17167	-0.228567	0.782985	0.999762	4.03112	8.62975	2.65	6.82155	2.94215	3.28158
hsa-miR-548aj-5p	2.00587	1.00423	0.29109	0.999762	8.16218	0.129771	4.1842	4.88148	14.1103	6.12141
hsa-miR-1468-3p	1.77716	0.829572	0.552462	0.999762	0.39978	0	5.29999	4.0679	0.240176	5.80587
hsa-miR-891a-5p	1.33567	0.417559	0.722695	0.999762	3.06498	0.389312	0.767104	1.12649	1.74127	2.90294
hsa-miR-891b	-2.56205	-1.3573	0.311318	0.999762	3.63134	3.17938	0.139473	0	1.44105	1.26215
hsa-miR-4696	-1.18217	-0.241434	0.75823	0.999762	32.5821	67.9998	50.071	40.4286	53.1389	33.6993
hsa-miR-4708-3p	1.07425	0.103335	0.909936	0.999762	5.66356	4.80151	2.37105	4.75631	3.60263	5.61655
hsa-miR-8064	1.21504	0.280998	0.844006	0.999762	0.033315	2.59541	0.278947	2.00266	1.38101	0.126215
hsa-miR-5589-3p	-2.43311	-1.2828	0.267669	0.999762	2.39868	3.37404	1.74342	0.688413	1.74127	0.631073
hsa-miR-767-5p	1.53163	0.615072	0.487533	0.999762	1.19934	8.88929	2.16184	3.62982	9.06663	5.99519
hsa-miR-3177-3p	-1.80947	-0.855566	0.327531	0.999762	59.7672	106.996	6.34604	28.6004	33.8047	33.2575
hsa-miR-298	-1.02874	-0.0408838	0.973194	0.999762	0.233205	4.28243	1.95263	3.06657	0.840615	2.33497
hsa-miR-3166	2.84756	1.50972	0.327075	0.999762	0.033315	0.194656	1.18552	3.75498	0.120088	0.126215
hsa-miR-4771	1.46786	0.553711	0.692613	0.999762	0.166575	1.36259	0.41842	1.12649	1.56114	0.126215
hsa-miR-2467-3p	-2.37683	-1.24904	0.185491	0.999762	5.16383	5.25571	2.85921	2.00266	1.5011	2.14565
hsa-miR-103a-3p	1.23877	0.308903	0.645799	0.999762	152.483	67.351	310.189	231.682	176.769	248.075
hsa-miR-1909-3p	-1.95625	-0.96809	0.416725	0.999762	1.36592	4.47709	1.18552	1.25166	0.30022	2.01943
hsa-miR-3665	-1.77251	-0.82579	0.275336	0.999762	10.0611	18.3625	3.69605	6.50864	5.04369	6.56316
hsa-miR-657	-1.25065	-0.322677	0.692066	0.999762	14.2921	31.7938	5.16052	11.703	22.7566	6.50005
hsa-miR-6499-3p	1.86276	0.897442	0.228569	0.999762	39.7448	24.2671	166.81	177.423	97.2711	155.181
hsa-miR-5689	-1.26292	-0.336763	0.782705	0.999762	4.63079	2.6603	0.20921	0.938746	0.480351	4.54372
hsa-miR-7112-3p	-1.29142	-0.368956	0.789769	0.999762	0.39978	0.583968	2.30131	0.375498	0.240176	1.89322
hsa-miR-4711-5p	-1.83643	-0.876906	0.290357	0.999762	4.99725	8.11067	6.48552	1.37683	2.70198	6.56316
hsa-miR-324-5p	1.7364	0.796099	0.305056	0.999762	9.02837	6.03433	15.8302	10.6391	16.8123	26.1264
hsa-miR-6076	-1.98926	-0.992233	0.233384	0.999762	5.49698	11.874	1.81316	1.75232	3.9629	3.91265
hsa-miR-5189-3p	-1.48124	-0.566808	0.654857	0.999762	2.89841	2.33587	0.697367	0.062583	0.540395	3.40779
hsa-miR-4252	-1.45564	-0.541656	0.623177	0.999762	2.39868	0.194656	13.5289	1.25166	4.62338	5.1748
hsa-miR-3194-5p	-1.28196	-0.358346	0.719585	0.999762	7.56251	0.259541	8.57762	2.37816	7.3854	3.02915
hsa-miR-4641	-1.14303	-0.19286	0.804003	0.999762	3.06498	8.24044	4.81183	5.94539	5.34391	2.71361
hsa-miR-5699-5p	-1.32796	-0.409216	0.74676	0.999762	2.96504	0.519083	1.39473	0.250332	3.18233	0.252429
hsa-miR-4758-3p	-1.37184	-0.456113	0.580899	0.999762	2.26542	8.11067	7.74078	4.56856	6.60483	1.95633
hsa-miR-3189-5p	1.83072	0.872412	0.259498	0.999762	3.73128	5.51525	3.27763	9.26229	8.3461	5.2379
hsa-miR-10396a-3p	-1.11004	-0.150616	0.865782	0.999762	12.8929	19.0763	23.571	0.938746	31.403	17.67
hsa-miR-4749-3p	-2.1691	-1.1171	0.184962	0.999762	2.33205	26.7976	9.76314	1.81491	5.10373	10.9807
hsa-miR-210-5p	1.73223	0.792631	0.310508	0.999762	10.1944	4.99617	22.525	10.0133	12.1889	43.1023
hsa-miR-18b-3p	-1.13421	-0.181693	0.90468	0.999762	0.0666301	3.30915	0.0697367	0.375498	0.0600439	2.5874
hsa-miR-4290	1.04497	0.0634662	0.935287	0.999762	6.12997	4.99617	19.7355	4.0679	17.773	10.3496
hsa-miR-7976	2.48855	1.31531	0.254423	0.999762	1.89896	0.194656	1.46447	3.81757	2.76202	2.46118
hsa-miR-3173-5p	1.44086	0.526925	0.534139	0.999762	4.73073	1.03817	7.11315	7.07188	4.68342	6.81559
hsa-miR-938	1.21017	0.275207	0.830333	0.999762	1.96559	1.88167	0.0697367	3.3169	1.26092	0.189322
hsa-miR-4632-3p	1.22556	0.293443	0.68991	0.999762	12.4598	10.0572	22.5947	5.94539	30.6824	18.6166
hsa-miR-6869-3p	1.02134	0.0304576	0.96512	0.999762	31.9824	38.4121	23.5013	25.4713	28.6409	41.8401
hsa-miR-3648	1.04828	0.0680257	0.933883	0.999762	23.9202	57.3586	24.5473	39.4273	48.3954	23.0342
hsa-miR-6743-3p	-1.02089	-0.0298278	0.975506	0.999762	3.23156	5.38548	3.06842	0.62583	4.68342	6.12141
hsa-miR-24-1-5p	2.49334	1.31808	0.164306	0.999762	9.46147	0.194656	9.83288	11.0772	15.4313	22.1507
hsa-miR-6778-3p	1.24837	0.320043	0.682504	0.999762	4.29764	6.81296	6.34604	4.19306	7.98584	9.46609
hsa-miR-6791-3p	1.06234	0.0872498	0.905441	0.999762	12.1267	12.0687	14.7145	7.13447	18.3134	15.8399
hsa-miR-2682-3p	1.88688	0.916005	0.233462	0.999762	7.92898	13.4961	18.7592	53.1956	9.18672	13.3787
hsa-miR-4763-5p	-1.56576	-0.646866	0.388115	0.999762	9.22826	13.6259	6.62499	3.06657	5.40395	10.3496
hsa-miR-3116	1.47727	0.562931	0.451141	0.999762	20.3555	25.5648	7.81051	24.1571	22.8767	32.4371
hsa-miR-661	1.07881	0.109445	0.902122	0.999762	10.5275	0.648853	2.37105	4.75631	6.78496	3.15536
hsa-miR-214-5p	1.43804	0.524101	0.543559	0.999762	1294.19	315.602	1245.57	943.815	1757.67	1404.71
hsa-miR-6811-3p	1.14662	0.197383	0.829577	0.999762	2.83178	7.26716	2.58026	4.19306	5.52404	4.73305
hsa-miR-4297	1.29451	0.372408	0.639123	0.999762	4.33095	5.77479	5.23026	5.19439	6.36465	8.01463
hsa-miR-4312	-1.1102	-0.150818	0.892173	0.999762	4.89731	2.85495	0.348684	4.0679	2.94215	0.315536
hsa-miR-1273c	3.4055	1.76787	0.175947	0.999762	1.3326	0.194656	0.0697367	2.69107	1.26092	1.83011
hsa-miR-3683	-1.22785	-0.296129	0.691699	0.999762	6.72964	8.88929	6.0671	3.50465	4.74347	9.40299
hsa-miR-381-5p	1.36459	0.448469	0.536445	0.999762	9.095	10.1221	15.8302	13.8934	17.3527	16.2186
hsa-miR-3195	-1.1152	-0.1573	0.832089	0.999762	14.0256	29.1335	31.7302	22.6551	30.9226	13.4419
hsa-miR-668-5p	-1.49598	-0.581094	0.494744	0.999762	8.06224	4.73663	4.25394	1.37683	7.26531	2.77672
hsa-miR-6720-3p	-1.38921	-0.474262	0.533555	0.999762	29.4838	14.8587	18.1316	7.32221	15.3112	22.4031
hsa-miR-4783-5p	1.38195	0.466702	0.586406	0.999762	3.49808	17.7786	3.4171	9.01196	18.4335	6.62626
hsa-miR-4479	-1.27932	-0.355382	0.659685	0.999762	6.06334	12.0038	2.44079	3.12915	8.40615	4.48062
hsa-miR-2277-5p	-2.11901	-1.08339	0.172567	0.999762	12.3266	31.0801	6.0671	4.00531	8.46619	10.8545
hsa-miR-658	-1.89092	-0.91909	0.352299	0.999762	3.56471	3.89312	2.44079	0.876162	2.16158	2.20875
hsa-miR-6820-5p	1.05518	0.077484	0.929173	0.999762	3.9978	6.35876	6.90394	2.87882	12.249	3.02915
hsa-miR-1199-3p	-1.40716	-0.492789	0.541068	0.999762	6.79627	6.87784	2.85921	2.50332	6.24457	3.02915
hsa-miR-3960	1.39059	0.475692	0.53963	0.999762	30.8164	35.622	18.9684	21.3408	62.5657	34.8983
hsa-miR-4767	-1.19868	-0.261447	0.795836	0.999762	2.63189	5.06106	8.1592	0.563247	9.8472	2.77672
hsa-miR-10396a-5p	-1.45401	-0.540035	0.438585	0.999762	108.107	92.0723	86.4038	24.9706	84.4818	87.656
hsa-miR-3621	1.00168	0.00242325	0.997318	0.999762	9.12832	22.2557	12.7618	7.07188	19.3341	17.7331
hsa-miR-4746-3p	1.48619	0.571614	0.63668	0.999762	0.26652	2.14122	1.11579	1.68974	2.70198	0.757287
hsa-miR-6853-5p	-1.78593	-0.836678	0.377949	0.999762	12.7597	7.26716	0.20921	3.3169	4.74347	3.28158
hsa-miR-6854-3p	-1.26772	-0.342234	0.801741	0.999762	3.66465	0	3.13815	1.87749	3.36246	0.126215
hsa-miR-187-5p	1.23454	0.303971	0.699455	0.999762	12.4265	6.55342	9.62367	8.32354	10.6878	16.471
hsa-miR-548v	2.35706	1.23699	0.277759	0.999762	1.69907	0.519083	3.13815	0.375498	3.36246	8.89813
hsa-miR-221-3p	1.35969	0.443277	0.639553	0.999762	60046	15772.2	53208.5	28605.8	47212	99618.4
hsa-miR-621	3.78521	1.92037	0.147816	0.999762	0.19989	0.259541	0.20921	0.250332	0.30022	2.01943
hsa-miR-8086	-2.86741	-1.51975	0.182398	0.999762	2.6652	2.40076	2.99868	1.37683	0.660483	0.757287
hsa-miR-31-3p	1.47288	0.558636	0.388253	0.999762	126.93	70.9197	249.309	187.749	223.904	246.876
hsa-miR-7158-5p	2.30078	1.20212	0.397554	0.999762	0.632986	0	0.278947	1.81491	0.120088	0.252429
hsa-miR-3934-3p	1.49649	0.58158	0.521768	0.999762	4.26432	7.91601	1.74342	3.50465	2.64193	14.704
hsa-miR-549a-5p	1.22533	0.29317	0.780727	0.999762	6.1966	0.194656	2.0921	5.06923	3.0022	2.39808
hsa-miR-6847-3p	-1.0966	-0.133041	0.866208	0.999762	5.46367	10.3168	3.20789	3.81757	9.24676	4.22819
hsa-miR-7106-3p	1.17216	0.229169	0.808982	0.999762	4.59747	1.36259	5.23026	3.37948	4.98364	4.79615
hsa-miR-4268	1.18305	0.242505	0.755663	0.999762	6.49643	23.4236	4.60262	10.5139	21.1955	9.08745
hsa-miR-4448	-1.19746	-0.25998	0.819441	0.999762	2.73183	2.01144	2.16184	2.25299	0.720527	2.83983
hsa-miR-423-3p	1.24704	0.318511	0.708589	0.999762	3738.11	1278.95	5789.68	2821.81	3747.52	6907.16
hsa-miR-1301-5p	1.62287	0.698546	0.540651	0.999762	2.13216	0.194656	1.04605	1.37683	2.10154	2.14565
hsa-miR-3194-3p	-1.13622	-0.184242	0.855191	0.999762	6.16328	4.21755	0.767104	6.44605	1.26092	2.14565
hsa-miR-4663	1.30709	0.386355	0.783014	0.999762	0.932821	0.519083	0.278947	1.94007	0.180132	0.189322
hsa-miR-7160-5p	-1.41207	-0.49781	0.647472	0.999762	4.6641	7.98089	1.39473	0.062583	6.90505	2.96604
hsa-miR-8077	-1.47324	-0.558995	0.55122	0.999762	5.13051	5.96945	1.88289	4.50598	1.62119	2.71361
hsa-miR-6882-3p	1.25416	0.326725	0.783999	0.999762	2.09885	2.91984	0.557894	3.12915	0.420307	3.4709
hsa-miR-3135b	1.11596	0.158291	0.836868	0.999762	7.82903	27.2518	3.20789	15.3328	15.2512	12.1166
hsa-miR-1287-5p	1.00656	0.00943664	0.990039	0.999762	34.581	25.6946	44.0039	46.8747	27.0198	31.0488
hsa-miR-5580-5p	-1.97801	-0.984048	0.188757	0.999762	10.361	6.68319	7.11315	4.75631	4.14303	3.4709
hsa-miR-4731-5p	1.36696	0.450971	0.546322	0.999762	9.16163	9.34349	3.13815	7.32221	12.7894	9.59231
hsa-miR-5589-5p	-1.78146	-0.833063	0.291705	0.999762	22.7875	45.29	9.27499	18.0239	7.02514	18.3642
hsa-miR-6131	1.19263	0.254142	0.741555	0.999762	902.238	1705.96	1696.76	1814.97	1472.16	1846.77
hsa-miR-4718	1.02344	0.0334229	0.962846	0.999762	107.341	40.748	92.1222	59.2661	52.5384	134.103
hsa-miR-4999-5p	-1.16003	-0.214156	0.861681	0.999762	3.03167	0.583968	2.65	0.187749	4.08299	1.13593
hsa-miR-626	-1.3007	-0.379292	0.651573	0.999762	7.12942	14.8587	2.23158	7.13447	3.78277	7.69909
hsa-miR-4804-3p	-1.68383	-0.751743	0.507172	0.999762	4.26432	0.324427	5.23026	3.00399	0.30022	2.52429
hsa-miR-2115-5p	2.02191	1.01572	0.400333	0.999762	2.26542	0.0648853	2.23158	3.44207	4.26312	1.57768
hsa-miR-516a-3p	1.20593	0.270152	0.704985	0.999762	13.5592	23.0343	8.50788	17.3981	19.9346	17.039
hsa-miR-103a-1-5p	-1.2532	-0.325621	0.699633	0.999762	8.96174	11.8091	6.13683	1.37683	4.44325	15.6506
hsa-miR-4327	1.22152	0.288675	0.727274	0.999762	52.9376	20.1793	79.1512	45.8734	36.5667	103.559
hsa-miR-3160-5p	-2.3382	-1.2254	0.277282	0.999762	1.89896	2.07633	5.09078	0.813579	1.80132	1.19904
hsa-miR-1251-3p	1.21832	0.284889	0.702757	0.999762	24.1201	8.75952	20.8513	7.94805	26.9597	30.607
hsa-miR-3140-3p	1.33979	0.422007	0.720492	0.999762	1.86564	0	10.5302	1.68974	7.26531	7.63598
hsa-miR-3148	-1.31756	-0.397868	0.702899	0.999762	16.9907	0.0648853	1.81316	8.82421	3.12228	2.39808
hsa-miR-6124	-1.55716	-0.638916	0.465295	0.999762	6.12997	4.15266	5.78815	2.81624	3.72272	3.91265
hsa-miR-147b-5p	-1.78681	-0.837384	0.290744	0.999762	6.89621	7.91601	3.34736	2.75365	5.70417	1.7039
hsa-miR-5093	-1.92802	-0.947123	0.387121	0.999762	1.79901	4.80151	5.92762	2.19041	0.180132	4.10197
hsa-miR-7-5p	1.45089	0.536935	0.531586	0.999762	4790.93	5310.54	13367.8	15828.3	10775.8	7446.98
hsa-miR-6077	1.00705	0.0101341	0.990063	0.999762	3.96449	11.29	4.88157	4.81889	11.2883	4.10197
hsa-miR-6828-5p	-1.51646	-0.600707	0.484862	0.999762	3.69797	10.6412	2.30131	5.38214	3.54259	2.01943
hsa-miR-671-5p	-1.34289	-0.42534	0.591755	0.999762	57.3685	29.0037	180.339	106.078	61.0646	31.4274
hsa-miR-3202	-1.32843	-0.409726	0.593157	0.999762	87.9184	107.45	71.5499	11.3901	93.6685	95.86
hsa-miR-1-3p	-1.72059	-0.782901	0.298522	0.999762	8.89511	9.14883	5.16052	4.88148	3.78277	4.92237
hsa-miR-711	-1.35026	-0.433235	0.699813	0.999762	1.16603	2.27099	2.0921	0.876162	1.68123	1.38836
hsa-miR-6861-3p	-1.42194	-0.507862	0.544187	0.999762	2.33205	16.0916	4.88157	2.50332	4.44325	9.40299
hsa-miR-492	2.23746	1.16186	0.141322	0.999762	4.06443	3.50381	2.92894	8.76162	8.82645	6.50005
hsa-miR-184	-1.99779	-0.998401	0.280397	0.999762	2.53194	10.9007	4.7421	3.88015	2.76202	2.39808
hsa-miR-4740-5p	-2.90907	-1.54056	0.137482	0.999762	3.83123	10.3168	1.81316	0.813579	4.14303	0.504858
hsa-miR-1288-3p	1.80939	0.855504	0.48249	0.999762	1.26597	1.68702	2.0921	2.12782	0.180132	6.81559
hsa-miR-4515	-3.22666	-1.69004	0.129557	0.999762	3.79791	3.37404	2.92894	0.813579	1.74127	0.567966
hsa-miR-4434	1.04041	0.0571467	0.936003	0.999762	10.8607	21.9312	14.2263	18.2117	17.773	12.7477
hsa-miR-139-3p	1.22955	0.298125	0.798203	0.999762	1.19934	0.259541	6.62499	2.31557	2.22162	5.36412
hsa-miR-185-5p	1.32317	0.404003	0.574428	0.999762	55.7694	34.0648	90.3788	71.1569	86.8835	80.3356
hsa-miR-5192	1.249	0.320779	0.684845	0.999762	4.49753	5.06106	6.90394	9.51262	5.40395	5.49033
hsa-miR-6081	-1.27859	-0.354554	0.665516	0.999762	7.69577	6.35876	4.95131	9.63779	3.54259	1.7039
hsa-miR-505-5p	-1.24126	-0.311805	0.669922	0.999762	10.7608	5.77479	14.7145	9.07454	6.12448	9.97095
hsa-miR-766-5p	-2.98592	-1.57817	0.212079	0.999762	5.56361	0.0648853	5.85789	0.250332	0.240176	3.34469
hsa-miR-11181-3p	-1.40272	-0.488232	0.646221	0.999762	1.9989	9.79768	1.18552	1.68974	6.845	0.69418
hsa-miR-6894-5p	-1.73802	-0.797441	0.282785	0.999762	7.59583	35.2327	10.5302	8.88679	11.3483	10.4127
hsa-miR-3612	2.62122	1.39024	0.314313	0.999762	0.0666301	1.10305	0.627631	0.62583	3.78277	0.252429
hsa-miR-1249-5p	-1.04815	-0.0678417	0.962599	0.999762	0.13326	1.7519	1.74342	0	3.12228	0.315536
hsa-miR-3689d	-1.96949	-0.977825	0.193717	0.999762	17.2239	7.13739	4.53289	4.63114	6.00439	4.10197
hsa-miR-1289	-3.28698	-1.71676	0.126298	0.999762	1.03277	4.15266	3.55657	1.12649	0.480351	1.00972
hsa-miR-504-3p	-2.08409	-1.05942	0.280835	0.999762	2.432	8.88929	4.25394	3.75498	3.24237	0.441751
hsa-miR-122-5p	1.56763	0.648581	0.410967	0.999762	4.96394	4.67174	2.0921	7.25963	7.14522	4.16508
hsa-miR-4653-3p	2.76932	1.46953	0.382559	0.999762	0.666301	0	0.627631	3.62982	0	0
hsa-miR-5191	1.54216	0.624951	0.508358	0.999762	4.16438	2.01144	2.85921	7.88546	1.80132	4.3544
hsa-miR-3201	-1.40084	-0.486296	0.532162	0.999762	8.02892	24.5915	5.92762	7.82288	13.0896	6.56316
hsa-miR-6744-5p	-1.10639	-0.145865	0.850456	0.999762	14.0256	6.16411	20.8513	15.0825	12.9695	9.02434
hsa-miR-1255a	1.59886	0.677042	0.388897	0.999762	6.66301	2.07633	12.7618	13.1424	14.7708	6.43694
hsa-miR-1193	-1.18845	-0.249085	0.758229	0.999762	6.72964	11.6145	2.23158	4.75631	6.12448	6.43694
hsa-miR-4764-5p	-1.75982	-0.815427	0.352989	0.999762	6.62969	11.4198	1.325	2.25299	2.82206	5.93208
hsa-miR-4320	-1.86297	-0.897607	0.265046	0.999762	10.9606	4.34732	2.58026	3.12915	1.86136	4.66994
hsa-miR-3167	3.28363	1.71529	0.210776	0.999762	1.83233	0	0.348684	0.125166	3.9629	3.21847
hsa-miR-1290	-2.12411	-1.08686	0.200972	0.999762	10.0611	12.3282	2.92894	2.62849	5.8843	3.40779
hsa-miR-196a-3p	-1.11656	-0.159055	0.889317	0.999762	1.43255	0.389312	3.06842	2.87882	0.600439	0.883502
hsa-miR-31-5p	1.64539	0.718433	0.415571	0.999762	921.494	203.415	1567.4	1145.83	1578.85	1705.22
hsa-miR-6809-5p	1.08064	0.11188	0.902477	0.999762	2.432	6.35876	4.04473	4.4434	2.64193	6.68937
hsa-miR-593-5p	-1.03688	-0.0522443	0.971908	0.999762	0.0999451	0.0648853	4.32368	0.563247	3.4225	0.315536
hsa-miR-564	-2.62996	-1.39504	0.156703	0.999762	22.1878	74.3586	0.557894	6.82155	12.7293	17.3545
hsa-miR-885-3p	1.38996	0.475044	0.55192	0.999762	4.99725	4.21755	11.2276	7.88546	10.1474	10.2234
hsa-miR-1207-5p	2.31873	1.21334	0.172307	0.999762	4.4309	0.259541	7.11315	6.13314	8.76641	12.4952
hsa-miR-4736	1.79167	0.841302	0.538476	0.999762	0.599671	0.0648853	1.67368	1.00133	1.26092	1.89322
hsa-miR-34a-5p	1.88381	0.913655	0.307557	0.999762	4694.05	3101.58	18570.4	21083	12171.2	16414.3
hsa-miR-1256	-1.31212	-0.391898	0.632622	0.999762	5.83013	2.6603	12.7618	7.7603	3.54259	4.85926
hsa-miR-3926	-1.15843	-0.212172	0.866284	0.999762	0.433095	3.37404	0.627631	3.12915	0.360263	0.315536
hsa-miR-4529-5p	-1.56085	-0.642328	0.442283	0.999762	5.3304	8.43509	5.5092	1.12649	1.68123	9.5292
hsa-miR-3136-3p	-2.31124	-1.20867	0.130963	0.999762	6.49643	15.6374	2.51052	3.19173	4.9236	2.52429
hsa-miR-874-5p	-1.27775	-0.353607	0.772555	0.999762	3.73128	0.194656	2.02237	0.62583	0.900659	3.15536
hsa-miR-1538	-1.01544	-0.0221076	0.975233	0.999762	35.4805	34.4541	25.5934	15.2077	49.3561	29.5342
hsa-miR-1291	1.06332	0.0885732	0.906492	0.999762	14.492	29.5877	51.396	32.6683	50.4369	18.3011
hsa-miR-6851-3p	-1.66322	-0.733981	0.353523	0.999762	7.0961	5.58014	7.39209	4.56856	4.50329	3.02915
hsa-miR-4743-5p	-1.16582	-0.221339	0.875037	0.999762	3.36482	0.0648853	0.278947	0.125166	1.32097	1.767
hsa-miR-4757-5p	1.5564	0.638216	0.480561	0.999762	8.26213	0.519083	4.60262	4.31823	8.46619	8.14084
hsa-miR-6735-3p	-1.21034	-0.275412	0.715422	0.999762	10.1611	14.8587	3.20789	10.8894	4.56334	7.88841
hsa-miR-6717-5p	-1.24251	-0.313262	0.697333	0.999762	23.1873	33.2862	5.71841	22.1544	18.1933	9.71852
hsa-miR-8053	1.44958	0.53563	0.72852	0.999762	1.73238	0	0.20921	2.44074	0.240176	0.189322
hsa-miR-6722-5p	-1.80392	-0.851135	0.532991	0.999762	2.89841	0.129771	1.11579	1.87749	0.240176	0.189322
hsa-miR-6789-3p	-1.56083	-0.642314	0.42231	0.999762	21.0884	33.935	18.8987	3.94273	27.6802	15.7137
hsa-miR-4634	-1.23052	-0.299265	0.747604	0.999762	2.99835	4.73663	4.88157	1.75232	2.94215	5.49033
hsa-miR-25-5p	1.04299	0.0607309	0.941638	0.999762	24.3866	20.4389	9.62367	2.81624	28.8211	25.1798
hsa-miR-10400-5p	1.13528	0.183042	0.821409	0.999762	46.3412	72.5418	31.1723	25.0958	88.3246	56.9228
hsa-miR-10396b-5p	1.95217	0.965078	0.261941	0.999762	6.79627	6.74807	10.8092	3.62982	11.6485	32.2478
hsa-miR-6069	1.35669	0.440088	0.582825	0.999762	30.7831	29.6526	45.1894	73.0344	18.6136	51.6218
hsa-miR-4284	-1.08981	-0.12408	0.865138	0.999762	11.6603	8.88929	15.7605	12.6418	13.8101	6.81559
hsa-miR-24-3p	1.0293	0.0416566	0.962246	0.999762	13938.6	6357.79	24225.4	14272.1	18507.2	13046.7
hsa-miR-10398-5p	-1.84067	-0.880233	0.320729	0.999762	4.26432	8.43509	4.1842	2.75365	2.94215	3.40779
hsa-miR-6822-3p	-1.34301	-0.425467	0.680836	0.999762	6.56306	4.67174	0.139473	3.3169	2.4618	2.71361
hsa-miR-760	1.03825	0.0541581	0.946217	0.999762	31.8492	10.3817	56.9749	20.4647	45.153	37.3595
hsa-miR-604	-1.27893	-0.354942	0.642534	0.999762	14.0589	11.4198	11.0184	8.82421	6.90505	12.937
hsa-miR-6762-3p	1.53737	0.620463	0.62295	0.999762	0.39978	0.324427	2.30131	1.94007	1.74127	0.883502
hsa-miR-3652	-2.10593	-1.07446	0.201086	0.999762	10.7274	25.3702	4.39341	2.75365	7.74566	8.70881
hsa-miR-4505	-1.23931	-0.309543	0.66691	0.999762	7.69577	16.0916	6.0671	7.88546	7.50549	8.6457
hsa-miR-7974	1.13354	0.180829	0.810683	0.999762	13.1928	8.11067	40.3078	20.2143	20.8352	28.7138
hsa-miR-4687-3p	1.20979	0.274762	0.739592	0.999762	6.79627	8.30532	2.78947	1.68974	6.66487	13.3156
hsa-miR-6815-3p	1.15517	0.208106	0.816768	0.999762	3.69797	2.27099	6.76446	5.00664	4.3832	5.2379
hsa-miR-3119	-1.52887	-0.612465	0.535863	0.999762	4.26432	2.40076	2.71973	3.25432	2.22162	0.69418
hsa-miR-4668-5p	-1.24037	-0.310774	0.766563	0.999762	3.03167	5.51525	1.74342	3.75498	4.02294	0.504858
hsa-miR-3153	-1.83853	-0.878551	0.389773	0.999762	5.93008	9.40837	0.278947	3.50465	2.4618	2.52429
hsa-miR-1292-5p	-1.99184	-0.9941	0.230345	0.999762	67.7628	83.7021	20.9908	21.5286	28.4008	36.6653
hsa-miR-4471	-4.00939	-2.00338	0.12728	0.999762	0.166575	9.53814	1.46447	1.06391	0.0600439	1.64079
hsa-miR-4747-5p	1.272	0.347094	0.720326	0.999762	7.72909	0.129771	9.83288	3.06657	9.66707	9.78163
hsa-miR-6716-5p	1.63423	0.708614	0.566332	0.999762	6.39649	0.0648853	0.139473	2.81624	2.88211	5.1748
hsa-miR-3649	1.30558	0.384686	0.70812	0.999762	3.43145	2.46564	1.74342	3.81757	3.12228	3.4709
hsa-miR-92b-5p	-1.85147	-0.888675	0.300526	0.999762	39.6449	79.4845	15.9	15.6458	30.3222	26.9468
hsa-miR-3199	-1.30617	-0.385341	0.724586	0.999762	4.09775	8.04578	0.557894	0.187749	4.9236	4.60683
hsa-miR-365a-5p	1.00239	0.00343993	0.997036	0.999762	10.9606	3.24427	1.25526	1.12649	4.14303	10.2865
hsa-miR-6878-5p	-1.63175	-0.70642	0.533402	0.999762	3.79791	0.324427	6.90394	1.50199	4.9236	0.315536
hsa-miR-6731-5p	-1.02887	-0.0410548	0.958153	0.999762	16.6908	21.7366	45.3289	20.2143	23.8374	37.2333
hsa-miR-6827-5p	-1.30853	-0.387944	0.598016	0.999762	9.79462	11.874	4.1842	6.44605	7.98584	5.36412
hsa-miR-6090	-1.87266	-0.905087	0.282578	0.999762	21.7214	58.9159	11.8552	8.94937	34.1049	6.31073
hsa-miR-4300	1.2213	0.288419	0.792425	0.999762	1.59912	6.16411	0.348684	3.50465	3.54259	2.83983
hsa-miR-149-3p	1.80673	0.853382	0.470792	0.999762	1.73238	0.324427	0.767104	1.87749	1.26092	2.20875
hsa-miR-6799-5p	1.16143	0.215906	0.793983	0.999762	16.291	2.59541	9.62367	7.13447	10.928	15.1457
hsa-miR-4713-3p	-1.26148	-0.335115	0.67828	0.999762	33.415	59.4998	25.175	17.3981	39.3288	36.8547
hsa-miR-5187-5p	-1.44069	-0.526756	0.460288	0.999762	16.1245	21.3473	14.2263	10.0133	6.30461	19.5633
hsa-miR-6721-5p	1.25997	0.333386	0.795389	0.999762	0.033315	4.21755	1.11579	0.938746	4.02294	1.767
hsa-miR-3945	-1.32899	-0.410332	0.767643	0.999762	1.36592	0.519083	0.278947	1.12649	0.30022	0.252429
hsa-miR-4253	-1.41724	-0.503088	0.652941	0.999762	4.46421	0.129771	6.13683	3.25432	0.780571	3.53401
hsa-miR-4640-5p	-1.85772	-0.893534	0.375298	0.999762	2.6652	5.83968	2.23158	1.43941	0.600439	3.72333
hsa-miR-6508-3p	-1.71498	-0.778193	0.301758	0.999762	5.13051	18.6221	6.20657	6.00797	5.28386	6.12141
hsa-miR-296-5p	-1.2411	-0.311623	0.683754	0.999762	17.9235	14.4045	31.5907	7.69771	19.2741	24.4856
hsa-miR-6877-5p	-1.69991	-0.765456	0.30513	0.999762	6.22991	33.4808	10.6697	7.50996	11.4083	10.6651
hsa-miR-9899	-2.18065	-1.12476	0.18813	0.999762	6.79627	7.91601	4.11447	1.12649	5.28386	2.20875
hsa-miR-10394-3p	-2.21759	-1.14899	0.168432	0.999762	7.29599	21.5419	2.92894	1.56458	7.62558	5.11169
hsa-miR-585-3p	-1.57915	-0.659148	0.618954	0.999762	0.766246	3.30915	0.488157	2.31557	0.240176	0.315536
hsa-miR-1268a	1.83048	0.872222	0.274576	0.999762	22.6875	9.79768	18.8987	46.9373	26.8396	20.4468
hsa-miR-664b-5p	1.05081	0.0715	0.955154	0.999762	0.299835	0.454197	0.278947	0.62583	0.240176	0.189322
hsa-miR-4437	-1.04325	-0.0610888	0.946247	0.999762	1.59912	13.9503	2.44079	6.38347	1.74127	9.08745
hsa-miR-4656	-1.26618	-0.340485	0.805952	0.999762	1.49918	0.194656	0.627631	1.37683	0.240176	0.252429
hsa-miR-6829-5p	1.21692	0.28323	0.774908	0.999762	3.73128	6.42365	0.488157	6.07055	2.04149	4.85926
hsa-miR-4492	-1.03866	-0.0547182	0.944086	0.999762	17.5903	42.2403	36.7513	13.5179	49.5963	29.7866
hsa-miR-4675	1.17659	0.234615	0.759333	0.999762	8.66191	6.03433	6.8342	7.50996	7.9258	10.2865
hsa-miR-27a-5p	1.06678	0.0932682	0.907532	0.999762	35.5138	28.1602	52.2328	36.8614	37.6475	49.0344
hsa-miR-4271	-2.16516	-1.11447	0.185992	0.999762	9.16163	3.63358	10.1118	2.00266	3.78277	4.79615
hsa-miR-3144-5p	1.33752	0.419563	0.758035	0.999762	0.0999451	1.7519	0.557894	0.876162	1.14083	1.13593
hsa-miR-3175	-1.74653	-0.804494	0.37282	0.999762	13.4926	3.63358	1.46447	3.75498	5.28386	1.64079
hsa-miR-1343-5p	-1.61857	-0.694717	0.412804	0.999762	11.9268	4.28243	5.57894	1.25166	8.94654	3.28158
hsa-miR-6825-5p	-2.33056	-1.22068	0.215642	0.999762	1.73238	21.2824	2.85921	4.75631	6.00439	0.315536
hsa-miR-4450	-1.00564	-0.00810734	0.991904	0.999762	55.9026	55.9311	40.2381	61.2688	23.297	66.7044
hsa-miR-486-3p	-1.15006	-0.20171	0.838679	0.999762	0.666301	7.20227	3.69605	3.37948	2.76202	3.84954
hsa-miR-6762-5p	1.93982	0.955926	0.241373	0.999762	1.9989	4.67174	3.83552	10.5139	4.32316	5.36412
hsa-miR-3180	-1.31006	-0.389632	0.61801	0.999762	16.2244	33.0266	10.8092	7.69771	22.2162	15.903
hsa-miR-4489	-1.02201	-0.0314124	0.966442	0.999762	5.06388	9.14883	13.3895	6.94672	16.452	3.53401
hsa-miR-4283	-2.56462	-1.35874	0.205817	0.999762	0.433095	7.39693	5.57894	1.62716	1.9214	1.64079
hsa-miR-185-3p	-1.38037	-0.465059	0.578467	0.999762	3.23156	15.7671	6.0671	5.06923	5.76421	7.25734
hsa-miR-625-5p	1.16097	0.215326	0.778217	0.999762	33.6482	17.0648	50.2104	35.422	47.1945	34.5197
hsa-miR-4525	-2.47571	-1.30784	0.19384	0.999762	1.66575	13.2366	1.60394	1.94007	1.9214	2.77672
hsa-miR-1237-5p	1.05142	0.0723332	0.931125	0.999762	7.82903	4.4122	8.99604	2.75365	13.3898	6.18451
hsa-miR-6846-5p	3.15542	1.65783	0.240863	0.999762	0.033315	0.454197	1.81316	0.312915	0.660483	6.24762
hsa-miR-6795-5p	1.03785	0.0535972	0.965613	0.999762	3.89786	0.0648853	2.92894	0.813579	2.70198	3.66022
hsa-miR-328-5p	1.28204	0.35844	0.702596	0.999762	5.26377	0.389312	11.1579	7.69771	10.6878	3.15536
hsa-miR-6835-5p	-2.84326	-1.50755	0.198525	0.999762	1.03277	9.01906	0.488157	0.500664	1.98145	1.19904
hsa-miR-6752-5p	-1.29715	-0.375346	0.732818	0.999762	7.39594	1.49236	0.906578	1.18908	1.62119	4.79615
hsa-miR-615-5p	-1.95921	-0.970272	0.211995	0.999762	17.5237	34.9083	12.0645	16.3968	4.20307	12.3059
hsa-miR-7704	-1.49968	-0.584657	0.440436	0.999762	11.2938	34.5839	7.88025	15.3328	6.66487	13.8205
hsa-miR-342-5p	-1.00819	-0.0117726	0.988724	0.999762	35.1807	38.8014	71.5499	24.8455	33.6246	85.8259
hsa-miR-4651	1.7472	0.805044	0.432453	0.999762	2.23211	0.843509	4.46315	3.6924	4.50329	4.92237
hsa-miR-6747-5p	1.59228	0.671096	0.425522	0.999762	870.555	916.57	665.219	1417.19	615.81	1871.89
hsa-miR-193b-5p	-1.15499	-0.207879	0.772601	0.999762	19.6559	20.1793	19.9447	19.2756	18.2533	14.136
hsa-miR-197-5p	-1.72053	-0.782851	0.426067	0.999762	0.19989	11.8091	9.34472	2.00266	1.86136	8.51948
hsa-miR-503-3p	-1.49661	-0.581696	0.557039	0.999762	1.89896	7.26716	37.5881	7.50996	1.80132	21.8982
hsa-miR-193a-5p	-1.54015	-0.623072	0.353161	0.999762	180.301	111.797	69.1091	83.1729	80.9392	70.5539
hsa-miR-363-5p	-1.45944	-0.545413	0.499743	0.999762	4.63079	14.8587	6.76446	8.07321	6.12448	3.72333
hsa-miR-6756-5p	1.44527	0.531335	0.616723	0.999762	2.29874	6.48853	0.767104	5.38214	8.10593	0.315536
hsa-miR-1293	-1.1141	-0.155877	0.84802	0.999762	27.9846	75.5914	20.0144	38.1131	33.1442	39.6314
hsa-miR-6772-5p	-1.8049	-0.851917	0.310819	0.999762	16.4909	13.3664	3.13815	11.0146	4.3832	2.90294
hsa-miR-4455	1.23816	0.308199	0.720212	0.999762	29.9502	158.255	32.6368	198.639	13.69	61.0879
hsa-miR-609	-1.82849	-0.870654	0.265962	0.999762	12.5931	16.1564	6.90394	8.69904	5.70417	5.11169
hsa-miR-23a-5p	-1.79259	-0.842046	0.271784	0.999762	15.6581	11.7442	15.5513	3.94273	8.28606	11.738
hsa-miR-12130	-1.52599	-0.609744	0.464014	0.999762	8.32876	20.3091	7.81051	11.8908	2.88211	9.08745
hsa-miR-629-5p	1.11195	0.153086	0.83625	0.999762	7.59583	9.79768	5.02104	8.57388	7.20527	9.21366
hsa-miR-4650-3p	1.22894	0.297412	0.774337	0.999762	16.0245	0	21.2697	9.82554	15.2512	20.7623
hsa-miR-3529-5p	1.33834	0.42045	0.603079	0.999762	2170.11	2089.57	4825.36	4517.99	3670.84	3969.89
hsa-miR-4451	1.10571	0.144969	0.865369	0.999762	24.2867	113.484	34.7289	144.692	13.3898	32.6265
hsa-miR-5681b	-2.66821	-1.41587	0.170419	0.999762	8.62859	7.78624	0.557894	3.88015	2.22162	0.252429
hsa-miR-10393-3p	-1.56989	-0.650662	0.539121	0.999762	1.39923	12.1984	0.41842	4.31823	2.88211	1.7039
hsa-miR-4281	1.11128	0.152216	0.834464	0.999762	7.19605	12.8473	7.39209	6.38347	15.1911	8.83502
hsa-miR-412-5p	-1.00299	-0.00430477	0.99517	0.999762	46.2079	53.9197	92.6104	71.4072	47.0144	73.5831
hsa-miR-9901	1.26757	0.342065	0.686133	0.999762	6.09665	5.25571	2.0921	10.4514	2.88211	3.78644
hsa-miR-601	1.00373	0.00537351	0.993904	0.999762	136.225	66.6372	329.576	139.998	141.824	252.555
hsa-miR-4527	-1.72956	-0.790405	0.533791	0.999762	2.03222	1.29771	0.906578	1.37683	0.30022	0.820395
hsa-miR-6753-3p	-2.00483	-1.00348	0.166042	0.999762	22.0546	25.3053	5.92762	15.1451	5.76421	5.67966
hsa-miR-4710	2.31669	1.21207	0.243702	0.999762	1.0994	0.259541	4.04473	4.50598	5.04369	2.90294
hsa-miR-3085-5p	1.33822	0.42032	0.587205	0.999762	8.39539	12.8473	2.37105	12.5166	9.8472	9.27677
hsa-miR-4466	1.54167	0.62449	0.416663	0.999762	9.32821	24.2022	2.71973	17.9613	15.011	22.9079
hsa-miR-8071	1.13896	0.187712	0.845921	0.999762	3.13161	0.843509	21.8276	4.31823	7.80571	17.2283
hsa-miR-6880-5p	-2.33529	-1.2236	0.164935	0.999762	44.3423	40.5533	4.39341	22.9054	9.96729	5.36412
hsa-miR-3165	-1.30974	-0.389284	0.55861	0.999762	229.474	298.667	423.86	225.925	183.374	317.43
hsa-miR-541-3p	-1.0982	-0.135136	0.831712	0.999762	203.755	165.198	182.571	86.9904	150.83	264.42
hsa-miR-92a-2-5p	-1.14927	-0.200724	0.825186	0.999762	2.89841	16.8702	1.81316	9.82554	5.70417	3.21847
hsa-miR-6769a-5p	-1.9869	-0.990519	0.291276	0.999762	3.89786	5.58014	6.20657	1.18908	3.48255	3.15536
hsa-miR-323a-5p	1.08991	0.124205	0.870139	0.999762	35.747	45.7442	94.2841	77.9785	39.3288	74.1511
hsa-miR-876-3p	1.02076	0.0296474	0.975268	0.999762	5.69687	49.7022	6.90394	50.2542	2.34171	10.9807
hsa-miR-3650	-1.31925	-0.399723	0.680875	0.999762	6.12997	5.70991	0.906578	2.5659	2.40176	4.73305
hsa-miR-4694-5p	-3.65704	-1.87068	0.215176	0.999762	0.0666301	0	1.60394	0.062583	0.180132	0.189322
hsa-miR-409-5p	-1.10627	-0.145706	0.876324	0.999762	9.46147	0.454197	14.6447	8.01063	3.90285	10.2865
hsa-miR-597-3p	1.35503	0.43833	0.638751	0.999762	2.09885	4.08778	3.62631	4.19306	6.90505	2.08254
hsa-miR-152-5p	1.01583	0.0226537	0.980341	0.999762	7.89566	5.70991	0.767104	7.0093	6.24457	1.38836
hsa-miR-380-5p	-1.38687	-0.471831	0.600084	0.999762	13.1594	0.713739	7.25262	2.9414	4.68342	7.63598
hsa-miR-656-5p	1.78526	0.836135	0.390763	0.999762	2.33205	3.56869	1.25526	6.00797	4.02294	2.77672
hsa-miR-92a-1-5p	-1.15009	-0.201748	0.783074	0.999762	19.3893	19.8549	16.7368	16.3342	14.4706	18.1749
hsa-miR-323b-5p	-1.53552	-0.618729	0.381861	0.999762	74.559	60.0189	106.837	59.141	45.8135	52.1897
hsa-miR-299-5p	1.06767	0.0944599	0.904421	0.999762	9.12832	28.9389	22.8039	35.3594	16.0918	13.4419
hsa-miR-5087	-1.47684	-0.562515	0.513162	0.999762	7.82903	6.87784	1.39473	3.3169	5.34391	2.27186
hsa-miR-30a-5p	-1.11647	-0.158946	0.848562	0.999762	3721.92	2869.42	6230.49	2035.45	4794.27	4654.48
hsa-miR-194-5p	1.72732	0.788534	0.335588	0.999762	0.966136	8.56486	10.7395	20.4647	4.62338	9.84474
hsa-miR-6832-5p	-2.04936	-1.03517	0.28094	0.999762	2.29874	6.16411	5.71841	2.31557	1.62119	2.90294
hsa-miR-4732-5p	1.26838	0.342984	0.665903	0.999762	11.4271	26.0839	14.9237	43.7455	9.8472	12.8739
hsa-miR-3935	-1.39466	-0.479913	0.729038	0.999762	2.06553	0.129771	0.767104	0.750996	0.540395	0.883502
hsa-miR-376a-2-5p	1.50407	0.588875	0.656461	0.999762	0.0666301	3.63358	0.139473	1.31424	3.36246	1.07282
hsa-miR-8065	2.05888	1.04186	0.137456	0.999762	8.4287	6.48853	15.9	24.8455	17.713	20.6992
hsa-miR-6806-5p	1.07348	0.10229	0.900546	0.999762	9.5281	3.30915	3.34736	5.50731	7.98584	4.03887
hsa-miR-6073	-1.23519	-0.304738	0.800928	0.999762	1.9989	5.06106	0.139473	2.62849	1.74127	1.45147
hsa-miR-142-3p	1.6622	0.73309	0.334044	0.999762	14.8585	10.187	26.7092	48.1264	21.3156	16.5341
hsa-miR-4703-3p	-1.77055	-0.824201	0.352479	0.999762	18.9563	201.209	11.925	65.6496	35.3058	30.1022
hsa-miR-3713	1.20259	0.266151	0.829096	0.999762	1.16603	0.843509	0.836841	0.750996	0.960702	1.83011
hsa-miR-567	-3.76537	-1.91279	0.150021	0.999762	0.13326	3.82823	2.44079	0.750996	0.540395	0.378644
hsa-miR-630	1.18097	0.239969	0.748336	0.999762	10.1611	8.37021	5.99736	7.63513	5.464	15.9661
hsa-miR-505-3p	-1.32411	-0.405026	0.594558	0.999762	21.4549	16.9351	22.7342	5.56989	23.4171	17.1652
hsa-miR-12122	-2.48677	-1.31428	0.391226	0.999762	0.19989	0.0648853	3.69605	0.187749	0.120088	1.26215
hsa-miR-6879-3p	1.27285	0.348059	0.799654	0.999762	1.96559	0.0648853	4.53289	0.125166	0.780571	7.44666
hsa-miR-668-3p	1.65861	0.729976	0.373555	0.999762	6.12997	7.5267	17.0158	5.56989	15.1911	30.0391
hsa-miR-4697-3p	1.30617	0.38534	0.621432	0.999762	5.79682	9.2786	21.6184	12.1411	15.2512	20.3837
hsa-miR-223-3p	-4.85134	-2.27838	0.123967	0.999762	2.09885	0.454197	0.20921	0.312915	0	0.252429
hsa-miR-616-3p	3.92045	1.97102	0.144629	0.999762	1.26597	0	0.278947	3.3169	1.20088	1.83011
hsa-miR-198	-1.44672	-0.532782	0.715225	0.999762	1.19934	0.0648853	0.0697367	0.062583	0.0600439	0.820395
hsa-miR-4433a-5p	-1.17549	-0.233261	0.79758	0.999762	9.12832	0.519083	10.1816	2.9414	5.16378	8.77191
hsa-miR-4449	-1.36939	-0.453531	0.577045	0.999762	11.3604	17.9732	3.69605	7.63513	5.70417	10.7913
hsa-miR-3909	1.28378	0.360395	0.651398	0.999762	11.1605	1.55725	13.4592	5.25697	12.9094	15.4613
hsa-miR-4440	1.27835	0.35428	0.650868	0.999762	3.66465	15.0534	5.09078	7.88546	15.9717	6.50005
hsa-miR-3618	1.00693	0.00995736	0.994894	0.999762	0.0999451	0.0648853	0.0697367	0	0.240176	0
hsa-miR-934	-2.24129	-1.16433	0.366003	0.999762	2.49863	6.03433	0.0697367	1.62716	0.180132	2.01943
hsa-miR-8078	1.02443	0.0348181	0.962189	0.999762	213.949	199.717	500.082	75.35	438.741	421.935
hsa-miR-4796-5p	-1.13114	-0.177774	0.886071	0.999762	4.99725	0.194656	0.41842	0.876162	1.80132	2.33497
hsa-miR-6895-3p	-1.25266	-0.324991	0.785718	0.999762	2.83178	0.194656	4.53289	1.81491	1.5011	2.71361
hsa-miR-593-3p	1.07366	0.102532	0.913946	0.999762	5.86345	0.519083	7.67104	4.4434	7.68562	2.96604
hsa-miR-346	-1.53135	-0.614805	0.435037	0.999762	26.1856	22.061	3.34736	14.9573	6.96509	11.8011
hsa-miR-200c-5p	1.45612	0.542134	0.636155	0.999762	0.932821	0.454197	2.37105	3.3169	1.68123	0.441751
hsa-miR-6740-3p	-1.01898	-0.0271284	0.976026	0.999762	2.09885	4.93128	9.06578	2.69107	4.56334	8.45638
hsa-miR-431-5p	1.25243	0.324729	0.627321	0.999762	388.22	198.29	428.393	303.403	344.052	623.689
hsa-miR-1257	-1.08416	-0.116572	0.918893	0.999762	5.06388	0.259541	1.95263	1.56458	3.18233	2.01943
hsa-miR-4504	2.19921	1.13699	0.47081	0.999762	0.0666301	0	0.767104	0.062583	0	1.767
hsa-miR-7973	-1.97587	-0.982491	0.400436	0.999762	3.26487	3.43892	0.557894	2.44074	0.420307	0.820395
hsa-miR-134-5p	1.14443	0.194633	0.790128	0.999762	51.7716	44.5113	105.163	71.3447	73.854	85.1948
hsa-miR-4316	-1.49971	-0.584685	0.492492	0.999762	6.46312	13.4961	1.325	7.32221	4.02294	2.83983
hsa-miR-1294	-1.07393	-0.102897	0.880789	0.999762	15.6247	9.60303	23.7802	16.0213	11.5284	18.0487
hsa-miR-3689a-5p	2.04878	1.03477	0.496627	0.999762	0.0666301	2.01144	0.0697367	2.5659	0	1.83011
hsa-miR-19a-3p	1.04122	0.0582776	0.934843	0.999762	44.1091	50.4159	90.6578	87.7414	50.9773	53.9567
hsa-miR-3944-5p	1.62711	0.702315	0.474072	0.999762	1.89896	5.25571	3.20789	5.56989	0.600439	10.6651
hsa-miR-143-5p	1.04672	0.0658744	0.951281	0.999762	5.16383	0.0648853	4.7421	4.63114	3.36246	2.46118
hsa-miR-1227-3p	-1.11207	-0.153242	0.849255	0.999762	24.2867	5.45037	18.3408	3.00399	13.7501	26.5051
hsa-miR-1271-3p	1.96459	0.974225	0.29703	0.999762	14.5254	0.259541	11.646	12.2037	20.475	19.3108
hsa-miR-933	-1.18235	-0.241658	0.836533	0.999762	3.03167	0.129771	1.39473	0.62583	1.5011	1.767
hsa-miR-636	-1.40563	-0.491216	0.507016	0.999762	9.36152	19.7251	19.9447	19.7137	11.6485	3.4709
hsa-miR-3190-3p	-1.00055	-0.000789958	0.999283	0.999762	10.0278	0.713739	7.32236	4.0679	7.08518	6.9418
hsa-miR-3138	2.97242	1.57164	0.270009	0.999762	0.0666301	0.129771	1.88289	4.13048	0.120088	1.89322
hsa-miR-7847-3p	1.49989	0.584861	0.496393	0.999762	2.23211	23.0992	5.02104	27.4114	9.60702	8.45638
hsa-miR-376b-5p	1.90481	0.929648	0.431116	0.999762	1.39923	0.129771	1.60394	2.44074	3.06224	0.504858
hsa-miR-3691-5p	-2.35553	-1.23605	0.195012	0.999762	2.432	10.3168	2.23158	2.69107	1.74127	1.89322
hsa-miR-8056	1.49257	0.577794	0.552486	0.999762	16.4243	0.0648853	11.4368	11.6404	17.773	12.3059
hsa-miR-3688-5p	-2.09109	-1.06425	0.407193	0.999762	0.13326	6.22899	2.23158	2.75365	1.14083	0.189322
hsa-miR-891a-3p	1.93328	0.95105	0.452623	0.999762	0.0999451	4.4122	0.488157	7.3848	1.5011	0.757287
hsa-miR-663b	-1.24191	-0.312561	0.719663	0.999762	1.89896	10.1221	6.97367	6.69638	5.04369	3.4709
hsa-miR-1233-5p	-1.23029	-0.298995	0.692717	0.999762	10.5275	9.21372	4.53289	5.88281	8.64632	5.30101
hsa-miR-4654	1.50489	0.589658	0.434717	0.999762	21.4882	19.2061	2.92894	21.5911	27.6202	16.5341
hsa-miR-491-5p	-1.22276	-0.290136	0.696034	0.999762	5.36372	18.2977	6.90394	7.50996	6.06443	11.3593
hsa-miR-3151-5p	1.95284	0.965572	0.415139	0.999762	0.832876	0.454197	1.81316	0.500664	3.18233	2.33497
hsa-miR-4447	-1.74065	-0.799627	0.355964	0.999762	5.03057	15.832	5.71841	5.31956	8.52623	1.38836
hsa-miR-6742-5p	1.14283	0.192614	0.841223	0.999762	4.96394	3.30915	0.697367	3.3169	4.26312	2.77672
hsa-miR-6793-5p	-1.30772	-0.387055	0.613246	0.999762	18.29	23.4236	16.4579	17.8987	21.1355	5.42723
hsa-miR-4536-5p	-1.06607	-0.0922996	0.884965	0.999762	150.351	191.152	286.339	139.998	195.023	253.754
hsa-miR-203a-5p	-1.17295	-0.230136	0.783477	0.999762	8.92843	11.4847	4.46315	14.2689	1.14083	5.80587
hsa-miR-3177-5p	1.04511	0.0636516	0.966386	0.999762	1.79901	0.129771	0.0697367	1.87749	0.0600439	0.189322
hsa-miR-223-5p	1.29995	0.378459	0.786983	0.999762	1.7657	0	0.557894	1.50199	1.20088	0.378644
hsa-miR-597-5p	2.05521	1.03928	0.482408	0.999762	0.033315	0.194656	1.95263	0.438081	3.30241	0.69418
hsa-miR-3657	-1.28382	-0.36044	0.750621	0.999762	3.93117	0.194656	4.53289	1.43941	3.60263	1.7039
hsa-miR-4669	-1.02066	-0.0295007	0.976801	0.999762	5.39703	7.65647	0.348684	1.12649	8.22601	3.78644
hsa-miR-4711-3p	-1.26061	-0.334117	0.743051	0.999762	9.29489	1.81679	1.39473	4.63114	0.540395	4.79615
hsa-miR-3911	-3.31064	-1.72711	0.258463	0.999762	2.53194	0	3.34736	0	0.120088	1.64079
hsa-miR-644a	-2.12425	-1.08695	0.185979	0.999762	10.994	31.7938	4.25394	6.38347	6.90505	8.83502
hsa-miR-10401-5p	1.41006	0.495756	0.662876	0.999762	1.03277	2.85495	1.67368	1.18908	3.9629	2.5874
hsa-miR-6867-5p	-1.09814	-0.135061	0.85874	0.999762	13.5925	12.1984	11.925	16.7723	9.54698	8.07773
hsa-miR-3152-3p	1.8519	0.889009	0.463653	0.999762	1.59912	0.129771	1.95263	4.13048	0.960702	1.767
hsa-miR-1258	1.61407	0.690706	0.370366	0.999762	20.4554	33.5457	9.4842	60.3926	23.3571	18.7429
hsa-miR-1206	-1.66486	-0.735404	0.478441	0.999762	3.7646	8.88929	0.767104	0.62583	4.20307	3.21847
hsa-miR-6853-3p	-1.42296	-0.508899	0.514548	0.999762	12.793	10.0572	11.8552	7.13447	11.4684	5.80587
hsa-miR-642b-5p	1.30562	0.38473	0.71797	0.999762	6.66301	0.129771	2.71973	6.94672	2.82206	2.71361
hsa-miR-4326	1.01874	0.0267834	0.973175	0.999762	12.8263	16.3511	7.53157	4.25565	19.4542	13.6943
hsa-miR-2117	-1.77974	-0.831664	0.535712	0.999762	3.66465	1.81679	2.71973	0.062583	0.0600439	4.48062
hsa-miR-2116-5p	-1.337	-0.418996	0.615148	0.999762	4.83068	26.019	4.60262	9.13712	10.2675	7.06802
hsa-miR-22-5p	1.24302	0.313852	0.662124	0.999762	57.6683	30.1068	81.1736	64.2728	70.4915	75.2239
hsa-miR-4425	1.30903	0.388502	0.641654	0.999762	24.32	36.0762	40.3078	64.8986	20.8953	45.9421
hsa-miR-3147	1.12935	0.175487	0.846866	0.999762	9.16163	1.03817	5.78815	12.9547	3.06224	2.08254
hsa-miR-3613-5p	-1.00064	-0.000928586	0.998881	0.999762	210.118	70.5952	455.66	245.138	208.953	281.774
hsa-miR-5705	1.17342	0.230722	0.837592	0.999762	2.36537	0.583968	4.1842	3.94273	3.72272	0.69418
hsa-miR-6740-5p	1.45241	0.538451	0.514531	0.999762	6.8629	5.90456	1.95263	12.7669	3.72272	4.98548
hsa-miR-8068	-1.70289	-0.767984	0.410641	0.999762	23.3538	9.34349	0.627631	8.57388	4.20307	6.81559
hsa-miR-2052	-1.79548	-0.844372	0.51876	0.999762	0.932821	7.33204	0.139473	2.25299	2.28167	0.126215
hsa-miR-19a-5p	3.48096	1.79948	0.218502	0.999762	0.666301	0.0648853	0.488157	0.438081	3.78277	0.126215
hsa-miR-9-3p	-1.77203	-0.825406	0.390444	0.999762	5.19714	6.03433	3.27763	2.50332	0.960702	4.73305
hsa-miR-3143	-1.01057	-0.0151635	0.98871	0.999762	4.96394	0.389312	4.53289	3.75498	5.22382	0.820395
hsa-miR-4764-3p	1.67048	0.740261	0.592017	0.999762	1.69907	0	1.04605	1.00133	1.32097	2.33497
hsa-miR-208a-3p	1.31195	0.391713	0.756373	0.999762	4.39758	0.259541	0.20921	3.19173	1.20088	2.08254
hsa-miR-499a-5p	1.76835	0.822405	0.28127	0.999762	3.29819	7.13739	8.85657	8.63646	7.50549	17.7963
hsa-miR-6792-5p	-1.78336	-0.834598	0.264933	0.999762	98.346	90.6448	42.7486	52.8827	53.6792	23.4128
hsa-miR-374c-5p	-2.00762	-1.00548	0.20261	0.999762	10.7941	51.2594	7.94999	12.2663	10.3276	12.2428
hsa-miR-633	-1.1789	-0.237437	0.848507	0.999762	2.53194	3.76335	0.278947	2.37816	0.240176	2.96604
hsa-miR-889-3p	1.29095	0.368436	0.561693	0.999762	119.468	176.099	297.497	349.151	183.614	232.677
hsa-miR-155-5p	1.03193	0.0453494	0.955535	0.999762	2071.26	865.181	2397.55	1059.78	2247.92	2196.64
hsa-miR-4775	1.26295	0.336797	0.677054	0.999762	29.2839	4.34732	59.1368	23.8441	42.6912	50.612
hsa-miR-520d-5p	1.63657	0.710679	0.555054	0.999762	1.23266	0.324427	1.81316	0.312915	3.0022	2.20875
hsa-miR-3941	1.36051	0.444152	0.619067	0.999762	3.89786	3.56869	3.62631	4.4434	5.464	5.36412
hsa-miR-466	2.6328	1.3966	0.243576	0.999762	2.26542	0.0648853	1.81316	2.25299	2.58189	6.18451
hsa-miR-7151-3p	-2.54328	-1.34669	0.338024	0.999762	3.03167	0.0648853	2.02237	0.062583	0.240176	1.7039
hsa-miR-582-5p	1.17834	0.23675	0.793857	0.999762	6.76295	3.24427	47.9789	27.912	32.5438	7.8253
hsa-miR-4666a-5p	2.799	1.48491	0.283423	0.999762	2.26542	0	0.41842	2.75365	4.80351	0.0631073
hsa-miR-5591-3p	-1.08567	-0.118582	0.914989	0.999762	2.49863	3.1145	1.88289	1.25166	1.56114	4.10197
hsa-miR-6798-3p	-1.09999	-0.137494	0.88511	0.999762	7.5292	1.7519	2.58026	3.00399	2.4618	5.42723
hsa-miR-7848-3p	1.89336	0.920947	0.302128	0.999762	6.16328	0.454197	6.55525	7.82288	5.94435	11.2331
hsa-miR-4777-3p	3.4354	1.78048	0.173905	0.999762	1.39923	0.0648853	0.278947	2.69107	1.02075	2.5874
hsa-miR-4724-3p	-1.45265	-0.53869	0.648062	0.999762	2.79846	2.91984	0.20921	1.31424	1.02075	1.767
hsa-miR-4788	-2.48565	-1.31362	0.180461	0.999762	3.06498	9.34349	3.20789	1.12649	0.780571	4.3544
hsa-miR-4693-5p	1.67118	0.740866	0.5422	0.999762	2.6652	0.194656	0.20921	2.31557	1.38101	1.57768
hsa-miR-3682-5p	-1.01879	-0.0268606	0.983793	0.999762	1.83233	0.259541	1.60394	0.187749	1.44105	2.01943
hsa-miR-5687	-1.83197	-0.873396	0.496298	0.999762	3.73128	3.958	0.0697367	0.250332	1.08079	2.90294
hsa-miR-3684	-1.14607	-0.196701	0.86936	0.999762	1.3326	4.60686	0.348684	1.81491	1.38101	2.27186
hsa-miR-151a-3p	1.30784	0.387187	0.575361	0.999762	100.811	45.1602	188.08	157.647	165.661	113.53
hsa-miR-877-5p	-1.13917	-0.18798	0.817182	0.999762	29.2839	37.6335	7.18288	27.7869	14.8909	22.4031
hsa-miR-6866-5p	1.01788	0.0255744	0.986757	0.999762	0.13326	0.0648853	3.13815	3.00399	0.180132	0.189322
hsa-miR-376a-5p	1.15983	0.213913	0.852812	0.999762	1.06608	1.68702	5.85789	0.062583	3.90285	5.99519
hsa-miR-4766-3p	2.16919	1.11715	0.440016	0.999762	1.06608	0.0648853	0.139473	1.50199	1.26092	0.126215
hsa-miR-585-5p	-3.05564	-1.61148	0.228195	0.999762	1.19934	3.43892	0.557894	1.18908	0.240176	0.252429
hsa-miR-5682	1.48332	0.568833	0.509527	0.999762	617.761	412.8	1813.02	1304.79	1449.52	1463.52
hsa-miR-4524a-5p	-2.00552	-1.00397	0.232271	0.999762	31.616	82.3395	9.90262	22.5925	10.6278	28.5245
hsa-miR-4662a-5p	1.33227	0.413887	0.602385	0.999762	9.06169	4.54197	2.78947	7.7603	6.845	7.50977
hsa-miR-4321	1.26483	0.338943	0.646147	0.999762	27.8181	39.4503	16.8763	39.1144	36.867	30.4808
hsa-miR-5579-3p	1.14006	0.18911	0.79873	0.999762	118.801	58.9808	332.435	71.0317	242.397	268.206
hsa-miR-4423-3p	-2.69437	-1.42995	0.324733	0.999762	0.033315	6.81296	0.278947	2.31557	0.120088	0.189322
hsa-miR-5704	1.04352	0.0614623	0.951617	0.999762	2.99835	2.14122	2.92894	1.62716	1.26092	5.55344
hsa-miR-1295a	1.98349	0.988044	0.389378	0.999762	0.499725	2.46564	1.18552	2.81624	1.44105	3.84954
hsa-miR-12116	-1.47486	-0.560581	0.617981	0.999762	1.89896	2.98472	2.71973	2.87882	0.840615	1.38836
hsa-miR-3162-5p	-1.13705	-0.185302	0.876751	0.999762	5.23046	0.129771	1.53421	2.75365	1.02075	2.33497
hsa-miR-1296-5p	1.48347	0.568974	0.451213	0.999762	11.4937	16.6106	24.4079	35.7349	27.7403	14.2622
hsa-miR-6824-5p	1.24672	0.31814	0.805765	0.999762	3.46476	0.389312	0.278947	0.563247	3.9629	0.69418
hsa-miR-4278	-3.01522	-1.59226	0.274203	0.999762	2.16548	0.194656	0.0697367	0.312915	0.120088	0.378644
hsa-miR-331-5p	1.38514	0.47003	0.741599	0.999762	1.46586	0	1.60394	2.9414	1.20088	0.126215
hsa-miR-6800-5p	1.19413	0.255965	0.785449	0.999762	4.39758	4.28243	1.81316	6.44605	4.56334	1.57768
hsa-miR-6802-5p	-1.40471	-0.49027	0.56093	0.999762	8.79517	11.0305	2.37105	6.6338	1.80132	7.38355
hsa-miR-4540	1.08271	0.114648	0.893329	0.999762	5.7635	8.04578	1.53421	8.57388	2.64193	5.42723
hsa-miR-4474-5p	1.0229	0.0326628	0.981121	0.999762	1.29929	0.0648853	0.139473	0.500664	1.02075	0.0631073
hsa-miR-3606-5p	-1.0407	-0.0575591	0.962246	0.999762	2.33205	0.129771	3.55657	1.75232	1.38101	2.65051
hsa-miR-921	-2.06475	-1.04597	0.22075	0.999762	15.3249	28.6144	1.60394	7.32221	9.48694	5.2379
hsa-miR-4671-3p	-1.09849	-0.135527	0.90725	0.999762	0.39978	4.67174	1.25526	2.06524	1.62119	2.01943
hsa-miR-4473	-1.26412	-0.338133	0.726905	0.999762	3.96449	3.43892	6.27631	7.0093	1.08079	2.71361
hsa-miR-4727-3p	1.18441	0.244165	0.754684	0.999762	6.96284	4.80151	3.76578	8.26096	5.464	4.92237
hsa-miR-4460	1.10504	0.144099	0.860486	0.999762	37.3128	26.2786	46.3052	17.5232	65.0275	38.8741
hsa-miR-340-5p	1.3713	0.455547	0.551977	0.999762	17.7236	4.8664	29.9868	12.0785	34.7654	25.2429
hsa-miR-374a-5p	1.54745	0.629892	0.419139	0.999762	31.3494	24.2671	110.602	122.725	91.8071	42.5974
hsa-let-7a-3p	1.01439	0.0206108	0.980486	0.999762	1171.12	489.3	3431.47	1153.15	1321.51	2690.45
hsa-miR-4789-5p	-1.52763	-0.611292	0.641294	0.999762	2.59857	0.129771	1.74342	1.00133	1.62119	0.315536
hsa-let-7f-2-3p	1.11433	0.156183	0.831607	0.999762	18.5232	5.90456	35.3565	24.0319	16.7522	25.8109
hsa-miR-3144-3p	2.57322	1.36357	0.336131	0.999762	0.0666301	0	1.04605	1.06391	1.5011	0.252429
hsa-let-7d-3p	1.33101	0.41252	0.610921	0.999762	185.931	33.0915	314.443	46.4992	160.017	503.533
hsa-let-7e-3p	1.23871	0.308833	0.66586	0.999762	209.585	123.347	469.328	212.907	246.54	534.266
hsa-miR-190a-3p	1.37916	0.463786	0.751189	0.999762	1.49918	0.0648853	0.20921	0.876162	0.0600439	1.57768
hsa-miR-361-5p	1.46001	0.545983	0.42193	0.999762	108.107	50.1564	135.498	95.6269	142.965	190.332
hsa-miR-9903	-2.31139	-1.20876	0.290245	0.999762	1.79901	1.88167	3.06842	0.62583	1.32097	0.883502
hsa-miR-4633-5p	-2.03399	-1.02431	0.291953	0.999762	7.02947	6.94273	1.95263	5.31956	1.38101	1.13593
hsa-miR-3115	-1.04377	-0.0618089	0.956937	0.999762	8.66191	0.0648853	0.697367	3.37948	1.02075	4.66994
hsa-miR-584-5p	1.18461	0.244413	0.714593	0.999762	116.336	127.5	52.3723	117.656	125.071	108.292
hsa-miR-3924	1.11592	0.158238	0.918583	0.999762	2.56526	0	0.488157	0.062583	3.30241	0.0631073
hsa-miR-4477a	-1.02894	-0.0411613	0.974009	0.999762	5.03057	0	1.74342	2.62849	3.72272	0.252429
hsa-miR-556-3p	1.18873	0.249425	0.764628	0.999762	11.7602	13.2366	1.53421	7.69771	12.9094	10.9807
hsa-miR-4795-3p	-2.40248	-1.26452	0.188867	0.999762	5.93008	14.7939	0.627631	1.25166	2.76202	4.85926
hsa-miR-12123	2.60297	1.38016	0.251752	0.999762	0.53304	0	4.39341	7.7603	1.38101	3.66022
hsa-miR-137-3p	1.2005	0.263635	0.73115	0.999762	38.5455	9.40837	46.7236	21.5911	35.4859	56.6072
hsa-miR-5701	1.60553	0.683051	0.374464	0.999762	8.56196	11.4198	9.62367	11.0146	11.4083	25.0536
hsa-miR-6715b-3p	1.24156	0.312156	0.753776	0.999762	4.16438	4.54197	0.348684	2.5659	6.00439	2.71361
hsa-miR-3671	1.56899	0.649838	0.535366	0.999762	2.83178	0.389312	3.06842	2.9414	2.82206	4.16508
hsa-miR-7159-5p	-1.24648	-0.317855	0.699154	0.999762	6.39649	9.53814	1.88289	7.07188	4.14303	3.09226
hsa-miR-421	-1.12258	-0.166822	0.843702	0.999762	2.26542	4.34732	17.2947	9.38746	6.72492	5.11169
hsa-miR-95-3p	1.16833	0.224444	0.847271	0.999762	1.29929	0.324427	2.92894	1.18908	2.58189	1.51457
hsa-miR-520e-5p	-2.20489	-1.1407	0.341121	0.999762	1.39923	5.19083	3.97499	0.125166	4.32316	0.315536
hsa-miR-561-5p	-1.21324	-0.278861	0.698461	0.999762	13.3593	4.73663	8.43814	10.3888	5.40395	6.18451
hsa-miR-1297	1.47257	0.558332	0.534182	0.999762	9726.29	5140.54	23864.9	21403.7	13469.6	22161.6
hsa-miR-513b-5p	1.20604	0.27028	0.782688	0.999762	1.9989	3.24427	2.37105	5.56989	1.68123	1.89322
hsa-miR-377-3p	1.12447	0.169241	0.824166	0.999762	21.5881	24.6564	51.1868	44.872	47.6148	16.9759
hsa-miR-513a-5p	1.17218	0.229199	0.765292	0.999762	11.8935	14.2099	43.5855	30.6657	21.5558	29.3449
hsa-miR-27a-3p	1.45215	0.538192	0.553639	0.999762	11878.1	11569.5	30349.8	34707	18477.8	24937
hsa-miR-23a-3p	1.60899	0.686159	0.425201	0.999762	4752.92	2390.83	10855.2	11908.6	6532.9	10518.7
hsa-miR-197-3p	-1.05165	-0.0726534	0.917166	0.999762	311.795	145.408	470.305	131.424	274.881	475.64
hsa-miR-6802-3p	-1.43037	-0.516391	0.643238	0.999762	1.53249	8.37021	0.697367	1.31424	2.22162	3.84954
hsa-miR-6794-3p	-1.21598	-0.282115	0.817949	0.999762	2.99835	0.194656	0.767104	0.938746	1.9214	0.441751
hsa-miR-181b-2-3p	1.60109	0.679053	0.441306	0.999762	3.0983	6.87784	0.767104	7.57255	6.60483	3.02915
hsa-miR-653-3p	-1.00853	-0.0122603	0.987963	0.999762	4.73073	7.13739	2.58026	4.0679	6.72492	3.53401
hsa-miR-5100	-1.75065	-0.807893	0.291405	0.999762	17.2905	40.8129	11.0184	19.0252	12.6693	7.7622
hsa-miR-4291	-1.61796	-0.694175	0.47593	0.999762	3.96449	3.04961	2.37105	2.25299	1.44105	2.27186
hsa-miR-3157-5p	1.01695	0.0242474	0.974813	0.999762	19.8224	47.1067	35.0776	46.8121	12.249	44.6168
hsa-miR-12128	1.07553	0.105054	0.940828	0.999762	3.03167	0	0.278947	2.62849	0.840615	0.126215
hsa-miR-3127-5p	1.00944	0.0135577	0.991145	0.999762	0.499725	3.37404	1.18552	2.9414	0.30022	1.83011
hsa-miR-11399	1.55399	0.635978	0.347299	0.999762	54.9365	67.9349	61.2986	125.041	58.6629	102.423
hsa-miR-222-5p	-1.24413	-0.315139	0.693664	0.999762	6.06334	19.4656	6.62499	11.5779	4.50329	9.71852
hsa-miR-4276	-1.59672	-0.675113	0.430382	0.999762	2.26542	12.2633	13.5289	5.75764	8.46619	3.28158
hsa-miR-485-3p	1.37599	0.460473	0.541458	0.999762	65.3641	31.4045	105.86	48.7522	70.0112	160.04
hsa-miR-376a-3p	1.25287	0.325236	0.706147	0.999762	990.889	402.224	2079.83	1313.62	1448.56	1588.92
hsa-miR-5007-3p	-1.00911	-0.01308	0.989243	0.999762	6.66301	10.6412	5.02104	20.6524	0.900659	0.567966
hsa-miR-452-3p	2.34399	1.22897	0.294948	0.999762	1.23266	2.59541	0.278947	6.13314	1.44105	2.08254
hsa-miR-7154-5p	2.0893	1.06302	0.375231	0.999762	1.56581	0.129771	1.18552	0.312915	4.3832	1.38836
hsa-miR-433-3p	1.06202	0.0868123	0.905215	0.999762	27.2184	16.6106	13.5289	17.0226	16.1518	27.9565
hsa-miR-6516-3p	1.47146	0.557247	0.447733	0.999762	11.4271	3.69846	26.5	15.7083	14.7108	30.7964
hsa-miR-1298-5p	-1.60369	-0.681399	0.643257	0.999762	2.46531	0	0.836841	1.75232	0.0600439	0.252429
hsa-miR-1912-5p	-1.66511	-0.735615	0.472846	0.999762	1.59912	8.04578	3.20789	5.88281	0.360263	1.45147
hsa-miR-5696	-1.12259	-0.166835	0.874127	0.999762	5.66356	0.129771	5.85789	2.50332	5.04369	2.83983
hsa-miR-579-3p	-1.4805	-0.566085	0.474214	0.999762	4.06443	6.68319	12.2039	7.3848	4.68342	3.34469
hsa-miR-6509-3p	-1.2579	-0.331018	0.721845	0.999762	4.36427	3.69846	8.9263	0.938746	6.66487	5.86898
hsa-miR-4436b-5p	-2.6433	-1.40234	0.131648	0.999762	5.36372	9.01906	4.32368	0.563247	2.58189	3.91265
hsa-miR-6512-3p	1.47179	0.557573	0.505367	0.999762	4.69742	5.19083	9.34472	3.19173	15.011	10.0341
hsa-miR-145-5p	-1.04571	-0.0644868	0.921919	0.999762	98.8457	151.248	242.475	159.274	119.247	192.351
hsa-miR-5581-3p	-1.00617	-0.00886804	0.990703	0.999762	16.5576	18.8816	58.2999	31.1664	25.0383	36.8547
hsa-miR-188-3p	-1.22229	-0.289584	0.790265	0.999762	5.19714	0.324427	2.16184	2.12782	2.94215	1.26215
hsa-miR-1260a	1.09649	0.132893	0.875154	0.999762	3496.75	3080.11	2446.71	1367.31	2083.46	6443.51
hsa-miR-3156-3p	1.18404	0.243716	0.783598	0.999762	623.991	903.528	769.266	194.508	1791.83	733.117
hsa-miR-7977	1.29545	0.373451	0.568717	0.999762	215.981	281.732	78.1749	125.416	260.951	359.712
hsa-miR-2355-5p	-1.19817	-0.260827	0.742325	0.999762	8.59528	8.75952	4.39341	3.94273	4.86356	9.40299
hsa-miR-6763-3p	-1.18286	-0.242277	0.733347	0.999762	36.5799	39.3854	24.6171	15.6458	27.1398	42.2819
hsa-miR-6826-3p	1.22032	0.287261	0.782363	0.999762	13.0262	0.324427	5.29999	0.563247	9.48694	12.7477
hsa-miR-6883-3p	-1.85009	-0.887597	0.40534	0.999762	2.83178	6.22899	0.906578	3.3169	1.74127	0.315536
hsa-miR-642a-5p	1.93356	0.951262	0.274287	0.999762	6.66301	0.324427	3.4171	4.56856	10.928	4.73305
hsa-miR-670-5p	-1.57401	-0.654448	0.37797	0.999762	27.2517	21.0228	14.9934	8.38613	12.1289	19.7526
hsa-miR-623	1.02229	0.0318027	0.968199	0.999762	5.49698	16.5458	7.18288	12.5792	4.74347	12.4952
hsa-miR-204-5p	-1.52301	-0.606923	0.392326	0.999762	51.2052	28.8091	19.7355	20.8402	22.2763	22.5293
hsa-miR-6084	2.28941	1.19497	0.354712	0.999762	0.233205	0.324427	1.67368	1.62716	2.40176	0.946609
hsa-miR-937-3p	1.47043	0.556233	0.449843	0.999762	6.1966	9.40837	4.60262	8.19838	11.9487	9.5292
hsa-miR-572	1.69459	0.760934	0.529847	0.999762	0.699616	1.23282	2.71973	1.00133	1.08079	5.74276
hsa-miR-4497	-1.33542	-0.417294	0.645325	0.999762	4.13106	12.6526	1.88289	8.07321	4.62338	1.26215
hsa-miR-1468-5p	2.16081	1.11157	0.135047	0.999762	14.3921	11.2252	40.796	37.6124	43.8921	61.8451
hsa-miR-155-3p	-1.98222	-0.987114	0.399611	0.999762	2.89841	0.259541	2.30131	0.438081	1.56114	0.757287
hsa-miR-5571-3p	1.83952	0.879328	0.300557	0.999762	3.06498	4.47709	4.67236	13.8934	6.06443	2.46118
hsa-miR-7975	1.06671	0.0931665	0.921276	0.999762	4.29764	3.63358	1.74342	5.75764	1.02075	3.59712
hsa-miR-337-3p	1.41665	0.502487	0.546773	0.999762	2167.81	1241.32	4782.41	2914.37	3204.72	5485.41
hsa-miR-4691-5p	-1.23675	-0.306557	0.675788	0.999762	8.46202	13.6259	5.43947	5.25697	5.76421	11.2331
hsa-miR-6749-3p	1.0377	0.0533857	0.943981	0.999762	33.7148	46.5228	13.8776	11.4527	42.8713	43.3547
hsa-miR-7111-3p	-1.18413	-0.243822	0.787043	0.999762	3.56471	8.69463	2.37105	4.31823	5.28386	2.71361
hsa-miR-6780a-3p	-1.19935	-0.262255	0.727513	0.999762	47.8071	16.8702	25.1052	16.1464	40.0493	18.7429
hsa-miR-6881-3p	-1.06969	-0.0971946	0.906656	0.999762	2.39868	10.3168	3.83552	3.25432	6.90505	5.2379
hsa-miR-378a-5p	1.44571	0.531782	0.515395	0.999762	6.56306	2.14122	11.8552	7.32221	9.12667	13.2525
hsa-miR-1200	-1.25681	-0.329768	0.675956	0.999762	21.3549	40.4236	14.2263	25.7216	13.0896	21.6458
hsa-miR-1343-3p	-1.03229	-0.0458529	0.95405	0.999762	15.1583	8.49998	5.16052	4.56856	11.5284	11.9273
hsa-miR-6868-3p	1.34877	0.43165	0.547056	0.999762	10.7608	9.34349	9.4842	13.6431	15.4313	11.17
hsa-miR-502-5p	1.18221	0.241485	0.811534	0.999762	2.79846	1.7519	2.44079	3.75498	1.74127	2.90294
hsa-miR-4444	-2.54453	-1.3474	0.211203	0.999762	7.66246	4.08778	0.278947	2.19041	0.840615	1.7039
hsa-miR-6788-3p	-1.30106	-0.379685	0.750396	0.999762	1.3326	4.08778	0.557894	0.688413	1.80132	2.08254
hsa-miR-6726-3p	-1.73187	-0.792334	0.534085	0.999762	0.33315	6.87784	0.41842	1.94007	0.360263	2.08254
hsa-miR-3124-5p	-1.78174	-0.833286	0.286748	0.999762	6.79627	15.7022	5.92762	4.94406	5.40395	5.55344
hsa-miR-639	-1.06039	-0.0845964	0.903368	0.999762	25.0196	20.5686	10.6	15.0199	20.7151	17.4176
hsa-miR-4790-5p	1.59342	0.672124	0.551308	0.999762	3.86454	0.0648853	3.69605	2.50332	4.32316	5.36412
hsa-miR-4665-3p	1.40331	0.488838	0.50143	0.999762	93.2488	299.056	72.1775	436.704	94.9294	120.156
hsa-miR-1469	-1.01874	-0.0267927	0.976034	0.999762	13.0595	1.68702	1.88289	2.5659	8.3461	5.49033
hsa-miR-425-3p	1.40758	0.493213	0.537602	0.999762	26.1856	23.6831	39.9591	51.631	33.8047	40.8304
hsa-miR-6771-5p	-1.02103	-0.0300213	0.976345	0.999762	4.06443	4.99617	0.41842	3.94273	3.66268	1.7039
hsa-miR-3181	1.32921	0.410567	0.634026	0.999762	22.5543	70.725	5.64868	52.382	32.844	46.2576
hsa-miR-4750-5p	1.07408	0.103108	0.893076	0.999762	6.76295	12.1984	5.16052	3.25432	9.00659	13.6312
hsa-miR-3944-3p	-2.60853	-1.38324	0.250265	0.999762	4.83068	3.37404	0.976314	0.500664	0.180132	2.83983
hsa-miR-6727-5p	-1.10333	-0.141863	0.865612	0.999762	4.4309	25.4999	8.22893	6.2583	18.6136	9.65541
hsa-miR-4798-5p	-1.23053	-0.299276	0.770018	0.999762	1.46586	5.70991	2.02237	3.94273	0.720527	2.77672
hsa-miR-517a-3p	1.33097	0.412477	0.754161	0.999762	0.0999451	0.324427	0.278947	0.375498	0.180132	0.252429
hsa-miR-3677-3p	1.7963	0.84503	0.274381	0.999762	8.59528	32.0533	8.99604	26.5978	40.6497	21.8351
hsa-miR-4799-5p	2.36013	1.23887	0.417527	0.999762	0.033315	0	1.39473	2.25299	0.900659	0.189322
hsa-miR-518d-5p	-1.01361	-0.0194991	0.980574	0.999762	14.8585	34.0648	3.90526	28.2249	17.8931	5.99519
hsa-miR-1287-3p	1.69897	0.764661	0.403925	0.999762	1.79901	4.93128	3.27763	9.76295	4.68342	2.46118
hsa-miR-513c-5p	2.34543	1.22985	0.241092	0.999762	2.39868	2.40076	0.627631	6.82155	3.36246	2.71361
hsa-miR-1229-3p	1.5909	0.669843	0.362342	0.999762	16.5243	4.15266	13.5289	13.0799	11.5284	29.9129
hsa-miR-515-5p	1.25604	0.328886	0.657339	0.999762	25.6193	43.6029	9.76314	32.2303	38.8484	28.1458
hsa-miR-4713-5p	1.23334	0.302575	0.717255	0.999762	2.46531	9.60303	8.57762	13.5805	3.90285	7.88841
hsa-miR-6867-3p	1.29318	0.370928	0.646305	0.999762	5.39703	4.28243	5.09078	5.63247	6.48474	7.38355
hsa-miR-4279	1.71612	0.779153	0.243904	0.999762	12.16	14.0801	8.50788	14.2689	19.094	26.3788
hsa-miR-516a-5p	1.29344	0.371218	0.80568	0.999762	0.033315	2.40076	0.20921	0.688413	2.58189	0.126215
hsa-miR-10399-3p	-2.49657	-1.31995	0.174736	0.999762	7.22936	34.0648	3.76578	13.0173	4.44325	0.567966
hsa-miR-4684-5p	2.2815	1.18998	0.331756	0.999762	2.03222	0.129771	0.488157	3.12915	2.28167	0.820395
hsa-miR-6873-3p	1.2959	0.37395	0.662835	0.999762	13.5259	2.85495	10.9487	2.69107	19.5143	13.2525
hsa-miR-3191-5p	2.3416	1.22749	0.135108	0.999762	21.3216	67.8052	19.596	191.316	31.8833	31.3643
hsa-miR-4753-3p	1.36747	0.451511	0.691055	0.999762	1.7657	2.72518	0.627631	2.06524	2.64193	2.33497
hsa-miR-11181-5p	1.37774	0.462302	0.654896	0.999762	1.26597	1.23282	5.99736	2.5659	4.62338	4.41751
hsa-miR-4303	1.06563	0.0917056	0.929778	0.999762	1.96559	56.7098	2.92894	54.3847	7.20527	4.03887
hsa-miR-12119	-1.00016	-0.000235691	0.999762	0.999762	4.93062	16.2213	3.4171	5.13181	9.54698	9.84474
hsa-miR-3192-3p	-1.12795	-0.173705	0.838561	0.999762	31.3494	140.542	14.575	95.5643	53.319	16.4079
hsa-miR-4727-5p	-1.4666	-0.552474	0.459911	0.999762	13.2594	16.1564	9.13551	13.2676	5.464	7.57287
hsa-miR-6828-3p	1.05014	0.0705842	0.94656	0.999762	2.13216	4.60686	1.39473	5.19439	2.70198	0.631073
hsa-miR-6071	1.2125	0.27799	0.786341	0.999762	4.23101	0.259541	5.85789	1.81491	4.68342	6.0583
hsa-miR-1299	1.7683	0.822364	0.486494	0.999762	0	4.08778	2.58026	6.57122	3.4225	1.767
hsa-miR-516b-5p	-3.663	-1.87302	0.12442	0.999762	0.0666301	10.4465	1.325	1.50199	1.20088	0.504858
hsa-miR-4782-5p	-1.23287	-0.302019	0.735433	0.999762	4.13106	3.50381	5.92762	3.81757	4.08299	2.96604
hsa-miR-4314	-1.24546	-0.316679	0.778381	0.999762	3.83123	1.36259	1.81316	1.37683	3.24237	1.07282
hsa-miR-3686	3.16198	1.66083	0.230771	0.999762	1.19934	0	0.348684	4.00531	0.780571	0.252429
hsa-miR-6888-3p	1.48749	0.572877	0.421244	0.999762	17.3571	6.29388	8.43814	14.2689	18.1933	15.5875
hsa-miR-526b-5p	1.09451	0.130281	0.914969	0.999762	2.63189	0	7.25262	6.6338	2.28167	1.89322
hsa-miR-6844	-1.31762	-0.397929	0.643476	0.999762	8.29544	12.2633	1.95263	3.37948	4.50329	9.21366
hsa-miR-488-3p	-1.11529	-0.157416	0.875771	0.999762	4.36427	3.89312	4.39341	7.07188	0.360263	3.91265
hsa-miR-203a-3p	-1.04405	-0.0621917	0.957485	0.999762	1.7657	0.324427	6.55525	2.87882	1.02075	4.3544
hsa-miR-7158-3p	1.2856	0.362446	0.654019	0.999762	6.82958	35.9465	10.6	33.4819	13.9302	21.1409
hsa-miR-203b-3p	-1.91773	-0.939396	0.327669	0.999762	2.33205	8.37021	4.04473	4.13048	1.68123	1.83011
hsa-miR-4709-3p	-1.22899	-0.297474	0.718971	0.999762	20.8219	32.0533	3.06842	12.2037	14.7108	18.6166
hsa-miR-7843-3p	-2.07903	-1.05591	0.188357	0.999762	23.3205	17.8435	3.83552	8.57388	5.464	7.63598
hsa-miR-127-5p	-2.17191	-1.11896	0.171655	0.999762	8.79517	14.145	4.95131	4.31823	2.4618	6.0583
hsa-miR-6126	1.34316	0.425636	0.607435	0.999762	3.13161	19.2709	5.09078	17.2103	11.9487	7.69909
hsa-miR-6864-5p	1.14153	0.190973	0.848991	0.999762	1.96559	4.47709	1.60394	1.68974	4.9236	2.52429
hsa-miR-3616-5p	1.09481	0.130679	0.881143	0.999762	4.36427	4.15266	5.09078	9.13712	3.54259	2.20875
hsa-miR-5585-3p	1.35962	0.443205	0.640577	0.999762	1.43255	3.76335	3.90526	4.38081	5.76421	2.08254
hsa-miR-183-3p	-1.35719	-0.440624	0.78007	0.999762	0.0999451	0	3.4171	1.56458	0.0600439	0.946609
hsa-miR-4452	-2.13284	-1.09277	0.31428	0.999762	5.49698	1.88167	1.46447	1.12649	1.5011	1.57768
hsa-miR-489-3p	1.15989	0.213983	0.865072	0.999762	1.59912	0.0648853	4.53289	3.25432	1.14083	2.77672
hsa-miR-192-5p	1.59198	0.67082	0.375771	0.999762	20.9885	14.3397	40.796	45.3727	31.403	44.3013
hsa-miR-3136-5p	-1.17262	-0.229738	0.754203	0.999762	18.9563	39.2556	33.7526	25.221	26.8396	26.1264
hsa-miR-943	-1.23009	-0.298764	0.758642	0.999762	0.166575	11.874	5.29999	8.44871	2.4618	3.15536
hsa-miR-580-3p	-1.07847	-0.108983	0.91015	0.999762	3.63134	5.64502	1.74342	6.44605	1.38101	2.39808
hsa-miR-3672	-1.54984	-0.632122	0.59464	0.999762	5.39703	2.14122	2.92894	0.187749	6.18452	0.378644
hsa-miR-6807-5p	-1.72783	-0.788958	0.391898	0.999762	8.29544	4.28243	3.34736	2.37816	3.66268	3.28158
hsa-miR-5708	1.35615	0.439518	0.77073	0.999762	2.29874	0	0.348684	3.37948	0.0600439	0.189322
hsa-miR-3915	-2.40036	-1.26325	0.223377	0.999762	3.9978	7.72135	5.43947	0.62583	6.24457	0.252429
hsa-miR-1224-5p	1.62793	0.703038	0.579957	0.999762	0.966136	1.94656	0.627631	4.4434	1.26092	0.0631073
hsa-miR-4689	1.44474	0.530815	0.569945	0.999762	2.76515	4.60686	2.23158	3.56723	7.68562	2.5874
hsa-miR-6765-5p	-2.0838	-1.05922	0.281674	0.999762	4.29764	4.4122	1.325	1.62716	1.20088	2.01943
hsa-miR-6834-5p	1.13704	0.185283	0.885577	0.999762	2.16548	0.194656	0.41842	0.500664	2.04149	0.69418
hsa-miR-6869-5p	-1.61109	-0.688033	0.440213	0.999762	1.49918	12.7175	6.0671	7.57255	1.32097	3.66022
hsa-miR-937-5p	1.26116	0.33475	0.803282	0.999762	3.13161	0	0.41842	0.876162	0.240176	3.40779
hsa-miR-627-5p	1.52711	0.610801	0.530998	0.999762	2.39868	3.24427	2.58026	2.31557	4.9236	5.2379
hsa-miR-4658	-1.33131	-0.412842	0.571555	0.999762	20.7886	33.2862	36.1934	23.2183	18.0732	26.3157
hsa-miR-640	1.52289	0.606816	0.55501	0.999762	2.6652	0.324427	7.25262	8.26096	5.04369	2.27186
hsa-miR-10395-5p	-1.17961	-0.238311	0.81848	0.999762	0.666301	6.87784	4.53289	3.56723	6.12448	0.504858
hsa-miR-548aw	1.56204	0.643429	0.6005	0.999762	1.13271	0.0648853	4.1842	2.25299	3.66268	2.46118
hsa-miR-518a-5p	-2.75228	-1.46063	0.140556	0.999762	1.0994	10.9007	2.99868	1.81491	2.4618	1.13593
hsa-miR-106a-3p	2.2166	1.14835	0.258687	0.999762	2.09885	5.19083	0.20921	10.2636	3.60263	2.77672
hsa-miR-500a-3p	2.12479	1.08732	0.281371	0.999762	5.06388	0.259541	1.53421	3.62982	5.8843	5.2379
hsa-miR-7703	-1.24817	-0.31981	0.767306	0.999762	13.959	0	1.25526	2.81624	2.64193	6.75248
hsa-miR-1273h-3p	-2.24334	-1.16565	0.334304	0.999762	3.16493	2.6603	3.27763	3.37948	0.540395	0.126215
hsa-miR-3678-3p	3.79849	1.92542	0.150033	0.999762	0.233205	0	2.92894	6.38347	1.80132	3.78644
hsa-miR-7156-3p	2.19506	1.13426	0.215678	0.999762	8.4287	0.324427	2.85921	14.4567	4.74347	6.43694
hsa-miR-1301-3p	-1.95657	-0.968325	0.21211	0.999762	22.3211	14.4694	22.3158	3.37948	4.80351	22.0244
hsa-miR-6511b-5p	1.75467	0.811199	0.516726	0.999762	3.23156	0.129771	0.557894	0.688413	1.5011	4.79615
hsa-miR-153-3p	-1.66874	-0.738756	0.476232	0.999762	3.83123	3.37404	8.99604	1.56458	7.86575	0.252429
hsa-miR-448	1.54021	0.623126	0.646125	0.999762	0.13326	0.194656	2.37105	0.938746	2.40176	0.757287
hsa-miR-4666b	1.33299	0.414666	0.593854	0.999762	29.9502	46.8472	24.4776	58.1396	43.0515	33.7624
hsa-miR-33a-5p	1.29228	0.369921	0.659003	0.999762	47.8071	10.5114	73.642	50.8174	44.4925	75.2239
hsa-miR-192-3p	1.26954	0.344301	0.721367	0.999762	3.9978	3.30915	3.13815	10.1385	1.44105	1.7039
hsa-miR-3064-3p	1.98622	0.990023	0.416319	0.999762	1.53249	1.10305	0.139473	4.25565	1.08079	0.252429
hsa-miR-4715-3p	1.47097	0.556768	0.552261	0.999762	4.39758	4.34732	1.18552	2.12782	6.06443	6.50005
hsa-miR-12121	-1.26107	-0.334643	0.647109	0.999762	20.9552	19.5954	18.4105	8.94937	18.0132	19.8157
hsa-miR-1202	1.39089	0.476013	0.546273	0.999762	4.96394	8.49998	3.06842	9.38746	5.464	8.14084
hsa-miR-5006-5p	-1.26671	-0.34109	0.669617	0.999762	4.49753	8.75952	8.78683	10.7643	3.30241	3.28158
hsa-miR-4659a-5p	-1.06739	-0.0940884	0.89963	0.999762	17.2905	18.2328	18.6197	25.7842	15.011	9.90784
hsa-miR-874-3p	1.32142	0.402088	0.586601	0.999762	16.391	13.3015	26.8486	20.4021	27.0198	27.1361
hsa-miR-6836-3p	-1.11642	-0.158873	0.844079	0.999762	18.5898	10.2519	5.36973	11.703	14.2904	4.73305
hsa-miR-6894-3p	-1.41765	-0.503503	0.495587	0.999762	10.1611	10.187	7.88025	3.56723	5.76421	10.602
hsa-miR-6514-3p	1.08961	0.123812	0.865862	0.999762	15.7247	15.5725	16.1092	15.9587	13.69	22.0244
hsa-miR-4737	-1.00195	-0.00281427	0.998205	0.999762	3.3315	0.324427	0.836841	0.312915	1.26092	2.96604
hsa-let-7i-3p	-1.12309	-0.167468	0.818028	0.999762	8.46202	11.2252	33.8921	9.07454	21.2555	17.2914
hsa-miR-6850-5p	-1.34186	-0.424233	0.63741	0.999762	7.42925	59.8243	5.09078	35.5472	6.60483	11.738
hsa-miR-4639-5p	-1.8105	-0.85639	0.407473	0.999762	3.13161	5.90456	2.51052	2.81624	2.58189	0.946609
hsa-miR-5089-3p	-1.40481	-0.490375	0.604722	0.999762	2.46531	7.85112	2.16184	4.13048	2.94215	1.767
hsa-miR-449c-3p	-1.73709	-0.796671	0.518794	0.999762	3.29819	1.16794	1.53421	2.44074	0.840615	0.189322
hsa-miR-1178-3p	-2.18837	-1.12986	0.394637	0.999762	3.69797	0.0648853	4.7421	3.25432	0.180132	0.441751
hsa-miR-6772-3p	-1.40823	-0.493881	0.600864	0.999762	2.36537	5.38548	5.5092	4.75631	1.86136	2.71361
hsa-miR-5691	-1.27662	-0.352329	0.632483	0.999762	9.06169	7.72135	12.971	6.6338	3.84281	12.8108
hsa-miR-628-5p	1.16443	0.219618	0.796161	0.999762	8.46202	3.1145	1.39473	3.75498	6.00439	5.49033
hsa-miR-3977	1.17426	0.231757	0.772754	0.999762	11.7269	5.90456	18.9684	15.9587	23.6573	3.34469
hsa-miR-3978	-1.1003	-0.137893	0.852453	0.999762	17.2572	52.7518	22.3855	34.6084	22.4564	26.8206
hsa-miR-6079	-2.49067	-1.31653	0.140526	0.999762	11.4937	8.8244	1.60394	2.9414	5.16378	0.69418
hsa-miR-6505-5p	-2.73033	-1.44907	0.111298	0.999762	74.9921	63.4578	7.88025	12.3914	36.1464	5.04858
hsa-miR-4520-3p	1.74535	0.803518	0.447874	0.999762	0.0666301	6.22899	3.83552	6.82155	4.56334	6.24762
hsa-miR-4776-5p	1.64204	0.715487	0.459169	0.999762	4.06443	0.454197	3.62631	4.88148	5.10373	3.4709
hsa-miR-4535	-1.64976	-0.722256	0.379911	0.999762	4.53084	9.47326	3.90526	3.75498	6.12448	0.946609
hsa-miR-4804-5p	-1.70442	-0.769278	0.349296	0.999762	15.1917	62.3548	12.8316	27.474	18.0732	7.44666
hsa-miR-1269a	-1.66394	-0.734606	0.354535	0.999762	11.2272	5.83968	7.6013	2.50332	3.84281	8.51948
hsa-miR-5009-5p	1.72482	0.786444	0.33153	0.999762	7.02947	27.5763	23.1526	39.3021	26.5394	33.5731
hsa-miR-4531	-1.75781	-0.813783	0.297066	0.999762	7.86235	18.4923	3.27763	4.4434	6.96509	5.42723
hsa-miR-1270	1.81005	0.856026	0.438407	0.999762	4.53084	0	4.39341	3.62982	7.3854	5.1748
hsa-miR-6874-5p	-1.95301	-0.9657	0.248308	0.999762	8.1955	7.72135	3.48684	4.69373	2.76202	2.52429
hsa-miR-4443	1.64486	0.717964	0.42458	0.999762	3.06498	3.50381	4.81183	15.6458	1.74127	1.32525
hsa-miR-6515-5p	-2.41811	-1.27388	0.150141	0.999762	8.8618	8.75952	4.95131	6.44605	0.360263	2.52429
hsa-miR-3198	-1.37295	-0.457278	0.616815	0.999762	4.09775	15.4427	1.60394	4.56856	9.54698	1.26215
hsa-miR-1261	1.17526	0.23298	0.728276	0.999762	89.4175	154.103	191.776	125.667	137.621	248.138
hsa-miR-432-3p	-2.24771	-1.16846	0.119407	0.999762	24.1867	79.4196	15.2723	18.3368	17.2926	17.2283
hsa-miR-7150	2.15609	1.10842	0.35854	0.999762	5.23046	0.0648853	0.488157	2.25299	2.52184	7.8253
hsa-miR-4642	1.43085	0.516873	0.593528	0.999762	4.16438	0.648853	4.7421	3.94273	6.48474	3.28158
hsa-miR-548s	1.75958	0.815233	0.261215	0.999762	7.99561	5.70991	4.1842	9.76295	7.3854	14.6409
hsa-miR-4701-5p	-1.45655	-0.54255	0.466399	0.999762	20.1223	27.3167	14.2263	15.7709	9.66707	16.9128
hsa-miR-4435	1.48841	0.573774	0.451818	0.999762	13.326	7.98089	8.36841	17.2729	13.2097	14.1991
hsa-miR-3187-3p	-1.89568	-0.922716	0.203807	0.999762	70.8944	121.465	34.9381	40.2409	35.606	44.0489
hsa-miR-328-3p	1.56999	0.650753	0.333923	0.999762	67.5962	61.7059	128.943	81.6709	106.218	217.468
hsa-miR-6878-3p	-1.02447	-0.0348804	0.962225	0.999762	55.836	97.4578	25.1052	53.133	77.4566	43.544
hsa-miR-4730	-1.2352	-0.304749	0.719311	0.999762	2.63189	9.53814	7.88025	2.12782	8.22601	5.80587
hsa-miR-6770-3p	-1.82782	-0.870126	0.307626	0.999762	5.86345	50.351	4.46315	9.19971	10.1474	13.8205
hsa-miR-8057	-1.65249	-0.724643	0.348724	0.999762	18.19	28.6144	9.4842	18.7749	7.14522	8.14084
hsa-miR-647	-1.21274	-0.278271	0.692227	0.999762	27.1184	34.9732	47.0723	21.5286	26.8997	41.4615
hsa-miR-6842-3p	-1.30628	-0.385468	0.634848	0.999762	5.23046	21.2824	10.0421	6.75897	9.8472	11.2962
hsa-miR-30c-1-3p	-1.10688	-0.146495	0.843052	0.999762	18.823	9.7328	25.175	18.0865	14.1704	16.2817
hsa-miR-1273h-5p	-1.25996	-0.333382	0.667355	0.999762	6.82958	23.748	13.0408	15.7083	8.28606	10.5389
hsa-miR-450b-3p	-1.57375	-0.654205	0.383628	0.999762	14.1922	34.8434	12.5526	11.3901	16.392	11.2962
hsa-miR-6728-5p	-1.0549	-0.0771061	0.915503	0.999762	89.5175	48.7938	202.446	62.5205	74.9948	185.472
hsa-miR-5089-5p	1.14323	0.193119	0.817835	0.999762	31.2495	52.5571	12.8316	31.667	58.2426	20.573
hsa-miR-6724-5p	1.10025	0.137826	0.88822	0.999762	0.566356	9.40837	2.23158	3.44207	5.64413	4.2913
hsa-miR-1228-5p	-1.95749	-0.969003	0.272221	0.999762	8.8618	6.35876	7.67104	3.37948	7.98584	0.315536
hsa-miR-10400-3p	1.26987	0.34468	0.668474	0.999762	4.69742	6.09922	8.99604	10.3262	6.30461	8.26705
hsa-miR-1587	-1.44842	-0.53448	0.512181	0.999762	20.3222	25.4999	48.3276	8.13579	24.4379	32.374
hsa-miR-2110	-1.30158	-0.38026	0.614096	0.999762	22.9874	41.9159	31.9394	10.8894	29.0612	34.3935
hsa-miR-6810-5p	2.24401	1.16608	0.391064	0.999762	0.0999451	0.129771	1.11579	1.50199	1.26092	0.189322
hsa-miR-3150a-3p	-1.8498	-0.887369	0.254314	0.999762	8.82848	9.92745	3.4171	5.44472	3.60263	2.96604
hsa-miR-1227-5p	-1.76103	-0.81642	0.396777	0.999762	2.39868	37.1793	1.04605	10.0759	8.04588	4.92237
hsa-miR-1275	1.03106	0.0441225	0.960065	0.999762	8.69522	5.90456	9.69341	1.68974	4.68342	18.6798
hsa-miR-7109-5p	1.09501	0.130943	0.883236	0.999762	3.43145	15.3778	4.1842	7.50996	16.6922	0.946609
hsa-miR-6751-5p	-1.83682	-0.877209	0.256907	0.999762	9.66136	4.80151	8.64736	3.37948	5.76421	3.4709
hsa-miR-6737-5p	-1.0259	-0.0368892	0.959286	0.999762	389.319	212.175	1064.81	306.97	492.66	824.56
hsa-miR-1229-5p	-1.1779	-0.236223	0.768599	0.999762	11.4604	6.03433	5.36973	6.32089	3.48255	9.71852
hsa-miR-1262	-1.59178	-0.670639	0.462462	0.999762	10.9273	4.54197	0.697367	2.50332	2.64193	5.04858
hsa-miR-6741-5p	1.01129	0.0161909	0.979776	0.999762	182	142.229	413.678	149.573	209.373	387.226
hsa-miR-3940-5p	-1.08271	-0.114647	0.877632	0.999762	48.4734	76.1105	187.383	48.2515	71.5723	168.244
hsa-miR-6839-3p	-1.81176	-0.857392	0.255858	0.999762	20.6553	32.5724	8.78683	11.703	12.4891	10.0341
hsa-miR-150-3p	-2.73712	-1.45266	0.261571	0.999762	3.49808	0.194656	1.325	0.500664	1.02075	0.315536
hsa-miR-5587-5p	-1.45725	-0.543246	0.662462	0.999762	4.49753	0.324427	3.4171	0.125166	2.88211	2.65051
hsa-miR-6843-3p	1.68345	0.751419	0.329666	0.999762	3.0983	7.00761	3.20789	8.51129	6.72492	7.00491
hsa-miR-7855-5p	-1.4273	-0.513294	0.555	0.999762	363.534	1239.37	1616.57	1115.79	743.704	396.061
hsa-miR-487a-5p	1.28158	0.357928	0.576242	0.999762	66.2969	92.5265	115.205	125.729	95.1095	130.001
hsa-miR-218-1-3p	1.39594	0.481237	0.475084	0.999762	129.362	246.954	62.2052	186.185	295.956	130.001
hsa-miR-29b-2-5p	-1.60607	-0.683536	0.368149	0.999762	4.06443	6.74807	9.34472	4.31823	3.54259	4.54372
hsa-miR-2054	1.03883	0.0549652	0.970787	0.999762	0.13326	0.0648853	2.78947	1.75232	1.26092	0.0631073
hsa-let-7c-3p	-1.12881	-0.174804	0.870983	0.999762	7.32931	0.0648853	7.67104	2.12782	2.64193	8.58259
hsa-let-7a-2-3p	-1.26171	-0.335384	0.688093	0.999762	58.5012	22.9045	80.1275	22.2796	40.0493	65.6947
hsa-miR-493-5p	1.2573	0.330325	0.621016	0.999762	415.672	236.053	672.053	664.757	392.807	606.777
hsa-miR-135a-2-3p	-1.77899	-0.831055	0.570983	0.999762	2.59857	0.0648853	0.557894	0.062583	0.180132	1.57768
hsa-miR-568	-2.94164	-1.55662	0.320926	0.999762	0.233205	0	0.557894	0	0	0.252429
hsa-miR-675-3p	-1.84609	-0.884471	0.472344	0.999762	2.46531	0.194656	5.64868	2.75365	0.720527	1.00972
hsa-miR-297	-1.91656	-0.938518	0.225662	0.999762	45.6749	39.7098	10.3908	19.7137	19.9346	10.3496
hsa-miR-10395-3p	1.79984	0.84787	0.50491	0.999762	1.19934	0.324427	2.30131	5.44472	0.120088	1.32525
hsa-miR-3912-5p	1.57182	0.652437	0.553884	0.999762	0.299835	3.69846	2.23158	2.31557	4.9236	2.46118
hsa-miR-4433b-5p	1.21918	0.285908	0.812494	0.999762	1.56581	0.129771	4.95131	2.69107	3.30241	2.08254
hsa-miR-676-3p	1.43584	0.521896	0.606029	0.999762	14.4254	0	4.53289	5.63247	10.0874	11.5486
hsa-miR-6818-3p	-1.29289	-0.370603	0.6867	0.999762	3.19824	4.34732	4.32368	3.88015	2.34171	2.77672
hsa-miR-4288	1.01664	0.0238153	0.974874	0.999762	14.4587	19.0114	5.78815	25.659	5.94435	8.33016
hsa-miR-1231	-1.26214	-0.335873	0.666955	0.999762	6.52975	5.83968	5.29999	6.57122	3.48255	4.03887
hsa-miR-511-5p	1.80422	0.851378	0.406097	0.999762	4.86399	0	6.0671	9.32487	4.74347	5.67966
hsa-miR-3611	-2.41593	-1.27258	0.232555	0.999762	5.93008	11.9389	3.69605	0.187749	8.46619	0.252429
hsa-miR-6808-3p	1.22393	0.291522	0.749427	0.999762	3.3315	4.8664	4.67236	2.5659	8.04588	5.04858
hsa-miR-8070	-1.1352	-0.182944	0.829401	0.999762	38.6454	23.0992	7.6013	36.173	8.94654	16.0293
hsa-miR-550b-2-5p	1.18778	0.248272	0.712244	0.999762	11.4271	15.3778	16.1789	21.6537	13.9902	15.1457
hsa-miR-147b-3p	1.7883	0.83859	0.513119	0.999762	2.99835	0	0.697367	1.43941	1.9214	3.34469
hsa-miR-210-3p	1.04327	0.061115	0.935252	0.999762	13.7591	10.8358	28.871	15.6458	15.4313	24.6118
hsa-miR-218-5p	1.03801	0.0538167	0.944729	0.999762	1243.28	1135.49	2087.78	2107.42	1257.62	1271.17
hsa-miR-6833-5p	1.60836	0.685587	0.404416	0.999762	4.76405	7.59158	2.0921	10.4514	2.40176	10.4127
hsa-miR-4752	-1.75683	-0.812976	0.406977	0.999762	3.43145	7.59158	5.09078	6.94672	1.38101	0.820395
hsa-miR-7108-5p	1.38659	0.471539	0.480296	0.999762	82.2881	76.954	109.417	109.458	93.9687	169.001
hsa-miR-4474-3p	1.53058	0.61408	0.41838	0.999762	3.03167	14.145	5.29999	10.4514	7.3854	16.471
hsa-miR-4265	1.32238	0.403142	0.615896	0.999762	4.36427	8.69463	25.5236	17.4607	13.8101	19.6264
hsa-miR-6796-5p	-2.37758	-1.24949	0.315184	0.999762	2.63189	0.519083	0.906578	0.312915	0.540395	0.883502
hsa-miR-6759-5p	1.42882	0.514825	0.423092	0.999762	190.662	211.137	297.427	409.856	351.317	237.662
hsa-miR-592	1.60553	0.683048	0.53656	0.999762	1.23266	2.85495	1.67368	4.38081	1.14083	3.66022
hsa-miR-6818-5p	1.03639	0.0515614	0.96379	0.999762	2.23211	1.16794	4.60262	4.81889	0.120088	3.34469
hsa-miR-147a	-1.78002	-0.831891	0.356379	0.999762	6.69632	5.45037	3.62631	2.81624	4.20307	1.89322
[truncated: 95 more rows]
