# Supplementary material for: Tissue-specific responses of brain and lung endothelial cell miRNA and mRNA profiles to the ring-stage Plasmodium falciparum-infected red blood cells
Source: Research Square preprint supplement (doi:10.21203/rs.3.rs-4222036/v1), 2024-04-08
Supplement: Supplementary file 10 [file d6a76895b06a28823879ab57.xlsx]

## Sheet: Sheet0
© 2000-2024 QIAGEN. All rights reserved.
ID	Symbol	Expr Fold Change	Source	miRNA Confidence	ID	Symbol	Expr Fold Change	Pathway
hsa-miR-329-3p	miR-329-3p (and other miRNAs w/seed ACACACC)	-12,236	TargetScan Human	High (predicted)	AAMP	AAMP	-4,289	NLR signaling pathways,Signal amplification,Signaling by EGFR,Signaling by VEGF
hsa-miR-654-5p	miR-541-3p (and other miRNAs w/seed GGUGGGC)	-12,236	TargetScan Human	High (predicted)	ABCA2	ABCA2	-1,874	ABC-family proteins mediated transport,Xenobiotic Metabolism General Signaling Pathway
hsa-miR-3130-5p	miR-3130-5p (and other miRNAs w/seed ACCCAGU)	-24,471	TargetScan Human	High (predicted)	ABHD17B	ABHD17B	-3,465	RAS processing
hsa-miR-3130-5p	miR-3130-5p (and other miRNAs w/seed ACCCAGU)	-24,471	TargetScan Human	High (predicted)	ABHD17C	ABHD17C	-6,188	RAS processing
hsa-miR-501-5p	miR-501-5p (miRNAs w/seed AUCCUUU)	-24,471	TargetScan Mouse,TargetScan Human	High (predicted),Moderate (predicted)	ABL2	ABL2	2,459	FLT3 Signaling,IL-15 Production,PDGF Signaling,RHO GTPase cycle,RHOA Signaling,Signaling by ROBO receptors,Sperm Motility
hsa-miR-505-3p	miR-505-3p (miRNAs w/seed GUCAACA)	-12,236	TargetScan Human	High (predicted)	ABL2	ABL2	2,459	FLT3 Signaling,IL-15 Production,PDGF Signaling,RHO GTPase cycle,RHOA Signaling,Signaling by ROBO receptors,Sperm Motility
hsa-miR-127-3p	miR-127-3p (miRNAs w/seed CGGAUCC)	50,550	TargetScan Human	High (predicted)	ACO2	ACO2	-3,332	Iron homeostasis signaling pathway,Macrophage Classical Activation Signaling Pathway,Mitochondrial Dysfunction,Mitochondrial protein import,TCA Cycle II (Eukaryotic),The citric acid (TCA) cycle and respiratory electron transport
hsa-miR-155-5p	miR-155-5p (miRNAs w/seed UAAUGCU)	2,493	TargetScan Mouse,TargetScan Human	High (predicted)	ACTA1	ACTA1	-445,009	ABRA Signaling Pathway,Actin Cytoskeleton Signaling,Agranulocyte Adhesion and Diapedesis,Agrin Interactions at Neuromuscular Junction,Calcium Signaling,Caveolar-mediated Endocytosis Signaling,Cellular Effects of Sildenafil (Viagra),Clathrin-mediated Endocytosis Signaling,Crosstalk between Dendritic Cells and Natural Killer Cells,Death Receptor Signaling,Dilated Cardiomyopathy Signaling Pathway,EI…
hsa-miR-485-5p	miR-485-5p (and other miRNAs w/seed GAGGCUG)	-4,079	TargetScan Mouse,TargetScan Human	High (predicted),Moderate (predicted)	ACTR3	ACTR3	-5,352	ABRA Signaling Pathway,Actin Cytoskeleton Signaling,Actin Nucleation by ARP-WASP Complex,Axonal Guidance Signaling,CD28 Signaling in T Helper Cells,CDC42 Signaling,Clathrin-mediated endocytosis,Clathrin-mediated Endocytosis Signaling,EPH-Ephrin signaling,Ephrin Receptor Signaling,Epithelial Adherens Junction Signaling,FAK Signaling,Fcgamma receptor (FCGR) dependent phagocytosis,Fcγ Receptor-media…
hsa-miR-199a-3p	miR-199a-3p (and other miRNAs w/seed CAGUAGU)	-1,224	TargetScan Mouse,TargetScan Human	High (predicted),Moderate (predicted)	ACVR2A	ACVR2A	-6,492	Activin Inhibin Signaling Pathway,Adipogenesis pathway,BMP signaling pathway,Cachexia Signaling Pathway,Cardiac Hypertrophy Signaling (Enhanced),Cardiomyocyte Differentiation via BMP Receptors,Epithelial Adherens Junction Signaling,Factors Promoting Cardiogenesis in Vertebrates,FAK Signaling,FAT10 Cancer Signaling Pathway,GADD45 Signaling,Hepatic Fibrosis Signaling Pathway,HEY1 Signaling Pathway,…
hsa-miR-625-5p	miR-625-5p (and other miRNAs w/seed GGGGGAA)	-8,157	TargetScan Mouse,TargetScan Human	High (predicted),Moderate (predicted)	ADAR	ADAR	3,207	Activation of IRF by Cytosolic Pattern Recognition Receptors,Chronic Myeloid Leukemia Signaling,Interferon alpha/beta signaling,MicroRNA Biogenesis Signaling Pathway,mRNA Editing
hsa-miR-370-3p	miR-370-3p (and other miRNAs w/seed CCUGCUG)	-6,118	TargetScan Mouse,TargetScan Human	High (predicted),Moderate (predicted)	ADCY3	ADCY3	50,580	Acetylcholine Receptor Signaling Pathway,Adrenergic Receptor Signaling Pathway (Enhanced),Adrenomedullin signaling pathway,Apelin Adipocyte Signaling Pathway,Apelin Endothelial Signaling Pathway,Cachexia Signaling Pathway,cAMP-mediated signaling,Cardiac Hypertrophy Signaling,Cardiac Hypertrophy Signaling (Enhanced),Cardiac β-adrenergic Signaling,CDK5 Signaling,Cellular Effects of Sildenafil (Viag…
hsa-miR-92b-3p	miR-92a-3p (and other miRNAs w/seed AUUGCAC)	76,008	TargetScan Mouse,TargetScan Human	High (predicted),Moderate (predicted)	ADCY3	ADCY3	50,580	Acetylcholine Receptor Signaling Pathway,Adrenergic Receptor Signaling Pathway (Enhanced),Adrenomedullin signaling pathway,Apelin Adipocyte Signaling Pathway,Apelin Endothelial Signaling Pathway,Cachexia Signaling Pathway,cAMP-mediated signaling,Cardiac Hypertrophy Signaling,Cardiac Hypertrophy Signaling (Enhanced),Cardiac β-adrenergic Signaling,CDK5 Signaling,Cellular Effects of Sildenafil (Viag…
hsa-miR-625-5p	miR-625-5p (and other miRNAs w/seed GGGGGAA)	-8,157	TargetScan Human	High (predicted)	ADGRG6	ADGRG6	190,365	BBSome Signaling Pathway,Breast Cancer Regulation by Stathmin1,CREB Signaling in Neurons,EGR2 and SOX10-mediated initiation of Schwann cell myelination,FAK Signaling,G-Protein Coupled Receptor Signaling,Molecular Mechanisms of Cancer,Myelination Signaling Pathway,Phagosome Formation,S100 Family Signaling Pathway
hsa-miR-323a-5p	miR-323-5p (and other miRNAs w/seed GGUGGUC)	-8,157	TargetScan Mouse,TargetScan Human	High (predicted),Moderate (predicted)	ADGRL3	ADGRL3	-157,500	BBSome Signaling Pathway,Breast Cancer Regulation by Stathmin1,CREB Signaling in Neurons,FAK Signaling,G-Protein Coupled Receptor Signaling,Molecular Mechanisms of Cancer,Phagosome Formation,S100 Family Signaling Pathway
hsa-miR-505-3p	miR-505-3p (miRNAs w/seed GUCAACA)	-12,236	TargetScan Human	High (predicted)	ADGRL4	ADGRL4	19,616	BBSome Signaling Pathway,Breast Cancer Regulation by Stathmin1,CREB Signaling in Neurons,FAK Signaling,G-Protein Coupled Receptor Signaling,Molecular Mechanisms of Cancer,Phagosome Formation,S100 Family Signaling Pathway
hsa-miR-3152-5p	miR-3152-5p (miRNAs w/seed UUGCCUC)	-24,471	TargetScan Human	High (predicted)	ADORA2B	ADORA2B	103,056	BBSome Signaling Pathway,Breast Cancer Regulation by Stathmin1,cAMP-mediated signaling,Class A/1 (Rhodopsin-like receptors),CREB Signaling in Neurons,FAK Signaling,G alpha (s) signalling events,G-Protein Coupled Receptor Signaling,Gαs Signaling,Macrophage Alternative Activation Signaling Pathway,Molecular Mechanisms of Cancer,Netrin Signaling,Neurovascular Coupling Signaling Pathway,Pancreatic Se…
hsa-miR-323b-3p	miR-323b-3p (miRNAs w/seed CCAAUAC)	-12,236	TargetScan Human	High (predicted)	AGFG1	AGFG1	-6,783	Cargo recognition for clathrin-mediated endocytosis,Clathrin-mediated endocytosis
hsa-miR-2116-3p	miR-2116-3p (miRNAs w/seed CUCCCAU)	-24,471	TargetScan Human	High (predicted)	AIFM2	AIFM2	5,042	Ferroptosis Signaling Pathway,FXR/RXR Activation,TP53 Regulates Transcription of Cell Death Genes
hsa-miR-137-3p	miR-137-3p (miRNAs w/seed UAUUGCU)	-8,157	TargetScan Human	High (predicted)	AJUBA	AJUBA	2,264	Activation of anterior HOX genes in hindbrain during early embryogenesis,Cellular response to hypoxia,HIPPO signaling,Mitotic G2-G2/M phases,Pulmonary Fibrosis Idiopathic Signaling Pathway
hsa-miR-137-3p	miR-137-3p (miRNAs w/seed UAUUGCU)	-8,157	TargetScan Mouse,TargetScan Human	High (predicted),Moderate (predicted)	ALDH1A2	ALDH1A2	97,274	Aryl Hydrocarbon Receptor Signaling,Autism Signaling Pathway,Dopamine Degradation,Ethanol Degradation II,Ethanol Degradation IV,Fatty Acid α-oxidation,Histamine Degradation,LPS/IL-1 Mediated Inhibition of RXR Function,Noradrenaline and Adrenaline Degradation,Oxidative Ethanol Degradation III,Putrescine Degradation III,RAR Activation,Retinoate Biosynthesis I,Serotonin Degradation,Signaling by Reti…
hsa-miR-487b-3p	miR-487b-3p (miRNAs w/seed AUCGUAC)	-2,719	TargetScan Human	High (predicted)	ALDH1A3	ALDH1A3	167,438	Aryl Hydrocarbon Receptor Signaling,Autism Signaling Pathway,Dopamine Degradation,Ethanol Degradation II,Ethanol Degradation IV,Fatty Acid α-oxidation,Histamine Degradation,LPS/IL-1 Mediated Inhibition of RXR Function,Noradrenaline and Adrenaline Degradation,Oxidative Ethanol Degradation III,Putrescine Degradation III,RAR Activation,Retinoate Biosynthesis I,Serotonin Degradation,Signaling by Reti…
hsa-miR-323a-5p	miR-323-5p (and other miRNAs w/seed GGUGGUC)	-8,157	TargetScan Human	High (predicted)	ALDH3B1	ALDH3B1	-8,817	Aryl Hydrocarbon Receptor Signaling,Autism Signaling Pathway,Dopamine Degradation,Ethanol Degradation II,Ethanol Degradation IV,Fatty Acid α-oxidation,Histamine Degradation,LPS/IL-1 Mediated Inhibition of RXR Function,Neutrophil degranulation,Noradrenaline and Adrenaline Degradation,Oxidative Ethanol Degradation III,Putrescine Degradation III,Serotonin Degradation,Sphingolipid metabolism,Tryptoph…
hsa-miR-505-3p	miR-505-3p (miRNAs w/seed GUCAACA)	-12,236	TargetScan Human	High (predicted)	ANAPC11	ANAPC11	3,336	Cell Cycle Checkpoints,Class I MHC mediated antigen processing and presentation,DNA Replication Pre-Initiation,Kinetochore Metaphase Signaling Pathway,Mitotic Metaphase and Anaphase,Mitotic Roles of Polo-Like Kinase,Protein Kinase A Signaling,Protein Ubiquitination Pathway,Regulation of mitotic cell cycle,Senescence Pathway,Senescence-Associated Secretory Phenotype (SASP),Synthesis of DNA,Transcr…
hsa-miR-3187-3p	miR-3187-3p (miRNAs w/seed UGGCCAU)	-24,471	TargetScan Human	High (predicted)	ANAPC4	ANAPC4	-10,827	Cell Cycle Checkpoints,Class I MHC mediated antigen processing and presentation,DNA Replication Pre-Initiation,Kinetochore Metaphase Signaling Pathway,Mitotic Metaphase and Anaphase,Mitotic Roles of Polo-Like Kinase,Protein Kinase A Signaling,Protein Ubiquitination Pathway,Regulation of mitotic cell cycle,Senescence Pathway,Senescence-Associated Secretory Phenotype (SASP),Synthesis of DNA,Transcr…
hsa-miR-431-5p	miR-431-5p (and other miRNAs w/seed GUCUUGC)	-6,118	TargetScan Human	High (predicted)	ANGPT2	ANGPT2	40,613	Angiopoietin Signaling,Apelin Cardiac Fibroblast Signaling Pathway,Cell surface interactions at the vascular wall,IL-8 Signaling,White Adipose Tissue Browning Pathway
hsa-miR-193b-3p	miR-193a-3p (and other miRNAs w/seed ACUGGCC)	-12,236	TargetScan Mouse,TargetScan Human	High (predicted),Moderate (predicted)	ANKFY1	ANKFY1	-3,388	Macropinocytosis Signaling,RHO GTPase cycle
hsa-miR-134-5p	miR-3118 (and other miRNAs w/seed GUGACUG)	-24,471	TargetScan Human	High (predicted)	ANKH	ANKH	-2,376	Miscellaneous transport and binding events,Osteoarthritis Pathway
hsa-miR-431-5p	miR-431-5p (and other miRNAs w/seed GUCUUGC)	-6,118	TargetScan Mouse,TargetScan Human	High (predicted),Moderate (predicted)	ANKH	ANKH	-2,376	Miscellaneous transport and binding events,Osteoarthritis Pathway
hsa-miR-374a-5p	miR-374b-5p (and other miRNAs w/seed UAUAAUA)	-12,236	TargetScan Human	High (predicted)	ANXA1	ANXA1	2,777	Class A/1 (Rhodopsin-like receptors),G alpha (i) signalling events,G alpha (q) signalling events,Glucocorticoid Receptor Signaling,Immunogenic Cell Death Signaling Pathway,Interleukin-4 and Interleukin-13 signaling,S100 Family Signaling Pathway,Smooth Muscle Contraction
hsa-miR-376c-3p	miR-376c-3p (and other miRNAs w/seed ACAUAGA)	-4,079	TargetScan Human	High (predicted)	ANXA1	ANXA1	2,777	Class A/1 (Rhodopsin-like receptors),G alpha (i) signalling events,G alpha (q) signalling events,Glucocorticoid Receptor Signaling,Immunogenic Cell Death Signaling Pathway,Interleukin-4 and Interleukin-13 signaling,S100 Family Signaling Pathway,Smooth Muscle Contraction
hsa-miR-204-5p	miR-204-5p (and other miRNAs w/seed UCCCUUU)	85,448	TargetScan Mouse,TargetScan Human	High (predicted)	AP1S1	AP1S1	-2,415	Clathrin-mediated Endocytosis Signaling,CTLA4 Signaling in Cytotoxic T Lymphocytes,Eicosanoid Signaling,MHC class II antigen presentation,Phagosome Formation,Protein Sorting Signaling Pathway,TP53 Regulates Transcription of DNA Repair Genes,trans-Golgi Network Vesicle Budding,Virus Entry via Endocytic Pathways
hsa-miR-204-5p	miR-204-5p (and other miRNAs w/seed UCCCUUU)	85,448	TargetScan Mouse,TargetScan Human	High (predicted)	AP1S2	AP1S2	-2,538	Clathrin-mediated Endocytosis Signaling,CTLA4 Signaling in Cytotoxic T Lymphocytes,Eicosanoid Signaling,MHC class II antigen presentation,Phagosome Formation,Protein Sorting Signaling Pathway,TP53 Regulates Transcription of DNA Repair Genes,trans-Golgi Network Vesicle Budding,Virus Entry via Endocytic Pathways
hsa-miR-323b-3p	miR-323b-3p (miRNAs w/seed CCAAUAC)	-12,236	TargetScan Human	High (predicted)	AP1S2	AP1S2	-2,538	Clathrin-mediated Endocytosis Signaling,CTLA4 Signaling in Cytotoxic T Lymphocytes,Eicosanoid Signaling,MHC class II antigen presentation,Phagosome Formation,Protein Sorting Signaling Pathway,TP53 Regulates Transcription of DNA Repair Genes,trans-Golgi Network Vesicle Budding,Virus Entry via Endocytic Pathways
hsa-miR-137-3p	miR-137-3p (miRNAs w/seed UAUUGCU)	-8,157	TargetScan Mouse,TargetScan Human	High (predicted)	AP3S1	AP3S1	-1,954	Clathrin-mediated Endocytosis Signaling,Protein Sorting Signaling Pathway,trans-Golgi Network Vesicle Budding,Virus Entry via Endocytic Pathways
hsa-miR-3613-5p	miR-3613-5p (miRNAs w/seed GUUGUAC)	-24,471	TargetScan Human	High (predicted)	AP3S1	AP3S1	-1,954	Clathrin-mediated Endocytosis Signaling,Protein Sorting Signaling Pathway,trans-Golgi Network Vesicle Budding,Virus Entry via Endocytic Pathways
hsa-miR-493-5p	miR-493-5p (miRNAs w/seed UGUACAU)	-24,471	TargetScan Mouse,TargetScan Human	High (predicted),Moderate (predicted)	AP3S1	AP3S1	-1,954	Clathrin-mediated Endocytosis Signaling,Protein Sorting Signaling Pathway,trans-Golgi Network Vesicle Budding,Virus Entry via Endocytic Pathways
hsa-miR-155-5p	miR-155-5p (miRNAs w/seed UAAUGCU)	2,493	TargetScan Human	High (predicted)	APAF1	APAF1	-2,823	Amyotrophic Lateral Sclerosis Signaling,Apoptosis Signaling,Aryl Hydrocarbon Receptor Signaling,CD27 Signaling in Lymphocytes,CSDE1 Signaling Pathway,Cytotoxic T Lymphocyte-mediated Apoptosis of Target Cells,Death Receptor Signaling,DNA damage-induced 14-3-3σ Signaling,Docosahexaenoic Acid (DHA) Signaling,Erythropoietin Signaling Pathway,Granzyme B Signaling,Huntington's Disease Signaling,Inducti…
hsa-miR-376c-5p	miR-376b-5p (and other miRNAs w/seed GUGGAUA)	-24,471	TargetScan Human	High (predicted)	APEX1	APEX1	4,128	BER (Base Excision Repair) Pathway,cAMP-mediated signaling,Cardiac Hypertrophy Signaling (Enhanced),Cardiac β-adrenergic Signaling,G-Protein Coupled Receptor Signaling,Granzyme A Signaling,HIF1α Signaling,Protein Kinase A Signaling,RAR Activation,Relaxin Signaling,Resolution of Abasic Sites (AP sites),Sirtuin Signaling Pathway,tRNA Splicing
hsa-miR-214-3p	miR-214-3p (and other miRNAs w/seed CAGCAGG)	-4,894	TargetScan Human	High (predicted)	APLN	APLN	5,346	Apelin Adipocyte Signaling Pathway,Apelin Cardiac Fibroblast Signaling Pathway,Apelin Cardiomyocyte Signaling Pathway,Apelin Endothelial Signaling Pathway,Apelin Liver Signaling Pathway,Apelin Muscle Signaling Pathway,Apelin Pancreas Signaling Pathway,Class A/1 (Rhodopsin-like receptors),G alpha (i) signalling events
hsa-miR-625-5p	miR-625-5p (and other miRNAs w/seed GGGGGAA)	-8,157	TargetScan Human	High (predicted)	APLN	APLN	5,346	Apelin Adipocyte Signaling Pathway,Apelin Cardiac Fibroblast Signaling Pathway,Apelin Cardiomyocyte Signaling Pathway,Apelin Endothelial Signaling Pathway,Apelin Liver Signaling Pathway,Apelin Muscle Signaling Pathway,Apelin Pancreas Signaling Pathway,Class A/1 (Rhodopsin-like receptors),G alpha (i) signalling events
hsa-miR-376c-5p	miR-376b-5p (and other miRNAs w/seed GUGGAUA)	-24,471	TargetScan Human	High (predicted)	AR	AR	5,216	Activated PKN1 stimulates transcription of AR regulated genes KLK2 and KLK3,Androgen Signaling,Coronavirus Pathogenesis Pathway,Deubiquitination,DHCR24 Signaling Pathway,Generic Transcription Pathway,Glucocorticoid Receptor Signaling,HEY1 Signaling Pathway,HOTAIR Regulatory Pathway,HSP90 chaperone cycle for steroid hormone receptors in the presence of ligand,Prostate Cancer Signaling,Sertoli Cell…
hsa-miR-381-3p	miR-381-3p (and other miRNAs w/seed AUACAAG)	-12,236	TargetScan Human	High (predicted)	AR	AR	5,216	Activated PKN1 stimulates transcription of AR regulated genes KLK2 and KLK3,Androgen Signaling,Coronavirus Pathogenesis Pathway,Deubiquitination,DHCR24 Signaling Pathway,Generic Transcription Pathway,Glucocorticoid Receptor Signaling,HEY1 Signaling Pathway,HOTAIR Regulatory Pathway,HSP90 chaperone cycle for steroid hormone receptors in the presence of ligand,Prostate Cancer Signaling,Sertoli Cell…
hsa-miR-654-5p	miR-541-3p (and other miRNAs w/seed GGUGGGC)	-12,236	Ingenuity Expert Findings,TargetScan Human	Experimentally Observed,Moderate (predicted)	AR	AR	5,216	Activated PKN1 stimulates transcription of AR regulated genes KLK2 and KLK3,Androgen Signaling,Coronavirus Pathogenesis Pathway,Deubiquitination,DHCR24 Signaling Pathway,Generic Transcription Pathway,Glucocorticoid Receptor Signaling,HEY1 Signaling Pathway,HOTAIR Regulatory Pathway,HSP90 chaperone cycle for steroid hormone receptors in the presence of ligand,Prostate Cancer Signaling,Sertoli Cell…
hsa-miR-654-5p	miR-541-3p (and other miRNAs w/seed GGUGGGC)	-12,236	TargetScan Human	High (predicted)	ARAF	ARAF	-2,247	Acute Myeloid Leukemia Signaling,Adrenomedullin signaling pathway,Cancer Drug Resistance by Drug Efflux,Circadian Rhythm Signaling,Docosahexaenoic Acid (DHA) Signaling,Eicosanoid Signaling,Endocannabinoid Developing Neuron Pathway,Endothelin-1 Signaling,ERK/MAPK Signaling,Ferroptosis Signaling Pathway,Hepatic Fibrosis Signaling Pathway,HER-2 Signaling in Breast Cancer,HIF1α Signaling,Human Embryo…
hsa-miR-625-5p	miR-625-5p (and other miRNAs w/seed GGGGGAA)	-8,157	TargetScan Human	High (predicted)	ARAF	ARAF	-2,247	Acute Myeloid Leukemia Signaling,Adrenomedullin signaling pathway,Cancer Drug Resistance by Drug Efflux,Circadian Rhythm Signaling,Docosahexaenoic Acid (DHA) Signaling,Eicosanoid Signaling,Endocannabinoid Developing Neuron Pathway,Endothelin-1 Signaling,ERK/MAPK Signaling,Ferroptosis Signaling Pathway,Hepatic Fibrosis Signaling Pathway,HER-2 Signaling in Breast Cancer,HIF1α Signaling,Human Embryo…
hsa-miR-193a-5p	miR-193a-5p (miRNAs w/seed GGGUCUU)	-24,471	TargetScan Human	High (predicted)	ARAP3	ARAP3	-2,523	RHO GTPase cycle
hsa-miR-654-5p	miR-541-3p (and other miRNAs w/seed GGUGGGC)	-12,236	TargetScan Human	High (predicted)	ARFGAP1	ARFGAP1	2,294	Clathrin-mediated endocytosis,COPI-mediated anterograde transport,Intra-Golgi and retrograde Golgi-to-ER traffic,Protein Sorting Signaling Pathway,XBP1(S) activates chaperone genes
hsa-miR-214-3p	miR-214-3p (and other miRNAs w/seed CAGCAGG)	-4,894	TargetScan Mouse,TargetScan Human	High (predicted),Moderate (predicted)	ARHGAP17	ARHGAP17	2,463	RHO GTPase cycle
hsa-miR-454-3p	miR-130a-3p (and other miRNAs w/seed AGUGCAA)	-24,471	TargetScan Human	High (predicted)	ARHGAP24	ARHGAP24	570,626	Actin Cytoskeleton Signaling,RHO GTPase cycle
hsa-miR-377-3p	miR-377-3p (miRNAs w/seed UCACACA)	-24,471	TargetScan Mouse,TargetScan Human	High (predicted),Moderate (predicted)	ARHGEF37	ARHGEF37	8,916	G alpha (12/13) signalling events,p75 NTR receptor-mediated signalling,Reelin Signaling in Neurons,Thrombin Signaling
hsa-miR-155-5p	miR-155-5p (miRNAs w/seed UAAUGCU)	2,493	TargetScan Mouse,TarBase,TargetScan Human	Experimentally Observed,High (predicted),Moderate (predicted)	ARID2	ARID2	-22,953	AMPK Signaling,Glucocorticoid Receptor Signaling,Hereditary Breast Cancer Signaling,RAR Activation,Ribonucleotide Reductase Signaling Pathway,Role of BRCA1 in DNA Damage Response,Transcriptional regulation by RUNX1
hsa-miR-376c-5p	miR-376b-5p (and other miRNAs w/seed GUGGAUA)	-24,471	TargetScan Human	High (predicted)	ARID2	ARID2	-22,953	AMPK Signaling,Glucocorticoid Receptor Signaling,Hereditary Breast Cancer Signaling,RAR Activation,Ribonucleotide Reductase Signaling Pathway,Role of BRCA1 in DNA Damage Response,Transcriptional regulation by RUNX1
hsa-miR-625-5p	miR-625-5p (and other miRNAs w/seed GGGGGAA)	-8,157	TargetScan Mouse,TargetScan Human	High (predicted)	ARID2	ARID2	-22,953	AMPK Signaling,Glucocorticoid Receptor Signaling,Hereditary Breast Cancer Signaling,RAR Activation,Ribonucleotide Reductase Signaling Pathway,Role of BRCA1 in DNA Damage Response,Transcriptional regulation by RUNX1
hsa-miR-323a-3p	miR-323-3p (and other miRNAs w/seed ACAUUAC)	-6,118	TargetScan Mouse,TargetScan Human	High (predicted)	ARL1	ARL1	-2,154	Intra-Golgi and retrograde Golgi-to-ER traffic
hsa-miR-376c-3p	miR-376c-3p (and other miRNAs w/seed ACAUAGA)	-4,079	TargetScan Human	High (predicted)	ARL1	ARL1	-2,154	Intra-Golgi and retrograde Golgi-to-ER traffic
hsa-miR-487a-5p	miR-487a-5p (and other miRNAs w/seed UGGUUAU)	-8,157	TargetScan Human	High (predicted)	ARL13B	ARL13B	-4,184	Aggrephagy,Chaperone Mediated Autophagy,Cilium Assembly,Late endosomal microautophagy,RHO GTPase cycle
hsa-miR-214-3p	miR-214-3p (and other miRNAs w/seed CAGCAGG)	-4,894	TargetScan Mouse,TargetScan Human	High (predicted),Moderate (predicted)	ARL2	ARL2	3,747	Protein folding,RAS processing,Transport of vitamins, nucleosides, and related molecules
hsa-miR-654-5p	miR-541-3p (and other miRNAs w/seed GGUGGGC)	-12,236	TargetScan Human	High (predicted)	ARL8A	ARL8A	-2,120	Neutrophil degranulation
hsa-miR-377-3p	miR-377-3p (miRNAs w/seed UCACACA)	-24,471	TargetScan Mouse,TargetScan Human	High (predicted)	ARMC8	ARMC8	-4,004	Neutrophil degranulation
hsa-miR-337-5p	miR-337-5p (miRNAs w/seed AACGGCU)	-12,236	TargetScan Human	High (predicted)	ARNTL	BMAL1	-2,874	Adipogenesis pathway,BMAL1:CLOCK,NPAS2 activates circadian gene expression,Chaperone Mediated Autophagy Signaling Pathway,Circadian Clock,Circadian Rhythm Signaling,Heme signaling,NAD Signaling Pathway,Regulation of lipid metabolism by PPARalpha,Sirtuin Signaling Pathway,Transcriptional Regulation by NPAS4
hsa-miR-4448	miR-4448 (miRNAs w/seed GCUCCUU)	2,738	TargetScan Human	High (predicted)	ATF1	ATF1	-2,434	ATM Signaling,CD40 Signaling,Dopamine-DARPP32 Feedback in cAMP Signaling,ERK/MAPK Signaling,LPS-stimulated MAPK Signaling,MAPK targets/ Nuclear events mediated by MAP kinases,NGF-stimulated transcription,p38 MAPK Signaling,PI3K Signaling in B Lymphocytes,Protein Kinase A Signaling,Role of BRCA1 in DNA Damage Response,Signaling by NTRK1 (TRKA)
hsa-miR-214-3p	miR-214-3p (and other miRNAs w/seed CAGCAGG)	-4,894	TargetScan Human	High (predicted)	ATF2	ATF2	-3,907	4-1BB Signaling in T Lymphocytes,Acetylcholine Receptor Signaling Pathway,Activation of IRF by Cytosolic Pattern Recognition Receptors,Activin Inhibin Signaling Pathway,AMPK Signaling,ATM Signaling,Autophagy,B Cell Receptor Signaling,BMP signaling pathway,Breast Cancer Regulation by Stathmin1,Calcium Signaling,cAMP-mediated signaling,Cardiac Hypertrophy Signaling,Cardiac Hypertrophy Signaling (En…
hsa-miR-3613-5p	miR-3613-5p (miRNAs w/seed GUUGUAC)	-24,471	TargetScan Human	High (predicted)	ATF2	ATF2	-3,907	4-1BB Signaling in T Lymphocytes,Acetylcholine Receptor Signaling Pathway,Activation of IRF by Cytosolic Pattern Recognition Receptors,Activin Inhibin Signaling Pathway,AMPK Signaling,ATM Signaling,Autophagy,B Cell Receptor Signaling,BMP signaling pathway,Breast Cancer Regulation by Stathmin1,Calcium Signaling,cAMP-mediated signaling,Cardiac Hypertrophy Signaling,Cardiac Hypertrophy Signaling (En…
hsa-miR-376c-5p	miR-376b-5p (and other miRNAs w/seed GUGGAUA)	-24,471	TargetScan Human	High (predicted)	ATF2	ATF2	-3,907	4-1BB Signaling in T Lymphocytes,Acetylcholine Receptor Signaling Pathway,Activation of IRF by Cytosolic Pattern Recognition Receptors,Activin Inhibin Signaling Pathway,AMPK Signaling,ATM Signaling,Autophagy,B Cell Receptor Signaling,BMP signaling pathway,Breast Cancer Regulation by Stathmin1,Calcium Signaling,cAMP-mediated signaling,Cardiac Hypertrophy Signaling,Cardiac Hypertrophy Signaling (En…
hsa-miR-181a-2-3p	miR-181a-2-3p (and other miRNAs w/seed CCACUGA)	-24,471	TargetScan Human	High (predicted)	ATF3	ATF3	3,657	ATF4 activates genes in response to endoplasmic reticulum stress,EIF2 Signaling,Endocannabinoid Cancer Inhibition Pathway,ID1 Signaling Pathway,PI3K Signaling in B Lymphocytes,Response of EIF2AK1 (HRI) to heme deficiency,Response of EIF2AK4 (GCN2) to amino acid deficiency,Role of PKR in Interferon Induction and Antiviral Response,Senescence Pathway
hsa-miR-214-3p	miR-214-3p (and other miRNAs w/seed CAGCAGG)	-4,894	TargetScan Human	High (predicted)	ATG12	ATG12	7,403	Autophagy,DDX58/IFIH1-mediated induction of interferon-alpha/beta,Immunogenic Cell Death Signaling Pathway,Macroautophagy,Mitophagy,Sirtuin Signaling Pathway
hsa-miR-376c-3p	miR-376c-3p (and other miRNAs w/seed ACAUAGA)	-4,079	TargetScan Mouse,TargetScan Human	High (predicted),Moderate (predicted)	ATG12	ATG12	7,403	Autophagy,DDX58/IFIH1-mediated induction of interferon-alpha/beta,Immunogenic Cell Death Signaling Pathway,Macroautophagy,Mitophagy,Sirtuin Signaling Pathway
hsa-miR-625-5p	miR-625-5p (and other miRNAs w/seed GGGGGAA)	-8,157	TargetScan Human	High (predicted)	ATMIN	ATMIN	4,278	Role of CHK Proteins in Cell Cycle Checkpoint Control
hsa-miR-625-5p	miR-625-5p (and other miRNAs w/seed GGGGGAA)	-8,157	TargetScan Mouse,TargetScan Human	High (predicted),Moderate (predicted)	ATP2A1	ATP2A1	-20,989	Apelin Cardiomyocyte Signaling Pathway,Calcium Signaling,Calcium Transport I,Calcium-induced T Lymphocyte Apoptosis,Cardiac conduction,Cardiac Hypertrophy Signaling (Enhanced),Cardiac β-adrenergic Signaling,Dopamine-DARPP32 Feedback in cAMP Signaling,Eicosanoid Signaling,Ion channel transport,Nitric Oxide Signaling in the Cardiovascular System,Pancreatic Secretion Signaling Pathway,Platelet homeo…
hsa-miR-214-3p	miR-214-3p (and other miRNAs w/seed CAGCAGG)	-4,894	Ingenuity Expert Findings,TargetScan Human	Experimentally Observed,Moderate (predicted)	ATP2A2	ATP2A2	-3,408	Apelin Cardiomyocyte Signaling Pathway,Calcium Signaling,Calcium Transport I,Calcium-induced T Lymphocyte Apoptosis,Cardiac conduction,Cardiac Hypertrophy Signaling (Enhanced),Cardiac β-adrenergic Signaling,Dilated Cardiomyopathy Signaling Pathway,Dopamine-DARPP32 Feedback in cAMP Signaling,Eicosanoid Signaling,Ion channel transport,NAFLD Signaling Pathway,Nitric Oxide Signaling in the Cardiovasc…
hsa-miR-329-3p	miR-329-3p (and other miRNAs w/seed ACACACC)	-12,236	TargetScan Human	High (predicted)	ATP2A2	ATP2A2	-3,408	Apelin Cardiomyocyte Signaling Pathway,Calcium Signaling,Calcium Transport I,Calcium-induced T Lymphocyte Apoptosis,Cardiac conduction,Cardiac Hypertrophy Signaling (Enhanced),Cardiac β-adrenergic Signaling,Dilated Cardiomyopathy Signaling Pathway,Dopamine-DARPP32 Feedback in cAMP Signaling,Eicosanoid Signaling,Ion channel transport,NAFLD Signaling Pathway,Nitric Oxide Signaling in the Cardiovasc…
hsa-miR-625-5p	miR-625-5p (and other miRNAs w/seed GGGGGAA)	-8,157	TargetScan Human	High (predicted)	ATP2B4	ATP2B4	167,419	Calcium Signaling,Calcium Transport I,Cardiac conduction,Ion channel transport,Oxytocin Signaling Pathway,Pancreatic Secretion Signaling Pathway,Platelet homeostasis
hsa-miR-382-5p	miR-382-5p (miRNAs w/seed AAGUUGU)	-1,631	TargetScan Mouse,TargetScan Human	High (predicted)	ATP5F1C	ATP5F1C	-3,534	Cristae formation,Electron transport, ATP synthesis, and heat production by uncoupling proteins,Estrogen Receptor Signaling,Glucocorticoid Receptor Signaling,Huntington's Disease Signaling,Mitochondrial Dysfunction,Neutrophil Extracellular Trap Signaling Pathway,Oxidative Phosphorylation,S100 Family Signaling Pathway,Sirtuin Signaling Pathway
hsa-miR-3152-5p	miR-3152-5p (miRNAs w/seed UUGCCUC)	-24,471	TargetScan Human	High (predicted)	ATP5F1E	ATP5F1E	5,646	Cristae formation,Electron transport, ATP synthesis, and heat production by uncoupling proteins,Estrogen Receptor Signaling,Glucocorticoid Receptor Signaling,Huntington's Disease Signaling,Mitochondrial Dysfunction,Neutrophil Extracellular Trap Signaling Pathway,Oxidative Phosphorylation,S100 Family Signaling Pathway,Sirtuin Signaling Pathway
hsa-miR-3187-3p	miR-3187-3p (miRNAs w/seed UGGCCAU)	-24,471	TargetScan Human	High (predicted)	ATP5F1E	ATP5F1E	5,646	Cristae formation,Electron transport, ATP synthesis, and heat production by uncoupling proteins,Estrogen Receptor Signaling,Glucocorticoid Receptor Signaling,Huntington's Disease Signaling,Mitochondrial Dysfunction,Neutrophil Extracellular Trap Signaling Pathway,Oxidative Phosphorylation,S100 Family Signaling Pathway,Sirtuin Signaling Pathway
hsa-miR-501-5p	miR-501-5p (miRNAs w/seed AUCCUUU)	-24,471	TargetScan Human	High (predicted)	ATP5F1E	ATP5F1E	5,646	Cristae formation,Electron transport, ATP synthesis, and heat production by uncoupling proteins,Estrogen Receptor Signaling,Glucocorticoid Receptor Signaling,Huntington's Disease Signaling,Mitochondrial Dysfunction,Neutrophil Extracellular Trap Signaling Pathway,Oxidative Phosphorylation,S100 Family Signaling Pathway,Sirtuin Signaling Pathway
hsa-miR-193b-3p	miR-193a-3p (and other miRNAs w/seed ACUGGCC)	-12,236	TargetScan Mouse,TargetScan Human	High (predicted),Moderate (predicted)	ATP5PB	ATP5PB	2,707	Cristae formation,Electron transport, ATP synthesis, and heat production by uncoupling proteins,Estrogen Receptor Signaling,Glucocorticoid Receptor Signaling,Huntington's Disease Signaling,Mitochondrial Dysfunction,Neutrophil Extracellular Trap Signaling Pathway,Oxidative Phosphorylation,Sirtuin Signaling Pathway
hsa-miR-625-5p	miR-625-5p (and other miRNAs w/seed GGGGGAA)	-8,157	TargetScan Human	High (predicted)	ATP6V0B	ATP6V0B	1,977	Adrenergic Receptor Signaling Pathway (Enhanced),Amino acids regulate mTORC1,CGAS-STING Signaling Pathway,Chaperone Mediated Autophagy Signaling Pathway,CLEAR Signaling Pathway,Ion channel transport,Iron homeostasis signaling pathway,Iron uptake and transport,Orexin Signaling Pathway,Phagosome Maturation,Role of MAPK Signaling in Promoting the Pathogenesis of Influenza,Signaling by Insulin recept…
hsa-miR-431-5p	miR-431-5p (and other miRNAs w/seed GUCUUGC)	-6,118	TargetScan Human	High (predicted)	ATP6V0E1	ATP6V0E1	5,201	Adrenergic Receptor Signaling Pathway (Enhanced),Amino acids regulate mTORC1,CGAS-STING Signaling Pathway,Chaperone Mediated Autophagy Signaling Pathway,CLEAR Signaling Pathway,Ion channel transport,Iron homeostasis signaling pathway,Iron uptake and transport,Orexin Signaling Pathway,Phagosome Maturation,Role of MAPK Signaling in Promoting the Pathogenesis of Influenza,Signaling by Insulin recept…
hsa-miR-214-3p	miR-214-3p (and other miRNAs w/seed CAGCAGG)	-4,894	TargetScan Mouse,TargetScan Human	High (predicted)	ATP6V0E2	ATP6V0E2	91,618	Adrenergic Receptor Signaling Pathway (Enhanced),Amino acids regulate mTORC1,CGAS-STING Signaling Pathway,Chaperone Mediated Autophagy Signaling Pathway,CLEAR Signaling Pathway,Ion channel transport,Iron homeostasis signaling pathway,Iron uptake and transport,Orexin Signaling Pathway,Phagosome Maturation,Role of MAPK Signaling in Promoting the Pathogenesis of Influenza,Signaling by Insulin recept…
hsa-miR-485-5p	miR-485-5p (and other miRNAs w/seed GAGGCUG)	-4,079	TargetScan Human	High (predicted)	ATP6V0E2	ATP6V0E2	91,618	Adrenergic Receptor Signaling Pathway (Enhanced),Amino acids regulate mTORC1,CGAS-STING Signaling Pathway,Chaperone Mediated Autophagy Signaling Pathway,CLEAR Signaling Pathway,Ion channel transport,Iron homeostasis signaling pathway,Iron uptake and transport,Orexin Signaling Pathway,Phagosome Maturation,Role of MAPK Signaling in Promoting the Pathogenesis of Influenza,Signaling by Insulin recept…
hsa-miR-379-3p	miR-411-3p (and other miRNAs w/seed AUGUAAC)	-2,039	TargetScan Human	High (predicted)	ATP6V1H	ATP6V1H	-4,669	Adrenergic Receptor Signaling Pathway (Enhanced),Amino acids regulate mTORC1,CGAS-STING Signaling Pathway,Chaperone Mediated Autophagy Signaling Pathway,CLEAR Signaling Pathway,Ion channel transport,Iron homeostasis signaling pathway,Iron uptake and transport,Orexin Signaling Pathway,Phagosome Maturation,Role of MAPK Signaling in Promoting the Pathogenesis of Influenza,Signaling by Insulin recept…
hsa-miR-377-3p	miR-377-3p (miRNAs w/seed UCACACA)	-24,471	TargetScan Human	High (predicted)	ATP9A	ATP9A	212,254	Ion channel transport
hsa-miR-3613-5p	miR-3613-5p (miRNAs w/seed GUUGUAC)	-24,471	TargetScan Human	High (predicted)	ATR	ATR	-5,775	Aryl Hydrocarbon Receptor Signaling,ATM Signaling,Autophagy,Cell Cycle Checkpoints,Cell Cycle: G1/S Checkpoint Regulation,Cell Cycle: G2/M DNA Damage Checkpoint Regulation,Cellular response to heat stress,Cyclins and Cell Cycle Regulation,DNA damage-induced 14-3-3σ Signaling,Fanconi Anemia Pathway,GADD45 Signaling,HDR through Homologous Recombination (HRR) or Single Strand Annealing (SSA),Heredit…
hsa-miR-432-5p	miR-432 (and other miRNAs w/seed CUUGGAG)	-24,471	TargetScan Mouse,TargetScan Human	High (predicted),Moderate (predicted)	AXL	AXL	16,453	IL-15 Production,Necroptosis Signaling Pathway,Pulmonary Fibrosis Idiopathic Signaling Pathway,Signaling by VEGF,Sperm Motility
hsa-miR-155-5p	miR-155-5p (miRNAs w/seed UAAUGCU)	2,493	TargetScan Mouse,Ingenuity Expert Findings,TarBase,TargetScan Human,miRecords	Experimentally Observed,High (predicted),Moderate (predicted)	BACH1	BACH1	3,698	Cytoprotection by HMOX1,Heme signaling,KEAP1-NFE2L2 pathway,NFE2L2 regulating anti-oxidant/detoxification enzymes,NRF2-mediated Oxidative Stress Response
hsa-miR-127-3p	miR-127-3p (miRNAs w/seed CGGAUCC)	50,550	TargetScan Human	High (predicted)	BAD	BAD	11,005	14-3-3-mediated Signaling,Acute Myeloid Leukemia Signaling,Adrenomedullin signaling pathway,Angiopoietin Signaling,Apoptosis Signaling,Autophagy,B Cell Receptor Signaling,BEX2 Signaling Pathway,Ceramide Signaling,Chronic Myeloid Leukemia Signaling,Colorectal Cancer Metastasis Signaling,Dilated Cardiomyopathy Signaling Pathway,DNA damage-induced 14-3-3σ Signaling,Docosahexaenoic Acid (DHA) Signali…
hsa-miR-625-5p	miR-625-5p (and other miRNAs w/seed GGGGGAA)	-8,157	TargetScan Human	High (predicted)	BAK1	BAK1	4,379	Apoptosis Signaling,BEX2 Signaling Pathway,IL-7 Signaling Pathway,Immunogenic Cell Death Signaling Pathway,Induction of Apoptosis by HIV1,Interferon Signaling,Intrinsic Pathway for Apoptosis,Molecular Mechanisms of Cancer,NAFLD Signaling Pathway,Pyroptosis
hsa-miR-181a-2-3p	miR-181a-2-3p (and other miRNAs w/seed CCACUGA)	-24,471	TargetScan Mouse,TargetScan Human	High (predicted),Moderate (predicted)	BASP1	BASP1	238,553	RHO GTPase cycle
hsa-miR-2116-3p	miR-2116-3p (miRNAs w/seed CUCCCAU)	-24,471	TargetScan Human	High (predicted)	BASP1	BASP1	238,553	RHO GTPase cycle
hsa-miR-493-5p	miR-493-5p (miRNAs w/seed UGUACAU)	-24,471	TargetScan Mouse,TargetScan Human	High (predicted),Moderate (predicted)	BASP1	BASP1	238,553	RHO GTPase cycle
hsa-miR-214-3p	miR-214-3p (and other miRNAs w/seed CAGCAGG)	-4,894	TargetScan Human	High (predicted)	BAX	BAX	-2,412	14-3-3-mediated Signaling,Adrenomedullin signaling pathway,Amyotrophic Lateral Sclerosis Signaling,Apoptosis Signaling,Aryl Hydrocarbon Receptor Signaling,CGAS-STING Signaling Pathway,Colorectal Cancer Metastasis Signaling,Coronavirus Pathogenesis Pathway,Dilated Cardiomyopathy Signaling Pathway,Docosahexaenoic Acid (DHA) Signaling,Hepatic Fibrosis / Hepatic Stellate Cell Activation,HEY1 Signalin…
hsa-miR-455-3p	miR-455-3p (miRNAs w/seed CAGUCCA)	-3,496	TargetScan Mouse,TargetScan Human	High (predicted),Moderate (predicted)	BAX	BAX	-2,412	14-3-3-mediated Signaling,Adrenomedullin signaling pathway,Amyotrophic Lateral Sclerosis Signaling,Apoptosis Signaling,Aryl Hydrocarbon Receptor Signaling,CGAS-STING Signaling Pathway,Colorectal Cancer Metastasis Signaling,Coronavirus Pathogenesis Pathway,Dilated Cardiomyopathy Signaling Pathway,Docosahexaenoic Acid (DHA) Signaling,Hepatic Fibrosis / Hepatic Stellate Cell Activation,HEY1 Signalin…
hsa-let-7a-2-3p	let-7a-2-3p (and other miRNAs w/seed UGUACAG)	2,248	TargetScan Mouse,TargetScan Human	High (predicted)	BBC3	BBC3	3,014	BEX2 Signaling Pathway,Chaperone Mediated Autophagy Signaling Pathway,FOXO-mediated transcription of cell death genes,Induction of Apoptosis by HIV1,Intrinsic Pathway for Apoptosis,Mitochondrial Dysfunction,Molecular Mechanisms of Cancer,MYC Mediated Apoptosis Signaling,NAFLD Signaling Pathway,p53 Signaling,Pulmonary Fibrosis Idiopathic Signaling Pathway,TP53 Regulates Transcription of Cell Death…
hsa-miR-149-5p	miR-149-5p (miRNAs w/seed CUGGCUC)	16,673	TargetScan Mouse,TargetScan Human	High (predicted),Moderate (predicted)	BBC3	BBC3	3,014	BEX2 Signaling Pathway,Chaperone Mediated Autophagy Signaling Pathway,FOXO-mediated transcription of cell death genes,Induction of Apoptosis by HIV1,Intrinsic Pathway for Apoptosis,Mitochondrial Dysfunction,Molecular Mechanisms of Cancer,MYC Mediated Apoptosis Signaling,NAFLD Signaling Pathway,p53 Signaling,Pulmonary Fibrosis Idiopathic Signaling Pathway,TP53 Regulates Transcription of Cell Death…
hsa-miR-329-3p	miR-329-3p (and other miRNAs w/seed ACACACC)	-12,236	TargetScan Human	High (predicted)	BCAP31	BCAP31	2,025	Apoptotic execution phase,Class I MHC mediated antigen processing and presentation,Immunogenic Cell Death Signaling Pathway,p70S6K Signaling,RHO GTPase cycle
hsa-miR-625-5p	miR-625-5p (and other miRNAs w/seed GGGGGAA)	-8,157	TargetScan Human	High (predicted)	BCAP31	BCAP31	2,025	Apoptotic execution phase,Class I MHC mediated antigen processing and presentation,Immunogenic Cell Death Signaling Pathway,p70S6K Signaling,RHO GTPase cycle
hsa-miR-485-5p	miR-485-5p (and other miRNAs w/seed GAGGCUG)	-4,079	TargetScan Human	High (predicted)	BCL10	BCL10	4,760	B Cell Receptor Signaling,C-type lectin receptors (CLRs),CD28 Signaling in T Helper Cells,CTLA4 Signaling in Cytotoxic T Lymphocytes,E3 ubiquitin ligases ubiquitinate target proteins,Fc epsilon receptor (FCERI) signaling,NF-κB Signaling,Phagosome Formation,PI3K Signaling in B Lymphocytes,PKCθ Signaling in T Lymphocytes,Regulation of IL-2 Expression in Activated and Anergic T Lymphocytes,Signaling…
hsa-miR-149-5p	miR-149-5p (miRNAs w/seed CUGGCUC)	16,673	TargetScan Mouse,TargetScan Human	High (predicted),Moderate (predicted)	BCL2L11	BCL2L11	4,503	Apoptosis Signaling,Chronic Myeloid Leukemia Signaling,Coronavirus Pathogenesis Pathway,FLT3 Signaling,FOXO-mediated transcription of cell death genes,Glucocorticoid Receptor Signaling,HER-2 Signaling in Breast Cancer,Intrinsic Pathway for Apoptosis,Molecular Mechanisms of Cancer,MYC Mediated Apoptosis Signaling,NAFLD Signaling Pathway,p75 NTR receptor-mediated signalling,Polyamine Regulation in …
hsa-miR-193a-5p	miR-193a-5p (miRNAs w/seed GGGUCUU)	-24,471	TargetScan Human	High (predicted)	BCL2L11	BCL2L11	4,503	Apoptosis Signaling,Chronic Myeloid Leukemia Signaling,Coronavirus Pathogenesis Pathway,FLT3 Signaling,FOXO-mediated transcription of cell death genes,Glucocorticoid Receptor Signaling,HER-2 Signaling in Breast Cancer,Intrinsic Pathway for Apoptosis,Molecular Mechanisms of Cancer,MYC Mediated Apoptosis Signaling,NAFLD Signaling Pathway,p75 NTR receptor-mediated signalling,Polyamine Regulation in …
hsa-miR-92b-3p	miR-92a-3p (and other miRNAs w/seed AUUGCAC)	76,008	TargetScan Mouse,Ingenuity Expert Findings,TargetScan Human,miRecords	Experimentally Observed,Moderate (predicted)	BCL2L11	BCL2L11	4,503	Apoptosis Signaling,Chronic Myeloid Leukemia Signaling,Coronavirus Pathogenesis Pathway,FLT3 Signaling,FOXO-mediated transcription of cell death genes,Glucocorticoid Receptor Signaling,HER-2 Signaling in Breast Cancer,Intrinsic Pathway for Apoptosis,Molecular Mechanisms of Cancer,MYC Mediated Apoptosis Signaling,NAFLD Signaling Pathway,p75 NTR receptor-mediated signalling,Polyamine Regulation in …
hsa-miR-329-3p	miR-329-3p (and other miRNAs w/seed ACACACC)	-12,236	TargetScan Mouse,TargetScan Human	High (predicted),Moderate (predicted)	BCL9	BCL9	-9,229	Autism Signaling Pathway,Regulation of the Epithelial Mesenchymal Transition in Development Pathway,Regulation of the Epithelial-Mesenchymal Transition Pathway,TCF dependent signaling in response to WNT,WNT/β-catenin Signaling
hsa-miR-625-5p	miR-625-5p (and other miRNAs w/seed GGGGGAA)	-8,157	TargetScan Human	High (predicted)	BCL9	BCL9	-9,229	Autism Signaling Pathway,Regulation of the Epithelial Mesenchymal Transition in Development Pathway,Regulation of the Epithelial-Mesenchymal Transition Pathway,TCF dependent signaling in response to WNT,WNT/β-catenin Signaling
hsa-miR-216a-5p	miR-216a-5p (miRNAs w/seed AAUCUCA)	-12,236	TargetScan Human	High (predicted)	BECN1	BECN1	-3,029	Autophagy,Cachexia Signaling Pathway,Class I MHC mediated antigen processing and presentation,CLEAR Signaling Pathway,Deubiquitination,Ferroptosis Signaling Pathway,IL-27 Signaling Pathway,Immunogenic Cell Death Signaling Pathway,ISGylation Signaling Pathway,Macroautophagy,Mitochondrial Dysfunction,Role of MAPK Signaling in Promoting the Pathogenesis of Influenza,Sirtuin Signaling Pathway
hsa-miR-149-5p	miR-149-5p (miRNAs w/seed CUGGCUC)	16,673	TargetScan Mouse,TargetScan Human	High (predicted)	BET1L	BET1L	18,158	COPI-mediated anterograde transport,Glutaminergic Receptor Signaling Pathway (Enhanced),Huntington's Disease Signaling,Insulin Secretion Signaling Pathway,Intra-Golgi and retrograde Golgi-to-ER traffic,Netrin Signaling,Pancreatic Secretion Signaling Pathway,Phagosome Maturation,SNARE Signaling Pathway,Synaptogenesis Signaling Pathway,Tight Junction Signaling
hsa-miR-625-5p	miR-625-5p (and other miRNAs w/seed GGGGGAA)	-8,157	TargetScan Human	High (predicted)	BET1L	BET1L	18,158	COPI-mediated anterograde transport,Glutaminergic Receptor Signaling Pathway (Enhanced),Huntington's Disease Signaling,Insulin Secretion Signaling Pathway,Intra-Golgi and retrograde Golgi-to-ER traffic,Netrin Signaling,Pancreatic Secretion Signaling Pathway,Phagosome Maturation,SNARE Signaling Pathway,Synaptogenesis Signaling Pathway,Tight Junction Signaling
hsa-miR-216a-5p	miR-216a-5p (miRNAs w/seed AAUCUCA)	-12,236	TargetScan Human	High (predicted)	BEX3	BEX3	2,447	p75 NTR receptor-mediated signalling
hsa-miR-204-5p	miR-204-5p (and other miRNAs w/seed UCCCUUU)	85,448	TargetScan Human	High (predicted)	BIRC2	BIRC2	3,758	Amyotrophic Lateral Sclerosis Signaling,Apoptosis Signaling,Apoptotic execution phase,Death Receptor Signaling,Deubiquitination,Erythropoietin Signaling Pathway,Induction of Apoptosis by HIV1,Lymphotoxin β Receptor Signaling,Molecular Mechanisms of Cancer,MyD88-independent TLR4 cascade,Necroptosis Signaling Pathway,Neuroinflammation Signaling Pathway,NLR signaling pathways,NOD1/2 Signaling Pathwa…
hsa-miR-3130-5p	miR-3130-5p (and other miRNAs w/seed ACCCAGU)	-24,471	TargetScan Human	High (predicted)	BLOC1S3	BLOC1S3	13,748	CLEAR Signaling Pathway,trans-Golgi Network Vesicle Budding
hsa-miR-137-3p	miR-137-3p (miRNAs w/seed UAUUGCU)	-8,157	TargetScan Human	High (predicted)	BLOC1S5	BLOC1S5	63,590	trans-Golgi Network Vesicle Budding
hsa-miR-181a-2-3p	miR-181a-2-3p (and other miRNAs w/seed CCACUGA)	-24,471	TargetScan Human	High (predicted)	BLOC1S5	BLOC1S5	63,590	trans-Golgi Network Vesicle Budding
hsa-miR-2682-3p	miR-2682-3p (and other miRNAs w/seed GCCUCUU)	-24,471	TargetScan Human	High (predicted)	BLOC1S6	BLOC1S6	7,962	trans-Golgi Network Vesicle Budding
hsa-miR-625-5p	miR-625-5p (and other miRNAs w/seed GGGGGAA)	-8,157	TargetScan Human	High (predicted)	BMF	BMF	255,880	Intrinsic Pathway for Apoptosis
hsa-miR-625-5p	miR-625-5p (and other miRNAs w/seed GGGGGAA)	-8,157	TargetScan Human	High (predicted)	BRD4	BRD4	-2,240	Hepatic Fibrosis Signaling Pathway,HOTAIR Regulatory Pathway
hsa-miR-485-5p	miR-485-5p (and other miRNAs w/seed GAGGCUG)	-4,079	TargetScan Human	High (predicted)	BSG	BSG	78,736	Aspirin ADME,Cell surface interactions at the vascular wall,Degradation of the extracellular matrix,Integrin cell surface interactions,S100 Family Signaling Pathway,The citric acid (TCA) cycle and respiratory electron transport,Transport of bile salts and organic acids, metal ions and amine compounds
hsa-miR-381-3p	miR-381-3p (and other miRNAs w/seed AUACAAG)	-12,236	TargetScan Human	High (predicted)	BST1	BST1	-3,517	NAD Signaling Pathway,Neutrophil degranulation,Nicotinate metabolism,Pancreatic Secretion Signaling Pathway,Serotonin Receptor Signaling
hsa-miR-454-3p	miR-130a-3p (and other miRNAs w/seed AGUGCAA)	-24,471	TargetScan Mouse,TargetScan Human	High (predicted)	BTG1	BTG1	-5,571	Cell Cycle Regulation by BTG Family Proteins,FOXO-mediated transcription of cell cycle genes
hsa-miR-424-3p	miR-424-3p (miRNAs w/seed AAAACGU)	-12,236	TargetScan Human	High (predicted)	BTG1	BTG1	-5,571	Cell Cycle Regulation by BTG Family Proteins,FOXO-mediated transcription of cell cycle genes
hsa-miR-495-3p	miR-495-3p (and other miRNAs w/seed AACAAAC)	-12,236	Ingenuity Expert Findings,TargetScan Human	Experimentally Observed,Moderate (predicted)	BUB1	BUB1	-58,121	Cell Cycle Checkpoints,Kinetochore Metaphase Signaling Pathway,Mitotic Metaphase and Anaphase,Mitotic Prometaphase,RHO GTPases Activate Formins
hsa-miR-377-3p	miR-377-3p (miRNAs w/seed UCACACA)	-24,471	TargetScan Human	High (predicted)	C1D	C1D	-3,170	Major pathway of rRNA processing in the nucleolus and cytosol
hsa-miR-1180-3p	miR-1180-3p (miRNAs w/seed UUCCGGC)	-2,225	TargetScan Human	High (predicted)	C6orf120	C6orf120	8,448	Neutrophil degranulation
hsa-miR-654-5p	miR-541-3p (and other miRNAs w/seed GGUGGGC)	-12,236	TargetScan Human	High (predicted)	CABIN1	CABIN1	-2,257	Calcium Signaling,Calcium-induced T Lymphocyte Apoptosis,DNA Damage/Telomere Stress Induced Senescence,NUR77 Signaling in T Lymphocytes,Role of NFAT in Cardiac Hypertrophy,Role of NFAT in Regulation of the Immune Response
hsa-miR-197-3p	miR-197-3p (and other miRNAs w/seed UCACCAC)	-2,039	TargetScan Human	High (predicted)	CACNG8	CACNG8	11,356	Acetylcholine Receptor Signaling Pathway,Adrenergic Receptor Signaling Pathway (Enhanced),Amyotrophic Lateral Sclerosis Signaling,Androgen Signaling,Autism Signaling Pathway,Calcium Signaling,Cardiac conduction,Cardiac Hypertrophy Signaling,Cardiac Hypertrophy Signaling (Enhanced),Cardiac β-adrenergic Signaling,CCR5 Signaling in Macrophages,Cellular Effects of Sildenafil (Viagra),Circadian Rhythm…
hsa-miR-454-3p	miR-130a-3p (and other miRNAs w/seed AGUGCAA)	-24,471	TargetScan Human	High (predicted)	CALM2	CALM1 (includes others)	-3,380	Acetylcholine Receptor Signaling Pathway,Activation of kainate receptors upon glutamate binding,Activation of NMDA receptors and postsynaptic events,Adrenomedullin signaling pathway,Androgen Signaling,Apelin Endothelial Signaling Pathway,Autophagy,B Cell Receptor Signaling,Beta-catenin independent WNT signaling,C-type lectin receptors (CLRs),Calcium Signaling,Calcium-induced T Lymphocyte Apoptosi…
hsa-miR-193b-3p	miR-193a-3p (and other miRNAs w/seed ACUGGCC)	-12,236	TargetScan Human	High (predicted)	CALM2	CALM1 (includes others)	-3,380	Acetylcholine Receptor Signaling Pathway,Activation of kainate receptors upon glutamate binding,Activation of NMDA receptors and postsynaptic events,Adrenomedullin signaling pathway,Androgen Signaling,Apelin Endothelial Signaling Pathway,Autophagy,B Cell Receptor Signaling,Beta-catenin independent WNT signaling,C-type lectin receptors (CLRs),Calcium Signaling,Calcium-induced T Lymphocyte Apoptosi…
hsa-miR-660-5p	miR-660-5p (and other miRNAs w/seed ACCCAUU)	-24,471	TargetScan Human	High (predicted)	CALM2	CALM1 (includes others)	-3,380	Acetylcholine Receptor Signaling Pathway,Activation of kainate receptors upon glutamate binding,Activation of NMDA receptors and postsynaptic events,Adrenomedullin signaling pathway,Androgen Signaling,Apelin Endothelial Signaling Pathway,Autophagy,B Cell Receptor Signaling,Beta-catenin independent WNT signaling,C-type lectin receptors (CLRs),Calcium Signaling,Calcium-induced T Lymphocyte Apoptosi…
hsa-miR-204-5p	miR-204-5p (and other miRNAs w/seed UCCCUUU)	85,448	TargetScan Mouse,TargetScan Human	High (predicted)	CAMK1	CAMK1	-2,832	Activation of NMDA receptors and postsynaptic events,Breast Cancer Regulation by Stathmin1,Calcium Signaling,cAMP-mediated signaling,Chemokine Signaling,Dilated Cardiomyopathy Signaling Pathway,Glioma Signaling,HIF1α Signaling,Neuropathic Pain Signaling in Dorsal Horn Neurons,Opioid Signaling Pathway,Role of NFAT in Cardiac Hypertrophy,Thrombin Signaling,Xenobiotic Metabolism Signaling
hsa-miR-432-5p	miR-432 (and other miRNAs w/seed CUUGGAG)	-24,471	TargetScan Human	High (predicted)	CARD8	CARD8	475,972	Intrinsic Pathway for Apoptosis
hsa-miR-374a-5p	miR-374b-5p (and other miRNAs w/seed UAUAAUA)	-12,236	TargetScan Human	High (predicted)	CASP12	CASP12	6,498	Acetylcholine Receptor Signaling Pathway,Amyotrophic Lateral Sclerosis Signaling,Apoptosis Signaling,Cachexia Signaling Pathway,DNA damage-induced 14-3-3σ Signaling,Endocannabinoid Cancer Inhibition Pathway,Endoplasmic Reticulum Stress Pathway,Endothelin-1 Signaling,Huntington's Disease Signaling,IL-33 Signaling Pathway,Neutrophil Extracellular Trap Signaling Pathway,NOD1/2 Signaling Pathway,Oste…
hsa-miR-376a-3p	miR-376a-3p (and other miRNAs w/seed UCAUAGA)	-4,894	TargetScan Human	High (predicted)	CASP12	CASP12	6,498	Acetylcholine Receptor Signaling Pathway,Amyotrophic Lateral Sclerosis Signaling,Apoptosis Signaling,Cachexia Signaling Pathway,DNA damage-induced 14-3-3σ Signaling,Endocannabinoid Cancer Inhibition Pathway,Endoplasmic Reticulum Stress Pathway,Endothelin-1 Signaling,Huntington's Disease Signaling,IL-33 Signaling Pathway,Neutrophil Extracellular Trap Signaling Pathway,NOD1/2 Signaling Pathway,Oste…
hsa-miR-137-3p	miR-137-3p (miRNAs w/seed UAUUGCU)	-8,157	TargetScan Human	High (predicted)	CASP3	CASP3	4,029	Acetylcholine Receptor Signaling Pathway,Adrenomedullin signaling pathway,Amyotrophic Lateral Sclerosis Signaling,Apoptosis Signaling,Apoptotic execution phase,BAG2 Signaling Pathway,Cachexia Signaling Pathway,Caspase activation via Dependence Receptors in the absence of ligand,CD27 Signaling in Lymphocytes,Colorectal Cancer Metastasis Signaling,Coronavirus Pathogenesis Pathway,Cytotoxic T Lympho…
hsa-miR-3152-5p	miR-3152-5p (miRNAs w/seed UUGCCUC)	-24,471	TargetScan Human	High (predicted)	CASP3	CASP3	4,029	Acetylcholine Receptor Signaling Pathway,Adrenomedullin signaling pathway,Amyotrophic Lateral Sclerosis Signaling,Apoptosis Signaling,Apoptotic execution phase,BAG2 Signaling Pathway,Cachexia Signaling Pathway,Caspase activation via Dependence Receptors in the absence of ligand,CD27 Signaling in Lymphocytes,Colorectal Cancer Metastasis Signaling,Coronavirus Pathogenesis Pathway,Cytotoxic T Lympho…
hsa-miR-376a-3p	miR-376a-3p (and other miRNAs w/seed UCAUAGA)	-4,894	TargetScan Mouse,TargetScan Human	High (predicted),Moderate (predicted)	CASP3	CASP3	4,029	Acetylcholine Receptor Signaling Pathway,Adrenomedullin signaling pathway,Amyotrophic Lateral Sclerosis Signaling,Apoptosis Signaling,Apoptotic execution phase,BAG2 Signaling Pathway,Cachexia Signaling Pathway,Caspase activation via Dependence Receptors in the absence of ligand,CD27 Signaling in Lymphocytes,Colorectal Cancer Metastasis Signaling,Coronavirus Pathogenesis Pathway,Cytotoxic T Lympho…
hsa-miR-4448	miR-4448 (miRNAs w/seed GCUCCUU)	2,738	TargetScan Human	High (predicted)	CASP4	CASP4	985,510	Acetylcholine Receptor Signaling Pathway,Cachexia Signaling Pathway,DNA damage-induced 14-3-3σ Signaling,Endocannabinoid Cancer Inhibition Pathway,Endothelin-1 Signaling,Huntington's Disease Signaling,IL-33 Signaling Pathway,Neutrophil Extracellular Trap Signaling Pathway,NLR signaling pathways,Osteoarthritis Pathway,Pyroptosis,Pyroptosis Signaling Pathway,Sphingosine-1-phosphate Signaling,System…
hsa-miR-3152-5p	miR-3152-5p (miRNAs w/seed UUGCCUC)	-24,471	TargetScan Human	High (predicted)	CASP9	CASP9	5,175	Acetylcholine Receptor Signaling Pathway,Amyotrophic Lateral Sclerosis Signaling,Angiopoietin Signaling,Apoptosis Signaling,Cachexia Signaling Pathway,Caspase activation via Dependence Receptors in the absence of ligand,CD27 Signaling in Lymphocytes,Chronic Myeloid Leukemia Signaling,Colorectal Cancer Metastasis Signaling,Coronavirus Pathogenesis Pathway,Cytotoxic T Lymphocyte-mediated Apoptosis …
hsa-miR-454-3p	miR-130a-3p (and other miRNAs w/seed AGUGCAA)	-24,471	TargetScan Mouse,TargetScan Human	High (predicted)	CBFB	CBFB	-5,518	ESR-mediated signaling,Regulation of RUNX1 Expression and Activity,Regulation of RUNX2 expression and activity,RUNX1 and FOXP3 control the development of regulatory T lymphocytes (Tregs),RUNX1 regulates megakaryocyte differentiation and platelet function,Transcriptional regulation by RUNX1,Transcriptional regulation by RUNX2,Transcriptional regulation by RUNX3,Transcriptional regulation of granul…
hsa-miR-155-5p	miR-155-5p (miRNAs w/seed UAAUGCU)	2,493	TarBase,TargetScan Human	Experimentally Observed,Moderate (predicted)	CBFB	CBFB	-5,518	ESR-mediated signaling,Regulation of RUNX1 Expression and Activity,Regulation of RUNX2 expression and activity,RUNX1 and FOXP3 control the development of regulatory T lymphocytes (Tregs),RUNX1 regulates megakaryocyte differentiation and platelet function,Transcriptional regulation by RUNX1,Transcriptional regulation by RUNX2,Transcriptional regulation by RUNX3,Transcriptional regulation of granul…
hsa-miR-410-3p	miR-344d-3p (and other miRNAs w/seed AUAUAAC)	-12,236	TargetScan Mouse,TargetScan Human	High (predicted),Moderate (predicted)	CBFB	CBFB	-5,518	ESR-mediated signaling,Regulation of RUNX1 Expression and Activity,Regulation of RUNX2 expression and activity,RUNX1 and FOXP3 control the development of regulatory T lymphocytes (Tregs),RUNX1 regulates megakaryocyte differentiation and platelet function,Transcriptional regulation by RUNX1,Transcriptional regulation by RUNX2,Transcriptional regulation by RUNX3,Transcriptional regulation of granul…
hsa-miR-193b-3p	miR-193a-3p (and other miRNAs w/seed ACUGGCC)	-12,236	TargetScan Human	High (predicted)	CBL	CBL	3,439	14-3-3-mediated Signaling,Cargo recognition for clathrin-mediated endocytosis,Clathrin-mediated endocytosis,Clathrin-mediated Endocytosis Signaling,Ephrin B Signaling,Fcγ Receptor-mediated Phagocytosis in Macrophages and Monocytes,FLT3 Signaling,FLT3 Signaling in Hematopoietic Progenitor Cells,Insulin Receptor Signaling,Interleukin-3, Interleukin-5 and GM-CSF signaling,Interleukin-6 family signal…
hsa-miR-197-3p	miR-197-3p (and other miRNAs w/seed UCACCAC)	-2,039	TargetScan Human	High (predicted)	CBR1	CBR1	3,599	NRF2-mediated Oxidative Stress Response,Synthesis of Prostaglandins (PG) and Thromboxanes (TX)
hsa-miR-654-5p	miR-541-3p (and other miRNAs w/seed GGUGGGC)	-12,236	TargetScan Human	High (predicted)	CBS	CBS/LOC102724560	20,862	Autism Signaling Pathway,Cysteine Biosynthesis III (mammalia),Cysteine Biosynthesis/Homocysteine Degradation,Ferroptosis Signaling Pathway,Folate Signaling Pathway,Selenoamino acid metabolism,Sulfur amino acid metabolism,Superpathway of Methionine Degradation
hsa-miR-654-5p	miR-541-3p (and other miRNAs w/seed GGUGGGC)	-12,236	TargetScan Human	High (predicted)	CBX2	CBX2	3,674	BBSome Signaling Pathway,Oxidative Stress Induced Senescence,PTEN Regulation,Senescence Pathway,SUMOylation of chromatin organization proteins,SUMOylation of DNA damage response and repair proteins,SUMOylation of DNA methylation proteins,SUMOylation of RNA binding proteins,SUMOylation of transcription cofactors,Transcriptional regulation by RUNX1
hsa-miR-2682-3p	miR-2682-3p (and other miRNAs w/seed GCCUCUU)	-24,471	TargetScan Human	High (predicted)	CCDC115	CCDC115	4,276	RHO GTPase cycle
hsa-miR-3152-5p	miR-3152-5p (miRNAs w/seed UUGCCUC)	-24,471	TargetScan Human	High (predicted)	CCDC115	CCDC115	4,276	RHO GTPase cycle
hsa-miR-374a-5p	miR-374b-5p (and other miRNAs w/seed UAUAAUA)	-12,236	TargetScan Human	High (predicted)	CCL2	CCL2	10,721	Agranulocyte Adhesion and Diapedesis,Airway Inflammation in Asthma,Airway Pathology in Chronic Obstructive Pulmonary Disease,Apelin Endothelial Signaling Pathway,ATF4 activates genes in response to endoplasmic reticulum stress,Atherosclerosis Signaling,Autism Signaling Pathway,Cachexia Signaling Pathway,CGAS-STING Signaling Pathway,Chemokine Signaling,Class A/1 (Rhodopsin-like receptors),Coronavi…
hsa-miR-432-5p	miR-432 (and other miRNAs w/seed CUUGGAG)	-24,471	TargetScan Human	High (predicted)	CCN3	CCN3	-9,955	Gap Junction Signaling,IGF-1 Signaling
hsa-miR-376a-3p	miR-376a-3p (and other miRNAs w/seed UCAUAGA)	-4,894	TargetScan Human	High (predicted)	CCNG1	CCNG1	-4,523	p53 Signaling,Regulation of TP53 Expression and Degradation
hsa-miR-3152-5p	miR-3152-5p (miRNAs w/seed UUGCCUC)	-24,471	TargetScan Human	High (predicted)	CCNH	CCNH	-3,333	Adipogenesis pathway,Androgen Signaling,Assembly of RNA Polymerase II Complex,Cyclins and Cell Cycle Regulation,Glucocorticoid Receptor Signaling,Mitotic G1 phase and G1/S transition,Mitotic G2-G2/M phases,mRNA Capping,NER (Nucleotide Excision Repair, Enhanced Pathway),Nucleotide Excision Repair,Nucleotide Excision Repair Pathway,RAR Activation,RNA Polymerase I Transcription,RNA Polymerase II Tra…
hsa-miR-432-5p	miR-432 (and other miRNAs w/seed CUUGGAG)	-24,471	TargetScan Human	High (predicted)	CCNH	CCNH	-3,333	Adipogenesis pathway,Androgen Signaling,Assembly of RNA Polymerase II Complex,Cyclins and Cell Cycle Regulation,Glucocorticoid Receptor Signaling,Mitotic G1 phase and G1/S transition,Mitotic G2-G2/M phases,mRNA Capping,NER (Nucleotide Excision Repair, Enhanced Pathway),Nucleotide Excision Repair,Nucleotide Excision Repair Pathway,RAR Activation,RNA Polymerase I Transcription,RNA Polymerase II Tra…
hsa-miR-455-3p	miR-455-3p (miRNAs w/seed CAGUCCA)	-3,496	TargetScan Human	High (predicted)	CCNH	CCNH	-3,333	Adipogenesis pathway,Androgen Signaling,Assembly of RNA Polymerase II Complex,Cyclins and Cell Cycle Regulation,Glucocorticoid Receptor Signaling,Mitotic G1 phase and G1/S transition,Mitotic G2-G2/M phases,mRNA Capping,NER (Nucleotide Excision Repair, Enhanced Pathway),Nucleotide Excision Repair,Nucleotide Excision Repair Pathway,RAR Activation,RNA Polymerase I Transcription,RNA Polymerase II Tra…
hsa-miR-369-5p	miR-369-5p (miRNAs w/seed GAUCGAC)	4,536	TargetScan Human	High (predicted)	CCT2	CCT2	-6,916	BBSome Signaling Pathway,Cilium Assembly,Neutrophil degranulation,Protein folding,RHO GTPase cycle
hsa-miR-454-3p	miR-130a-3p (and other miRNAs w/seed AGUGCAA)	-24,471	TargetScan Human	High (predicted)	CCT6A	CCT6A	-3,851	BBSome Signaling Pathway,Cilium Assembly,Protein folding,RHO GTPase cycle
hsa-miR-199a-3p	miR-199a-3p (and other miRNAs w/seed CAGUAGU)	-1,224	TargetScan Mouse,TargetScan Human	High (predicted)	CD151	CD151	7,647	Assembly of collagen fibrils and other multimeric structures,Cell junction organization
hsa-miR-130b-5p	miR-130b-5p (and other miRNAs w/seed CUCUUUC)	-1,165	TargetScan Human	High (predicted)	CD200	CD200	-51,407	Immunoregulatory interactions between a Lymphoid and a non-Lymphoid cell,Neuroinflammation Signaling Pathway
hsa-miR-204-5p	miR-204-5p (and other miRNAs w/seed UCCCUUU)	85,448	TargetScan Human	High (predicted)	CD200	CD200	-51,407	Immunoregulatory interactions between a Lymphoid and a non-Lymphoid cell,Neuroinflammation Signaling Pathway
hsa-miR-485-5p	miR-485-5p (and other miRNAs w/seed GAGGCUG)	-4,079	TargetScan Human	High (predicted)	CD200	CD200	-51,407	Immunoregulatory interactions between a Lymphoid and a non-Lymphoid cell,Neuroinflammation Signaling Pathway
hsa-miR-155-5p	miR-155-5p (miRNAs w/seed UAAUGCU)	2,493	TargetScan Mouse,TargetScan Human	High (predicted),Moderate (predicted)	CD274	CD274	44,336	CGAS-STING Signaling Pathway,Costimulation by the CD28 family,Folate Signaling Pathway,IL-27 Signaling Pathway,PD-1, PD-L1 cancer immunotherapy pathway,Signaling by ALK,T Cell Exhaustion Signaling Pathway,Th1 and Th2 Activation Pathway,Th1 Pathway,Tumor Microenvironment Pathway
hsa-miR-199a-3p	miR-199a-3p (and other miRNAs w/seed CAGUAGU)	-1,224	TargetScan Mouse,TargetScan Human	High (predicted)	CD2AP	CD2AP	-4,949	Clathrin-mediated Endocytosis Signaling,Nephrin family interactions,Sertoli Cell-Germ Cell Junction Signaling Pathway (Enhanced)
hsa-miR-590-3p	miR-590-3p (miRNAs w/seed AAUUUUA)	-24,471	TargetScan Human	High (predicted)	CD2AP	CD2AP	-4,949	Clathrin-mediated Endocytosis Signaling,Nephrin family interactions,Sertoli Cell-Germ Cell Junction Signaling Pathway (Enhanced)
hsa-miR-431-5p	miR-431-5p (and other miRNAs w/seed GUCUUGC)	-6,118	TargetScan Mouse,TargetScan Human	High (predicted),Moderate (predicted)	CD34	CD34	-3,912	Agranulocyte Adhesion and Diapedesis,Immunoregulatory interactions between a Lymphoid and a non-Lymphoid cell
hsa-miR-199a-3p	miR-199a-3p (and other miRNAs w/seed CAGUAGU)	-1,224	TargetScan Mouse,Ingenuity Expert Findings,TargetScan Human	Experimentally Observed,Moderate (predicted)	CD44	CD44	21,463	Cell surface interactions at the vascular wall,Degradation of the extracellular matrix,Glioma Invasiveness Signaling,Glycosaminoglycan metabolism,HIPPO signaling,HOTAIR Regulatory Pathway,Integrin cell surface interactions,Interferon gamma signaling,Leukocyte Extravasation Signaling,Neutrophil degranulation,Ovarian Cancer Signaling,RAC Signaling,RHOGDI Signaling,Semaphorin Neuronal Repulsive Sign…
hsa-miR-485-3p	miR-485-3p (and other miRNAs w/seed UCAUACA)	-12,236	TargetScan Human	High (predicted)	CD46	CD46	855,042	Complement cascade,Complement System
hsa-miR-149-5p	miR-149-5p (miRNAs w/seed CUGGCUC)	16,673	TargetScan Human	High (predicted)	CD68	CD68	5,582	Neutrophil degranulation
hsa-miR-214-3p	miR-214-3p (and other miRNAs w/seed CAGCAGG)	-4,894	TargetScan Human	High (predicted)	CDC42SE1	CDC42SE1	3,863	CDC42 Signaling
hsa-miR-130b-5p	miR-130b-5p (and other miRNAs w/seed CUCUUUC)	-1,165	TargetScan Human	High (predicted)	CDC5L	CDC5L	-2,334	Processing of Capped Intron-Containing Pre-mRNA,Spliceosomal Cycle
hsa-miR-493-5p	miR-493-5p (miRNAs w/seed UGUACAU)	-24,471	TargetScan Mouse,TargetScan Human	High (predicted),Moderate (predicted)	CDH11	CDH11	-41,962	Cell junction organization,Gα12/13 Signaling,RHOGDI Signaling,Sertoli Cell-Sertoli Cell Junction Signaling,Signaling by Rho Family GTPases,Synaptogenesis Signaling Pathway
hsa-miR-3130-5p	miR-3130-5p (and other miRNAs w/seed ACCCAGU)	-24,471	TargetScan Human	High (predicted)	CDH18	CDH18	-195,740	Cell junction organization,Gα12/13 Signaling,RHOGDI Signaling,Sertoli Cell-Sertoli Cell Junction Signaling,Signaling by Rho Family GTPases,Synaptogenesis Signaling Pathway
hsa-miR-199a-3p	miR-199a-3p (and other miRNAs w/seed CAGUAGU)	-1,224	TargetScan Mouse,TargetScan Human	High (predicted),Moderate (predicted)	CDK17	CDK17	-3,321	Cell Cycle Control of Chromosomal Replication,DNA Methylation and Transcriptional Repression Signaling
hsa-miR-625-5p	miR-625-5p (and other miRNAs w/seed GGGGGAA)	-8,157	TargetScan Mouse,TargetScan Human	High (predicted),Moderate (predicted)	CDK18	CDK18	-460,839	Cell Cycle Control of Chromosomal Replication,DNA Methylation and Transcriptional Repression Signaling,Pyridoxal 5'-phosphate Salvage Pathway,Salvage Pathways of Pyrimidine Ribonucleotides
hsa-miR-193a-5p	miR-193a-5p (miRNAs w/seed GGGUCUU)	-24,471	TargetScan Human	High (predicted)	CDK8	CDK8	-6,650	Cell Cycle Control of Chromosomal Replication,DNA Methylation and Transcriptional Repression Signaling,Estrogen Receptor Signaling,Generic Transcription Pathway,Pyridoxal 5'-phosphate Salvage Pathway,Regulation of lipid metabolism by PPARalpha,Salvage Pathways of Pyrimidine Ribonucleotides,Signaling by NOTCH1,Transcriptional activity of SMAD2/SMAD3:SMAD4 heterotrimer,Transcriptional regulation of…
hsa-miR-409-3p	miR-409-3p (miRNAs w/seed AAUGUUG)	1,226	TargetScan Human	High (predicted)	CDK8	CDK8	-6,650	Cell Cycle Control of Chromosomal Replication,DNA Methylation and Transcriptional Repression Signaling,Estrogen Receptor Signaling,Generic Transcription Pathway,Pyridoxal 5'-phosphate Salvage Pathway,Regulation of lipid metabolism by PPARalpha,Salvage Pathways of Pyrimidine Ribonucleotides,Signaling by NOTCH1,Transcriptional activity of SMAD2/SMAD3:SMAD4 heterotrimer,Transcriptional regulation of…
hsa-miR-625-5p	miR-625-5p (and other miRNAs w/seed GGGGGAA)	-8,157	TargetScan Human	High (predicted)	CDKN2A	CDKN2A	8,143	Aryl Hydrocarbon Receptor Signaling,BER (Base Excision Repair) Pathway,Bladder Cancer Signaling,Cell Cycle Checkpoints,Cell Cycle: G1/S Checkpoint Regulation,Cell Cycle: G2/M DNA Damage Checkpoint Regulation,Chronic Myeloid Leukemia Signaling,Cyclins and Cell Cycle Regulation,Glioblastoma Multiforme Signaling,Glioma Signaling,HGF Signaling,ID1 Signaling Pathway,Intrinsic Pathway for Apoptosis,KEA…
hsa-miR-432-5p	miR-432 (and other miRNAs w/seed CUUGGAG)	-24,471	TargetScan Human	High (predicted)	CDKN2B	CDKN2B	5,201	Cell Cycle: G1/S Checkpoint Regulation,Cyclins and Cell Cycle Regulation,Glioma Signaling,Mitotic G1 phase and G1/S transition,Molecular Mechanisms of Cancer,Oncogene Induced Senescence,Oxidative Stress Induced Senescence,Pancreatic Adenocarcinoma Signaling,RAR Activation,Senescence Pathway,Senescence-Associated Secretory Phenotype (SASP),Small Cell Lung Cancer Signaling,Transcriptional activity …
hsa-miR-155-5p	miR-155-5p (miRNAs w/seed UAAUGCU)	2,493	TargetScan Mouse,Ingenuity Expert Findings,TarBase,TargetScan Human,miRecords	Experimentally Observed,High (predicted)	CEBPB	CEBPB	2,930	Activin Inhibin Signaling Pathway,Acute Phase Response Signaling,Adipogenesis pathway,Adrenomedullin signaling pathway,ATF4 activates genes in response to endoplasmic reticulum stress,Cachexia Signaling Pathway,DNA Methylation and Transcriptional Repression Signaling,Hepatic Fibrosis Signaling Pathway,IL-12 Signaling and Production in Macrophages,IL-17 Signaling,IL-17A Signaling in Fibroblasts,IL…
hsa-miR-369-3p	miR-369-3p (miRNAs w/seed AUAAUAC)	-24,471	TargetScan Mouse,TargetScan Human	High (predicted)	CEBPB	CEBPB	2,930	Activin Inhibin Signaling Pathway,Acute Phase Response Signaling,Adipogenesis pathway,Adrenomedullin signaling pathway,ATF4 activates genes in response to endoplasmic reticulum stress,Cachexia Signaling Pathway,DNA Methylation and Transcriptional Repression Signaling,Hepatic Fibrosis Signaling Pathway,IL-12 Signaling and Production in Macrophages,IL-17 Signaling,IL-17A Signaling in Fibroblasts,IL…
hsa-miR-193a-5p	miR-193a-5p (miRNAs w/seed GGGUCUU)	-24,471	TargetScan Human	High (predicted)	CEBPG	CEBPG	3,131	ATF4 activates genes in response to endoplasmic reticulum stress,Response of EIF2AK1 (HRI) to heme deficiency,Response of EIF2AK4 (GCN2) to amino acid deficiency,Role of Chondrocytes in Rheumatoid Arthritis Signaling Pathway,Role of Macrophages, Fibroblasts and Endothelial Cells in Rheumatoid Arthritis,Unfolded protein response
hsa-miR-625-5p	miR-625-5p (and other miRNAs w/seed GGGGGAA)	-8,157	TargetScan Human	High (predicted)	CEBPG	CEBPG	3,131	ATF4 activates genes in response to endoplasmic reticulum stress,Response of EIF2AK1 (HRI) to heme deficiency,Response of EIF2AK4 (GCN2) to amino acid deficiency,Role of Chondrocytes in Rheumatoid Arthritis Signaling Pathway,Role of Macrophages, Fibroblasts and Endothelial Cells in Rheumatoid Arthritis,Unfolded protein response
hsa-miR-454-3p	miR-130a-3p (and other miRNAs w/seed AGUGCAA)	-24,471	TargetScan Human	High (predicted)	CENPO	CENPO	13,748	Cell Cycle Checkpoints,Kinetochore Metaphase Signaling Pathway,Mitotic Metaphase and Anaphase,Mitotic Prometaphase,Nucleosome assembly,RHO GTPases Activate Formins
hsa-miR-337-5p	miR-337-5p (miRNAs w/seed AACGGCU)	-12,236	TargetScan Human	High (predicted)	CETN2	CETN2	-2,546	Cilium Assembly,Mitotic G2-G2/M phases,Mitotic Prometaphase,NER (Nucleotide Excision Repair, Enhanced Pathway),Nucleotide Excision Repair,SUMOylation of DNA damage response and repair proteins
hsa-miR-376c-5p	miR-376b-5p (and other miRNAs w/seed GUGGAUA)	-24,471	TargetScan Human	High (predicted)	CETN2	CETN2	-2,546	Cilium Assembly,Mitotic G2-G2/M phases,Mitotic Prometaphase,NER (Nucleotide Excision Repair, Enhanced Pathway),Nucleotide Excision Repair,SUMOylation of DNA damage response and repair proteins
hsa-miR-625-5p	miR-625-5p (and other miRNAs w/seed GGGGGAA)	-8,157	TargetScan Human	High (predicted)	CETN2	CETN2	-2,546	Cilium Assembly,Mitotic G2-G2/M phases,Mitotic Prometaphase,NER (Nucleotide Excision Repair, Enhanced Pathway),Nucleotide Excision Repair,SUMOylation of DNA damage response and repair proteins
hsa-miR-199a-3p	miR-199a-3p (and other miRNAs w/seed CAGUAGU)	-1,224	TargetScan Mouse,TargetScan Human	High (predicted),Moderate (predicted)	CFL2	CFL2	-3,492	ABRA Signaling Pathway,Actin Cytoskeleton Signaling,Axonal Guidance Signaling,B Cell Receptor Signaling,CCR3 Signaling in Eosinophils,CDC42 Signaling,Ephrin A Signaling,Ephrin B Signaling,Ephrin Receptor Signaling,Epithelial Adherens Junction Signaling,Estrogen Receptor Signaling,Germ Cell-Sertoli Cell Junction Signaling,ILK Signaling,Natural Killer Cell Signaling,PAK Signaling,Phagosome Formatio…
hsa-miR-3187-3p	miR-3187-3p (miRNAs w/seed UGGCCAU)	-24,471	TargetScan Human	High (predicted)	CHM	CHM	-3,107	RAB GEFs exchange GTP for GDP on RABs,RAB geranylgeranylation,TP53 Regulates Transcription of Cell Death Genes
hsa-miR-454-3p	miR-130a-3p (and other miRNAs w/seed AGUGCAA)	-24,471	TargetScan Mouse,TargetScan Human	High (predicted)	CHMP3	CHMP3	6,284	Endosomal Sorting Complex Required For Transport (ESCRT),Late endosomal microautophagy,Macroautophagy,Mechanisms of Viral Exit from Host Cells,Microautophagy Signaling Pathway,Mitotic Metaphase and Anaphase,Pyroptosis
hsa-miR-3130-5p	miR-3130-5p (and other miRNAs w/seed ACCCAGU)	-24,471	TargetScan Human	High (predicted)	CHRNA7	CHRNA7	44,331	Acetylcholine binding and downstream events,Acetylcholine Receptor Signaling Pathway,AMPK Signaling,BAG2 Signaling Pathway,Calcium Signaling,eNOS Signaling,ID1 Signaling Pathway,Pulmonary Healing Signaling Pathway
hsa-miR-485-3p	miR-485-3p (and other miRNAs w/seed UCAUACA)	-12,236	TargetScan Human	High (predicted)	CHRNA7	CHRNA7	44,331	Acetylcholine binding and downstream events,Acetylcholine Receptor Signaling Pathway,AMPK Signaling,BAG2 Signaling Pathway,Calcium Signaling,eNOS Signaling,ID1 Signaling Pathway,Pulmonary Healing Signaling Pathway
hsa-miR-193b-3p	miR-193a-3p (and other miRNAs w/seed ACUGGCC)	-12,236	TargetScan Human	High (predicted)	CHRNB1	CHRNB1	-8,790	Acetylcholine Receptor Signaling Pathway,AMPK Signaling,Calcium Signaling,eNOS Signaling,ID1 Signaling Pathway
hsa-miR-455-3p	miR-455-3p (miRNAs w/seed CAGUCCA)	-3,496	TargetScan Human	High (predicted)	CHRNB1	CHRNB1	-8,790	Acetylcholine Receptor Signaling Pathway,AMPK Signaling,Calcium Signaling,eNOS Signaling,ID1 Signaling Pathway
hsa-miR-485-3p	miR-485-3p (and other miRNAs w/seed UCAUACA)	-12,236	TargetScan Human	High (predicted)	CHTOP	CHTOP	-3,456	Processing of Capped Intron-Containing Pre-mRNA,RNA Polymerase II Transcription
hsa-miR-625-5p	miR-625-5p (and other miRNAs w/seed GGGGGAA)	-8,157	TargetScan Human	High (predicted)	CHUK	CHUK	-9,048	4-1BB Signaling in T Lymphocytes,Activation of IRF by Cytosolic Pattern Recognition Receptors,Activin Inhibin Signaling Pathway,Acute Phase Response Signaling,Altered T Cell and B Cell Signaling in Rheumatoid Arthritis,Angiopoietin Signaling,Antioxidant Action of Vitamin C,Apoptosis Signaling,April Mediated Signaling,B Cell Activating Factor Signaling,B Cell Receptor Signaling,C-type lectin recep…
hsa-miR-214-3p	miR-214-3p (and other miRNAs w/seed CAGCAGG)	-4,894	TargetScan Human	High (predicted)	CIT	CIT	-45,343	RHO GTPase cycle,RHO GTPases activate CIT,RHOA Signaling,Signaling by Rho Family GTPases
hsa-miR-214-3p	miR-214-3p (and other miRNAs w/seed CAGCAGG)	-4,894	TargetScan Human	High (predicted)	CKB	CKB	-16,498	Creatine-phosphate Biosynthesis,RHO GTPase cycle
hsa-miR-654-5p	miR-541-3p (and other miRNAs w/seed GGUGGGC)	-12,236	TargetScan Human	High (predicted)	CKB	CKB	-16,498	Creatine-phosphate Biosynthesis,RHO GTPase cycle
hsa-miR-99a-5p	miR-100-5p (and other miRNAs w/seed ACCCGUA)	7,437	TargetScan Human	High (predicted)	CLDN11	CLDN11	174,121	Agranulocyte Adhesion and Diapedesis,Cell junction organization,Granulocyte Adhesion and Diapedesis,Leukocyte Extravasation Signaling,Sertoli Cell-Germ Cell Junction Signaling Pathway (Enhanced),Sertoli Cell-Sertoli Cell Junction Signaling,Tight Junction Signaling
hsa-miR-625-5p	miR-625-5p (and other miRNAs w/seed GGGGGAA)	-8,157	TargetScan Human	High (predicted)	CLDN11	CLDN11	174,121	Agranulocyte Adhesion and Diapedesis,Cell junction organization,Granulocyte Adhesion and Diapedesis,Leukocyte Extravasation Signaling,Sertoli Cell-Germ Cell Junction Signaling Pathway (Enhanced),Sertoli Cell-Sertoli Cell Junction Signaling,Tight Junction Signaling
hsa-miR-92b-3p	miR-92a-3p (and other miRNAs w/seed AUUGCAC)	76,008	TargetScan Mouse,TargetScan Human	High (predicted)	CLDN11	CLDN11	174,121	Agranulocyte Adhesion and Diapedesis,Cell junction organization,Granulocyte Adhesion and Diapedesis,Leukocyte Extravasation Signaling,Sertoli Cell-Germ Cell Junction Signaling Pathway (Enhanced),Sertoli Cell-Sertoli Cell Junction Signaling,Tight Junction Signaling
hsa-miR-193a-5p	miR-193a-5p (miRNAs w/seed GGGUCUU)	-24,471	TargetScan Mouse,TargetScan Human	High (predicted),Moderate (predicted)	CLIP3	CLIP3	3,112	TNF signaling
hsa-miR-149-5p	miR-149-5p (miRNAs w/seed CUGGCUC)	16,673	TargetScan Human	High (predicted)	CLK2	CLK2	-2,111	IL-15 Production,Sperm Motility
hsa-miR-2116-3p	miR-2116-3p (miRNAs w/seed CUCCCAU)	-24,471	TargetScan Human	High (predicted)	CMTM6	CMTM6	60,539	Neutrophil degranulation
hsa-miR-485-5p	miR-485-5p (and other miRNAs w/seed GAGGCUG)	-4,079	TargetScan Mouse,TargetScan Human	High (predicted),Moderate (predicted)	CNKSR3	CNKSR3	-3,141	PTEN Signaling,Tight Junction Signaling
hsa-miR-625-5p	miR-625-5p (and other miRNAs w/seed GGGGGAA)	-8,157	TargetScan Human	High (predicted)	CNN2	CNN2	2,083	Gene and protein expression by JAK-STAT signaling after IL-12 stimulation,Neutrophil degranulation
hsa-miR-654-5p	miR-541-3p (and other miRNAs w/seed GGUGGGC)	-12,236	TargetScan Human	High (predicted)	CNOT4	CNOT4	-4,081	Deadenylation-dependent mRNA decay,Inhibition of ARE-Mediated mRNA Degradation Pathway,TP53 Regulates Transcription of Cell Cycle Genes
hsa-miR-193b-3p	miR-193a-3p (and other miRNAs w/seed ACUGGCC)	-12,236	TargetScan Mouse,TargetScan Human	High (predicted)	CNOT6	CNOT6	-11,899	CSDE1 Signaling Pathway,Deadenylation-dependent mRNA decay,Inhibition of ARE-Mediated mRNA Degradation Pathway,TP53 Regulates Transcription of Cell Cycle Genes
hsa-miR-377-3p	miR-377-3p (miRNAs w/seed UCACACA)	-24,471	TargetScan Human	High (predicted)	CNOT6	CNOT6	-11,899	CSDE1 Signaling Pathway,Deadenylation-dependent mRNA decay,Inhibition of ARE-Mediated mRNA Degradation Pathway,TP53 Regulates Transcription of Cell Cycle Genes
hsa-miR-199a-3p	miR-199a-3p (and other miRNAs w/seed CAGUAGU)	-1,224	TargetScan Mouse,TargetScan Human	High (predicted)	CNOT7	CNOT7	-2,773	Cell Cycle Regulation by BTG Family Proteins,Deadenylation-dependent mRNA decay,Inhibition of ARE-Mediated mRNA Degradation Pathway,TP53 Regulates Transcription of Cell Cycle Genes
hsa-miR-3615	miR-3615 (miRNAs w/seed CUCUCGG)	-12,236	TargetScan Human	High (predicted)	COG4	COG4	-1,951	COPI-mediated anterograde transport,Intra-Golgi and retrograde Golgi-to-ER traffic
hsa-miR-654-5p	miR-541-3p (and other miRNAs w/seed GGUGGGC)	-12,236	TargetScan Human	High (predicted)	COL11A2	COL11A2	-16,511	Activin Inhibin Signaling Pathway,Apelin Liver Signaling Pathway,Assembly of collagen fibrils and other multimeric structures,Atherosclerosis Signaling,Collagen biosynthesis and modifying enzymes,Collagen chain trimerization,Collagen degradation,Dendritic Cell Maturation,Extracellular matrix organization,FAK Signaling,GP6 Signaling Pathway,Hepatic Fibrosis / Hepatic Stellate Cell Activation,Hepat…
hsa-miR-199a-3p	miR-199a-3p (and other miRNAs w/seed CAGUAGU)	-1,224	TargetScan Human	High (predicted)	COL4A5	COL4A5	9,669	Assembly of collagen fibrils and other multimeric structures,Collagen biosynthesis and modifying enzymes,Collagen chain trimerization,Collagen degradation,Extracellular matrix organization,GP6 Signaling Pathway,Hepatic Fibrosis / Hepatic Stellate Cell Activation,IL-4 Signaling,Integrin cell surface interactions,Microautophagy Signaling Pathway,NCAM signaling for neurite out-growth,Neutrophil Extr…
hsa-miR-432-5p	miR-432 (and other miRNAs w/seed CUUGGAG)	-24,471	TargetScan Human	High (predicted)	COL4A5	COL4A5	9,669	Assembly of collagen fibrils and other multimeric structures,Collagen biosynthesis and modifying enzymes,Collagen chain trimerization,Collagen degradation,Extracellular matrix organization,GP6 Signaling Pathway,Hepatic Fibrosis / Hepatic Stellate Cell Activation,IL-4 Signaling,Integrin cell surface interactions,Microautophagy Signaling Pathway,NCAM signaling for neurite out-growth,Neutrophil Extr…
hsa-miR-654-5p	miR-541-3p (and other miRNAs w/seed GGUGGGC)	-12,236	TargetScan Human	High (predicted)	COL5A1	COL5A1	1,936	Assembly of collagen fibrils and other multimeric structures,Collagen biosynthesis and modifying enzymes,Collagen chain trimerization,Collagen degradation,Extracellular matrix organization,GP6 Signaling Pathway,Hepatic Fibrosis / Hepatic Stellate Cell Activation,IL-4 Signaling,Integrin cell surface interactions,Microautophagy Signaling Pathway,NCAM signaling for neurite out-growth,Neutrophil Extr…
hsa-miR-323a-5p	miR-323-5p (and other miRNAs w/seed GGUGGUC)	-8,157	TargetScan Mouse,TargetScan Human	High (predicted)	COL5A2	COL5A2	4,053	Assembly of collagen fibrils and other multimeric structures,Collagen biosynthesis and modifying enzymes,Collagen chain trimerization,Collagen degradation,Extracellular matrix organization,GP6 Signaling Pathway,Hepatic Fibrosis / Hepatic Stellate Cell Activation,IL-4 Signaling,Integrin cell surface interactions,Microautophagy Signaling Pathway,NCAM signaling for neurite out-growth,Neutrophil Extr…
hsa-miR-130b-5p	miR-130b-5p (and other miRNAs w/seed CUCUUUC)	-1,165	TargetScan Human	High (predicted)	COL8A1	COL8A1	3,244	Assembly of collagen fibrils and other multimeric structures,Collagen biosynthesis and modifying enzymes,Collagen chain trimerization,Collagen degradation,GP6 Signaling Pathway,Hepatic Fibrosis / Hepatic Stellate Cell Activation,IL-4 Signaling,Integrin cell surface interactions,Microautophagy Signaling Pathway,Neutrophil Extracellular Trap Signaling Pathway,Pathogen Induced Cytokine Storm Signali…
hsa-miR-214-3p	miR-214-3p (and other miRNAs w/seed CAGCAGG)	-4,894	TargetScan Human	High (predicted)	COP1	COP1	-3,608	Cell Cycle Checkpoints,DNA damage-induced 14-3-3σ Signaling,Neddylation
hsa-miR-199a-3p	miR-199a-3p (and other miRNAs w/seed CAGUAGU)	-1,224	TargetScan Human	High (predicted)	COPS2	COPS2	-8,638	Cargo recognition for clathrin-mediated endocytosis,Neddylation,NER (Nucleotide Excision Repair, Enhanced Pathway),Nucleotide Excision Repair,RHO GTPase cycle
hsa-miR-3613-5p	miR-3613-5p (miRNAs w/seed GUUGUAC)	-24,471	TargetScan Human	High (predicted)	COPS2	COPS2	-8,638	Cargo recognition for clathrin-mediated endocytosis,Neddylation,NER (Nucleotide Excision Repair, Enhanced Pathway),Nucleotide Excision Repair,RHO GTPase cycle
hsa-miR-3152-5p	miR-3152-5p (miRNAs w/seed UUGCCUC)	-24,471	TargetScan Human	High (predicted)	COPS7A	COPS7A	-3,868	Cargo recognition for clathrin-mediated endocytosis,Neddylation,NER (Nucleotide Excision Repair, Enhanced Pathway),Nucleotide Excision Repair
hsa-miR-654-5p	miR-541-3p (and other miRNAs w/seed GGUGGGC)	-12,236	TargetScan Human	High (predicted)	COTL1	COTL1	104,920	Neutrophil degranulation
hsa-miR-92b-3p	miR-92a-3p (and other miRNAs w/seed AUUGCAC)	76,008	TargetScan Human	High (predicted)	COX20	COX20	5,287	Cytoprotection by HMOX1,Electron transport, ATP synthesis, and heat production by uncoupling proteins,TP53 Regulates Metabolic Genes
hsa-miR-485-5p	miR-485-5p (and other miRNAs w/seed GAGGCUG)	-4,079	TargetScan Human	High (predicted)	COX7B	COX7B	5,194	Cytoprotection by HMOX1,Electron transport, ATP synthesis, and heat production by uncoupling proteins,HER-2 Signaling in Breast Cancer,Mitochondrial Dysfunction,Oxidative Phosphorylation,TP53 Regulates Metabolic Genes
hsa-miR-193b-3p	miR-193a-3p (and other miRNAs w/seed ACUGGCC)	-12,236	TargetScan Human	High (predicted)	COX7C	COX7C	15,379	Cytoprotection by HMOX1,Electron transport, ATP synthesis, and heat production by uncoupling proteins,HER-2 Signaling in Breast Cancer,Mitochondrial Dysfunction,Oxidative Phosphorylation,TP53 Regulates Metabolic Genes
hsa-miR-454-3p	miR-130a-3p (and other miRNAs w/seed AGUGCAA)	-24,471	TargetScan Human	High (predicted)	CPPED1	CPPED1	5,154	Neutrophil degranulation
hsa-miR-887-3p	miR-887-3p (miRNAs w/seed UGAACGG)	-12,236	TargetScan Human	High (predicted)	CPPED1	CPPED1	5,154	Neutrophil degranulation
hsa-miR-149-5p	miR-149-5p (miRNAs w/seed CUGGCUC)	16,673	TargetScan Human	High (predicted)	CRCP	CRCP	4,160	Adrenomedullin signaling pathway,Class B/2 (Secretin family receptors),RNA Polymerase III Transcription
hsa-miR-485-5p	miR-485-5p (and other miRNAs w/seed GAGGCUG)	-4,079	TargetScan Mouse,TargetScan Human	High (predicted),Moderate (predicted)	CRCP	CRCP	4,160	Adrenomedullin signaling pathway,Class B/2 (Secretin family receptors),RNA Polymerase III Transcription
hsa-miR-181a-2-3p	miR-181a-2-3p (and other miRNAs w/seed CCACUGA)	-24,471	TargetScan Mouse,TargetScan Human	High (predicted)	CRK	CRK	-2,274	Actin Cytoskeleton Signaling,Angiopoietin Signaling,Axonal Guidance Signaling,Chronic Myeloid Leukemia Signaling,CXCR4 Signaling,Ephrin Receptor Signaling,Epithelial Adherens Junction Signaling,ERK/MAPK Signaling,FAK Signaling,Fcgamma receptor (FCGR) dependent phagocytosis,Fcγ Receptor-mediated Phagocytosis in Macrophages and Monocytes,FGF Signaling,G-Protein Coupled Receptor Signaling,Insulin Re…
hsa-miR-376c-5p	miR-376b-5p (and other miRNAs w/seed GUGGAUA)	-24,471	TargetScan Human	High (predicted)	CRK	CRK	-2,274	Actin Cytoskeleton Signaling,Angiopoietin Signaling,Axonal Guidance Signaling,Chronic Myeloid Leukemia Signaling,CXCR4 Signaling,Ephrin Receptor Signaling,Epithelial Adherens Junction Signaling,ERK/MAPK Signaling,FAK Signaling,Fcgamma receptor (FCGR) dependent phagocytosis,Fcγ Receptor-mediated Phagocytosis in Macrophages and Monocytes,FGF Signaling,G-Protein Coupled Receptor Signaling,Insulin Re…
hsa-miR-625-5p	miR-625-5p (and other miRNAs w/seed GGGGGAA)	-8,157	TargetScan Mouse,TargetScan Human	High (predicted),Moderate (predicted)	CRK	CRK	-2,274	Actin Cytoskeleton Signaling,Angiopoietin Signaling,Axonal Guidance Signaling,Chronic Myeloid Leukemia Signaling,CXCR4 Signaling,Ephrin Receptor Signaling,Epithelial Adherens Junction Signaling,ERK/MAPK Signaling,FAK Signaling,Fcgamma receptor (FCGR) dependent phagocytosis,Fcγ Receptor-mediated Phagocytosis in Macrophages and Monocytes,FGF Signaling,G-Protein Coupled Receptor Signaling,Insulin Re…
hsa-miR-625-5p	miR-625-5p (and other miRNAs w/seed GGGGGAA)	-8,157	TargetScan Mouse,TargetScan Human	High (predicted),Moderate (predicted)	CSF2RB	CSF2RB	186,591	Acute Myeloid Leukemia Signaling,Antioxidant Action of Vitamin C,Cardiac Hypertrophy Signaling (Enhanced),Crosstalk between Dendritic Cells and Natural Killer Cells,Erythropoietin Signaling Pathway,FAK Signaling,Glucocorticoid Receptor Signaling,GM-CSF Signaling,IL-3 Signaling,Interleukin-2 family signaling,Interleukin-3, Interleukin-5 and GM-CSF signaling,Molecular Mechanisms of Cancer,MSP-RON S…
hsa-miR-155-5p	miR-155-5p (miRNAs w/seed UAAUGCU)	2,493	TargetScan Human	High (predicted)	CSNK1A1	CSNK1A1	-2,395	Amyloid Processing,Degradation of beta-catenin by the destruction complex,Dopamine-DARPP32 Feedback in cAMP Signaling,Gap Junction Signaling,Hedgehog 'off' state,Hedgehog 'on' state,Hepatic Fibrosis Signaling Pathway,Pyridoxal 5'-phosphate Salvage Pathway,Role of Macrophages, Fibroblasts and Endothelial Cells in Rheumatoid Arthritis,Role of NFAT in Cardiac Hypertrophy,Role of NFAT in Regulation o…
hsa-miR-654-5p	miR-541-3p (and other miRNAs w/seed GGUGGGC)	-12,236	TargetScan Human	High (predicted)	CSNK2A2	CSNK2A2	-1,947	Amyloid Processing,Circadian Rhythm Signaling,Clathrin-mediated Endocytosis Signaling,EGF Signaling,Glycerophospholipid biosynthesis,IGF-1 Signaling,IL-2 Signaling,IL-6 Signaling,KEAP1-NFE2L2 pathway,L1CAM interactions,Mitophagy,Mitotic Prometaphase,NF-κB Signaling,PD-1, PD-L1 cancer immunotherapy pathway,PDGF Signaling,Polyamine Regulation in Colon Cancer,Protein folding,PTEN Regulation,PTEN Sig…
hsa-miR-154-5p	miR-154-5p (miRNAs w/seed AGGUUAU)	-8,157	TargetScan Human	High (predicted)	CST3	CST3	40,189	Amyloid fiber formation,Neutrophil degranulation,Post-translational protein phosphorylation,Regulation of Insulin-like Growth Factor (IGF) transport and uptake by IGFBPs
hsa-miR-3152-5p	miR-3152-5p (miRNAs w/seed UUGCCUC)	-24,471	TargetScan Human	High (predicted)	CST3	CST3	40,189	Amyloid fiber formation,Neutrophil degranulation,Post-translational protein phosphorylation,Regulation of Insulin-like Growth Factor (IGF) transport and uptake by IGFBPs
hsa-miR-379-5p	miR-379-5p (and other miRNAs w/seed GGUAGAC)	-2,225	TargetScan Human	High (predicted)	CSTB	CSTB	1492,734	IL-8 Signaling,Neutrophil degranulation
hsa-miR-485-3p	miR-485-3p (and other miRNAs w/seed UCAUACA)	-12,236	TargetScan Mouse,TargetScan Human	High (predicted),Moderate (predicted)	CTBP1	CTBP1	-2,387	Adipogenesis pathway,Chronic Myeloid Leukemia Signaling,Degradation of beta-catenin by the destruction complex,Estrogen Receptor Signaling,Protein Sorting Signaling Pathway,SUMOylation of transcription cofactors,Sumoylation Pathway,TCF dependent signaling in response to WNT,White Adipose Tissue Browning Pathway
hsa-miR-134-5p	miR-3118 (and other miRNAs w/seed GUGACUG)	-24,471	TargetScan Mouse,TargetScan Human	High (predicted),Moderate (predicted)	CTNNA1	CTNNA1	-2,383	Cell junction organization,Endometrial Cancer Signaling,Epithelial Adherens Junction Signaling,Germ Cell-Sertoli Cell Junction Signaling,Leukocyte Extravasation Signaling,Molecular Mechanisms of Cancer,Myogenesis,Osteoarthritis Pathway,Remodeling of Epithelial Adherens Junctions,RHO GTPases activate IQGAPs,Role of Osteoclasts in Rheumatoid Arthritis Signaling Pathway,Sertoli Cell-Germ Cell Juncti…
hsa-miR-214-3p	miR-214-3p (and other miRNAs w/seed CAGCAGG)	-4,894	TargetScan Mouse,Ingenuity Expert Findings,TargetScan Human	Experimentally Observed,Moderate (predicted)	CTNNB1	CTNNB1	-10,452	Activin Inhibin Signaling Pathway,Adipogenesis pathway,Apoptotic execution phase,Autism Signaling Pathway,Basal Cell Carcinoma Signaling,Beta-catenin independent WNT signaling,BEX2 Signaling Pathway,Cardiac Hypertrophy Signaling (Enhanced),CDX Gastrointestinal Cancer Signaling Pathway,Cell junction organization,Chronic Myeloid Leukemia Signaling,Colorectal Cancer Metastasis Signaling,CSDE1 Signal…
hsa-miR-485-5p	miR-485-5p (and other miRNAs w/seed GAGGCUG)	-4,079	TargetScan Human	High (predicted)	CTNS	CTNS	6,630	CLEAR Signaling Pathway,Miscellaneous transport and binding events,Transport of inorganic cations/anions and amino acids/oligopeptides
hsa-miR-625-5p	miR-625-5p (and other miRNAs w/seed GGGGGAA)	-8,157	TargetScan Human	High (predicted)	CTSB	CTSB	45,203	Assembly of collagen fibrils and other multimeric structures,BAG2 Signaling Pathway,CLEAR Signaling Pathway,Collagen degradation,Ferroptosis Signaling Pathway,Inflammasome pathway,MHC class II antigen presentation,NAFLD Signaling Pathway,Neutrophil degranulation,Phagosome Maturation,Role of Osteoblasts in Rheumatoid Arthritis Signaling Pathway,SPINK1 Pancreatic Cancer Pathway,Trafficking and proc…
hsa-miR-137-3p	miR-137-3p (miRNAs w/seed UAUUGCU)	-8,157	TargetScan Human	High (predicted)	CTSF	CTSF	158,348	CLEAR Signaling Pathway,MHC class II antigen presentation,Phagosome Maturation,Role of Osteoblasts in Rheumatoid Arthritis Signaling Pathway
hsa-miR-3130-5p	miR-3130-5p (and other miRNAs w/seed ACCCAGU)	-24,471	TargetScan Human	High (predicted)	CTSF	CTSF	158,348	CLEAR Signaling Pathway,MHC class II antigen presentation,Phagosome Maturation,Role of Osteoblasts in Rheumatoid Arthritis Signaling Pathway
hsa-miR-379-5p	miR-379-5p (and other miRNAs w/seed GGUAGAC)	-2,225	TargetScan Human	High (predicted)	CTSL	CTSL	30,398	Assembly of collagen fibrils and other multimeric structures,Class I MHC mediated antigen processing and presentation,Collagen degradation,Coronavirus Pathogenesis Pathway,Coronavirus Replication Pathway,Degradation of the extracellular matrix,MHC class II antigen presentation,Phagosome Maturation,Role of Osteoblasts in Rheumatoid Arthritis Signaling Pathway,Trafficking and processing of endosoma…
hsa-let-7a-2-3p	let-7a-2-3p (and other miRNAs w/seed UGUACAG)	2,248	TargetScan Human	High (predicted)	CTSS	CTSS	68,418	Assembly of collagen fibrils and other multimeric structures,Class I MHC mediated antigen processing and presentation,Degradation of the extracellular matrix,MHC class II antigen presentation,Neutrophil degranulation,Phagosome Maturation,Role of Osteoblasts in Rheumatoid Arthritis Signaling Pathway,Trafficking and processing of endosomal TLR
hsa-miR-493-5p	miR-493-5p (miRNAs w/seed UGUACAU)	-24,471	TargetScan Human	High (predicted)	CTSV	CTSV	-26,433	Activation of Matrix Metalloproteinases,Assembly of collagen fibrils and other multimeric structures,Class I MHC mediated antigen processing and presentation,Degradation of the extracellular matrix,MHC class II antigen presentation,Phagosome Maturation,Role of Osteoblasts in Rheumatoid Arthritis Signaling Pathway,Trafficking and processing of endosomal TLR,Transcriptional regulation by RUNX1
hsa-let-7a-2-3p	let-7a-2-3p (and other miRNAs w/seed UGUACAG)	2,248	TargetScan Mouse,TargetScan Human	High (predicted),Moderate (predicted)	CUL1	CUL1	-3,786	Antiproliferative Role of TOB in T Cell Signaling,C-type lectin receptors (CLRs),Cell Cycle: G1/S Checkpoint Regulation,Cell Cycle: G2/M DNA Damage Checkpoint Regulation,Circadian Clock,Class I MHC mediated antigen processing and presentation,Cyclins and Cell Cycle Regulation,Degradation of beta-catenin by the destruction complex,Fc epsilon receptor (FCERI) signaling,Hedgehog 'off' state,HIPPO si…
hsa-miR-377-3p	miR-377-3p (miRNAs w/seed UCACACA)	-24,471	TargetScan Mouse,TargetScan Human	High (predicted)	CUL1	CUL1	-3,786	Antiproliferative Role of TOB in T Cell Signaling,C-type lectin receptors (CLRs),Cell Cycle: G1/S Checkpoint Regulation,Cell Cycle: G2/M DNA Damage Checkpoint Regulation,Circadian Clock,Class I MHC mediated antigen processing and presentation,Cyclins and Cell Cycle Regulation,Degradation of beta-catenin by the destruction complex,Fc epsilon receptor (FCERI) signaling,Hedgehog 'off' state,HIPPO si…
hsa-miR-154-5p	miR-154-5p (miRNAs w/seed AGGUUAU)	-8,157	TargetScan Mouse,TargetScan Human	High (predicted),Moderate (predicted)	CUL2	CUL2	-2,918	Cellular response to hypoxia,Class I MHC mediated antigen processing and presentation,HIF1α Signaling,Neddylation,Protein Ubiquitination Pathway,Renal Cell Carcinoma Signaling,Signaling by ROBO receptors,WNK Renal Signaling Pathway
hsa-miR-455-3p	miR-455-3p (miRNAs w/seed CAGUCCA)	-3,496	TargetScan Mouse,TargetScan Human	High (predicted)	CUL3	CUL3	-10,968	BBSome Signaling Pathway,Class I MHC mediated antigen processing and presentation,Hedgehog 'on' state,ID1 Signaling Pathway,KEAP1-NFE2L2 pathway,Neddylation,NRF2-mediated Oxidative Stress Response,RAF/MAP kinase cascade,RHO GTPase cycle,RHOBTB3 ATPase cycle,TCF dependent signaling in response to WNT,WNK Renal Signaling Pathway,Xenobiotic Metabolism General Signaling Pathway,Xenobiotic Metabolism …
hsa-miR-181a-2-3p	miR-181a-2-3p (and other miRNAs w/seed CCACUGA)	-24,471	TargetScan Mouse,TargetScan Human	High (predicted),Moderate (predicted)	CUTC	CUTC	4,108	Ion channel transport
hsa-miR-493-5p	miR-493-5p (miRNAs w/seed UGUACAU)	-24,471	TargetScan Human	High (predicted)	CWC25	CWC25	3,072	Processing of Capped Intron-Containing Pre-mRNA,Spliceosomal Cycle
hsa-miR-3187-3p	miR-3187-3p (miRNAs w/seed UGGCCAU)	-24,471	TargetScan Human	High (predicted)	CXCL1	CXCL1	10,404	Agranulocyte Adhesion and Diapedesis,Airway Pathology in Chronic Obstructive Pulmonary Disease,Class A/1 (Rhodopsin-like receptors),Differential Regulation of Cytokine Production in Intestinal Epithelial Cells by IL-17A and IL-17F,Differential Regulation of Cytokine Production in Macrophages and T Helper Cells by IL-17A and IL-17F,G alpha (i) signalling events,Granulocyte Adhesion and Diapedesis,…
hsa-miR-654-5p	miR-541-3p (and other miRNAs w/seed GGUGGGC)	-12,236	TargetScan Human	High (predicted)	CXCL16	CXCL16	68,367	Agranulocyte Adhesion and Diapedesis,Class A/1 (Rhodopsin-like receptors),G alpha (i) signalling events,Granulocyte Adhesion and Diapedesis,Pathogen Induced Cytokine Storm Signaling Pathway
hsa-miR-493-5p	miR-493-5p (miRNAs w/seed UGUACAU)	-24,471	TargetScan Human	High (predicted)	CXCL8	CXCL8	431,368	Adrenergic Receptor Signaling Pathway (Enhanced),Agranulocyte Adhesion and Diapedesis,Airway Inflammation in Asthma,Airway Pathology in Chronic Obstructive Pulmonary Disease,ATF4 activates genes in response to endoplasmic reticulum stress,Atherosclerosis Signaling,Autism Signaling Pathway,Bladder Cancer Signaling,Cachexia Signaling Pathway,Cardiac Hypertrophy Signaling (Enhanced),CDX Gastrointest…
hsa-miR-889-3p	miR-889-3p (miRNAs w/seed UAAUAUC)	-4,894	TargetScan Human	High (predicted)	CXCL8	CXCL8	431,368	Adrenergic Receptor Signaling Pathway (Enhanced),Agranulocyte Adhesion and Diapedesis,Airway Inflammation in Asthma,Airway Pathology in Chronic Obstructive Pulmonary Disease,ATF4 activates genes in response to endoplasmic reticulum stress,Atherosclerosis Signaling,Autism Signaling Pathway,Bladder Cancer Signaling,Cachexia Signaling Pathway,Cardiac Hypertrophy Signaling (Enhanced),CDX Gastrointest…
hsa-miR-199a-3p	miR-199a-3p (and other miRNAs w/seed CAGUAGU)	-1,224	TargetScan Human	High (predicted)	CYB5R4	CYB5R4	-2,940	Erythrocytes take up carbon dioxide and release oxygen
hsa-miR-2682-3p	miR-2682-3p (and other miRNAs w/seed GCCUCUU)	-24,471	TargetScan Human	High (predicted)	CYC1	CYC1	-2,565	Apoptosis Signaling,CD27 Signaling in Lymphocytes,Cytotoxic T Lymphocyte-mediated Apoptosis of Target Cells,Death Receptor Signaling,Electron transport, ATP synthesis, and heat production by uncoupling proteins,Estrogen Receptor Signaling,Glucocorticoid Receptor Signaling,Induction of Apoptosis by HIV1,Lymphotoxin β Receptor Signaling,Mitochondrial Dysfunction,Mitochondrial protein import,Neutrop…
hsa-miR-3187-3p	miR-3187-3p (miRNAs w/seed UGGCCAU)	-24,471	TargetScan Human	High (predicted)	CYSTM1	CYSTM1	74,899	Neutrophil degranulation
hsa-miR-214-3p	miR-214-3p (and other miRNAs w/seed CAGCAGG)	-4,894	TargetScan Human	High (predicted)	DAGLA	DAGLA	2,292	Effects of PIP2 hydrolysis,Endocannabinoid Neuronal Synapse Pathway,Gap Junction Signaling,Neurovascular Coupling Signaling Pathway,Orexin Signaling Pathway,Triacylglycerol Degradation
hsa-miR-149-5p	miR-149-5p (miRNAs w/seed CUGGCUC)	16,673	TargetScan Human	High (predicted)	DCTN5	DCTN5	2,787	COPI-mediated anterograde transport,HSP90 chaperone cycle for steroid hormone receptors in the presence of ligand,Intra-Golgi and retrograde Golgi-to-ER traffic,MHC class II antigen presentation
hsa-miR-193b-3p	miR-193a-3p (and other miRNAs w/seed ACUGGCC)	-12,236	TargetScan Human	High (predicted)	DCTN5	DCTN5	2,787	COPI-mediated anterograde transport,HSP90 chaperone cycle for steroid hormone receptors in the presence of ligand,Intra-Golgi and retrograde Golgi-to-ER traffic,MHC class II antigen presentation
hsa-miR-134-5p	miR-3118 (and other miRNAs w/seed GUGACUG)	-24,471	TargetScan Human	High (predicted)	DCTN5	DCTN5	2,787	COPI-mediated anterograde transport,HSP90 chaperone cycle for steroid hormone receptors in the presence of ligand,Intra-Golgi and retrograde Golgi-to-ER traffic,MHC class II antigen presentation
hsa-miR-376a-3p	miR-376a-3p (and other miRNAs w/seed UCAUAGA)	-4,894	TargetScan Human	High (predicted)	DCTN5	DCTN5	2,787	COPI-mediated anterograde transport,HSP90 chaperone cycle for steroid hormone receptors in the presence of ligand,Intra-Golgi and retrograde Golgi-to-ER traffic,MHC class II antigen presentation
hsa-miR-485-5p	miR-485-5p (and other miRNAs w/seed GAGGCUG)	-4,079	TargetScan Human	High (predicted)	DCTN5	DCTN5	2,787	COPI-mediated anterograde transport,HSP90 chaperone cycle for steroid hormone receptors in the presence of ligand,Intra-Golgi and retrograde Golgi-to-ER traffic,MHC class II antigen presentation
hsa-miR-323a-5p	miR-323-5p (and other miRNAs w/seed GGUGGUC)	-8,157	TargetScan Mouse,TargetScan Human	High (predicted),Moderate (predicted)	DDB1	DDB1	-3,137	DNA Damage Bypass,Neddylation,NER (Nucleotide Excision Repair, Enhanced Pathway),Nucleotide Excision Repair
hsa-miR-3187-3p	miR-3187-3p (miRNAs w/seed UGGCCAU)	-24,471	TargetScan Human	High (predicted)	DDB2	DDB2	50,974	Deubiquitination,Hereditary Breast Cancer Signaling,Neddylation,NER (Nucleotide Excision Repair, Enhanced Pathway),Nucleotide Excision Repair,TP53 Regulates Transcription of DNA Repair Genes
hsa-miR-654-5p	miR-541-3p (and other miRNAs w/seed GGUGGGC)	-12,236	TargetScan Human	High (predicted)	DDR1	DDR1	2,883	Extracellular matrix organization,IL-15 Production,Sperm Motility
hsa-miR-625-5p	miR-625-5p (and other miRNAs w/seed GGGGGAA)	-8,157	TargetScan Human	High (predicted)	DDR1	DDR1	2,883	Extracellular matrix organization,IL-15 Production,Sperm Motility
hsa-miR-454-3p	miR-130a-3p (and other miRNAs w/seed AGUGCAA)	-24,471	TargetScan Mouse,TargetScan Human	High (predicted)	DDX6	DDX6	-3,344	CSDE1 Signaling Pathway,Deadenylation-dependent mRNA decay,Inhibition of ARE-Mediated mRNA Degradation Pathway,Oxidized GTP and dGTP Detoxification
hsa-miR-214-3p	miR-214-3p (and other miRNAs w/seed CAGCAGG)	-4,894	TargetScan Human	High (predicted)	DEDD2	DEDD2	16,828	Cellular response to heat stress
hsa-miR-376c-3p	miR-376c-3p (and other miRNAs w/seed ACAUAGA)	-4,079	TargetScan Human	High (predicted)	DENND6A	DENND6A	-4,962	RAB GEFs exchange GTP for GDP on RABs
hsa-miR-155-5p	miR-155-5p (miRNAs w/seed UAAUGCU)	2,493	TargetScan Mouse,TargetScan Human	High (predicted),Moderate (predicted)	DET1	DET1	-4,201	Class I MHC mediated antigen processing and presentation
hsa-miR-485-5p	miR-485-5p (and other miRNAs w/seed GAGGCUG)	-4,079	TargetScan Mouse,TargetScan Human	High (predicted),Moderate (predicted)	DFFA	DFFA	27,937	Apoptosis Signaling,Apoptotic execution phase,Cytotoxic T Lymphocyte-mediated Apoptosis of Target Cells,Death Receptor Signaling,Granzyme B Signaling,Induction of Apoptosis by HIV1,Tumoricidal Function of Hepatic Natural Killer Cells
hsa-miR-376c-5p	miR-376b-5p (and other miRNAs w/seed GUGGAUA)	-24,471	TargetScan Human	High (predicted)	DHCR24	DHCR24	-2,265	Cholesterol biosynthesis,Cholesterol Biosynthesis I,Cholesterol Biosynthesis II (via 24,25-dihydrolanosterol),Cholesterol Biosynthesis III (via Desmosterol),DHCR24 Signaling Pathway,Senescence Pathway,Stearate Biosynthesis I (Animals),Superpathway of Cholesterol Biosynthesis
hsa-miR-204-5p	miR-204-5p (and other miRNAs w/seed UCCCUUU)	85,448	TargetScan Mouse,TargetScan Human	High (predicted),Moderate (predicted)	DHH	DHH	-135,587	Class B/2 (Secretin family receptors),Hedgehog 'on' state,Hedgehog ligand biogenesis,Molecular Mechanisms of Cancer,Protein Kinase A Signaling,Transcriptional regulation of testis differentiation
hsa-miR-2116-3p	miR-2116-3p (miRNAs w/seed CUCCCAU)	-24,471	TargetScan Human	High (predicted)	DHRS4	DHRS4	7,599	Ethanol Degradation II,Noradrenaline and Adrenaline Degradation,Peroxisomal protein import,Retinoate Biosynthesis I,Retinol Biosynthesis,Serotonin Degradation,Signaling by Retinoic Acid,The Visual Cycle
hsa-miR-4448	miR-4448 (miRNAs w/seed GCUCCUU)	2,738	TargetScan Human	High (predicted)	DHRS4	DHRS4	7,599	Ethanol Degradation II,Noradrenaline and Adrenaline Degradation,Peroxisomal protein import,Retinoate Biosynthesis I,Retinol Biosynthesis,Serotonin Degradation,Signaling by Retinoic Acid,The Visual Cycle
hsa-miR-369-5p	miR-369-5p (miRNAs w/seed GAUCGAC)	4,536	TargetScan Mouse,TargetScan Human	High (predicted)	DHX15	DHX15	-6,836	Processing of Capped Intron-Containing Pre-mRNA,Spliceosomal Cycle
hsa-miR-505-3p	miR-505-3p (miRNAs w/seed GUCAACA)	-12,236	TargetScan Mouse,TargetScan Human	High (predicted)	DHX15	DHX15	-6,836	Processing of Capped Intron-Containing Pre-mRNA,Spliceosomal Cycle
hsa-miR-370-3p	miR-370-3p (and other miRNAs w/seed CCUGCUG)	-6,118	TargetScan Mouse,TargetScan Human	High (predicted),Moderate (predicted)	DHX38	DHX38	-2,439	Processing of Capped Intron-Containing Pre-mRNA,RNA Polymerase II Transcription,Spliceosomal Cycle
hsa-miR-487b-3p	miR-487b-3p (miRNAs w/seed AUCGUAC)	-2,719	TargetScan Human	High (predicted)	DIABLO	DIABLO	2,801	Apoptosis Signaling,Ceramide Signaling,Death Receptor Signaling,Induction of Apoptosis by HIV1,Intrinsic Pathway for Apoptosis,Lymphotoxin β Receptor Signaling,Molecular Mechanisms of Cancer
hsa-miR-369-5p	miR-369-5p (miRNAs w/seed GAUCGAC)	4,536	TargetScan Human	High (predicted)	DIS3L	DIS3L	-4,972	Inhibition of ARE-Mediated mRNA Degradation Pathway,MicroRNA Biogenesis Signaling Pathway
hsa-miR-2682-3p	miR-2682-3p (and other miRNAs w/seed GCCUCUU)	-24,471	TargetScan Human	High (predicted)	DKC1	DKC1	-2,564	Telomerase Signaling,Telomere Maintenance
hsa-miR-432-5p	miR-432 (and other miRNAs w/seed CUUGGAG)	-24,471	TargetScan Human	High (predicted)	DLD	DLD	-4,980	2-ketoglutarate Dehydrogenase Complex,2-oxobutanoate Degradation I,Acetyl-CoA Biosynthesis I (Pyruvate Dehydrogenase Complex),Autism Signaling Pathway,Branched-chain amino acid catabolism,Branched-chain α-keto acid Dehydrogenase Complex,Glycine Cleavage Complex,Glyoxylate metabolism and glycine degradation,Insulin Secretion Signaling Pathway,Isoleucine Degradation I,Lysine catabolism,Macrophage C…
hsa-miR-454-3p	miR-130a-3p (and other miRNAs w/seed AGUGCAA)	-24,471	TargetScan Mouse,TargetScan Human	High (predicted),Moderate (predicted)	DLL1	DLL1	-10,787	CDX Gastrointestinal Cancer Signaling Pathway,Epithelial Adherens Junction Signaling,Formation of paraxial mesoderm,HEY1 Signaling Pathway,Notch Signaling,Signaling by NOTCH1,Signaling by NOTCH2,Signaling by NOTCH3,Th1 and Th2 Activation Pathway,Th1 Pathway,Th2 Pathway,Transcriptional Regulation by MECP2
hsa-miR-204-5p	miR-204-5p (and other miRNAs w/seed UCCCUUU)	85,448	TargetScan Mouse,TargetScan Human	High (predicted),Moderate (predicted)	DNAJC13	DNAJC13	-2,364	Aldosterone Signaling in Epithelial Cells,Neutrophil degranulation,NRF2-mediated Oxidative Stress Response,Protein Ubiquitination Pathway,Unfolded protein response
hsa-miR-660-5p	miR-660-5p (and other miRNAs w/seed ACCCAUU)	-24,471	TargetScan Human	High (predicted)	DNAJC3	DNAJC3	4,174	Aldosterone Signaling in Epithelial Cells,Endoplasmic Reticulum Stress Pathway,Neutrophil degranulation,NRF2-mediated Oxidative Stress Response,Post-translational protein phosphorylation,Protein Ubiquitination Pathway,Regulation of Insulin-like Growth Factor (IGF) transport and uptake by IGFBPs,Role of PKR in Interferon Induction and Antiviral Response,Unfolded protein response,XBP1(S) activates …
hsa-miR-370-3p	miR-370-3p (and other miRNAs w/seed CCUGCUG)	-6,118	TargetScan Human	High (predicted)	DNAJC4	DNAJC4	19,765	Aldosterone Signaling in Epithelial Cells,NRF2-mediated Oxidative Stress Response,Protein Ubiquitination Pathway,Unfolded protein response
hsa-miR-130b-5p	miR-130b-5p (and other miRNAs w/seed CUCUUUC)	-1,165	TargetScan Human	High (predicted)	DST	DST	-2,508	Assembly of collagen fibrils and other multimeric structures,Cell junction organization,RHO GTPase cycle
hsa-miR-2682-3p	miR-2682-3p (and other miRNAs w/seed GCCUCUU)	-24,471	TargetScan Human	High (predicted)	DST	DST	-2,508	Assembly of collagen fibrils and other multimeric structures,Cell junction organization,RHO GTPase cycle
hsa-miR-370-3p	miR-370-3p (and other miRNAs w/seed CCUGCUG)	-6,118	TargetScan Human	High (predicted)	DST	DST	-2,508	Assembly of collagen fibrils and other multimeric structures,Cell junction organization,RHO GTPase cycle
hsa-miR-376a-3p	miR-376a-3p (and other miRNAs w/seed UCAUAGA)	-4,894	TargetScan Human	High (predicted)	DST	DST	-2,508	Assembly of collagen fibrils and other multimeric structures,Cell junction organization,RHO GTPase cycle
hsa-miR-137-3p	miR-137-3p (miRNAs w/seed UAUUGCU)	-8,157	TargetScan Mouse,TargetScan Human	High (predicted),Moderate (predicted)	DUSP4	DUSP4	5,059	3-phosphoinositide Biosynthesis,3-phosphoinositide Degradation,cAMP-mediated signaling,D-myo-inositol (1,4,5,6)-Tetrakisphosphate Biosynthesis,D-myo-inositol (3,4,5,6)-tetrakisphosphate Biosynthesis,D-myo-inositol-5-phosphate Metabolism,ERK/MAPK Signaling,G-Protein Coupled Receptor Signaling,MAPK targets/ Nuclear events mediated by MAP kinases,Protein Kinase A Signaling,RAF-independent MAPK1/3 ac…
hsa-miR-155-5p	miR-155-5p (miRNAs w/seed UAAUGCU)	2,493	TargetScan Mouse,TargetScan Human	High (predicted)	DYNC1I1	DYNC1I1	-133,105	Aggrephagy,Cell Cycle Checkpoints,COPI-mediated anterograde transport,HSP90 chaperone cycle for steroid hormone receptors in the presence of ligand,Intra-Golgi and retrograde Golgi-to-ER traffic,MHC class II antigen presentation,Mitotic Metaphase and Anaphase,Mitotic Prometaphase,Phagosome Maturation,RHO GTPases Activate Formins
hsa-miR-409-3p	miR-409-3p (miRNAs w/seed AAUGUUG)	1,226	TargetScan Human	High (predicted)	DYNC2H1	DYNC2H1	-3,160	Cilium Assembly,Hedgehog 'off' state,Phagosome Maturation
hsa-miR-455-3p	miR-455-3p (miRNAs w/seed CAGUCCA)	-3,496	TargetScan Human	High (predicted)	DYNLL1	DYNLL1	-2,988	Aggrephagy,Cell Cycle Checkpoints,Cilium Assembly,COPI-mediated anterograde transport,HSP90 chaperone cycle for steroid hormone receptors in the presence of ligand,Intra-Golgi and retrograde Golgi-to-ER traffic,Intrinsic Pathway for Apoptosis,Macroautophagy,MHC class II antigen presentation,Mitotic G2-G2/M phases,Mitotic Metaphase and Anaphase,Mitotic Prometaphase,Neutrophil degranulation,Phagoso…
hsa-miR-454-3p	miR-130a-3p (and other miRNAs w/seed AGUGCAA)	-24,471	TargetScan Mouse,TargetScan Human	High (predicted)	DYNLL2	DYNLL2	-3,565	Aggrephagy,Cell Cycle Checkpoints,Cilium Assembly,COPI-mediated anterograde transport,HSP90 chaperone cycle for steroid hormone receptors in the presence of ligand,Intra-Golgi and retrograde Golgi-to-ER traffic,Intrinsic Pathway for Apoptosis,Macroautophagy,MHC class II antigen presentation,Mitotic Metaphase and Anaphase,Mitotic Prometaphase,Phagosome Maturation,RHO GTPases Activate Formins
hsa-miR-377-3p	miR-377-3p (miRNAs w/seed UCACACA)	-24,471	TargetScan Human	High (predicted)	DYNLL2	DYNLL2	-3,565	Aggrephagy,Cell Cycle Checkpoints,Cilium Assembly,COPI-mediated anterograde transport,HSP90 chaperone cycle for steroid hormone receptors in the presence of ligand,Intra-Golgi and retrograde Golgi-to-ER traffic,Intrinsic Pathway for Apoptosis,Macroautophagy,MHC class II antigen presentation,Mitotic Metaphase and Anaphase,Mitotic Prometaphase,Phagosome Maturation,RHO GTPases Activate Formins
hsa-miR-654-5p	miR-541-3p (and other miRNAs w/seed GGUGGGC)	-12,236	TargetScan Human	High (predicted)	DYNLL2	DYNLL2	-3,565	Aggrephagy,Cell Cycle Checkpoints,Cilium Assembly,COPI-mediated anterograde transport,HSP90 chaperone cycle for steroid hormone receptors in the presence of ligand,Intra-Golgi and retrograde Golgi-to-ER traffic,Intrinsic Pathway for Apoptosis,Macroautophagy,MHC class II antigen presentation,Mitotic Metaphase and Anaphase,Mitotic Prometaphase,Phagosome Maturation,RHO GTPases Activate Formins
hsa-miR-329-3p	miR-329-3p (and other miRNAs w/seed ACACACC)	-12,236	TargetScan Mouse,TargetScan Human	High (predicted),Moderate (predicted)	E2F1	E2F1	-2,929	Aryl Hydrocarbon Receptor Signaling,Autophagy,BER (Base Excision Repair) Pathway,Bladder Cancer Signaling,Breast Cancer Regulation by Stathmin1,Cell Cycle Regulation by BTG Family Proteins,Cell Cycle: G1/S Checkpoint Regulation,Chronic Myeloid Leukemia Signaling,Coronavirus Pathogenesis Pathway,Cyclins and Cell Cycle Regulation,DNA damage-induced 14-3-3σ Signaling,DNA Methylation and Transcriptio…
hsa-miR-154-5p	miR-154-5p (miRNAs w/seed AGGUUAU)	-8,157	TargetScan Mouse,TargetScan Human	High (predicted)	E2F5	E2F5	-6,777	Bladder Cancer Signaling,Breast Cancer Regulation by Stathmin1,Cell Cycle Regulation by BTG Family Proteins,Cell Cycle: G1/S Checkpoint Regulation,Chronic Myeloid Leukemia Signaling,Coronavirus Pathogenesis Pathway,Cyclins and Cell Cycle Regulation,DNA Methylation and Transcriptional Repression Signaling,Estrogen-mediated S-phase Entry,Glioblastoma Multiforme Signaling,Glioma Signaling,HEY1 Signa…
hsa-miR-376c-5p	miR-376b-5p (and other miRNAs w/seed GUGGAUA)	-24,471	TargetScan Human	High (predicted)	E2F5	E2F5	-6,777	Bladder Cancer Signaling,Breast Cancer Regulation by Stathmin1,Cell Cycle Regulation by BTG Family Proteins,Cell Cycle: G1/S Checkpoint Regulation,Chronic Myeloid Leukemia Signaling,Coronavirus Pathogenesis Pathway,Cyclins and Cell Cycle Regulation,DNA Methylation and Transcriptional Repression Signaling,Estrogen-mediated S-phase Entry,Glioblastoma Multiforme Signaling,Glioma Signaling,HEY1 Signa…
hsa-miR-323a-5p	miR-323-5p (and other miRNAs w/seed GGUGGUC)	-8,157	TargetScan Human	High (predicted)	ECSIT	ECSIT	2,801	Acute Phase Response Signaling,Electron transport, ATP synthesis, and heat production by uncoupling proteins,IL-1 Signaling,LPS/IL-1 Mediated Inhibition of RXR Function,MyD88 cascade initiated on plasma membrane,MyD88 dependent cascade initiated on endosome,MyD88:MAL(TIRAP) cascade initiated on plasma membrane,Toll-like Receptor Signaling
hsa-miR-432-5p	miR-432 (and other miRNAs w/seed CUUGGAG)	-24,471	TargetScan Human	High (predicted)	EDA2R	EDA2R	-6,843	TNFs bind their physiological receptors
hsa-miR-323b-3p	miR-323b-3p (miRNAs w/seed CCAAUAC)	-12,236	TargetScan Human	High (predicted)	EDIL3	EDIL3	34,722	Leukocyte Extravasation Signaling
hsa-miR-496	miR-503-3p (and other miRNAs w/seed GAGUAUU)	-8,157	TargetScan Human	High (predicted)	EDIL3	EDIL3	34,722	Leukocyte Extravasation Signaling
hsa-miR-134-5p	miR-3118 (and other miRNAs w/seed GUGACUG)	-24,471	TargetScan Human	High (predicted)	EDN1	EDN1	59,074	Apelin Liver Signaling Pathway,Cardiac Hypertrophy Signaling (Enhanced),Class A/1 (Rhodopsin-like receptors),Endothelin-1 Signaling,G alpha (q) signalling events,Hepatic Fibrosis / Hepatic Stellate Cell Activation,Hepatic Fibrosis Signaling Pathway,HIF1α Signaling,Hypoxia Signaling in the Cardiovascular System,Molecular Mechanisms of Cancer,Ovarian Cancer Signaling,Pulmonary Fibrosis Idiopathic S…
hsa-miR-625-5p	miR-625-5p (and other miRNAs w/seed GGGGGAA)	-8,157	TargetScan Human	High (predicted)	EDN1	EDN1	59,074	Apelin Liver Signaling Pathway,Cardiac Hypertrophy Signaling (Enhanced),Class A/1 (Rhodopsin-like receptors),Endothelin-1 Signaling,G alpha (q) signalling events,Hepatic Fibrosis / Hepatic Stellate Cell Activation,Hepatic Fibrosis Signaling Pathway,HIF1α Signaling,Hypoxia Signaling in the Cardiovascular System,Molecular Mechanisms of Cancer,Ovarian Cancer Signaling,Pulmonary Fibrosis Idiopathic S…
hsa-let-7a-2-3p	let-7a-2-3p (and other miRNAs w/seed UGUACAG)	2,248	TargetScan Human	High (predicted)	EFEMP1	EFEMP1	2611,456	Elastic fibre formation
hsa-miR-485-5p	miR-485-5p (and other miRNAs w/seed GAGGCUG)	-4,079	TargetScan Mouse,TargetScan Human	High (predicted),Moderate (predicted)	EFNA1	EFNA1	4,665	Axonal Guidance Signaling,EPH-Ephrin signaling,Ephrin A Signaling,Ephrin Receptor Signaling,FAK Signaling,Synaptogenesis Signaling Pathway
hsa-miR-149-5p	miR-149-5p (miRNAs w/seed CUGGCUC)	16,673	TargetScan Human	High (predicted)	EFNA4	EFNA4	24,975	Axonal Guidance Signaling,EPH-Ephrin signaling,Ephrin A Signaling,Ephrin Receptor Signaling,FAK Signaling,Synaptogenesis Signaling Pathway
hsa-miR-654-5p	miR-541-3p (and other miRNAs w/seed GGUGGGC)	-12,236	TargetScan Human	High (predicted)	EFNB1	EFNB1	3,228	Axonal Guidance Signaling,CDX Gastrointestinal Cancer Signaling Pathway,EPH-Ephrin signaling,Ephrin B Signaling,Ephrin Receptor Signaling,FAK Signaling,PCP (Planar Cell Polarity) Pathway,Synaptogenesis Signaling Pathway
hsa-miR-193b-3p	miR-193a-3p (and other miRNAs w/seed ACUGGCC)	-12,236	TargetScan Human	High (predicted)	EFNB2	EFNB2	-4,282	Axonal Guidance Signaling,EPH-Ephrin signaling,Ephrin B Signaling,Ephrin Receptor Signaling,FAK Signaling,Pulmonary Fibrosis Idiopathic Signaling Pathway,Synaptogenesis Signaling Pathway
hsa-miR-134-5p	miR-3118 (and other miRNAs w/seed GUGACUG)	-24,471	TargetScan Human	High (predicted)	EGFR	EGFR	30,848	Agrin Interactions at Neuromuscular Junction,Bladder Cancer Signaling,Cargo recognition for clathrin-mediated endocytosis,Caveolar-mediated Endocytosis Signaling,CDX Gastrointestinal Cancer Signaling Pathway,Cholecystokinin/Gastrin-mediated Signaling,Clathrin-mediated endocytosis,CLEAR Signaling Pathway,Colorectal Cancer Metastasis Signaling,CREB Signaling in Neurons,EGF Signaling,Eicosanoid Sign…
hsa-miR-204-5p	miR-204-5p (and other miRNAs w/seed UCCCUUU)	85,448	TargetScan Mouse,TargetScan Human	High (predicted),Moderate (predicted)	EGR1	EGR1	-13,188	ABRA Signaling Pathway,B Cell Receptor Signaling,CDK5 Signaling,CXCR4 Signaling,Eicosanoid Signaling,GNRH Signaling,ID1 Signaling Pathway,Interferon alpha/beta signaling,NGF-stimulated transcription,PTEN Regulation,Pulmonary Fibrosis Idiopathic Signaling Pathway,Regulation of the Epithelial Mesenchymal Transition by Growth Factors Pathway,Regulation of the Epithelial-Mesenchymal Transition Pathwa…
hsa-miR-625-5p	miR-625-5p (and other miRNAs w/seed GGGGGAA)	-8,157	TargetScan Mouse,TargetScan Human	High (predicted),Moderate (predicted)	EGR3	EGR3	-27,695	NGF-stimulated transcription
hsa-miR-323a-5p	miR-323-5p (and other miRNAs w/seed GGUGGUC)	-8,157	TargetScan Human	High (predicted)	EIF2B5	EIF2B5	-3,149	Cachexia Signaling Pathway,Cardiac Hypertrophy Signaling,Cardiac Hypertrophy Signaling (Enhanced),EIF2 Signaling,Estrogen Receptor Signaling,Eukaryotic Translation Initiation,Insulin Receptor Signaling,Insulin Secretion Signaling Pathway,Regulation of eIF4 and p70S6K Signaling,VEGF Signaling
hsa-miR-376c-5p	miR-376b-5p (and other miRNAs w/seed GUGGAUA)	-24,471	TargetScan Human	High (predicted)	EIF4E	EIF4E	-11,292	Autism Signaling Pathway,Axonal Guidance Signaling,Cardiac Hypertrophy Signaling,Cardiac Hypertrophy Signaling (Enhanced),Circadian Rhythm Signaling,Coronavirus Pathogenesis Pathway,Deadenylation-dependent mRNA decay,EIF2 Signaling,ERK/MAPK Signaling,Estrogen Receptor Signaling,Eukaryotic Translation Initiation,FLT3 Signaling in Hematopoietic Progenitor Cells,Glutaminergic Receptor Signaling Path…
hsa-miR-2682-3p	miR-2682-3p (and other miRNAs w/seed GCCUCUU)	-24,471	TargetScan Human	High (predicted)	EIF4EBP2	EIF4EBP2	2,873	Circadian Rhythm Signaling,Insulin Secretion Signaling Pathway,mTOR Signaling,Pulmonary Fibrosis Idiopathic Signaling Pathway,Regulation of eIF4 and p70S6K Signaling,Synaptogenesis Signaling Pathway
hsa-miR-379-5p	miR-379-5p (and other miRNAs w/seed GGUAGAC)	-2,225	TargetScan Mouse,TargetScan Human	High (predicted)	EIF4G2	EIF4G2	-5,320	EIF2 Signaling,Insulin Secretion Signaling Pathway,ISG15 antiviral mechanism,mTOR Signaling,Regulation of eIF4 and p70S6K Signaling,UFMylation Signaling Pathway
hsa-miR-92b-3p	miR-92a-3p (and other miRNAs w/seed AUUGCAC)	76,008	TargetScan Mouse,TargetScan Human	High (predicted),Moderate (predicted)	EIF4G2	EIF4G2	-5,320	EIF2 Signaling,Insulin Secretion Signaling Pathway,ISG15 antiviral mechanism,mTOR Signaling,Regulation of eIF4 and p70S6K Signaling,UFMylation Signaling Pathway
hsa-miR-505-3p	miR-505-3p (miRNAs w/seed GUCAACA)	-12,236	TargetScan Human	High (predicted)	EMD	EMD	7,208	Insertion of tail-anchored proteins into the endoplasmic reticulum membrane,Mitotic Metaphase and Anaphase,Mitotic Prophase,RHO GTPase cycle
hsa-miR-2116-3p	miR-2116-3p (miRNAs w/seed CUCCCAU)	-24,471	TargetScan Human	High (predicted)	ENSA	ENSA	2,377	Kinetochore Metaphase Signaling Pathway,Mitotic Prophase
hsa-miR-204-5p	miR-204-5p (and other miRNAs w/seed UCCCUUU)	85,448	TargetScan Human	High (predicted)	EPHA5	EPHA5	39,523	Axonal Guidance Signaling,EPH-Ephrin signaling,Ephrin A Signaling,Ephrin Receptor Signaling,IL-15 Production,Sperm Motility,Synaptogenesis Signaling Pathway
hsa-miR-454-3p	miR-130a-3p (and other miRNAs w/seed AGUGCAA)	-24,471	TargetScan Mouse,TargetScan Human	High (predicted),Moderate (predicted)	EPS15	EPS15	-2,895	Cargo recognition for clathrin-mediated endocytosis,Clathrin-mediated endocytosis,Clathrin-mediated Endocytosis Signaling,Signaling by EGFR,Signaling by MET
hsa-miR-197-3p	miR-197-3p (and other miRNAs w/seed UCACCAC)	-2,039	TargetScan Human	High (predicted)	ERLIN2	ERLIN2	-3,524	ABC-family proteins mediated transport
hsa-miR-197-3p	miR-197-3p (and other miRNAs w/seed UCACCAC)	-2,039	TargetScan Human	High (predicted)	ETF1	ETF1	-3,137	Eukaryotic Translation Termination,Nonsense-Mediated Decay (NMD)
hsa-miR-2682-3p	miR-2682-3p (and other miRNAs w/seed GCCUCUU)	-24,471	TargetScan Human	High (predicted)	EVC	EVC	39,791	Hedgehog 'on' state
hsa-miR-204-5p	miR-204-5p (and other miRNAs w/seed UCCCUUU)	85,448	TargetScan Mouse,TargetScan Human	High (predicted),Moderate (predicted)	EVC2	EVC2	4,904	Hedgehog 'on' state
hsa-let-7a-2-3p	let-7a-2-3p (and other miRNAs w/seed UGUACAG)	2,248	TargetScan Human	High (predicted)	EXOC1	EXOC1	-2,535	CDC42 Signaling,Cilium Assembly,Insulin processing,Translocation of SLC2A4 (GLUT4) to the plasma membrane
hsa-miR-660-5p	miR-660-5p (and other miRNAs w/seed ACCCAUU)	-24,471	TargetScan Human	High (predicted)	EXOC1	EXOC1	-2,535	CDC42 Signaling,Cilium Assembly,Insulin processing,Translocation of SLC2A4 (GLUT4) to the plasma membrane
hsa-miR-149-5p	miR-149-5p (miRNAs w/seed CUGGCUC)	16,673	TargetScan Human	High (predicted)	EXOC4	EXOC4	-4,760	CDC42 Signaling,Cilium Assembly,Insulin processing,Translocation of SLC2A4 (GLUT4) to the plasma membrane
hsa-miR-4448	miR-4448 (miRNAs w/seed GCUCCUU)	2,738	TargetScan Human	High (predicted)	EXOC7	EXOC7	2,799	CDC42 Signaling,Cilium Assembly,Insulin processing,Translocation of SLC2A4 (GLUT4) to the plasma membrane
hsa-miR-370-3p	miR-370-3p (and other miRNAs w/seed CCUGCUG)	-6,118	TargetScan Human	High (predicted)	F2RL2	F2RL2	38,671	BBSome Signaling Pathway,Breast Cancer Regulation by Stathmin1,Class A/1 (Rhodopsin-like receptors),CREB Signaling in Neurons,FAK Signaling,G alpha (q) signalling events,G-Protein Coupled Receptor Signaling,Gα12/13 Signaling,Molecular Mechanisms of Cancer,p70S6K Signaling,Phagosome Formation,S100 Family Signaling Pathway,Thrombin Signaling,Thrombin signalling through proteinase activated receptor…
hsa-miR-485-5p	miR-485-5p (and other miRNAs w/seed GAGGCUG)	-4,079	TargetScan Mouse,TargetScan Human	High (predicted),Moderate (predicted)	F2RL2	F2RL2	38,671	BBSome Signaling Pathway,Breast Cancer Regulation by Stathmin1,Class A/1 (Rhodopsin-like receptors),CREB Signaling in Neurons,FAK Signaling,G alpha (q) signalling events,G-Protein Coupled Receptor Signaling,Gα12/13 Signaling,Molecular Mechanisms of Cancer,p70S6K Signaling,Phagosome Formation,S100 Family Signaling Pathway,Thrombin Signaling,Thrombin signalling through proteinase activated receptor…
hsa-miR-654-5p	miR-541-3p (and other miRNAs w/seed GGUGGGC)	-12,236	TargetScan Human	High (predicted)	F2RL3	F2RL3	33,803	BBSome Signaling Pathway,Breast Cancer Regulation by Stathmin1,Class A/1 (Rhodopsin-like receptors),CREB Signaling in Neurons,FAK Signaling,G alpha (q) signalling events,G-Protein Coupled Receptor Signaling,Gα12/13 Signaling,Molecular Mechanisms of Cancer,p70S6K Signaling,Phagosome Formation,S100 Family Signaling Pathway,Thrombin Signaling,Thrombin signalling through proteinase activated receptor…
hsa-miR-92b-3p	miR-92a-3p (and other miRNAs w/seed AUUGCAC)	76,008	TargetScan Mouse,TargetScan Human	High (predicted),Moderate (predicted)	FAM135A	FAM135A	-6,141	RHO GTPase cycle
hsa-miR-3130-5p	miR-3130-5p (and other miRNAs w/seed ACCCAGU)	-24,471	TargetScan Human	High (predicted)	FAS	FAS	53,967	Allograft Rejection Signaling,Altered T Cell and B Cell Signaling in Rheumatoid Arthritis,Apelin Liver Signaling Pathway,Apoptosis Signaling,Aryl Hydrocarbon Receptor Signaling,Autoimmune Thyroid Disease Signaling,Caspase activation via Death Receptors in the presence of ligand,CCR5 Signaling in Macrophages,Chronic Myeloid Leukemia Signaling,Crosstalk between Dendritic Cells and Natural Killer Ce…
hsa-miR-214-3p	miR-214-3p (and other miRNAs w/seed CAGCAGG)	-4,894	TargetScan Mouse,TargetScan Human	High (predicted)	FBLN5	FBLN5	-627,662	Elastic fibre formation
hsa-miR-625-5p	miR-625-5p (and other miRNAs w/seed GGGGGAA)	-8,157	TargetScan Human	High (predicted)	FBN1	FBN1	984,124	Degradation of the extracellular matrix,Elastic fibre formation,Integrin cell surface interactions,Post-translational protein phosphorylation,Regulation of Insulin-like Growth Factor (IGF) transport and uptake by IGFBPs,Signaling by TGF-beta Receptor Complex
hsa-miR-204-5p	miR-204-5p (and other miRNAs w/seed UCCCUUU)	85,448	TargetScan Human,miRecords	Experimentally Observed,Moderate (predicted)	FBN2	FBN2	301,443	Degradation of the extracellular matrix,Elastic fibre formation
hsa-miR-137-3p	miR-137-3p (miRNAs w/seed UAUUGCU)	-8,157	TargetScan Human	High (predicted)	FBXL12	FBXL12	5,382	Class I MHC mediated antigen processing and presentation,Neddylation
hsa-miR-485-5p	miR-485-5p (and other miRNAs w/seed GAGGCUG)	-4,079	TargetScan Human	High (predicted)	FBXL12	FBXL12	5,382	Class I MHC mediated antigen processing and presentation,Neddylation
hsa-miR-193a-5p	miR-193a-5p (miRNAs w/seed GGGUCUU)	-24,471	TargetScan Human	High (predicted)	FBXO17	FBXO17	78,008	Class I MHC mediated antigen processing and presentation,Neddylation
hsa-miR-431-5p	miR-431-5p (and other miRNAs w/seed GUCUUGC)	-6,118	TargetScan Mouse,TargetScan Human	High (predicted),Moderate (predicted)	FBXO27	FBXO27	39,536	Class I MHC mediated antigen processing and presentation,Neddylation
hsa-miR-214-3p	miR-214-3p (and other miRNAs w/seed CAGCAGG)	-4,894	TargetScan Human	High (predicted)	FBXO44	FBXO44	84,533	Class I MHC mediated antigen processing and presentation,Neddylation
hsa-miR-92b-3p	miR-92a-3p (and other miRNAs w/seed AUUGCAC)	76,008	TargetScan Mouse,Ingenuity Expert Findings,TargetScan Human	Experimentally Observed,High (predicted)	FBXW7	FBXW7	-3,257	Adipogenesis pathway,Class I MHC mediated antigen processing and presentation,Mitochondrial Dysfunction,Neddylation,Protein folding,Protein Ubiquitination Pathway,Regulation of RUNX2 expression and activity,Signaling by NOTCH1,Signaling by NOTCH4
hsa-miR-625-5p	miR-625-5p (and other miRNAs w/seed GGGGGAA)	-8,157	TargetScan Human	High (predicted)	FBXW8	FBXW8	-9,975	Class I MHC mediated antigen processing and presentation,Neddylation
hsa-miR-660-5p	miR-660-5p (and other miRNAs w/seed ACCCAUU)	-24,471	TargetScan Human	High (predicted)	FGF16	FGF16	67,998	Actin Cytoskeleton Signaling,Airway Pathology in Chronic Obstructive Pulmonary Disease,Bladder Cancer Signaling,Cardiac Hypertrophy Signaling (Enhanced),Clathrin-mediated Endocytosis Signaling,FGF Signaling,PI3K Cascade,PIP3 activates AKT signaling,RAF/MAP kinase cascade,Regulation of the Epithelial Mesenchymal Transition by Growth Factors Pathway,Regulation of the Epithelial-Mesenchymal Transiti…
hsa-miR-431-5p	miR-431-5p (and other miRNAs w/seed GUCUUGC)	-6,118	TargetScan Human	High (predicted)	FGF5	FGF5	120,088	Actin Cytoskeleton Signaling,Airway Pathology in Chronic Obstructive Pulmonary Disease,Bladder Cancer Signaling,Cardiac Hypertrophy Signaling (Enhanced),Clathrin-mediated Endocytosis Signaling,FGF Signaling,PI3K Cascade,PIP3 activates AKT signaling,RAF/MAP kinase cascade,Regulation of the Epithelial Mesenchymal Transition by Growth Factors Pathway,Regulation of the Epithelial-Mesenchymal Transiti…
hsa-miR-149-5p	miR-149-5p (miRNAs w/seed CUGGCUC)	16,673	TargetScan Mouse,TargetScan Human	High (predicted),Moderate (predicted)	FKBP1B	FKBP1B	68,388	Cardiac conduction,Ion channel transport
hsa-miR-654-3p	miR-654-3p (and other miRNAs w/seed AUGUCUG)	-6,118	TargetScan Mouse,TargetScan Human	High (predicted),Moderate (predicted)	FKBP1B	FKBP1B	68,388	Cardiac conduction,Ion channel transport
hsa-miR-99a-5p	miR-100-5p (and other miRNAs w/seed ACCCGUA)	7,437	TargetScan Human	High (predicted)	FKBP5	FKBP5	-7,594	ESR-mediated signaling,Glucocorticoid Receptor Signaling,HSP90 chaperone cycle for steroid hormone receptors in the presence of ligand,NRF2-mediated Oxidative Stress Response,Transcriptional Regulation by MECP2
hsa-miR-485-5p	miR-485-5p (and other miRNAs w/seed GAGGCUG)	-4,079	TargetScan Human	High (predicted)	FLOT1	FLOT1	3,115	Caveolar-mediated Endocytosis Signaling,RHO GTPase cycle,RIPK1-mediated regulated necrosis,Synaptic adhesion-like molecules
hsa-miR-625-5p	miR-625-5p (and other miRNAs w/seed GGGGGAA)	-8,157	TargetScan Human	High (predicted)	FLOT2	FLOT2	436,747	Caveolar-mediated Endocytosis Signaling,RHO GTPase cycle,RIPK1-mediated regulated necrosis,Synaptic adhesion-like molecules
hsa-let-7a-2-3p	let-7a-2-3p (and other miRNAs w/seed UGUACAG)	2,248	TargetScan Mouse,TargetScan Human	High (predicted),Moderate (predicted)	FLRT3	FLRT3	-224,111	Signaling by FGFR1,Signaling by ROBO receptors
hsa-miR-654-5p	miR-541-3p (and other miRNAs w/seed GGUGGGC)	-12,236	TargetScan Human	High (predicted)	FLT4	FLT4	-5,279	CLEAR Signaling Pathway,CREB Signaling in Neurons,eNOS Signaling,FAK Signaling,Hepatic Fibrosis / Hepatic Stellate Cell Activation,Hepatic Fibrosis Signaling Pathway,HIF1α Signaling,IL-15 Production,IL-8 Signaling,NF-κB Signaling,Nitric Oxide Signaling in the Cardiovascular System,PTEN Signaling,ROBO SLIT Signaling Pathway,Role of Tissue Factor in Cancer,Signaling by NOTCH4,Signaling by VEGF,Sper…
hsa-miR-155-5p	miR-155-5p (miRNAs w/seed UAAUGCU)	2,493	TargetScan Human	High (predicted)	FOS	FOS	-4,145	14-3-3-mediated Signaling,ABRA Signaling Pathway,Activin Inhibin Signaling Pathway,Acute Phase Response Signaling,Adrenomedullin signaling pathway,Apelin Endothelial Signaling Pathway,April Mediated Signaling,Aryl Hydrocarbon Receptor Signaling,Autophagy,B Cell Activating Factor Signaling,CCR5 Signaling in Macrophages,CD27 Signaling in Lymphocytes,CD28 Signaling in T Helper Cells,CD40 Signaling,C…
hsa-miR-424-3p	miR-424-3p (miRNAs w/seed AAAACGU)	-12,236	TargetScan Human	High (predicted)	FOS	FOS	-4,145	14-3-3-mediated Signaling,ABRA Signaling Pathway,Activin Inhibin Signaling Pathway,Acute Phase Response Signaling,Adrenomedullin signaling pathway,Apelin Endothelial Signaling Pathway,April Mediated Signaling,Aryl Hydrocarbon Receptor Signaling,Autophagy,B Cell Activating Factor Signaling,CCR5 Signaling in Macrophages,CD27 Signaling in Lymphocytes,CD28 Signaling in T Helper Cells,CD40 Signaling,C…
hsa-miR-3152-5p	miR-3152-5p (miRNAs w/seed UUGCCUC)	-24,471	TargetScan Human	High (predicted)	FOSB	FOSB	-6,772	ABRA Signaling Pathway,Activin Inhibin Signaling Pathway,CDK5 Signaling,ESR-mediated signaling,NGF-stimulated transcription,Opioid Signaling Pathway,Sertoli Cell-Germ Cell Junction Signaling Pathway (Enhanced)
hsa-miR-454-3p	miR-130a-3p (and other miRNAs w/seed AGUGCAA)	-24,471	TargetScan Human	High (predicted)	FOSL1	FOSL1	1,867	Activin Inhibin Signaling Pathway,ERK5 Signaling,NGF-stimulated transcription,NRF2-mediated Oxidative Stress Response,Sertoli Cell-Germ Cell Junction Signaling Pathway (Enhanced)
hsa-miR-654-5p	miR-541-3p (and other miRNAs w/seed GGUGGGC)	-12,236	TargetScan Human	High (predicted)	FOSL1	FOSL1	1,867	Activin Inhibin Signaling Pathway,ERK5 Signaling,NGF-stimulated transcription,NRF2-mediated Oxidative Stress Response,Sertoli Cell-Germ Cell Junction Signaling Pathway (Enhanced)
hsa-miR-505-3p	miR-505-3p (miRNAs w/seed GUCAACA)	-12,236	TargetScan Mouse,TargetScan Human	High (predicted)	FST	FST	-75,081	Activin Inhibin Signaling Pathway,BMP signaling pathway,Signaling by Activin
hsa-miR-625-5p	miR-625-5p (and other miRNAs w/seed GGGGGAA)	-8,157	TargetScan Mouse,TargetScan Human	High (predicted),Moderate (predicted)	FST	FST	-75,081	Activin Inhibin Signaling Pathway,BMP signaling pathway,Signaling by Activin
hsa-miR-2682-3p	miR-2682-3p (and other miRNAs w/seed GCCUCUU)	-24,471	TargetScan Human	High (predicted)	FSTL3	FSTL3	73,207	Activin Inhibin Signaling Pathway,Post-translational protein phosphorylation,Regulation of Insulin-like Growth Factor (IGF) transport and uptake by IGFBPs,Signaling by Activin
hsa-miR-99a-5p	miR-100-5p (and other miRNAs w/seed ACCCGUA)	7,437	TargetScan Mouse,TargetScan Human	High (predicted)	FZD8	FZD8	3,569	Adipogenesis pathway,Autism Signaling Pathway,Axonal Guidance Signaling,Basal Cell Carcinoma Signaling,BBSome Signaling Pathway,Beta-catenin independent WNT signaling,Breast Cancer Regulation by Stathmin1,Cardiac Hypertrophy Signaling (Enhanced),CDX Gastrointestinal Cancer Signaling Pathway,Chronic Myeloid Leukemia Signaling,Class B/2 (Secretin family receptors),Colorectal Cancer Metastasis Signa…
hsa-miR-197-3p	miR-197-3p (and other miRNAs w/seed UCACCAC)	-2,039	TargetScan Human	High (predicted)	GAB2	GAB2	4,643	B Cell Receptor Signaling,Chronic Myeloid Leukemia Signaling,Fc epsilon receptor (FCERI) signaling,Fcγ Receptor-mediated Phagocytosis in Macrophages and Monocytes,FLT3 Signaling,FLT3 Signaling in Hematopoietic Progenitor Cells,ICOS-ICOSL Signaling in T Helper Cells,IL-3 Signaling,Interleukin-15 signaling,Interleukin-2 family signaling,Interleukin-3, Interleukin-5 and GM-CSF signaling,Molecular Me…
hsa-miR-155-5p	miR-155-5p (miRNAs w/seed UAAUGCU)	2,493	TargetScan Human	High (predicted)	GABARAPL1	GABARAPL1	4,459	Autophagy,Cachexia Signaling Pathway,Macroautophagy,Sirtuin Signaling Pathway
hsa-miR-625-5p	miR-625-5p (and other miRNAs w/seed GGGGGAA)	-8,157	TargetScan Human	High (predicted)	GABBR1	GABBR1	-4,398	BBSome Signaling Pathway,Breast Cancer Regulation by Stathmin1,cAMP-mediated signaling,Class C/3 (Metabotropic glutamate/pheromone receptors),CREB Signaling in Neurons,FAK Signaling,G alpha (i) signalling events,G-Protein Coupled Receptor Signaling,GABA receptor activation,GABA Receptor Signaling,GABAergic Receptor Signaling Pathway (Enhanced),Glutaminergic Receptor Signaling Pathway (Enhanced),G…
hsa-miR-454-3p	miR-130a-3p (and other miRNAs w/seed AGUGCAA)	-24,471	TargetScan Mouse,TargetScan Human	High (predicted),Moderate (predicted)	GADD45A	GADD45A	4,094	ATM Signaling,Cell Cycle: G2/M DNA Damage Checkpoint Regulation,DNA Methylation and Transcriptional Repression Signaling,FOXO-mediated transcription of cell cycle genes,GADD45 Signaling,Hereditary Breast Cancer Signaling,p53 Signaling,Role of BRCA1 in DNA Damage Response,SAPK/JNK Signaling,Senescence Pathway,Sirtuin Signaling Pathway,Systemic Lupus Erythematosus in T Cell Signaling Pathway,TP53 R…
hsa-miR-377-3p	miR-377-3p (miRNAs w/seed UCACACA)	-24,471	TargetScan Mouse,TargetScan Human	High (predicted),Moderate (predicted)	GAN	GAN	3,252	Class I MHC mediated antigen processing and presentation,Neddylation
hsa-miR-2116-3p	miR-2116-3p (miRNAs w/seed CUCCCAU)	-24,471	TargetScan Human	High (predicted)	GATA3	GATA3	10,881	Deubiquitination,ESR-mediated signaling,Factors involved in megakaryocyte development and platelet production,HEY1 Signaling Pathway,IL-12 Signaling and Production in Macrophages,IL-27 Signaling Pathway,IL-33 Signaling Pathway,IL-4 Signaling,Interleukin-4 and Interleukin-13 signaling,T Helper Cell Differentiation,Th1 and Th2 Activation Pathway,Th1 Pathway,Th2 Pathway,Thrombin Signaling,Transcript…
hsa-miR-625-5p	miR-625-5p (and other miRNAs w/seed GGGGGAA)	-8,157	TargetScan Mouse,TargetScan Human	High (predicted),Moderate (predicted)	GATAD2B	GATAD2B	-2,790	DNA Methylation and Transcriptional Repression Signaling,ERCC6 (CSB) and EHMT2 (G9a) positively regulate rRNA expression,PTEN Regulation,Regulation of TP53 Activity through Acetylation,RNA Polymerase I Transcription
hsa-miR-193b-3p	miR-193a-3p (and other miRNAs w/seed ACUGGCC)	-12,236	TargetScan Mouse,TargetScan Human	High (predicted),Moderate (predicted)	GBA2	GBA2	6,335	Protein Sorting Signaling Pathway,Sphingolipid metabolism
hsa-miR-4448	miR-4448 (miRNAs w/seed GCUCCUU)	2,738	TargetScan Human	High (predicted)	GDE1	GDE1	2,960	cAMP-mediated signaling,Cardiac Hypertrophy Signaling (Enhanced),Cardiac β-adrenergic Signaling,G-Protein Coupled Receptor Signaling,PI Metabolism,Protein Kinase A Signaling,RAR Activation,Relaxin Signaling,tRNA Splicing
hsa-miR-625-5p	miR-625-5p (and other miRNAs w/seed GGGGGAA)	-8,157	TargetScan Human	High (predicted)	GDI1	GDI1	-2,345	RAB GEFs exchange GTP for GDP on RABs
hsa-miR-155-5p	miR-155-5p (miRNAs w/seed UAAUGCU)	2,493	TargetScan Human	High (predicted)	GDPD1	GDPD1	-8,660	cAMP-mediated signaling,Cardiac Hypertrophy Signaling (Enhanced),Cardiac β-adrenergic Signaling,G-Protein Coupled Receptor Signaling,PI Metabolism,Protein Kinase A Signaling,RAR Activation,Relaxin Signaling,tRNA Splicing
hsa-miR-329-3p	miR-329-3p (and other miRNAs w/seed ACACACC)	-12,236	TargetScan Mouse,TargetScan Human	High (predicted),Moderate (predicted)	GDPD1	GDPD1	-8,660	cAMP-mediated signaling,Cardiac Hypertrophy Signaling (Enhanced),Cardiac β-adrenergic Signaling,G-Protein Coupled Receptor Signaling,PI Metabolism,Protein Kinase A Signaling,RAR Activation,Relaxin Signaling,tRNA Splicing
hsa-miR-887-3p	miR-887-3p (miRNAs w/seed UGAACGG)	-12,236	TargetScan Human	High (predicted)	GFOD1	GFOD1	2,651	RHO GTPase cycle
hsa-miR-3615	miR-3615 (miRNAs w/seed CUCUCGG)	-12,236	TargetScan Human	High (predicted)	GIT1	GIT1	-2,678	Actin Cytoskeleton Signaling,Activation of NMDA receptors and postsynaptic events,Axonal Guidance Signaling,EPH-Ephrin signaling,FAK Signaling,Integrin Signaling,PAK Signaling,RHO GTPase cycle,ROBO SLIT Signaling Pathway
hsa-miR-127-3p	miR-127-3p (miRNAs w/seed CGGAUCC)	50,550	TargetScan Human	High (predicted)	GJD3	GJD3	39,521	Gap Junction Signaling
hsa-miR-654-5p	miR-541-3p (and other miRNAs w/seed GGUGGGC)	-12,236	TargetScan Human	High (predicted)	GJD3	GJD3	39,521	Gap Junction Signaling
hsa-miR-323a-5p	miR-323-5p (and other miRNAs w/seed GGUGGUC)	-8,157	TargetScan Human	High (predicted)	GLRX3	GLRX3	-2,209	Iron uptake and transport
hsa-miR-654-5p	miR-541-3p (and other miRNAs w/seed GGUGGGC)	-12,236	TargetScan Human	High (predicted)	GLRX3	GLRX3	-2,209	Iron uptake and transport
hsa-miR-485-3p	miR-485-3p (and other miRNAs w/seed UCAUACA)	-12,236	TargetScan Human	High (predicted)	GNA14	GNA14	7,309	Acetylcholine Receptor Signaling Pathway,Adrenomedullin signaling pathway,AMPK Signaling,Androgen Signaling,Apelin Endothelial Signaling Pathway,Apelin Muscle Signaling Pathway,Axonal Guidance Signaling,Cardiac Hypertrophy Signaling,Cardiac Hypertrophy Signaling (Enhanced),Cardiac β-adrenergic Signaling,CCR3 Signaling in Eosinophils,CCR5 Signaling in Macrophages,Circadian Rhythm Signaling,Colorec…
hsa-miR-625-5p	miR-625-5p (and other miRNAs w/seed GGGGGAA)	-8,157	TargetScan Mouse,TargetScan Human	High (predicted),Moderate (predicted)	GNAI3	GNAI3	-2,310	Acetylcholine Receptor Signaling Pathway,Adrenergic Receptor Signaling Pathway (Enhanced),Agranulocyte Adhesion and Diapedesis,AMPK Signaling,Androgen Signaling,Apelin Adipocyte Signaling Pathway,Apelin Cardiomyocyte Signaling Pathway,Apelin Endothelial Signaling Pathway,Apelin Muscle Signaling Pathway,Autophagy,Axonal Guidance Signaling,cAMP-mediated signaling,Cardiac Hypertrophy Signaling,Cardi…
hsa-miR-92b-3p	miR-92a-3p (and other miRNAs w/seed AUUGCAC)	76,008	TargetScan Mouse,TargetScan Human	High (predicted),Moderate (predicted)	GNAQ	GNAQ	-4,878	Acetylcholine Receptor Signaling Pathway,Adrenergic Receptor Signaling Pathway (Enhanced),Adrenomedullin signaling pathway,AMPK Signaling,Androgen Signaling,Apelin Endothelial Signaling Pathway,Apelin Muscle Signaling Pathway,Axonal Guidance Signaling,Breast Cancer Regulation by Stathmin1,Cardiac Hypertrophy Signaling,Cardiac Hypertrophy Signaling (Enhanced),Cardiac β-adrenergic Signaling,CCR3 Si…
hsa-miR-493-5p	miR-493-5p (miRNAs w/seed UGUACAU)	-24,471	TargetScan Human	High (predicted)	GNG11	GNG11	15,164	Activation of kainate receptors upon glutamate binding,AMPK Signaling,Androgen Signaling,Antiproliferative Role of Somatostatin Receptor 2,Apelin Endothelial Signaling Pathway,Apelin Muscle Signaling Pathway,Axonal Guidance Signaling,Beta-catenin independent WNT signaling,Breast Cancer Regulation by Stathmin1,Cardiac Hypertrophy Signaling,Cardiac Hypertrophy Signaling (Enhanced),Cardiac β-adrener…
hsa-miR-181a-2-3p	miR-181a-2-3p (and other miRNAs w/seed CCACUGA)	-24,471	TargetScan Human	High (predicted)	GOLGA4	GOLGA4	3,111	Intra-Golgi and retrograde Golgi-to-ER traffic,Protein Sorting Signaling Pathway
hsa-miR-199a-3p	miR-199a-3p (and other miRNAs w/seed CAGUAGU)	-1,224	TargetScan Mouse,TargetScan Human	High (predicted),Moderate (predicted)	GOLGA4	GOLGA4	3,111	Intra-Golgi and retrograde Golgi-to-ER traffic,Protein Sorting Signaling Pathway
hsa-miR-92b-3p	miR-92a-3p (and other miRNAs w/seed AUUGCAC)	76,008	TargetScan Mouse,TargetScan Human	High (predicted)	GOLGA4	GOLGA4	3,111	Intra-Golgi and retrograde Golgi-to-ER traffic,Protein Sorting Signaling Pathway
hsa-miR-935	miR-935 (miRNAs w/seed CAGUUAC)	4,781	TargetScan Human	High (predicted)	GOPC	GOPC	-2,417	RHO GTPase cycle,RHO GTPases regulate CFTR trafficking
hsa-miR-137-3p	miR-137-3p (miRNAs w/seed UAUUGCU)	-8,157	TargetScan Mouse,TargetScan Human	High (predicted)	GPR137B	GPR137B	-18,284	BBSome Signaling Pathway,Breast Cancer Regulation by Stathmin1,CREB Signaling in Neurons,FAK Signaling,G-Protein Coupled Receptor Signaling,Molecular Mechanisms of Cancer,Phagosome Formation,S100 Family Signaling Pathway
hsa-miR-323a-5p	miR-323-5p (and other miRNAs w/seed GGUGGUC)	-8,157	TargetScan Mouse,TargetScan Human	High (predicted)	GPR153	GPR153	27,150	BBSome Signaling Pathway,Breast Cancer Regulation by Stathmin1,CREB Signaling in Neurons,FAK Signaling,G-Protein Coupled Receptor Signaling,Molecular Mechanisms of Cancer,Phagosome Formation,S100 Family Signaling Pathway
hsa-miR-654-5p	miR-541-3p (and other miRNAs w/seed GGUGGGC)	-12,236	TargetScan Human	High (predicted)	GPR173	GPR173	44,333	BBSome Signaling Pathway,Breast Cancer Regulation by Stathmin1,CREB Signaling in Neurons,FAK Signaling,G-Protein Coupled Receptor Signaling,Molecular Mechanisms of Cancer,Phagosome Formation,S100 Family Signaling Pathway
hsa-miR-382-5p	miR-382-5p (miRNAs w/seed AAGUUGU)	-1,631	TargetScan Human	High (predicted)	GPR176	GPR176	73,190	BBSome Signaling Pathway,Breast Cancer Regulation by Stathmin1,CREB Signaling in Neurons,FAK Signaling,G alpha (s) signalling events,G-Protein Coupled Receptor Signaling,Molecular Mechanisms of Cancer,Phagosome Formation,S100 Family Signaling Pathway
hsa-miR-485-5p	miR-485-5p (and other miRNAs w/seed GAGGCUG)	-4,079	TargetScan Human	High (predicted)	GPR4	GPR4	72,342	BBSome Signaling Pathway,Breast Cancer Regulation by Stathmin1,Class A/1 (Rhodopsin-like receptors),CREB Signaling in Neurons,FAK Signaling,G alpha (q) signalling events,G-Protein Coupled Receptor Signaling,Molecular Mechanisms of Cancer,Phagosome Formation,S100 Family Signaling Pathway
hsa-miR-377-3p	miR-377-3p (miRNAs w/seed UCACACA)	-24,471	TargetScan Human	High (predicted)	GPSM3	GPSM3	16,425	G alpha (i) signalling events
hsa-miR-379-5p	miR-379-5p (and other miRNAs w/seed GGUAGAC)	-2,225	TargetScan Human	High (predicted)	GPX3	GPX3	287,816	Apelin Adipocyte Signaling Pathway,Detoxification of Reactive Oxygen Species,Glutathione Redox Reactions I,Mitochondrial Dysfunction
hsa-miR-935	miR-935 (miRNAs w/seed CAGUUAC)	4,781	TargetScan Human	High (predicted)	GPX3	GPX3	287,816	Apelin Adipocyte Signaling Pathway,Detoxification of Reactive Oxygen Species,Glutathione Redox Reactions I,Mitochondrial Dysfunction
hsa-miR-214-3p	miR-214-3p (and other miRNAs w/seed CAGCAGG)	-4,894	TargetScan Mouse,TargetScan Human	High (predicted),Moderate (predicted)	GPX4	GPX4	2,291	Apelin Adipocyte Signaling Pathway,Arachidonic acid metabolism,Chaperone Mediated Autophagy Signaling Pathway,Ferroptosis Signaling Pathway,Glutathione Redox Reactions I,Mitochondrial Dysfunction,UFMylation Signaling Pathway
hsa-miR-130b-5p	miR-130b-5p (and other miRNAs w/seed CUCUUUC)	-1,165	TargetScan Human	High (predicted)	GPX8	GPX8	14,305	Apelin Adipocyte Signaling Pathway,Detoxification of Reactive Oxygen Species,Glutathione Redox Reactions I,Mitochondrial Dysfunction
hsa-miR-193a-5p	miR-193a-5p (miRNAs w/seed GGGUCUU)	-24,471	TargetScan Mouse,TargetScan Human	High (predicted),Moderate (predicted)	GRAP	GRAP	2,165	Signaling by SCF-KIT
hsa-miR-127-3p	miR-127-3p (miRNAs w/seed CGGAUCC)	50,550	TargetScan Human	High (predicted)	GRK2	GRK2	-2,096	cAMP-mediated signaling,Cardiac β-adrenergic Signaling,Cargo recognition for clathrin-mediated endocytosis,Colorectal Cancer Metastasis Signaling,DAG and IP3 signaling,G alpha (q) signalling events,G alpha (s) signalling events,G-Protein Coupled Receptor Signaling,Gαq Signaling,Hedgehog 'on' state,Opioid Signaling Pathway,Opioid Signalling,Sonic Hedgehog Signaling
hsa-miR-214-3p	miR-214-3p (and other miRNAs w/seed CAGCAGG)	-4,894	TargetScan Human	High (predicted)	GRK2	GRK2	-2,096	cAMP-mediated signaling,Cardiac β-adrenergic Signaling,Cargo recognition for clathrin-mediated endocytosis,Colorectal Cancer Metastasis Signaling,DAG and IP3 signaling,G alpha (q) signalling events,G alpha (s) signalling events,G-Protein Coupled Receptor Signaling,Gαq Signaling,Hedgehog 'on' state,Opioid Signaling Pathway,Opioid Signalling,Sonic Hedgehog Signaling
hsa-miR-379-5p	miR-379-5p (and other miRNAs w/seed GGUAGAC)	-2,225	TargetScan Human	High (predicted)	GSDMD	GSDMD	25,065	CGAS-STING Signaling Pathway,Interleukin-1 processing,Intrinsic Pathway for Apoptosis,Neutrophil degranulation,Neutrophil Extracellular Trap Signaling Pathway,Pathogen Induced Cytokine Storm Signaling Pathway,Pyroptosis,Pyroptosis Signaling Pathway,Regulation of TLR by endogenous ligand
hsa-miR-654-5p	miR-541-3p (and other miRNAs w/seed GGUGGGC)	-12,236	TargetScan Human	High (predicted)	GSDMD	GSDMD	25,065	CGAS-STING Signaling Pathway,Interleukin-1 processing,Intrinsic Pathway for Apoptosis,Neutrophil degranulation,Neutrophil Extracellular Trap Signaling Pathway,Pathogen Induced Cytokine Storm Signaling Pathway,Pyroptosis,Pyroptosis Signaling Pathway,Regulation of TLR by endogenous ligand
hsa-miR-377-3p	miR-377-3p (miRNAs w/seed UCACACA)	-24,471	TargetScan Mouse,TargetScan Human	High (predicted),Moderate (predicted)	GSK3B	GSK3B	-3,396	14-3-3-mediated Signaling,Activin Inhibin Signaling Pathway,Adrenomedullin signaling pathway,Amyloid Processing,Apelin Liver Signaling Pathway,Autism Signaling Pathway,Autophagy,Axonal Guidance Signaling,B Cell Receptor Signaling,B-WICH complex positively regulates rRNA expression,Basal Cell Carcinoma Signaling,BEX2 Signaling Pathway,Cachexia Signaling Pathway,Cardiac Hypertrophy Signaling,Cardia…
hsa-miR-625-5p	miR-625-5p (and other miRNAs w/seed GGGGGAA)	-8,157	TargetScan Mouse,TargetScan Human	High (predicted)	GSPT1	GSPT1	-3,949	Eukaryotic Translation Termination,ID1 Signaling Pathway,Nonsense-Mediated Decay (NMD)
hsa-miR-376c-3p	miR-376c-3p (and other miRNAs w/seed ACAUAGA)	-4,079	TargetScan Human	High (predicted)	GSTA4	GSTA4	49,436	Aryl Hydrocarbon Receptor Signaling,FXR/RXR Activation,Glutathione-mediated Detoxification,LPS/IL-1 Mediated Inhibition of RXR Function,NRF2-mediated Oxidative Stress Response,Xenobiotic Metabolism AHR Signaling Pathway,Xenobiotic Metabolism CAR Signaling Pathway,Xenobiotic Metabolism General Signaling Pathway,Xenobiotic Metabolism PXR Signaling Pathway,Xenobiotic Metabolism Signaling
hsa-miR-137-3p	miR-137-3p (miRNAs w/seed UAUUGCU)	-8,157	TargetScan Human	High (predicted)	GSTO1	GSTO1	3,935	Antioxidant Action of Vitamin C,Arsenate Detoxification I (Glutaredoxin),Aryl Hydrocarbon Receptor Signaling,Ascorbate Recycling (Cytosolic),FXR/RXR Activation,Gene and protein expression by JAK-STAT signaling after IL-12 stimulation,Glutathione-mediated Detoxification,LPS/IL-1 Mediated Inhibition of RXR Function,Metabolism of water-soluble vitamins and cofactors,NRF2-mediated Oxidative Stress Re…
hsa-let-7a-2-3p	let-7a-2-3p (and other miRNAs w/seed UGUACAG)	2,248	TargetScan Human	High (predicted)	GYG1	GYG1	-2,613	Glycogen Biosynthesis II (from UDP-D-Glucose),Glycogen metabolism,Neutrophil degranulation
hsa-miR-155-5p	miR-155-5p (miRNAs w/seed UAAUGCU)	2,493	TargetScan Human	High (predicted)	GYG1	GYG1	-2,613	Glycogen Biosynthesis II (from UDP-D-Glucose),Glycogen metabolism,Neutrophil degranulation
hsa-miR-134-5p	miR-3118 (and other miRNAs w/seed GUGACUG)	-24,471	TargetScan Human	High (predicted)	H2AC19	H2AC18/H2AC19	49,150	Ferroptosis Signaling Pathway,IL-33 Signaling Pathway,Kinetochore Metaphase Signaling Pathway
hsa-miR-214-3p	miR-214-3p (and other miRNAs w/seed CAGCAGG)	-4,894	TargetScan Human	High (predicted)	H2AC6	H2AC6	73,807	Activated PKN1 stimulates transcription of AR regulated genes KLK2 and KLK3,Activation of anterior HOX genes in hindbrain during early embryogenesis,Amyloid fiber formation,B-WICH complex positively regulates rRNA expression,Deubiquitination,DNA Damage/Telomere Stress Induced Senescence,DNA methylation,DNA Replication Pre-Initiation,ERCC6 (CSB) and EHMT2 (G9a) positively regulate rRNA expression,…
hsa-miR-654-3p	miR-654-3p (and other miRNAs w/seed AUGUCUG)	-6,118	TargetScan Mouse,TargetScan Human	High (predicted),Moderate (predicted)	H2AZ1	H2AZ1	-4,269	Amyloid fiber formation,Ferroptosis Signaling Pathway,IL-33 Signaling Pathway,Kinetochore Metaphase Signaling Pathway
hsa-miR-155-5p	miR-155-5p (miRNAs w/seed UAAUGCU)	2,493	TargetScan Mouse,TargetScan Human	High (predicted)	H3-3B	H3-3A/H3-3B	-5,151	Androgen Signaling,Circadian Rhythm Signaling,ERK/MAPK Signaling,Glucocorticoid Receptor Signaling,HOTAIR Regulatory Pathway,IL-12 Signaling and Production in Macrophages,Macrophage Alternative Activation Signaling Pathway,p38 MAPK Signaling,Protein Kinase A Signaling,Ribonucleotide Reductase Signaling Pathway,Serotonin Receptor Signaling,Sirtuin Signaling Pathway,TR/RXR Activation,UFMylation Sig…
hsa-miR-377-3p	miR-377-3p (miRNAs w/seed UCACACA)	-24,471	TargetScan Mouse,TargetScan Human	High (predicted)	H3-3B	H3-3A/H3-3B	-5,151	Androgen Signaling,Circadian Rhythm Signaling,ERK/MAPK Signaling,Glucocorticoid Receptor Signaling,HOTAIR Regulatory Pathway,IL-12 Signaling and Production in Macrophages,Macrophage Alternative Activation Signaling Pathway,p38 MAPK Signaling,Protein Kinase A Signaling,Ribonucleotide Reductase Signaling Pathway,Serotonin Receptor Signaling,Sirtuin Signaling Pathway,TR/RXR Activation,UFMylation Sig…
hsa-miR-193b-3p	miR-193a-3p (and other miRNAs w/seed ACUGGCC)	-12,236	TargetScan Human	High (predicted)	HACE1	HACE1	-6,617	Class I MHC mediated antigen processing and presentation
hsa-miR-455-3p	miR-455-3p (miRNAs w/seed CAGUCCA)	-3,496	TargetScan Mouse,Ingenuity Expert Findings,TargetScan Human	Experimentally Observed,Moderate (predicted)	HDAC2	HDAC2	-2,396	Adipogenesis pathway,Bladder Cancer Signaling,Calcium Signaling,Calcium-induced T Lymphocyte Apoptosis,Cardiac Hypertrophy Signaling (Enhanced),Cell Cycle: G1/S Checkpoint Regulation,Chaperone Mediated Autophagy Signaling Pathway,Chronic Myeloid Leukemia Signaling,Coronavirus Pathogenesis Pathway,Cyclins and Cell Cycle Regulation,DNA Methylation and Transcriptional Repression Signaling,EGR2 and S…
hsa-miR-3152-5p	miR-3152-5p (miRNAs w/seed UUGCCUC)	-24,471	TargetScan Human	High (predicted)	HEBP2	HEBP2	142,805	Neutrophil degranulation
hsa-miR-193b-3p	miR-193a-3p (and other miRNAs w/seed ACUGGCC)	-12,236	TargetScan Human	High (predicted)	HECTD3	HECTD3	2,244	Class I MHC mediated antigen processing and presentation
hsa-miR-376c-3p	miR-376c-3p (and other miRNAs w/seed ACAUAGA)	-4,079	TargetScan Human	High (predicted)	HERPUD1	HERPUD1	5,072	ATF4 activates genes in response to endoplasmic reticulum stress,NRF2-mediated Oxidative Stress Response
hsa-miR-487b-3p	miR-487b-3p (miRNAs w/seed AUCGUAC)	-2,719	TargetScan Human	High (predicted)	HERPUD1	HERPUD1	5,072	ATF4 activates genes in response to endoplasmic reticulum stress,NRF2-mediated Oxidative Stress Response
hsa-miR-369-3p	miR-369-3p (miRNAs w/seed AUAAUAC)	-24,471	TargetScan Mouse,TargetScan Human	High (predicted),Moderate (predicted)	HES1	HES1	-2,401	Chronic Myeloid Leukemia Signaling,Estrogen Receptor Signaling,Molecular Mechanisms of Cancer,Notch Signaling,Osteoarthritis Pathway,Pulmonary Fibrosis Idiopathic Signaling Pathway,Regulation of beta-cell development,ROBO SLIT Signaling Pathway,Signaling by NOTCH1,Signaling by NOTCH2,Signaling by NOTCH3,Signaling by NOTCH4,Transcriptional regulation by RUNX2,Transcriptional regulation by RUNX3,VD…
hsa-miR-935	miR-935 (miRNAs w/seed CAGUUAC)	4,781	TargetScan Human	High (predicted)	HEY2	HEY2	35,540	Notch Signaling,Signaling by NOTCH1,Signaling by NOTCH3,Signaling by NOTCH4,Transcriptional regulation by RUNX2
hsa-miR-376c-3p	miR-376c-3p (and other miRNAs w/seed ACAUAGA)	-4,079	TargetScan Mouse,TargetScan Human	High (predicted),Moderate (predicted)	HIF1A	HIF1A	-2,668	Adipogenesis pathway,Adrenomedullin signaling pathway,Apelin Adipocyte Signaling Pathway,Apelin Cardiomyocyte Signaling Pathway,Apelin Endothelial Signaling Pathway,Autophagy,BEX2 Signaling Pathway,Breast Cancer Regulation by Stathmin1,Cellular response to hypoxia,Chaperone Mediated Autophagy Signaling Pathway,Circadian Clock,Circadian Rhythm Signaling,CLEAR Signaling Pathway,Coronavirus Pathogen…
hsa-miR-660-5p	miR-660-5p (and other miRNAs w/seed ACCCAUU)	-24,471	TargetScan Human	High (predicted)	HIF1A	HIF1A	-2,668	Adipogenesis pathway,Adrenomedullin signaling pathway,Apelin Adipocyte Signaling Pathway,Apelin Cardiomyocyte Signaling Pathway,Apelin Endothelial Signaling Pathway,Autophagy,BEX2 Signaling Pathway,Breast Cancer Regulation by Stathmin1,Cellular response to hypoxia,Chaperone Mediated Autophagy Signaling Pathway,Circadian Clock,Circadian Rhythm Signaling,CLEAR Signaling Pathway,Coronavirus Pathogen…
hsa-miR-424-3p	miR-424-3p (miRNAs w/seed AAAACGU)	-12,236	TargetScan Human	High (predicted)	HIGD1A	HIGD1A	16,869	Cellular response to hypoxia
hsa-miR-495-3p	miR-495-3p (and other miRNAs w/seed AACAAAC)	-12,236	TargetScan Human	High (predicted)	HIGD1A	HIGD1A	16,869	Cellular response to hypoxia
hsa-miR-431-5p	miR-431-5p (and other miRNAs w/seed GUCUUGC)	-6,118	TargetScan Human	High (predicted)	HIKESHI	HIKESHI	2,133	Cellular response to heat stress
hsa-miR-379-5p	miR-379-5p (and other miRNAs w/seed GGUAGAC)	-2,225	TargetScan Human	High (predicted)	HLA-E	HLA-E	76,037	Allograft Rejection Signaling,Antigen Presentation Pathway,Autism Signaling Pathway,Autoimmune Thyroid Disease Signaling,Caveolar-mediated Endocytosis Signaling,CDC42 Signaling,Class I MHC mediated antigen processing and presentation,Communication between Innate and Adaptive Immune Cells,Crosstalk between Dendritic Cells and Natural Killer Cells,CTLA4 Signaling in Cytotoxic T Lymphocytes,Cytotoxi…
hsa-miR-654-5p	miR-541-3p (and other miRNAs w/seed GGUGGGC)	-12,236	TargetScan Human	High (predicted)	HMGA1	HMGA1	5,136	DNA Damage/Telomere Stress Induced Senescence,iNOS Signaling
hsa-miR-625-5p	miR-625-5p (and other miRNAs w/seed GGGGGAA)	-8,157	TargetScan Mouse,TargetScan Human	High (predicted),Moderate (predicted)	HMGA1	HMGA1	5,136	DNA Damage/Telomere Stress Induced Senescence,iNOS Signaling
hsa-miR-505-3p	miR-505-3p (miRNAs w/seed GUCAACA)	-12,236	TargetScan Human	High (predicted)	HMGB1	HMGB1	-3,852	Advanced glycosylation endproduct receptor signaling,Apoptotic execution phase,BER (Base Excision Repair) Pathway,Cachexia Signaling Pathway,Chaperone Mediated Autophagy Signaling Pathway,Class I MHC mediated antigen processing and presentation,DDX58/IFIH1-mediated induction of interferon-alpha/beta,FXR/RXR Activation,Glucocorticoid Receptor Signaling,HMGB1 Signaling,Immunogenic Cell Death Signal…
hsa-let-7a-2-3p	let-7a-2-3p (and other miRNAs w/seed UGUACAG)	2,248	TargetScan Mouse,TargetScan Human	High (predicted),Moderate (predicted)	HMGN1	HMGN1	2,713	NER (Nucleotide Excision Repair, Enhanced Pathway),Nucleotide Excision Repair,p38 MAPK Signaling
hsa-miR-377-3p	miR-377-3p (miRNAs w/seed UCACACA)	-24,471	TargetScan Mouse,TargetScan Human	High (predicted)	HMOX1	HMOX1	17,851	Acetylcholine Receptor Signaling Pathway,Acute Phase Response Signaling,Antioxidant Action of Vitamin C,Choline Biosynthesis III,CTLA4 Signaling in Cytotoxic T Lymphocytes,Cytoprotection by HMOX1,DHCR24 Signaling Pathway,Docosahexaenoic Acid (DHA) Signaling,Endothelin-1 Signaling,Fcγ Receptor-mediated Phagocytosis in Macrophages and Monocytes,Ferroptosis Signaling Pathway,FXR/RXR Activation,Gluta…
hsa-miR-485-5p	miR-485-5p (and other miRNAs w/seed GAGGCUG)	-4,079	TargetScan Human	High (predicted)	HMOX1	HMOX1	17,851	Acetylcholine Receptor Signaling Pathway,Acute Phase Response Signaling,Antioxidant Action of Vitamin C,Choline Biosynthesis III,CTLA4 Signaling in Cytotoxic T Lymphocytes,Cytoprotection by HMOX1,DHCR24 Signaling Pathway,Docosahexaenoic Acid (DHA) Signaling,Endothelin-1 Signaling,Fcγ Receptor-mediated Phagocytosis in Macrophages and Monocytes,Ferroptosis Signaling Pathway,FXR/RXR Activation,Gluta…
hsa-miR-155-5p	miR-155-5p (miRNAs w/seed UAAUGCU)	2,493	TargetScan Human	High (predicted)	HNRNPA3	HNRNPA3	-11,010	Processing of Capped Intron-Containing Pre-mRNA
hsa-miR-214-3p	miR-214-3p (and other miRNAs w/seed CAGCAGG)	-4,894	TargetScan Human	High (predicted)	HNRNPA3	HNRNPA3	-11,010	Processing of Capped Intron-Containing Pre-mRNA
hsa-miR-197-3p	miR-197-3p (and other miRNAs w/seed UCACCAC)	-2,039	TargetScan Mouse,TargetScan Human	High (predicted)	HNRNPD	HNRNPD	-4,676	CSDE1 Signaling Pathway,Estrogen Receptor Signaling,MicroRNA Biogenesis Signaling Pathway,Processing of Capped Intron-Containing Pre-mRNA,Regulation of mRNA stability by proteins that bind AU-rich elements
hsa-miR-137-3p	miR-137-3p (miRNAs w/seed UAUUGCU)	-8,157	TargetScan Human	High (predicted)	HNRNPDL	HNRNPDL	-2,881	Gene and protein expression by JAK-STAT signaling after IL-12 stimulation
hsa-miR-411-5p	miR-411-5p (and other miRNAs w/seed AGUAGAC)	6,865	TargetScan Human	High (predicted)	HNRNPH1	HNRNPH1	-8,462	Processing of Capped Intron-Containing Pre-mRNA,Signaling by FGFR2
hsa-miR-485-3p	miR-485-3p (and other miRNAs w/seed UCAUACA)	-12,236	TargetScan Human	High (predicted)	HNRNPH2	HNRNPH2	-3,285	Processing of Capped Intron-Containing Pre-mRNA
hsa-miR-505-3p	miR-505-3p (miRNAs w/seed GUCAACA)	-12,236	TargetScan Mouse,TargetScan Human	High (predicted)	HNRNPM	HNRNPM	-5,559	Processing of Capped Intron-Containing Pre-mRNA,Signaling by FGFR2
hsa-miR-329-3p	miR-329-3p (and other miRNAs w/seed ACACACC)	-12,236	TargetScan Human	High (predicted)	HSPA4	HSPA4	-5,837	Aldosterone Signaling in Epithelial Cells,Androgen Signaling,BAG2 Signaling Pathway,Cachexia Signaling Pathway,Cellular response to heat stress,Chaperone Mediated Autophagy Signaling Pathway,eNOS Signaling,Glucocorticoid Receptor Signaling,HIF1α Signaling,Huntington's Disease Signaling,Immunogenic Cell Death Signaling Pathway,Natural Killer Cell Signaling,NOD1/2 Signaling Pathway,Protein Ubiquiti…
hsa-miR-214-3p	miR-214-3p (and other miRNAs w/seed CAGCAGG)	-4,894	TargetScan Mouse,TargetScan Human	High (predicted),Moderate (predicted)	HSPB1	HSPB1	2614,309	Aldosterone Signaling in Epithelial Cells,Aryl Hydrocarbon Receptor Signaling,Cardiac Hypertrophy Signaling,Cardiac Hypertrophy Signaling (Enhanced),Cellular response to heat stress,Death Receptor Signaling,Eicosanoid Signaling,ERK/MAPK Signaling,Extra-nuclear estrogen signaling,Ferroptosis Signaling Pathway,IL-6 Signaling,MAPK6/MAPK4 signaling,Oxytocin Signaling Pathway,p38 MAPK Signaling,Protei…
hsa-miR-654-5p	miR-541-3p (and other miRNAs w/seed GGUGGGC)	-12,236	TargetScan Human	High (predicted)	HSPG2	HSPG2	12,179	Amyloid fiber formation,Degradation of the extracellular matrix,Extracellular matrix organization,Glycosaminoglycan metabolism,Inhibition of Angiogenesis by TSP1,Inhibition of Matrix Metalloproteases,Integrin cell surface interactions,Retinoid metabolism and transport
hsa-miR-181a-2-3p	miR-181a-2-3p (and other miRNAs w/seed CCACUGA)	-24,471	TargetScan Human	High (predicted)	HTRA1	HTRA1	1474,702	Degradation of the extracellular matrix,Neuroprotective Role of THOP1 in Alzheimer's Disease,Osteoarthritis Pathway
hsa-miR-193b-3p	miR-193a-3p (and other miRNAs w/seed ACUGGCC)	-12,236	TargetScan Mouse,TargetScan Human	High (predicted),Moderate (predicted)	HYOU1	HYOU1	3,903	Binding and Uptake of Ligands by Scavenger Receptors,XBP1(S) activates chaperone genes
hsa-miR-1180-3p	miR-1180-3p (miRNAs w/seed UUCCGGC)	-2,225	TargetScan Human	High (predicted)	ID3	ID3	13,348	Human Embryonic Stem Cell Pluripotency,Mouse Embryonic Stem Cell Pluripotency,NGF-stimulated transcription
hsa-miR-149-5p	miR-149-5p (miRNAs w/seed CUGGCUC)	16,673	TargetScan Human	High (predicted)	ID3	ID3	13,348	Human Embryonic Stem Cell Pluripotency,Mouse Embryonic Stem Cell Pluripotency,NGF-stimulated transcription
hsa-miR-485-5p	miR-485-5p (and other miRNAs w/seed GAGGCUG)	-4,079	TargetScan Human	High (predicted)	IFI6	IFI6	129,463	Interferon alpha/beta signaling,Interferon Signaling
hsa-miR-370-3p	miR-370-3p (and other miRNAs w/seed CCUGCUG)	-6,118	TargetScan Human	High (predicted)	IFNAR1	IFNAR1	246,754	Activation of IRF by Cytosolic Pattern Recognition Receptors,Cardiac Hypertrophy Signaling (Enhanced),Coronavirus Pathogenesis Pathway,Dendritic Cell Maturation,FAK Signaling,Glucocorticoid Receptor Signaling,Hepatic Fibrosis / Hepatic Stellate Cell Activation,IL-27 Signaling Pathway,Immunogenic Cell Death Signaling Pathway,Interferon alpha/beta signaling,Interferon Signaling,ISGylation Signaling…
hsa-miR-496	miR-503-3p (and other miRNAs w/seed GAGUAUU)	-8,157	TargetScan Human	High (predicted)	IFT52	IFT52	-3,158	BBSome Signaling Pathway,Cilium Assembly,Hedgehog 'off' state
hsa-miR-625-5p	miR-625-5p (and other miRNAs w/seed GGGGGAA)	-8,157	TargetScan Mouse,TargetScan Human	High (predicted),Moderate (predicted)	IGF2	IGF2	-213,699	Autism Signaling Pathway,Estrogen Receptor Signaling,Glioblastoma Multiforme Signaling,Glioma Signaling,Growth Hormone Signaling,Hepatic Fibrosis / Hepatic Stellate Cell Activation,HIF1α Signaling,ID1 Signaling Pathway,Regulation of Insulin-like Growth Factor (IGF) transport and uptake by IGFBPs,Response to elevated platelet cytosolic Ca2+,Signaling by Type 1 Insulin-like Growth Factor 1 Receptor…
hsa-miR-625-5p	miR-625-5p (and other miRNAs w/seed GGGGGAA)	-8,157	Ingenuity Expert Findings,TargetScan Human	Experimentally Observed,High (predicted)	IGF2BP1	IGF2BP1	47,052	MAPK6/MAPK4 signaling,Role of OCT4 in Mammalian Embryonic Stem Cell Pluripotency
hsa-miR-197-3p	miR-197-3p (and other miRNAs w/seed UCACCAC)	-2,039	TargetScan Mouse,TargetScan Human	High (predicted),Moderate (predicted)	IGFBP3	IGFBP3	-1198,369	Cachexia Signaling Pathway,Growth Hormone Signaling,Hepatic Fibrosis / Hepatic Stellate Cell Activation,IGF-1 Signaling,Post-translational protein phosphorylation,RAR Activation,Regulation of Insulin-like Growth Factor (IGF) transport and uptake by IGFBPs,TP53 Regulates Transcription of Cell Death Genes,VDR/RXR Activation
hsa-miR-155-5p	miR-155-5p (miRNAs w/seed UAAUGCU)	2,493	TargetScan Human	High (predicted)	IKBIP	IKBIP	4,216	TAK1-dependent IKK and NF-kappa-B activation
hsa-miR-376c-5p	miR-376b-5p (and other miRNAs w/seed GUGGAUA)	-24,471	TargetScan Human	High (predicted)	IKBIP	IKBIP	4,216	TAK1-dependent IKK and NF-kappa-B activation
hsa-miR-454-3p	miR-130a-3p (and other miRNAs w/seed AGUGCAA)	-24,471	TargetScan Human	High (predicted)	IL10RB	IL10RB	40,418	Cardiac Hypertrophy Signaling (Enhanced),FAK Signaling,Glucocorticoid Receptor Signaling,IL-10 Signaling,IL-12 Signaling and Production in Macrophages,IL-22 Signaling,Interleukin-10 signaling,Interleukin-20 family signaling,ISGylation Signaling Pathway,Macrophage Alternative Activation Signaling Pathway,Molecular Mechanisms of Cancer,Other interleukin signaling,PI3K/AKT Signaling,S100 Family Sign…
hsa-miR-455-3p	miR-455-3p (miRNAs w/seed CAGUCCA)	-3,496	TargetScan Human	High (predicted)	IL10RB	IL10RB	40,418	Cardiac Hypertrophy Signaling (Enhanced),FAK Signaling,Glucocorticoid Receptor Signaling,IL-10 Signaling,IL-12 Signaling and Production in Macrophages,IL-22 Signaling,Interleukin-10 signaling,Interleukin-20 family signaling,ISGylation Signaling Pathway,Macrophage Alternative Activation Signaling Pathway,Molecular Mechanisms of Cancer,Other interleukin signaling,PI3K/AKT Signaling,S100 Family Sign…
hsa-miR-2682-3p	miR-2682-3p (and other miRNAs w/seed GCCUCUU)	-24,471	TargetScan Human	High (predicted)	IL17D	IL17D	78,038	Adrenergic Receptor Signaling Pathway (Enhanced),Airway Pathology in Chronic Obstructive Pulmonary Disease,Autism Signaling Pathway,Cachexia Signaling Pathway,Cardiac Hypertrophy Signaling (Enhanced),CDX Gastrointestinal Cancer Signaling Pathway,CGAS-STING Signaling Pathway,Erythropoietin Signaling Pathway,FXR/RXR Activation,Hepatic Cholestasis,HMGB1 Signaling,IL-17 Signaling,Macrophage Classical…
hsa-miR-377-3p	miR-377-3p (miRNAs w/seed UCACACA)	-24,471	TargetScan Mouse,TargetScan Human	High (predicted),Moderate (predicted)	IL17RA	IL17RA	7,495	Cardiac Hypertrophy Signaling (Enhanced),Chaperone Mediated Autophagy Signaling Pathway,Coronavirus Pathogenesis Pathway,FAK Signaling,Glucocorticoid Receptor Signaling,Hepatic Fibrosis Signaling Pathway,IL-13 Signaling Pathway,IL-17 Signaling,IL-17A Signaling in Airway Cells,IL-17A Signaling in Fibroblasts,IL-17A Signaling in Gastric Cells,Interleukin-17 signaling,Molecular Mechanisms of Cancer,…
hsa-miR-376c-5p	miR-376b-5p (and other miRNAs w/seed GUGGAUA)	-24,471	TargetScan Human	High (predicted)	IL1RAP	IL1RAP	-28,980	Activin Inhibin Signaling Pathway,Acute Phase Response Signaling,Cachexia Signaling Pathway,Granulocyte Adhesion and Diapedesis,Hepatic Cholestasis,Hepatic Fibrosis / Hepatic Stellate Cell Activation,Hepatic Fibrosis Signaling Pathway,IL-1 Signaling,IL-10 Signaling,IL-27 Signaling Pathway,IL-33 Signaling Pathway,IL-6 Signaling,Interleukin-1 family signaling,LPS/IL-1 Mediated Inhibition of RXR Fun…
hsa-miR-376c-3p	miR-376c-3p (and other miRNAs w/seed ACAUAGA)	-4,079	TargetScan Human	High (predicted)	IL1RAP	IL1RAP	-28,980	Activin Inhibin Signaling Pathway,Acute Phase Response Signaling,Cachexia Signaling Pathway,Granulocyte Adhesion and Diapedesis,Hepatic Cholestasis,Hepatic Fibrosis / Hepatic Stellate Cell Activation,Hepatic Fibrosis Signaling Pathway,IL-1 Signaling,IL-10 Signaling,IL-27 Signaling Pathway,IL-33 Signaling Pathway,IL-6 Signaling,Interleukin-1 family signaling,LPS/IL-1 Mediated Inhibition of RXR Fun…
hsa-miR-204-5p	miR-204-5p (and other miRNAs w/seed UCCCUUU)	85,448	TargetScan Human	High (predicted)	IL1RL1	IL1RL1	931,130	Activin Inhibin Signaling Pathway,Cachexia Signaling Pathway,Cardiac Hypertrophy Signaling (Enhanced),FAK Signaling,Glucocorticoid Receptor Signaling,Granulocyte Adhesion and Diapedesis,Hepatic Cholestasis,Hepatic Fibrosis / Hepatic Stellate Cell Activation,Hepatic Fibrosis Signaling Pathway,IL-10 Signaling,IL-27 Signaling Pathway,IL-33 Signaling Pathway,IL-6 Signaling,Interleukin-1 family signal…
hsa-miR-654-5p	miR-541-3p (and other miRNAs w/seed GGUGGGC)	-12,236	TargetScan Human	High (predicted)	IL4R	IL4R	398,223	Cardiac Hypertrophy Signaling (Enhanced),FAK Signaling,Glucocorticoid Receptor Signaling,Hepatic Fibrosis / Hepatic Stellate Cell Activation,IL-10 Signaling,IL-13 Signaling Pathway,IL-4 Signaling,Interleukin-4 and Interleukin-13 signaling,Macrophage Alternative Activation Signaling Pathway,Molecular Mechanisms of Cancer,p70S6K Signaling,PI3K Signaling in B Lymphocytes,PI3K/AKT Signaling,Role of J…
hsa-miR-149-5p	miR-149-5p (miRNAs w/seed CUGGCUC)	16,673	TargetScan Human	High (predicted)	IRAK4	IRAK4	13,555	Hepatic Cholestasis,Hepatic Fibrosis Signaling Pathway,IL-1 Signaling,IL-33 Signaling Pathway,IL-8 Signaling,iNOS Signaling,Interleukin-1 family signaling,Macrophage Classical Activation Signaling Pathway,MyD88 cascade initiated on plasma membrane,MyD88 dependent cascade initiated on endosome,MyD88:MAL(TIRAP) cascade initiated on plasma membrane,Natural Killer Cell Signaling,Neuroinflammation Sig…
hsa-miR-485-5p	miR-485-5p (and other miRNAs w/seed GAGGCUG)	-4,079	TargetScan Human	High (predicted)	IRAK4	IRAK4	13,555	Hepatic Cholestasis,Hepatic Fibrosis Signaling Pathway,IL-1 Signaling,IL-33 Signaling Pathway,IL-8 Signaling,iNOS Signaling,Interleukin-1 family signaling,Macrophage Classical Activation Signaling Pathway,MyD88 cascade initiated on plasma membrane,MyD88 dependent cascade initiated on endosome,MyD88:MAL(TIRAP) cascade initiated on plasma membrane,Natural Killer Cell Signaling,Neuroinflammation Sig…
hsa-miR-935	miR-935 (miRNAs w/seed CAGUUAC)	4,781	TargetScan Human	High (predicted)	IREB2	IREB2	-4,305	Ferroptosis Signaling Pathway,Iron homeostasis signaling pathway,Iron uptake and transport
hsa-miR-454-3p	miR-130a-3p (and other miRNAs w/seed AGUGCAA)	-24,471	TargetScan Mouse,TargetScan Human	High (predicted)	IRF1	IRF1	6,151	CGAS-STING Signaling Pathway,Factors involved in megakaryocyte development and platelet production,HOTAIR Regulatory Pathway,IL-12 Signaling and Production in Macrophages,IL-15 Production,IL-27 Signaling Pathway,iNOS Signaling,Interferon alpha/beta signaling,Interferon gamma signaling,Interferon Signaling,ISGylation Signaling Pathway,Macrophage Classical Activation Signaling Pathway,Multiple Scle…
hsa-miR-1180-3p	miR-1180-3p (miRNAs w/seed UUCCGGC)	-2,225	TargetScan Human	High (predicted)	ISG15	ISG15	120,615	Activation of IRF by Cytosolic Pattern Recognition Receptors,DDX58/IFIH1-mediated induction of interferon-alpha/beta,DNA Damage Bypass,Interferon alpha/beta signaling,Interferon Signaling,ISG15 antiviral mechanism,ISGylation Signaling Pathway,Role of Hypercytokinemia/hyperchemokinemia in the Pathogenesis of Influenza,Systemic Lupus Erythematosus in B Cell Signaling Pathway
hsa-miR-1307-3p	miR-1307-3p (miRNAs w/seed CUCGGCG)	-6,118	TargetScan Human	High (predicted)	ISG20L2	ISG20L2	3,626	Major pathway of rRNA processing in the nucleolus and cytosol
hsa-let-7a-2-3p	let-7a-2-3p (and other miRNAs w/seed UGUACAG)	2,248	TargetScan Human	High (predicted)	ITGA1	ITGA1	10,628	Actin Cytoskeleton Signaling,Actin Nucleation by ARP-WASP Complex,Axonal Guidance Signaling,Cardiac Hypertrophy Signaling (Enhanced),Caveolar-mediated Endocytosis Signaling,CDC42 Signaling,Ephrin Receptor Signaling,ERK/MAPK Signaling,Extracellular matrix organization,FAK Signaling,Hepatic Fibrosis Signaling Pathway,HGF Signaling,Integrin cell surface interactions,Integrin Signaling,L1CAM interact…
hsa-miR-3130-5p	miR-3130-5p (and other miRNAs w/seed ACCCAGU)	-24,471	TargetScan Human	High (predicted)	ITGA10	ITGA10	8,915	Actin Cytoskeleton Signaling,Actin Nucleation by ARP-WASP Complex,Axonal Guidance Signaling,Cardiac Hypertrophy Signaling (Enhanced),Caveolar-mediated Endocytosis Signaling,CDC42 Signaling,Ephrin Receptor Signaling,ERK/MAPK Signaling,FAK Signaling,Hepatic Fibrosis Signaling Pathway,HGF Signaling,Integrin cell surface interactions,Integrin Signaling,L1CAM interactions,Molecular Mechanisms of Cance…
hsa-miR-199a-3p	miR-199a-3p (and other miRNAs w/seed CAGUAGU)	-1,224	TargetScan Mouse,TargetScan Human	High (predicted),Moderate (predicted)	ITGA3	ITGA3	-2,628	Actin Cytoskeleton Signaling,Actin Nucleation by ARP-WASP Complex,Axonal Guidance Signaling,Cardiac Hypertrophy Signaling (Enhanced),Caveolar-mediated Endocytosis Signaling,CDC42 Signaling,CDK5 Signaling,Cell surface interactions at the vascular wall,CTLA4 Signaling in Cytotoxic T Lymphocytes,Ephrin Receptor Signaling,ERK/MAPK Signaling,Extracellular matrix organization,FAK Signaling,Germ Cell-Se…
hsa-miR-92b-3p	miR-92a-3p (and other miRNAs w/seed AUUGCAC)	76,008	TargetScan Mouse,Ingenuity Expert Findings,TargetScan Human,miRecords	Experimentally Observed,High (predicted),Moderate (predicted)	ITGA5	ITGA5	5,762	Actin Cytoskeleton Signaling,Actin Nucleation by ARP-WASP Complex,Agranulocyte Adhesion and Diapedesis,Axonal Guidance Signaling,Cardiac Hypertrophy Signaling (Enhanced),Caveolar-mediated Endocytosis Signaling,CDC42 Signaling,Cell surface interactions at the vascular wall,Clathrin-mediated Endocytosis Signaling,Elastic fibre formation,Ephrin Receptor Signaling,ERK/MAPK Signaling,Extracellular mat…
hsa-miR-154-5p	miR-154-5p (miRNAs w/seed AGGUUAU)	-8,157	TargetScan Human	High (predicted)	JAM3	JAM3	15,516	Agranulocyte Adhesion and Diapedesis,Cell surface interactions at the vascular wall,Granulocyte Adhesion and Diapedesis,Integrin cell surface interactions,Leukocyte Extravasation Signaling,Sertoli Cell-Germ Cell Junction Signaling Pathway (Enhanced),Sertoli Cell-Sertoli Cell Junction Signaling,Tight Junction Signaling
hsa-miR-454-3p	miR-130a-3p (and other miRNAs w/seed AGUGCAA)	-24,471	TargetScan Mouse,TargetScan Human	High (predicted)	JARID2	JARID2	-7,635	HOTAIR Regulatory Pathway,Macrophage Classical Activation Signaling Pathway,Multiple Sclerosis Signaling Pathway,PRC2 methylates histones and DNA,Pulmonary Fibrosis Idiopathic Signaling Pathway,Role of OCT4 in Mammalian Embryonic Stem Cell Pluripotency
hsa-miR-155-5p	miR-155-5p (miRNAs w/seed UAAUGCU)	2,493	TargetScan Mouse,Ingenuity Expert Findings,TargetScan Human,miRecords	Experimentally Observed,High (predicted)	JARID2	JARID2	-7,635	HOTAIR Regulatory Pathway,Macrophage Classical Activation Signaling Pathway,Multiple Sclerosis Signaling Pathway,PRC2 methylates histones and DNA,Pulmonary Fibrosis Idiopathic Signaling Pathway,Role of OCT4 in Mammalian Embryonic Stem Cell Pluripotency
hsa-miR-485-3p	miR-485-3p (and other miRNAs w/seed UCAUACA)	-12,236	TargetScan Human	High (predicted)	KBTBD6	KBTBD6	10,403	Class I MHC mediated antigen processing and presentation,Neddylation
hsa-miR-193b-3p	miR-193a-3p (and other miRNAs w/seed ACUGGCC)	-12,236	TargetScan Human	High (predicted)	KCTD7	KCTD7	15,849	Class I MHC mediated antigen processing and presentation,Neddylation
hsa-miR-199a-3p	miR-199a-3p (and other miRNAs w/seed CAGUAGU)	-1,224	TargetScan Human	High (predicted)	KCTD7	KCTD7	15,849	Class I MHC mediated antigen processing and presentation,Neddylation
hsa-miR-137-3p	miR-137-3p (miRNAs w/seed UAUUGCU)	-8,157	TargetScan Human	High (predicted)	KDELR3	KDELR3	27,209	COPI-mediated anterograde transport,Intra-Golgi and retrograde Golgi-to-ER traffic,Protein Kinase A Signaling,Protein Sorting Signaling Pathway,XBP1(S) activates chaperone genes
hsa-miR-193a-5p	miR-193a-5p (miRNAs w/seed GGGUCUU)	-24,471	TargetScan Human	High (predicted)	KDELR3	KDELR3	27,209	COPI-mediated anterograde transport,Intra-Golgi and retrograde Golgi-to-ER traffic,Protein Kinase A Signaling,Protein Sorting Signaling Pathway,XBP1(S) activates chaperone genes
hsa-miR-376a-3p	miR-376a-3p (and other miRNAs w/seed UCAUAGA)	-4,894	TargetScan Mouse,TargetScan Human	High (predicted),Moderate (predicted)	KHDRBS3	KHDRBS3	58,760	Signaling by PTK6
hsa-miR-369-3p	miR-369-3p (miRNAs w/seed AUAAUAC)	-24,471	TargetScan Mouse,TargetScan Human	High (predicted),Moderate (predicted)	KIF20A	KIF20A	-72,367	Epithelial Adherens Junction Signaling,Intra-Golgi and retrograde Golgi-to-ER traffic,Kinesins,MHC class II antigen presentation,Mitotic Telophase/Cytokinesis
hsa-miR-374a-5p	miR-374b-5p (and other miRNAs w/seed UAUAAUA)	-12,236	TargetScan Mouse,TargetScan Human	High (predicted),Moderate (predicted)	KIF20A	KIF20A	-72,367	Epithelial Adherens Junction Signaling,Intra-Golgi and retrograde Golgi-to-ER traffic,Kinesins,MHC class II antigen presentation,Mitotic Telophase/Cytokinesis
hsa-miR-149-5p	miR-149-5p (miRNAs w/seed CUGGCUC)	16,673	TargetScan Human	High (predicted)	KIF2A	KIF2A	-2,489	Cell Cycle Checkpoints,Intra-Golgi and retrograde Golgi-to-ER traffic,Kinesins,MHC class II antigen presentation,Mitotic Metaphase and Anaphase,Mitotic Prometaphase,RHO GTPases Activate Formins
hsa-miR-376c-3p	miR-376c-3p (and other miRNAs w/seed ACAUAGA)	-4,079	TargetScan Human	High (predicted)	KIFC1	KIFC1	-197,204	Intra-Golgi and retrograde Golgi-to-ER traffic,Kinesins
hsa-miR-127-3p	miR-127-3p (miRNAs w/seed CGGAUCC)	50,550	TargetScan Human	High (predicted)	KIFC2	KIFC2	277,793	Intra-Golgi and retrograde Golgi-to-ER traffic,Kinesins
hsa-miR-92b-3p	miR-92a-3p (and other miRNAs w/seed AUUGCAC)	76,008	TargetScan Mouse,TargetScan Human	High (predicted)	KLF4	KLF4	-7,345	Chronic Myeloid Leukemia Signaling,Eicosanoid Signaling,Folate Signaling Pathway,FOXO-mediated transcription of cell cycle genes,Human Embryonic Stem Cell Pluripotency,Macrophage Alternative Activation Signaling Pathway,Synthesis, secretion, and deacylation of Ghrelin,Transcriptional regulation of pluripotent stem cells,Transcriptional regulation of white adipocyte differentiation,Transcriptional…
hsa-miR-329-3p	miR-329-3p (and other miRNAs w/seed ACACACC)	-12,236	TargetScan Mouse,TargetScan Human	High (predicted),Moderate (predicted)	KLHL2	KLHL2	-3,649	Class I MHC mediated antigen processing and presentation,Neddylation
hsa-miR-454-3p	miR-130a-3p (and other miRNAs w/seed AGUGCAA)	-24,471	TargetScan Mouse,TargetScan Human	High (predicted),Moderate (predicted)	KLHL20	KLHL20	-4,951	Class I MHC mediated antigen processing and presentation,Neddylation
hsa-miR-214-3p	miR-214-3p (and other miRNAs w/seed CAGCAGG)	-4,894	TargetScan Mouse,TargetScan Human	High (predicted),Moderate (predicted)	KMT2D	KMT2D	-2,286	Activation of anterior HOX genes in hindbrain during early embryogenesis,Formation of WDR5-containing histone-modifying complexes,RUNX1 regulates megakaryocyte differentiation and platelet function,TCF dependent signaling in response to WNT
hsa-miR-3152-5p	miR-3152-5p (miRNAs w/seed UUGCCUC)	-24,471	TargetScan Human	High (predicted)	KMT2D	KMT2D	-2,286	Activation of anterior HOX genes in hindbrain during early embryogenesis,Formation of WDR5-containing histone-modifying complexes,RUNX1 regulates megakaryocyte differentiation and platelet function,TCF dependent signaling in response to WNT
hsa-miR-625-5p	miR-625-5p (and other miRNAs w/seed GGGGGAA)	-8,157	TargetScan Mouse,TargetScan Human	High (predicted)	KMT2D	KMT2D	-2,286	Activation of anterior HOX genes in hindbrain during early embryogenesis,Formation of WDR5-containing histone-modifying complexes,RUNX1 regulates megakaryocyte differentiation and platelet function,TCF dependent signaling in response to WNT
hsa-miR-376a-3p	miR-376a-3p (and other miRNAs w/seed UCAUAGA)	-4,894	TargetScan Mouse,TargetScan Human	High (predicted),Moderate (predicted)	KPNA4	KPNA4	-3,578	ISG15 antiviral mechanism,RAN Signaling,Role of NFAT in Regulation of the Immune Response
hsa-miR-193b-3p	miR-193a-3p (and other miRNAs w/seed ACUGGCC)	-12,236	TargetScan Mouse,TargetScan Human	High (predicted)	KRAS	KRAS	-4,279	14-3-3-mediated Signaling,Actin Cytoskeleton Signaling,Actin Nucleation by ARP-WASP Complex,Activation of NMDA receptors and postsynaptic events,Acute Myeloid Leukemia Signaling,Acute Phase Response Signaling,Adrenomedullin signaling pathway,Agrin Interactions at Neuromuscular Junction,Aldosterone Signaling in Epithelial Cells,Angiopoietin Signaling,Antiproliferative Role of Somatostatin Receptor…
hsa-miR-377-3p	miR-377-3p (miRNAs w/seed UCACACA)	-24,471	TargetScan Mouse,TargetScan Human	High (predicted),Moderate (predicted)	KRAS	KRAS	-4,279	14-3-3-mediated Signaling,Actin Cytoskeleton Signaling,Actin Nucleation by ARP-WASP Complex,Activation of NMDA receptors and postsynaptic events,Acute Myeloid Leukemia Signaling,Acute Phase Response Signaling,Adrenomedullin signaling pathway,Agrin Interactions at Neuromuscular Junction,Aldosterone Signaling in Epithelial Cells,Angiopoietin Signaling,Antiproliferative Role of Somatostatin Receptor…
hsa-miR-377-3p	miR-377-3p (miRNAs w/seed UCACACA)	-24,471	TargetScan Mouse,TargetScan Human	High (predicted),Moderate (predicted)	LAMB2	LAMB2	2,849	Extracellular matrix organization,GP6 Signaling Pathway,Myelination Signaling Pathway,Post-translational protein phosphorylation,Regulation of Insulin-like Growth Factor (IGF) transport and uptake by IGFBPs,Sertoli Cell-Germ Cell Junction Signaling Pathway (Enhanced),Sertoli Cell-Sertoli Cell Junction Signaling,Signaling by MET
hsa-miR-193b-3p	miR-193a-3p (and other miRNAs w/seed ACUGGCC)	-12,236	TargetScan Mouse,TargetScan Human	High (predicted),Moderate (predicted)	LAMC2	LAMC2	81,754	Assembly of collagen fibrils and other multimeric structures,CDK5 Signaling,Cell junction organization,Degradation of the extracellular matrix,Extracellular matrix organization,GP6 Signaling Pathway,Myelination Signaling Pathway,Sertoli Cell-Germ Cell Junction Signaling Pathway (Enhanced),Sertoli Cell-Sertoli Cell Junction Signaling,Signaling by MET,Wound Healing Signaling Pathway
hsa-miR-377-3p	miR-377-3p (miRNAs w/seed UCACACA)	-24,471	TargetScan Human	High (predicted)	LEMD3	LEMD3	-2,513	Mitotic Metaphase and Anaphase,Mitotic Prophase,RHO GTPase cycle
hsa-miR-376c-5p	miR-376b-5p (and other miRNAs w/seed GUGGAUA)	-24,471	TargetScan Human	High (predicted)	LIFR	LIFR	95,149	Cachexia Signaling Pathway,CNTF Signaling,Human Embryonic Stem Cell Pluripotency,ID1 Signaling Pathway,Interleukin-6 family signaling,Mouse Embryonic Stem Cell Pluripotency,Role of JAK family kinases in IL-6-type Cytokine Signaling,Role of NANOG in Mammalian Embryonic Stem Cell Pluripotency,Transcriptional regulation by RUNX1,Transcriptional Regulatory Network in Embryonic Stem Cells
hsa-miR-654-5p	miR-541-3p (and other miRNAs w/seed GGUGGGC)	-12,236	TargetScan Human	High (predicted)	LOXL3	LOXL3	-12,139	Assembly of collagen fibrils and other multimeric structures,Elastic fibre formation
hsa-miR-193b-3p	miR-193a-3p (and other miRNAs w/seed ACUGGCC)	-12,236	TargetScan Mouse,TargetScan Human	High (predicted),Moderate (predicted)	LPCAT1	LPCAT1	3,299	CDP-diacylglycerol Biosynthesis I,Glycerophospholipid biosynthesis,NAFLD Signaling Pathway,Neutrophil degranulation,Phosphatidylglycerol Biosynthesis II (Non-plastidic),Triacylglycerol Biosynthesis
hsa-miR-134-5p	miR-3118 (and other miRNAs w/seed GUGACUG)	-24,471	TargetScan Mouse,TargetScan Human	High (predicted),Moderate (predicted)	LPCAT1	LPCAT1	3,299	CDP-diacylglycerol Biosynthesis I,Glycerophospholipid biosynthesis,NAFLD Signaling Pathway,Neutrophil degranulation,Phosphatidylglycerol Biosynthesis II (Non-plastidic),Triacylglycerol Biosynthesis
hsa-miR-323a-5p	miR-323-5p (and other miRNAs w/seed GGUGGUC)	-8,157	TargetScan Mouse,TargetScan Human	High (predicted),Moderate (predicted)	LPCAT1	LPCAT1	3,299	CDP-diacylglycerol Biosynthesis I,Glycerophospholipid biosynthesis,NAFLD Signaling Pathway,Neutrophil degranulation,Phosphatidylglycerol Biosynthesis II (Non-plastidic),Triacylglycerol Biosynthesis
hsa-miR-625-5p	miR-625-5p (and other miRNAs w/seed GGGGGAA)	-8,157	TargetScan Mouse,TargetScan Human	High (predicted),Moderate (predicted)	LPCAT3	LPCAT3	-5,642	CDP-diacylglycerol Biosynthesis I,Ferroptosis Signaling Pathway,Glycerophospholipid biosynthesis,Phosphatidylglycerol Biosynthesis II (Non-plastidic),Triacylglycerol Biosynthesis
hsa-miR-454-3p	miR-130a-3p (and other miRNAs w/seed AGUGCAA)	-24,471	TargetScan Human	High (predicted)	LRIG1	LRIG1	-6,512	Signaling by EGFR,Signaling by MET
hsa-miR-455-3p	miR-455-3p (miRNAs w/seed CAGUCCA)	-3,496	TargetScan Human	High (predicted)	LRP6	LRP6	-5,081	Autism Signaling Pathway,Colorectal Cancer Metastasis Signaling,Factors Promoting Cardiogenesis in Vertebrates,Gap Junction Signaling,Hepatic Fibrosis Signaling Pathway,Molecular Mechanisms of Cancer,Role of Macrophages, Fibroblasts and Endothelial Cells in Rheumatoid Arthritis,Role of Osteoblasts in Rheumatoid Arthritis Signaling Pathway,Role of Osteoblasts, Osteoclasts and Chondrocytes in Rheum…
hsa-miR-3615	miR-3615 (miRNAs w/seed CUCUCGG)	-12,236	TargetScan Human	High (predicted)	LRRFIP1	LRRFIP1	3,354	Cytosolic sensors of pathogen-associated DNA
hsa-miR-454-3p	miR-130a-3p (and other miRNAs w/seed AGUGCAA)	-24,471	TargetScan Human	High (predicted)	LRRK2	LRRK2	-29,305	Chaperone Mediated Autophagy Signaling Pathway,Mitochondrial Dysfunction,Signaling by PTK6
hsa-miR-2682-3p	miR-2682-3p (and other miRNAs w/seed GCCUCUU)	-24,471	TargetScan Human	High (predicted)	LSM4	LSM4	2,393	Deadenylation-dependent mRNA decay,Processing of Capped Intron-Containing Pre-mRNA,Systemic Lupus Erythematosus Signaling
hsa-miR-204-5p	miR-204-5p (and other miRNAs w/seed UCCCUUU)	85,448	TargetScan Mouse,TargetScan Human	High (predicted)	LSM5	LSM5	-2,120	Deadenylation-dependent mRNA decay,Processing of Capped Intron-Containing Pre-mRNA,Systemic Lupus Erythematosus Signaling
hsa-miR-654-3p	miR-654-3p (and other miRNAs w/seed AUGUCUG)	-6,118	TargetScan Mouse,TargetScan Human	High (predicted)	LYPLA1	LYPLA1	-2,760	Metabolism of nitric oxide: NOS3 activation and regulation,RAS processing
hsa-miR-377-3p	miR-377-3p (miRNAs w/seed UCACACA)	-24,471	TargetScan Human	High (predicted)	MADD	MADD	5,240	RAB GEFs exchange GTP for GDP on RABs,TNF signaling,TNFR1 Signaling
hsa-miR-454-3p	miR-130a-3p (and other miRNAs w/seed AGUGCAA)	-24,471	TarBase,TargetScan Human,miRecords	Experimentally Observed,Moderate (predicted)	MAFB	MAFB	4,651	Activation of anterior HOX genes in hindbrain during early embryogenesis,IL-10 Signaling
hsa-miR-3615	miR-3615 (miRNAs w/seed CUCUCGG)	-12,236	TargetScan Human	High (predicted)	MAFB	MAFB	4,651	Activation of anterior HOX genes in hindbrain during early embryogenesis,IL-10 Signaling
hsa-miR-329-3p	miR-329-3p (and other miRNAs w/seed ACACACC)	-12,236	TargetScan Mouse,TargetScan Human	High (predicted),Moderate (predicted)	MAFG	MAFG	3,445	Factors involved in megakaryocyte development and platelet production,FXR/RXR Activation,KEAP1-NFE2L2 pathway,NFE2L2 regulates pentose phosphate pathway genes,NRF2-mediated Oxidative Stress Response
hsa-miR-654-5p	miR-541-3p (and other miRNAs w/seed GGUGGGC)	-12,236	TargetScan Human	High (predicted)	MAFG	MAFG	3,445	Factors involved in megakaryocyte development and platelet production,FXR/RXR Activation,KEAP1-NFE2L2 pathway,NFE2L2 regulates pentose phosphate pathway genes,NRF2-mediated Oxidative Stress Response
hsa-miR-625-5p	miR-625-5p (and other miRNAs w/seed GGGGGAA)	-8,157	TargetScan Human	High (predicted)	MAFG	MAFG	3,445	Factors involved in megakaryocyte development and platelet production,FXR/RXR Activation,KEAP1-NFE2L2 pathway,NFE2L2 regulates pentose phosphate pathway genes,NRF2-mediated Oxidative Stress Response
hsa-miR-127-3p	miR-127-3p (miRNAs w/seed CGGAUCC)	50,550	TargetScan Human	High (predicted)	MAGI1	MAGI1	-3,856	Epithelial Adherens Junction Signaling,PTEN Signaling
hsa-miR-381-3p	miR-381-3p (and other miRNAs w/seed AUACAAG)	-12,236	TargetScan Human	High (predicted)	MAGT1	MAGT1	2,210	ISGylation Signaling Pathway,Miscellaneous transport and binding events,Neutrophil degranulation
hsa-miR-3615	miR-3615 (miRNAs w/seed CUCUCGG)	-12,236	TargetScan Human	High (predicted)	MAMLD1	MAMLD1	-159,617	Formation of paraxial mesoderm,Generic Transcription Pathway,Pre-NOTCH Expression and Processing,Regulation of beta-cell development,Signaling by NOTCH1,Signaling by NOTCH2,Signaling by NOTCH3,Signaling by NOTCH4,Transcriptional regulation by RUNX3
hsa-miR-3613-5p	miR-3613-5p (miRNAs w/seed GUUGUAC)	-24,471	TargetScan Human	High (predicted)	MAN1A1	MAN1A1	-4,267	Intra-Golgi and retrograde Golgi-to-ER traffic
hsa-miR-92b-3p	miR-92a-3p (and other miRNAs w/seed AUUGCAC)	76,008	TargetScan Mouse,TargetScan Human	High (predicted)	MAN2A1	MAN2A1	-2,215	Intra-Golgi and retrograde Golgi-to-ER traffic
hsa-miR-181a-2-3p	miR-181a-2-3p (and other miRNAs w/seed CCACUGA)	-24,471	TargetScan Mouse,TargetScan Human	High (predicted),Moderate (predicted)	MANBA	MANBA	9,180	Neutrophil degranulation
hsa-miR-410-3p	miR-344d-3p (and other miRNAs w/seed AUAUAAC)	-12,236	TargetScan Human	High (predicted)	MANBA	MANBA	9,180	Neutrophil degranulation
hsa-miR-3615	miR-3615 (miRNAs w/seed CUCUCGG)	-12,236	TargetScan Human	High (predicted)	MANBA	MANBA	9,180	Neutrophil degranulation
hsa-miR-127-3p	miR-127-3p (miRNAs w/seed CGGAUCC)	50,550	TargetScan Human	High (predicted)	MAP2K4	MAP2K4	-5,162	14-3-3-mediated Signaling,4-1BB Signaling in T Lymphocytes,ABRA Signaling Pathway,Activation of IRF by Cytosolic Pattern Recognition Receptors,Activin Inhibin Signaling Pathway,Acute Myeloid Leukemia Signaling,Acute Phase Response Signaling,Adrenomedullin signaling pathway,Agrin Interactions at Neuromuscular Junction,Antioxidant Action of Vitamin C,Apelin Endothelial Signaling Pathway,Apelin Live…
hsa-miR-487b-3p	miR-487b-3p (miRNAs w/seed AUCGUAC)	-2,719	TargetScan Mouse,Ingenuity Expert Findings,TargetScan Human	Experimentally Observed,Moderate (predicted)	MAP2K4	MAP2K4	-5,162	14-3-3-mediated Signaling,4-1BB Signaling in T Lymphocytes,ABRA Signaling Pathway,Activation of IRF by Cytosolic Pattern Recognition Receptors,Activin Inhibin Signaling Pathway,Acute Myeloid Leukemia Signaling,Acute Phase Response Signaling,Adrenomedullin signaling pathway,Agrin Interactions at Neuromuscular Junction,Antioxidant Action of Vitamin C,Apelin Endothelial Signaling Pathway,Apelin Live…
hsa-miR-92b-3p	miR-92a-3p (and other miRNAs w/seed AUUGCAC)	76,008	TargetScan Mouse,TargetScan Human,miRecords	Experimentally Observed,High (predicted)	MAP2K4	MAP2K4	-5,162	14-3-3-mediated Signaling,4-1BB Signaling in T Lymphocytes,ABRA Signaling Pathway,Activation of IRF by Cytosolic Pattern Recognition Receptors,Activin Inhibin Signaling Pathway,Acute Myeloid Leukemia Signaling,Acute Phase Response Signaling,Adrenomedullin signaling pathway,Agrin Interactions at Neuromuscular Junction,Antioxidant Action of Vitamin C,Apelin Endothelial Signaling Pathway,Apelin Live…
hsa-miR-454-3p	miR-130a-3p (and other miRNAs w/seed AGUGCAA)	-24,471	TargetScan Mouse,TargetScan Human	High (predicted),Moderate (predicted)	MAPK1	MAPK1	-2,443	14-3-3-mediated Signaling,4-1BB Signaling in T Lymphocytes,Acetylcholine Receptor Signaling Pathway,Actin Cytoskeleton Signaling,Activation of NMDA receptors and postsynaptic events,Activin Inhibin Signaling Pathway,Acute Myeloid Leukemia Signaling,Acute Phase Response Signaling,Adrenomedullin signaling pathway,Advanced glycosylation endproduct receptor signaling,Agrin Interactions at Neuromuscul…
hsa-miR-204-5p	miR-204-5p (and other miRNAs w/seed UCCCUUU)	85,448	TargetScan Human	High (predicted)	MAPRE2	MAPRE2	3,751	Remodeling of Epithelial Adherens Junctions
hsa-miR-3615	miR-3615 (miRNAs w/seed CUCUCGG)	-12,236	TargetScan Human	High (predicted)	MAPRE2	MAPRE2	3,751	Remodeling of Epithelial Adherens Junctions
hsa-miR-1180-3p	miR-1180-3p (miRNAs w/seed UUCCGGC)	-2,225	TargetScan Human	High (predicted)	MAPRE3	MAPRE3	-2,499	Remodeling of Epithelial Adherens Junctions
hsa-miR-625-5p	miR-625-5p (and other miRNAs w/seed GGGGGAA)	-8,157	TargetScan Mouse,TargetScan Human	High (predicted),Moderate (predicted)	MARK2	MARK2	-2,678	Tight Junction Signaling,WNT/β-catenin Signaling
hsa-miR-485-5p	miR-485-5p (and other miRNAs w/seed GAGGCUG)	-4,079	TargetScan Human	High (predicted)	MAVS	MAVS	275,202	Activation of IRF by Cytosolic Pattern Recognition Receptors,Coronavirus Pathogenesis Pathway,DDX58/IFIH1-mediated induction of interferon-alpha/beta,Deubiquitination,NOD1/2 Signaling Pathway,Role of Pattern Recognition Receptors in Recognition of Bacteria and Viruses,Role of PKR in Interferon Induction and Antiviral Response,Role of RIG1-like Receptors in Antiviral Innate Immunity,Systemic Lupus…
hsa-miR-625-5p	miR-625-5p (and other miRNAs w/seed GGGGGAA)	-8,157	TargetScan Mouse,TargetScan Human	High (predicted)	MBD2	MBD2	-3,176	DNA Methylation and Transcriptional Repression Signaling,NoRC negatively regulates rRNA expression
hsa-miR-181a-2-3p	miR-181a-2-3p (and other miRNAs w/seed CCACUGA)	-24,471	TargetScan Human	High (predicted)	MBP	MBP	73,198	EGR2 and SOX10-mediated initiation of Schwann cell myelination,Granzyme A Signaling,Multiple Sclerosis Signaling Pathway,Myelination Signaling Pathway,TR/RXR Activation
hsa-miR-137-3p	miR-137-3p (miRNAs w/seed UAUUGCU)	-8,157	TargetScan Mouse,TargetScan Human	High (predicted)	MBTPS2	MBTPS2	-2,346	Endoplasmic Reticulum Stress Pathway,Plasma lipoprotein assembly, remodeling, and clearance,Regulation of cholesterol biosynthesis by SREBP (SREBF),Unfolded protein response,Unfolded Protein Response (UPR)
hsa-miR-329-3p	miR-329-3p (and other miRNAs w/seed ACACACC)	-12,236	TargetScan Mouse,TargetScan Human	High (predicted),Moderate (predicted)	MCAM	MCAM	5,088	ID1 Signaling Pathway,RHO GTPase cycle,S100 Family Signaling Pathway
hsa-miR-193b-3p	miR-193a-3p (and other miRNAs w/seed ACUGGCC)	-12,236	Ingenuity Expert Findings,TargetScan Human,miRecords	Experimentally Observed,High (predicted)	MCL1	MCL1	2,125	Apoptosis Signaling,Chaperone Mediated Autophagy Signaling Pathway,Chronic Myeloid Leukemia Signaling,IL-27 Signaling Pathway,IL-6 Signaling,IL-7 Signaling Pathway,Interleukin-4 and Interleukin-13 signaling,MYC Mediated Apoptosis Signaling,Neutrophil Extracellular Trap Signaling Pathway,PI3K/AKT Signaling,Role of JAK family kinases in IL-6-type Cytokine Signaling,Systemic Lupus Erythematosus in B…
hsa-miR-3615	miR-3615 (miRNAs w/seed CUCUCGG)	-12,236	TargetScan Human	High (predicted)	MCM3	MCM3	-14,110	Activation of the pre-replicative complex,Cell Cycle Checkpoints,Cell Cycle Control of Chromosomal Replication,DNA Replication Pre-Initiation,Synthesis of DNA
hsa-miR-204-5p	miR-204-5p (and other miRNAs w/seed UCCCUUU)	85,448	TargetScan Mouse,TargetScan Human	High (predicted)	MCOLN1	MCOLN1	2,046	CLEAR Signaling Pathway,Ion channel transport,Iron homeostasis signaling pathway,Iron uptake and transport
hsa-miR-625-5p	miR-625-5p (and other miRNAs w/seed GGGGGAA)	-8,157	TargetScan Human	High (predicted)	MDK	MDK	3341,147	Estrogen Receptor Signaling,Signaling by ALK,Signaling by NOTCH2
hsa-miR-454-3p	miR-130a-3p (and other miRNAs w/seed AGUGCAA)	-24,471	TargetScan Human	High (predicted)	MDM4	MDM4	-2,372	ATM Signaling,Cell Cycle Checkpoints,Cell Cycle: G2/M DNA Damage Checkpoint Regulation,Deubiquitination,Oncogene Induced Senescence,Oxidative Stress Induced Senescence,p53 Signaling,Regulation of TP53 Activity through Methylation,Regulation of TP53 Activity through Phosphorylation,Regulation of TP53 Expression and Degradation
hsa-miR-2116-3p	miR-2116-3p (miRNAs w/seed CUCCCAU)	-24,471	TargetScan Human	High (predicted)	MDM4	MDM4	-2,372	ATM Signaling,Cell Cycle Checkpoints,Cell Cycle: G2/M DNA Damage Checkpoint Regulation,Deubiquitination,Oncogene Induced Senescence,Oxidative Stress Induced Senescence,p53 Signaling,Regulation of TP53 Activity through Methylation,Regulation of TP53 Activity through Phosphorylation,Regulation of TP53 Expression and Degradation
hsa-miR-485-5p	miR-485-5p (and other miRNAs w/seed GAGGCUG)	-4,079	TargetScan Human	High (predicted)	MDM4	MDM4	-2,372	ATM Signaling,Cell Cycle Checkpoints,Cell Cycle: G2/M DNA Damage Checkpoint Regulation,Deubiquitination,Oncogene Induced Senescence,Oxidative Stress Induced Senescence,p53 Signaling,Regulation of TP53 Activity through Methylation,Regulation of TP53 Activity through Phosphorylation,Regulation of TP53 Expression and Degradation
hsa-miR-654-5p	miR-541-3p (and other miRNAs w/seed GGUGGGC)	-12,236	TargetScan Human	High (predicted)	MDM4	MDM4	-2,372	ATM Signaling,Cell Cycle Checkpoints,Cell Cycle: G2/M DNA Damage Checkpoint Regulation,Deubiquitination,Oncogene Induced Senescence,Oxidative Stress Induced Senescence,p53 Signaling,Regulation of TP53 Activity through Methylation,Regulation of TP53 Activity through Phosphorylation,Regulation of TP53 Expression and Degradation
hsa-miR-487a-5p	miR-487a-5p (and other miRNAs w/seed UGGUUAU)	-8,157	TargetScan Human	High (predicted)	ME1	ME1	-3,826	Gluconeogenesis I,NFE2L2 regulating TCA cycle genes,Regulation of lipid metabolism by PPARalpha,The citric acid (TCA) cycle and respiratory electron transport,TR/RXR Activation
hsa-miR-493-5p	miR-493-5p (miRNAs w/seed UGUACAU)	-24,471	TargetScan Mouse,Ingenuity Expert Findings,TargetScan Human	Experimentally Observed,Moderate (predicted)	MEF2C	MEF2C	-4,689	ABRA Signaling Pathway,Apelin Endothelial Signaling Pathway,B Cell Receptor Signaling,Cachexia Signaling Pathway,Calcium Signaling,Cardiac Hypertrophy Signaling,Cardiac Hypertrophy Signaling (Enhanced),Cardiomyocyte Differentiation via BMP Receptors,Cholecystokinin/Gastrin-mediated Signaling,Circadian Clock,Corticotropin Releasing Hormone Signaling,ERK5 Signaling,Factors Promoting Cardiogenesis i…
hsa-miR-501-5p	miR-501-5p (miRNAs w/seed AUCCUUU)	-24,471	TargetScan Mouse,TargetScan Human	High (predicted),Moderate (predicted)	MEF2C	MEF2C	-4,689	ABRA Signaling Pathway,Apelin Endothelial Signaling Pathway,B Cell Receptor Signaling,Cachexia Signaling Pathway,Calcium Signaling,Cardiac Hypertrophy Signaling,Cardiac Hypertrophy Signaling (Enhanced),Cardiomyocyte Differentiation via BMP Receptors,Cholecystokinin/Gastrin-mediated Signaling,Circadian Clock,Corticotropin Releasing Hormone Signaling,ERK5 Signaling,Factors Promoting Cardiogenesis i…
hsa-miR-3613-5p	miR-3613-5p (miRNAs w/seed GUUGUAC)	-24,471	TargetScan Human	High (predicted)	MEMO1	MEMO1	-4,958	Signaling by ERBB2
hsa-miR-485-3p	miR-485-3p (and other miRNAs w/seed UCAUACA)	-12,236	TargetScan Human	High (predicted)	MEX3C	MEX3C	-4,396	Class I MHC mediated antigen processing and presentation
hsa-miR-3130-5p	miR-3130-5p (and other miRNAs w/seed ACCCAGU)	-24,471	TargetScan Human	High (predicted)	MFAP1	MFAP1	-5,082	Processing of Capped Intron-Containing Pre-mRNA
hsa-let-7a-2-3p	let-7a-2-3p (and other miRNAs w/seed UGUACAG)	2,248	TargetScan Human	High (predicted)	MFNG	MFNG	6,892	Notch Signaling,Pre-NOTCH Expression and Processing
hsa-miR-485-5p	miR-485-5p (and other miRNAs w/seed GAGGCUG)	-4,079	TargetScan Mouse,TargetScan Human	High (predicted),Moderate (predicted)	MGST3	MGST3	4,436	Apelin Adipocyte Signaling Pathway,Aryl Hydrocarbon Receptor Signaling,FXR/RXR Activation,Glutathione Redox Reactions I,Glutathione-mediated Detoxification,Leukotriene Biosynthesis,LPS/IL-1 Mediated Inhibition of RXR Function,Mitochondrial Dysfunction,NRF2-mediated Oxidative Stress Response,Xenobiotic Metabolism AHR Signaling Pathway,Xenobiotic Metabolism CAR Signaling Pathway,Xenobiotic Metaboli…
hsa-miR-495-3p	miR-495-3p (and other miRNAs w/seed AACAAAC)	-12,236	TargetScan Mouse,TargetScan Human	High (predicted)	MIB1	MIB1	-3,282	Signaling by NOTCH1,Signaling by NOTCH2,Signaling by NOTCH3
hsa-miR-625-5p	miR-625-5p (and other miRNAs w/seed GGGGGAA)	-8,157	TargetScan Mouse,TargetScan Human	High (predicted)	MINK1	MINK1	-1,843	Oxidative Stress Induced Senescence,SAPK/JNK Signaling
hsa-miR-2682-3p	miR-2682-3p (and other miRNAs w/seed GCCUCUU)	-24,471	TargetScan Human	High (predicted)	MLEC	MLEC	7,616	Neutrophil degranulation
hsa-miR-370-3p	miR-370-3p (and other miRNAs w/seed CCUGCUG)	-6,118	TargetScan Mouse,TargetScan Human	High (predicted)	MLEC	MLEC	7,616	Neutrophil degranulation
hsa-miR-654-5p	miR-541-3p (and other miRNAs w/seed GGUGGGC)	-12,236	TargetScan Human	High (predicted)	MLEC	MLEC	7,616	Neutrophil degranulation
hsa-miR-376c-3p	miR-376c-3p (and other miRNAs w/seed ACAUAGA)	-4,079	TargetScan Human	High (predicted)	MLLT11	MLLT11	3,549	Chaperone Mediated Autophagy Signaling Pathway
hsa-miR-496	miR-503-3p (and other miRNAs w/seed GAGUAUU)	-8,157	TargetScan Human	High (predicted)	MMP10	MMP10	154,040	Activation of Matrix Metalloproteinases,Agranulocyte Adhesion and Diapedesis,Axonal Guidance Signaling,Bladder Cancer Signaling,Chaperone Mediated Autophagy Signaling Pathway,Collagen degradation,Colorectal Cancer Metastasis Signaling,Degradation of the extracellular matrix,Estrogen Receptor Signaling,Granulocyte Adhesion and Diapedesis,HEY1 Signaling Pathway,HIF1α Signaling,HOTAIR Regulatory Pat…
hsa-miR-92b-3p	miR-92a-3p (and other miRNAs w/seed AUUGCAC)	76,008	TargetScan Human	High (predicted)	MMP10	MMP10	154,040	Activation of Matrix Metalloproteinases,Agranulocyte Adhesion and Diapedesis,Axonal Guidance Signaling,Bladder Cancer Signaling,Chaperone Mediated Autophagy Signaling Pathway,Collagen degradation,Colorectal Cancer Metastasis Signaling,Degradation of the extracellular matrix,Estrogen Receptor Signaling,Granulocyte Adhesion and Diapedesis,HEY1 Signaling Pathway,HIF1α Signaling,HOTAIR Regulatory Pat…
hsa-miR-193a-5p	miR-193a-5p (miRNAs w/seed GGGUCUU)	-24,471	TargetScan Human	High (predicted)	MON1B	MON1B	12,641	RAB GEFs exchange GTP for GDP on RABs
hsa-miR-376c-5p	miR-376b-5p (and other miRNAs w/seed GUGGAUA)	-24,471	TargetScan Human	High (predicted)	MRAS	MRAS	4,326	14-3-3-mediated Signaling,Actin Cytoskeleton Signaling,Actin Nucleation by ARP-WASP Complex,Acute Myeloid Leukemia Signaling,Acute Phase Response Signaling,Adrenomedullin signaling pathway,Agrin Interactions at Neuromuscular Junction,AMPK Signaling,Androgen Signaling,Angiopoietin Signaling,Antiproliferative Role of Somatostatin Receptor 2,Apelin Endothelial Signaling Pathway,Apelin Muscle Signali…
hsa-miR-485-5p	miR-485-5p (and other miRNAs w/seed GAGGCUG)	-4,079	TargetScan Human	High (predicted)	MRC2	MRC2	346,213	Class I MHC mediated antigen processing and presentation,Phagosome Formation
hsa-miR-381-3p	miR-381-3p (and other miRNAs w/seed AUACAAG)	-12,236	TargetScan Mouse,TargetScan Human	High (predicted),Moderate (predicted)	MRS2	MRS2	9,123	Miscellaneous transport and binding events
hsa-miR-935	miR-935 (miRNAs w/seed CAGUUAC)	4,781	TargetScan Human	High (predicted)	MSH2	MSH2	-3,726	Colorectal Cancer Metastasis Signaling,Hereditary Breast Cancer Signaling,Mismatch Repair,Mismatch Repair in Eukaryotes,Ovarian Cancer Signaling,Role of BRCA1 in DNA Damage Response,TP53 Regulates Transcription of DNA Repair Genes
hsa-miR-409-3p	miR-409-3p (miRNAs w/seed AAUGUUG)	1,226	TargetScan Mouse,TargetScan Human	High (predicted),Moderate (predicted)	MSH6	MSH6	-3,799	Colorectal Cancer Metastasis Signaling,Hereditary Breast Cancer Signaling,Mismatch Repair,Mismatch Repair in Eukaryotes,Ovarian Cancer Signaling,Role of BRCA1 in DNA Damage Response
hsa-miR-654-3p	miR-654-3p (and other miRNAs w/seed AUGUCUG)	-6,118	TargetScan Human	High (predicted)	MST1	MST1	54,960	Chaperone Mediated Autophagy Signaling Pathway,Epithelial Adherens Junction Signaling,HIPPO signaling,IL-12 Signaling and Production in Macrophages,MSP-RON Signaling in Cancer Cells Pathway,MSP-RON Signaling in Macrophages Pathway,MSP-RON Signaling Pathway,Signaling by MST1,Wound Healing Signaling Pathway
hsa-miR-625-5p	miR-625-5p (and other miRNAs w/seed GGGGGAA)	-8,157	TargetScan Human	High (predicted)	MT-ATP8	MT-ATP8	1034,112	Cristae formation,Electron transport, ATP synthesis, and heat production by uncoupling proteins,rRNA processing
hsa-miR-376a-3p	miR-376a-3p (and other miRNAs w/seed UCAUAGA)	-4,894	TargetScan Human	High (predicted)	MT2A	MT2A	265,963	Interferon gamma signaling,Metallothioneins bind metals,Oncostatin M Signaling,SPINK1 General Cancer Pathway
hsa-miR-493-5p	miR-493-5p (miRNAs w/seed UGUACAU)	-24,471	TargetScan Human	High (predicted)	MT2A	MT2A	265,963	Interferon gamma signaling,Metallothioneins bind metals,Oncostatin M Signaling,SPINK1 General Cancer Pathway
hsa-miR-454-3p	miR-130a-3p (and other miRNAs w/seed AGUGCAA)	-24,471	TargetScan Human	High (predicted)	MTCL1	MTCL1	16,944	HER-2 Signaling in Breast Cancer,MicroRNA Biogenesis Signaling Pathway
hsa-miR-654-5p	miR-541-3p (and other miRNAs w/seed GGUGGGC)	-12,236	TargetScan Human	High (predicted)	MVB12B	MVB12B	-7,495	Endosomal Sorting Complex Required For Transport (ESCRT),Late endosomal microautophagy
hsa-miR-381-3p	miR-381-3p (and other miRNAs w/seed AUACAAG)	-12,236	TargetScan Human	High (predicted)	MYL12B	MYL12B	2,061	Actin Cytoskeleton Signaling,Apelin Cardiomyocyte Signaling Pathway,Axonal Guidance Signaling,Cardiac Hypertrophy Signaling,CDC42 Signaling,Cellular Effects of Sildenafil (Viagra),CXCR4 Signaling,EPH-Ephrin signaling,Epithelial Adherens Junction Signaling,Estrogen Receptor Signaling,G-Protein Coupled Receptor Signaling,Gα12/13 Signaling,Hepatic Fibrosis Signaling Pathway,IL-8 Signaling,Integrin S…
hsa-miR-379-3p	miR-411-3p (and other miRNAs w/seed AUGUAAC)	-2,039	TargetScan Human	High (predicted)	MYL12B	MYL12B	2,061	Actin Cytoskeleton Signaling,Apelin Cardiomyocyte Signaling Pathway,Axonal Guidance Signaling,Cardiac Hypertrophy Signaling,CDC42 Signaling,Cellular Effects of Sildenafil (Viagra),CXCR4 Signaling,EPH-Ephrin signaling,Epithelial Adherens Junction Signaling,Estrogen Receptor Signaling,G-Protein Coupled Receptor Signaling,Gα12/13 Signaling,Hepatic Fibrosis Signaling Pathway,IL-8 Signaling,Integrin S…
hsa-miR-625-5p	miR-625-5p (and other miRNAs w/seed GGGGGAA)	-8,157	TargetScan Human	High (predicted)	MYL12B	MYL12B	2,061	Actin Cytoskeleton Signaling,Apelin Cardiomyocyte Signaling Pathway,Axonal Guidance Signaling,Cardiac Hypertrophy Signaling,CDC42 Signaling,Cellular Effects of Sildenafil (Viagra),CXCR4 Signaling,EPH-Ephrin signaling,Epithelial Adherens Junction Signaling,Estrogen Receptor Signaling,G-Protein Coupled Receptor Signaling,Gα12/13 Signaling,Hepatic Fibrosis Signaling Pathway,IL-8 Signaling,Integrin S…
hsa-miR-92b-3p	miR-92a-3p (and other miRNAs w/seed AUUGCAC)	76,008	TargetScan Mouse,TargetScan Human,miRecords	Experimentally Observed,Moderate (predicted)	MYLIP	MYLIP	53,960	Class I MHC mediated antigen processing and presentation,LXR/RXR Activation,NR1H2 and NR1H3-mediated signaling,Plasma lipoprotein assembly, remodeling, and clearance
hsa-miR-204-5p	miR-204-5p (and other miRNAs w/seed UCCCUUU)	85,448	TargetScan Mouse,TargetScan Human	High (predicted),Moderate (predicted)	NAPG	NAPG	2,527	COPI-mediated anterograde transport,COPII-mediated vesicle transport,Glutaminergic Receptor Signaling Pathway (Enhanced),Huntington's Disease Signaling,Insulin Secretion Signaling Pathway,Intra-Golgi and retrograde Golgi-to-ER traffic,Netrin Signaling,Pancreatic Secretion Signaling Pathway,Phagosome Maturation,SNARE Signaling Pathway,Synaptogenesis Signaling Pathway,Tight Junction Signaling
hsa-miR-154-5p	miR-154-5p (miRNAs w/seed AGGUUAU)	-8,157	TargetScan Human	High (predicted)	NCEH1	NCEH1	5,705	Plasma lipoprotein assembly, remodeling, and clearance
hsa-miR-137-3p	miR-137-3p (miRNAs w/seed UAUUGCU)	-8,157	TargetScan Mouse,TargetScan Human	High (predicted),Moderate (predicted)	NCK1	NCK1	-5,179	Actin Nucleation by ARP-WASP Complex,Angiopoietin Signaling,Axonal Guidance Signaling,CTLA4 Signaling in Cytotoxic T Lymphocytes,Ephrin Receptor Signaling,ERBB Signaling,FAK Signaling,Fcgamma receptor (FCGR) dependent phagocytosis,Fcγ Receptor-mediated Phagocytosis in Macrophages and Monocytes,FXR/RXR Activation,G Protein Signaling Mediated by Tubby,GDNF Family Ligand-Receptor Interactions,GP6 Si…
hsa-miR-374a-5p	miR-374b-5p (and other miRNAs w/seed UAUAAUA)	-12,236	TargetScan Human	High (predicted)	NCK1	NCK1	-5,179	Actin Nucleation by ARP-WASP Complex,Angiopoietin Signaling,Axonal Guidance Signaling,CTLA4 Signaling in Cytotoxic T Lymphocytes,Ephrin Receptor Signaling,ERBB Signaling,FAK Signaling,Fcgamma receptor (FCGR) dependent phagocytosis,Fcγ Receptor-mediated Phagocytosis in Macrophages and Monocytes,FXR/RXR Activation,G Protein Signaling Mediated by Tubby,GDNF Family Ligand-Receptor Interactions,GP6 Si…
hsa-miR-505-3p	miR-505-3p (miRNAs w/seed GUCAACA)	-12,236	TargetScan Mouse,TargetScan Human	High (predicted),Moderate (predicted)	NCK2	NCK2	6,684	Actin Nucleation by ARP-WASP Complex,Axonal Guidance Signaling,EPH-Ephrin signaling,Ephrin B Signaling,Ephrin Receptor Signaling,ERBB Signaling,FAK Signaling,Fcγ Receptor-mediated Phagocytosis in Macrophages and Monocytes,ILK Signaling,Integrin Signaling,Nephrin family interactions,Netrin Signaling,PAK Signaling,Paxillin Signaling,RHO GTPase cycle,ROBO SLIT Signaling Pathway,Signaling by PDGF,Sig…
hsa-miR-137-3p	miR-137-3p (miRNAs w/seed UAUUGCU)	-8,157	TargetScan Mouse,TargetScan Human,miRecords	Experimentally Observed,High (predicted)	NCOA2	NCOA2	-29,292	Activated PKN1 stimulates transcription of AR regulated genes KLK2 and KLK3,Activation of gene expression by SREBF (SREBP),Androgen Signaling,Aryl Hydrocarbon Receptor Signaling,Bile acid and bile salt metabolism,BMAL1:CLOCK,NPAS2 activates circadian gene expression,Circadian Clock,Cytoprotection by HMOX1,ESR-mediated signaling,Estrogen Receptor Signaling,Glucocorticoid Receptor Signaling,Heme si…
hsa-miR-181a-2-3p	miR-181a-2-3p (and other miRNAs w/seed CCACUGA)	-24,471	TargetScan Human	High (predicted)	NCOR1	NCOR1	-3,314	Activation of anterior HOX genes in hindbrain during early embryogenesis,Chaperone Mediated Autophagy Signaling Pathway,Circadian Clock,Cytoprotection by HMOX1,Estrogen Receptor Signaling,Generic Transcription Pathway,Glucocorticoid Receptor Signaling,Heme signaling,HEY1 Signaling Pathway,Huntington's Disease Signaling,LXR/RXR Activation,Mitochondrial biogenesis,NR1D1 (REV-ERBA) represses gene ex…
hsa-miR-2116-3p	miR-2116-3p (miRNAs w/seed CUCCCAU)	-24,471	TargetScan Human	High (predicted)	NCR3LG1	NCR3LG1	84,620	Immunoregulatory interactions between a Lymphoid and a non-Lymphoid cell
hsa-miR-2116-3p	miR-2116-3p (miRNAs w/seed CUCCCAU)	-24,471	TargetScan Human	High (predicted)	NDC1	NDC1	-8,562	Cellular response to heat stress,Gene Silencing by RNA,Glucose metabolism,HER-2 Signaling in Breast Cancer,ISG15 antiviral mechanism,Metabolism of non-coding RNA,MicroRNA Biogenesis Signaling Pathway,Mitotic Metaphase and Anaphase,Mitotic Prophase,Processing of Capped Intron-Containing Pre-mRNA,SUMOylation of chromatin organization proteins,SUMOylation of DNA damage response and repair proteins,S…
hsa-miR-134-5p	miR-3118 (and other miRNAs w/seed GUGACUG)	-24,471	TargetScan Human	High (predicted)	NDE1	NDE1	-3,592	Cell Cycle Checkpoints,Cilium Assembly,Mitotic G2-G2/M phases,Mitotic Metaphase and Anaphase,Mitotic Prometaphase,RHO GTPases Activate Formins
hsa-miR-625-5p	miR-625-5p (and other miRNAs w/seed GGGGGAA)	-8,157	TargetScan Human	High (predicted)	NDEL1	NDEL1	-1,869	Cell Cycle Checkpoints,Mitotic Metaphase and Anaphase,Mitotic Prometaphase,Reelin Signaling in Neurons,RHO GTPases Activate Formins
hsa-miR-3187-3p	miR-3187-3p (miRNAs w/seed UGGCCAU)	-24,471	TargetScan Human	High (predicted)	NDUFA10	NDUFA10	2,083	Electron transport, ATP synthesis, and heat production by uncoupling proteins,Estrogen Receptor Signaling,Glucocorticoid Receptor Signaling,Granzyme A Signaling,Mitochondrial Dysfunction,Neutrophil Extracellular Trap Signaling Pathway,Oxidative Phosphorylation,Sirtuin Signaling Pathway
hsa-miR-654-5p	miR-541-3p (and other miRNAs w/seed GGUGGGC)	-12,236	TargetScan Human	High (predicted)	NDUFA10	NDUFA10	2,083	Electron transport, ATP synthesis, and heat production by uncoupling proteins,Estrogen Receptor Signaling,Glucocorticoid Receptor Signaling,Granzyme A Signaling,Mitochondrial Dysfunction,Neutrophil Extracellular Trap Signaling Pathway,Oxidative Phosphorylation,Sirtuin Signaling Pathway
hsa-miR-2682-3p	miR-2682-3p (and other miRNAs w/seed GCCUCUU)	-24,471	TargetScan Human	High (predicted)	NDUFB10	NDUFB10	9,949	Electron transport, ATP synthesis, and heat production by uncoupling proteins,Estrogen Receptor Signaling,Glucocorticoid Receptor Signaling,Granzyme A Signaling,Mitochondrial Dysfunction,Neutrophil Extracellular Trap Signaling Pathway,Oxidative Phosphorylation,Sirtuin Signaling Pathway
hsa-let-7a-2-3p	let-7a-2-3p (and other miRNAs w/seed UGUACAG)	2,248	TargetScan Human	High (predicted)	NDUFB2	NDUFB2	3,454	Electron transport, ATP synthesis, and heat production by uncoupling proteins,Estrogen Receptor Signaling,Glucocorticoid Receptor Signaling,Granzyme A Signaling,Mitochondrial Dysfunction,Neutrophil Extracellular Trap Signaling Pathway,Oxidative Phosphorylation,Sirtuin Signaling Pathway
hsa-miR-149-5p	miR-149-5p (miRNAs w/seed CUGGCUC)	16,673	TargetScan Human	High (predicted)	NDUFB2	NDUFB2	3,454	Electron transport, ATP synthesis, and heat production by uncoupling proteins,Estrogen Receptor Signaling,Glucocorticoid Receptor Signaling,Granzyme A Signaling,Mitochondrial Dysfunction,Neutrophil Extracellular Trap Signaling Pathway,Oxidative Phosphorylation,Sirtuin Signaling Pathway
hsa-miR-370-3p	miR-370-3p (and other miRNAs w/seed CCUGCUG)	-6,118	TargetScan Human	High (predicted)	NDUFB4	NDUFB4	96,518	Electron transport, ATP synthesis, and heat production by uncoupling proteins,Estrogen Receptor Signaling,Glucocorticoid Receptor Signaling,Granzyme A Signaling,Mitochondrial Dysfunction,Neutrophil Extracellular Trap Signaling Pathway,Oxidative Phosphorylation,Sirtuin Signaling Pathway
hsa-miR-505-3p	miR-505-3p (miRNAs w/seed GUCAACA)	-12,236	TargetScan Human	High (predicted)	NDUFC2	NDUFC2	349,764	Electron transport, ATP synthesis, and heat production by uncoupling proteins,Neutrophil degranulation
hsa-miR-214-3p	miR-214-3p (and other miRNAs w/seed CAGCAGG)	-4,894	TargetScan Human	High (predicted)	NECTIN1	NECTIN1	2,021	Cell junction organization,Epithelial Adherens Junction Signaling,Sertoli Cell-Germ Cell Junction Signaling Pathway (Enhanced),Sertoli Cell-Sertoli Cell Junction Signaling,Synaptogenesis Signaling Pathway,Tight Junction Signaling
hsa-miR-654-5p	miR-541-3p (and other miRNAs w/seed GGUGGGC)	-12,236	TargetScan Human	High (predicted)	NECTIN1	NECTIN1	2,021	Cell junction organization,Epithelial Adherens Junction Signaling,Sertoli Cell-Germ Cell Junction Signaling Pathway (Enhanced),Sertoli Cell-Sertoli Cell Junction Signaling,Synaptogenesis Signaling Pathway,Tight Junction Signaling
hsa-miR-625-5p	miR-625-5p (and other miRNAs w/seed GGGGGAA)	-8,157	TargetScan Mouse,TargetScan Human	High (predicted)	NECTIN1	NECTIN1	2,021	Cell junction organization,Epithelial Adherens Junction Signaling,Sertoli Cell-Germ Cell Junction Signaling Pathway (Enhanced),Sertoli Cell-Sertoli Cell Junction Signaling,Synaptogenesis Signaling Pathway,Tight Junction Signaling
hsa-miR-323a-3p	miR-323-3p (and other miRNAs w/seed ACAUUAC)	-6,118	TargetScan Human	High (predicted)	NEDD8	NEDD8	2,349	Aryl Hydrocarbon Receptor Signaling,C-type lectin receptors (CLRs),Cargo recognition for clathrin-mediated endocytosis,Deubiquitination,Iron uptake and transport,Neddylation,NER (Nucleotide Excision Repair, Enhanced Pathway),NIK-->noncanonical NF-kB signaling,Signaling by TGF-beta Receptor Complex
hsa-miR-199a-3p	miR-199a-3p (and other miRNAs w/seed CAGUAGU)	-1,224	TargetScan Mouse,TargetScan Human	High (predicted)	NID2	NID2	141,690	Extracellular matrix organization
hsa-miR-625-5p	miR-625-5p (and other miRNAs w/seed GGGGGAA)	-8,157	TargetScan Mouse,TargetScan Human	High (predicted),Moderate (predicted)	NIPAL2	NIPAL2	53,974	Miscellaneous transport and binding events
hsa-miR-1180-3p	miR-1180-3p (miRNAs w/seed UUCCGGC)	-2,225	TargetScan Human	High (predicted)	NKIRAS2	NKIRAS2	3,471	Cytosolic sensors of pathogen-associated DNA,DDX58/IFIH1-mediated induction of interferon-alpha/beta,TAK1-dependent IKK and NF-kappa-B activation
hsa-miR-431-5p	miR-431-5p (and other miRNAs w/seed GUCUUGC)	-6,118	TargetScan Mouse,TargetScan Human	High (predicted),Moderate (predicted)	NKIRAS2	NKIRAS2	3,471	Cytosolic sensors of pathogen-associated DNA,DDX58/IFIH1-mediated induction of interferon-alpha/beta,TAK1-dependent IKK and NF-kappa-B activation
hsa-miR-625-5p	miR-625-5p (and other miRNAs w/seed GGGGGAA)	-8,157	TargetScan Human	High (predicted)	NKIRAS2	NKIRAS2	3,471	Cytosolic sensors of pathogen-associated DNA,DDX58/IFIH1-mediated induction of interferon-alpha/beta,TAK1-dependent IKK and NF-kappa-B activation
hsa-miR-199a-3p	miR-199a-3p (and other miRNAs w/seed CAGUAGU)	-1,224	TargetScan Mouse,TargetScan Human	High (predicted)	NLK	NLK	-9,168	Beta-catenin independent WNT signaling,Role of Macrophages, Fibroblasts and Endothelial Cells in Rheumatoid Arthritis,WNT/β-catenin Signaling
hsa-miR-323a-3p	miR-323-3p (and other miRNAs w/seed ACAUUAC)	-6,118	TargetScan Mouse,TargetScan Human	High (predicted),Moderate (predicted)	NLK	NLK	-9,168	Beta-catenin independent WNT signaling,Role of Macrophages, Fibroblasts and Endothelial Cells in Rheumatoid Arthritis,WNT/β-catenin Signaling
hsa-miR-149-5p	miR-149-5p (miRNAs w/seed CUGGCUC)	16,673	TargetScan Human	High (predicted)	NLRC5	NLRC5	48,161	Antigen Presentation Pathway,DDX58/IFIH1-mediated induction of interferon-alpha/beta,Pathogen Induced Cytokine Storm Signaling Pathway,TAK1-dependent IKK and NF-kappa-B activation,TREM1 Signaling
hsa-miR-99a-5p	miR-100-5p (and other miRNAs w/seed ACCCGUA)	7,437	TargetScan Human	High (predicted)	NLRP2	NLRP2	58,760	Oxytocin in Brain Signaling Pathway,Pathogen Induced Cytokine Storm Signaling Pathway,Pyroptosis Signaling Pathway,Role of PKR in Interferon Induction and Antiviral Response,TREM1 Signaling
hsa-miR-193b-3p	miR-193a-3p (and other miRNAs w/seed ACUGGCC)	-12,236	TargetScan Human	High (predicted)	NME1	NME1	-3,346	Granzyme A Signaling,Interconversion of nucleotide di- and triphosphates,Pyrimidine Deoxyribonucleotides De Novo Biosynthesis I,Pyrimidine Ribonucleotides De Novo Biosynthesis,Pyrimidine Ribonucleotides Interconversion,Remodeling of Epithelial Adherens Junctions,Salvage Pathways of Pyrimidine Ribonucleotides
hsa-miR-197-3p	miR-197-3p (and other miRNAs w/seed UCACCAC)	-2,039	TargetScan Human	High (predicted)	NME1	NME1	-3,346	Granzyme A Signaling,Interconversion of nucleotide di- and triphosphates,Pyrimidine Deoxyribonucleotides De Novo Biosynthesis I,Pyrimidine Ribonucleotides De Novo Biosynthesis,Pyrimidine Ribonucleotides Interconversion,Remodeling of Epithelial Adherens Junctions,Salvage Pathways of Pyrimidine Ribonucleotides
hsa-miR-3187-3p	miR-3187-3p (miRNAs w/seed UGGCCAU)	-24,471	TargetScan Human	High (predicted)	NME1	NME1	-3,346	Granzyme A Signaling,Interconversion of nucleotide di- and triphosphates,Pyrimidine Deoxyribonucleotides De Novo Biosynthesis I,Pyrimidine Ribonucleotides De Novo Biosynthesis,Pyrimidine Ribonucleotides Interconversion,Remodeling of Epithelial Adherens Junctions,Salvage Pathways of Pyrimidine Ribonucleotides
hsa-miR-3613-5p	miR-3613-5p (miRNAs w/seed GUUGUAC)	-24,471	TargetScan Human	High (predicted)	NME1	NME1	-3,346	Granzyme A Signaling,Interconversion of nucleotide di- and triphosphates,Pyrimidine Deoxyribonucleotides De Novo Biosynthesis I,Pyrimidine Ribonucleotides De Novo Biosynthesis,Pyrimidine Ribonucleotides Interconversion,Remodeling of Epithelial Adherens Junctions,Salvage Pathways of Pyrimidine Ribonucleotides
hsa-miR-376a-3p	miR-376a-3p (and other miRNAs w/seed UCAUAGA)	-4,894	TargetScan Human	High (predicted)	NME1	NME1	-3,346	Granzyme A Signaling,Interconversion of nucleotide di- and triphosphates,Pyrimidine Deoxyribonucleotides De Novo Biosynthesis I,Pyrimidine Ribonucleotides De Novo Biosynthesis,Pyrimidine Ribonucleotides Interconversion,Remodeling of Epithelial Adherens Junctions,Salvage Pathways of Pyrimidine Ribonucleotides
hsa-miR-654-5p	miR-541-3p (and other miRNAs w/seed GGUGGGC)	-12,236	TargetScan Human	High (predicted)	NOTCH4	NOTCH4	-3,789	Chronic Myeloid Leukemia Signaling,Epithelial Adherens Junction Signaling,Generic Transcription Pathway,HEY1 Signaling Pathway,Notch Signaling,Pre-NOTCH Expression and Processing,Pulmonary Fibrosis Idiopathic Signaling Pathway,Pulmonary Healing Signaling Pathway,Regulation of the Epithelial-Mesenchymal Transition Pathway,Signaling by NOTCH4,Th1 and Th2 Activation Pathway,Th1 Pathway,Th2 Pathway
hsa-miR-625-5p	miR-625-5p (and other miRNAs w/seed GGGGGAA)	-8,157	TargetScan Mouse,TargetScan Human	High (predicted)	NR1D1	NR1D1	-5,333	Adipogenesis pathway,Circadian Clock,Circadian Rhythm Signaling,Generic Transcription Pathway,Heme signaling,Mitochondrial biogenesis,NR1D1 (REV-ERBA) represses gene expression,Regulation of lipid metabolism by PPARalpha
hsa-miR-323a-5p	miR-323-5p (and other miRNAs w/seed GGUGGUC)	-8,157	TargetScan Human	High (predicted)	NRG1	NRG1	-2,690	Activation of NMDA receptors and postsynaptic events,Agrin Interactions at Neuromuscular Junction,Cell Cycle: G1/S Checkpoint Regulation,ERB2-ERBB3 Signaling,ERBB Signaling,ERBB4 Signaling,HER-2 Signaling in Breast Cancer,Myelination Signaling Pathway,Neuregulin Signaling,PIP3 activates AKT signaling,RAF/MAP kinase cascade,Signaling by ERBB2,Signaling by ERBB4,Signaling by PTK6
hsa-miR-485-3p	miR-485-3p (and other miRNAs w/seed UCAUACA)	-12,236	TargetScan Human	High (predicted)	NRG1	NRG1	-2,690	Activation of NMDA receptors and postsynaptic events,Agrin Interactions at Neuromuscular Junction,Cell Cycle: G1/S Checkpoint Regulation,ERB2-ERBB3 Signaling,ERBB Signaling,ERBB4 Signaling,HER-2 Signaling in Breast Cancer,Myelination Signaling Pathway,Neuregulin Signaling,PIP3 activates AKT signaling,RAF/MAP kinase cascade,Signaling by ERBB2,Signaling by ERBB4,Signaling by PTK6
hsa-miR-193a-5p	miR-193a-5p (miRNAs w/seed GGGUCUU)	-24,471	TargetScan Human	High (predicted)	NSFL1C	NSFL1C	-2,100	RHO GTPase cycle
hsa-miR-654-5p	miR-541-3p (and other miRNAs w/seed GGUGGGC)	-12,236	TargetScan Human	High (predicted)	NUP188	NUP188	-3,469	Cellular response to heat stress,Gene Silencing by RNA,Glucose metabolism,HER-2 Signaling in Breast Cancer,ISG15 antiviral mechanism,Metabolism of non-coding RNA,MicroRNA Biogenesis Signaling Pathway,Mitotic Metaphase and Anaphase,Mitotic Prophase,Processing of Capped Intron-Containing Pre-mRNA,SUMOylation of chromatin organization proteins,SUMOylation of DNA damage response and repair proteins,S…
hsa-miR-323b-3p	miR-323b-3p (miRNAs w/seed CCAAUAC)	-12,236	TargetScan Human	High (predicted)	NUP35	NUP35	-8,912	Cellular response to heat stress,Gene Silencing by RNA,Glucose metabolism,HER-2 Signaling in Breast Cancer,ISG15 antiviral mechanism,Metabolism of non-coding RNA,MicroRNA Biogenesis Signaling Pathway,Mitotic Metaphase and Anaphase,Mitotic Prophase,Processing of Capped Intron-Containing Pre-mRNA,SUMOylation of chromatin organization proteins,SUMOylation of DNA damage response and repair proteins,S…
hsa-miR-323a-5p	miR-323-5p (and other miRNAs w/seed GGUGGUC)	-8,157	TargetScan Human	High (predicted)	NUP85	NUP85	-2,258	Cell Cycle Checkpoints,Cellular response to heat stress,Gene Silencing by RNA,Glucose metabolism,HER-2 Signaling in Breast Cancer,ISG15 antiviral mechanism,Metabolism of non-coding RNA,MicroRNA Biogenesis Signaling Pathway,Mitotic Metaphase and Anaphase,Mitotic Prometaphase,Mitotic Prophase,Processing of Capped Intron-Containing Pre-mRNA,RHO GTPases Activate Formins,SUMOylation of chromatin organ…
hsa-miR-485-5p	miR-485-5p (and other miRNAs w/seed GAGGCUG)	-4,079	TargetScan Human	High (predicted)	NXN	NXN	-5,607	Antioxidant Action of Vitamin C,Thioredoxin Pathway,Vitamin-C Transport
hsa-miR-3152-5p	miR-3152-5p (miRNAs w/seed UUGCCUC)	-24,471	TargetScan Human	High (predicted)	ORAI2	ORAI2	4,263	AMPK Signaling,Cardiac conduction,Gustation Pathway,Neurovascular Coupling Signaling Pathway,Neutrophil Extracellular Trap Signaling Pathway,Platelet homeostasis,Serotonin Receptor Signaling,Signaling by the B Cell Receptor (BCR)
hsa-miR-625-5p	miR-625-5p (and other miRNAs w/seed GGGGGAA)	-8,157	TargetScan Human	High (predicted)	ORAI3	ORAI3	3,983	Neutrophil Extracellular Trap Signaling Pathway,Serotonin Receptor Signaling
hsa-miR-625-5p	miR-625-5p (and other miRNAs w/seed GGGGGAA)	-8,157	TargetScan Mouse,TargetScan Human	High (predicted),Moderate (predicted)	ORMDL3	ORMDL3	3,941	Neutrophil degranulation,Sphingolipid metabolism
hsa-miR-654-5p	miR-541-3p (and other miRNAs w/seed GGUGGGC)	-12,236	TargetScan Human	High (predicted)	OS9	OS9	6,824	ABC-family proteins mediated transport,Hedgehog ligand biogenesis,Unfolded protein response
hsa-miR-92b-3p	miR-92a-3p (and other miRNAs w/seed AUUGCAC)	76,008	TargetScan Mouse,TargetScan Human	High (predicted),Moderate (predicted)	P3H3	P3H3	5,035	Collagen biosynthesis and modifying enzymes
hsa-miR-1180-3p	miR-1180-3p (miRNAs w/seed UUCCGGC)	-2,225	TargetScan Human	High (predicted)	P4HB	P4HB	5,149	Cachexia Signaling Pathway,Collagen biosynthesis and modifying enzymes,Detoxification of Reactive Oxygen Species,Hedgehog ligand biogenesis,Hypoxia Signaling in the Cardiovascular System,IL-17A Signaling in Fibroblasts,Insulin processing,Interleukin-12 family signaling,Plasma lipoprotein assembly, remodeling, and clearance,Post-translational protein phosphorylation,Regulation of Insulin-like Grow…
hsa-miR-376c-3p	miR-376c-3p (and other miRNAs w/seed ACAUAGA)	-4,079	TargetScan Mouse,TargetScan Human	High (predicted),Moderate (predicted)	PAFAH1B1	PAFAH1B1	-3,506	Cell Cycle Checkpoints,Cilium Assembly,Intra-Golgi and retrograde Golgi-to-ER traffic,Mitotic G2-G2/M phases,Mitotic Metaphase and Anaphase,Mitotic Prometaphase,Reelin Signaling in Neurons,RHO GTPases Activate Formins,Synaptogenesis Signaling Pathway
hsa-miR-409-3p	miR-409-3p (miRNAs w/seed AAUGUUG)	1,226	TargetScan Human	High (predicted)	PAFAH1B3	PAFAH1B3	19,719	Intra-Golgi and retrograde Golgi-to-ER traffic,Reelin Signaling in Neurons
hsa-miR-485-5p	miR-485-5p (and other miRNAs w/seed GAGGCUG)	-4,079	TargetScan Mouse,TargetScan Human	High (predicted)	PAK1	PAK1	-4,804	Actin Cytoskeleton Signaling,Agrin Interactions at Neuromuscular Junction,Amyotrophic Lateral Sclerosis Signaling,Angiopoietin Signaling,Axonal Guidance Signaling,Breast Cancer Regulation by Stathmin1,C-type lectin receptors (CLRs),CCR3 Signaling in Eosinophils,CD28 Signaling in T Helper Cells,CDC42 Signaling,Costimulation by the CD28 family,CXCR4 Signaling,EPH-Ephrin signaling,Ephrin A Signaling…
hsa-miR-149-5p	miR-149-5p (miRNAs w/seed CUGGCUC)	16,673	TargetScan Mouse,TargetScan Human	High (predicted),Moderate (predicted)	PAK3	PAK3	-170,549	Actin Cytoskeleton Signaling,Agrin Interactions at Neuromuscular Junction,Angiopoietin Signaling,Axonal Guidance Signaling,C-type lectin receptors (CLRs),CCR3 Signaling in Eosinophils,CDC42 Signaling,Costimulation by the CD28 family,CXCR4 Signaling,EPH-Ephrin signaling,Ephrin Receptor Signaling,Epithelial Adherens Junction Signaling,ERBB Signaling,ERK/MAPK Signaling,FAK Signaling,G-Protein Couple…
hsa-miR-193b-3p	miR-193a-3p (and other miRNAs w/seed ACUGGCC)	-12,236	TargetScan Mouse,TargetScan Human	High (predicted),Moderate (predicted)	PAK3	PAK3	-170,549	Actin Cytoskeleton Signaling,Agrin Interactions at Neuromuscular Junction,Angiopoietin Signaling,Axonal Guidance Signaling,C-type lectin receptors (CLRs),CCR3 Signaling in Eosinophils,CDC42 Signaling,Costimulation by the CD28 family,CXCR4 Signaling,EPH-Ephrin signaling,Ephrin Receptor Signaling,Epithelial Adherens Junction Signaling,ERBB Signaling,ERK/MAPK Signaling,FAK Signaling,G-Protein Couple…
hsa-miR-137-3p	miR-137-3p (miRNAs w/seed UAUUGCU)	-8,157	TargetScan Human	High (predicted)	PALM2AKAP2	PALM2AKAP2	3,128	cAMP-mediated signaling,Cardiac β-adrenergic Signaling,Protein Kinase A Signaling
hsa-miR-2682-3p	miR-2682-3p (and other miRNAs w/seed GCCUCUU)	-24,471	TargetScan Human	High (predicted)	PALM2AKAP2	PALM2AKAP2	3,128	cAMP-mediated signaling,Cardiac β-adrenergic Signaling,Protein Kinase A Signaling
hsa-miR-625-5p	miR-625-5p (and other miRNAs w/seed GGGGGAA)	-8,157	TargetScan Human	High (predicted)	PALM2AKAP2	PALM2AKAP2	3,128	cAMP-mediated signaling,Cardiac β-adrenergic Signaling,Protein Kinase A Signaling
hsa-miR-454-3p	miR-130a-3p (and other miRNAs w/seed AGUGCAA)	-24,471	TargetScan Mouse,TargetScan Human	High (predicted)	PAN3	PAN3	-9,177	Deadenylation-dependent mRNA decay
hsa-miR-137-3p	miR-137-3p (miRNAs w/seed UAUUGCU)	-8,157	TargetScan Human	High (predicted)	PARP4	PARP4	9,561	Death Receptor Signaling,Multiple Sclerosis Signaling Pathway,NAD Signaling Pathway,Retinoic acid Mediated Apoptosis Signaling,Ribonucleotide Reductase Signaling Pathway,UVA-Induced MAPK Signaling
hsa-miR-376c-3p	miR-376c-3p (and other miRNAs w/seed ACAUAGA)	-4,079	TargetScan Mouse,TargetScan Human	High (predicted),Moderate (predicted)	PARP4	PARP4	9,561	Death Receptor Signaling,Multiple Sclerosis Signaling Pathway,NAD Signaling Pathway,Retinoic acid Mediated Apoptosis Signaling,Ribonucleotide Reductase Signaling Pathway,UVA-Induced MAPK Signaling
hsa-miR-154-5p	miR-154-5p (miRNAs w/seed AGGUUAU)	-8,157	TargetScan Mouse,TargetScan Human	High (predicted)	PCNA	PCNA	-3,628	BER (Base Excision Repair) Pathway,Cell Cycle Control of Chromosomal Replication,DNA Damage Bypass,E3 ubiquitin ligases ubiquitinate target proteins,Estrogen Receptor Signaling,FAT10 Cancer Signaling Pathway,GADD45 Signaling,HDR through Homologous Recombination (HRR) or Single Strand Annealing (SSA),ISGylation Signaling Pathway,Mismatch Repair,Mismatch Repair in Eukaryotes,Mitotic G1 phase and G1…
hsa-miR-377-3p	miR-377-3p (miRNAs w/seed UCACACA)	-24,471	TargetScan Human	High (predicted)	PCOLCE2	PCOLCE2	-131,615	Collagen biosynthesis and modifying enzymes
hsa-miR-92b-3p	miR-92a-3p (and other miRNAs w/seed AUUGCAC)	76,008	TargetScan Mouse,TargetScan Human	High (predicted)	PCOLCE2	PCOLCE2	-131,615	Collagen biosynthesis and modifying enzymes
hsa-miR-3187-3p	miR-3187-3p (miRNAs w/seed UGGCCAU)	-24,471	TargetScan Human	High (predicted)	PDCD1LG2	PDCD1LG2	34,718	Costimulation by the CD28 family,PD-1, PD-L1 cancer immunotherapy pathway,T Cell Exhaustion Signaling Pathway,Tumor Microenvironment Pathway
hsa-miR-204-5p	miR-204-5p (and other miRNAs w/seed UCCCUUU)	85,448	TargetScan Human	High (predicted)	PDE3A	PDE3A	29,909	cAMP-mediated signaling,Cardiac Hypertrophy Signaling (Enhanced),Cardiac β-adrenergic Signaling,Cellular Effects of Sildenafil (Viagra),Dilated Cardiomyopathy Signaling Pathway,G alpha (s) signalling events,G-Protein Coupled Receptor Signaling,Gustation Pathway,Leptin Signaling in Obesity,Protein Kinase A Signaling,RAR Activation,Relaxin Signaling,tRNA Splicing
hsa-miR-625-5p	miR-625-5p (and other miRNAs w/seed GGGGGAA)	-8,157	TargetScan Mouse,TargetScan Human	High (predicted)	PDE4A	PDE4A	13,385	cAMP-mediated signaling,Cardiac Hypertrophy Signaling (Enhanced),Cardiac β-adrenergic Signaling,Cellular Effects of Sildenafil (Viagra),G alpha (s) signalling events,G-Protein Coupled Receptor Signaling,Opioid Signalling,Protein Kinase A Signaling,RAR Activation,Relaxin Signaling,Semaphorin Neuronal Repulsive Signaling Pathway,Sleep REM Signaling Pathway,Sperm Motility,tRNA Splicing
hsa-miR-431-5p	miR-431-5p (and other miRNAs w/seed GUCUUGC)	-6,118	TargetScan Human	High (predicted)	PDE7A	PDE7A	-5,227	cAMP-mediated signaling,Cardiac Hypertrophy Signaling (Enhanced),Cardiac β-adrenergic Signaling,G alpha (s) signalling events,G-Protein Coupled Receptor Signaling,Protein Kinase A Signaling,RAR Activation,Relaxin Signaling,tRNA Splicing
hsa-miR-625-5p	miR-625-5p (and other miRNAs w/seed GGGGGAA)	-8,157	TargetScan Human	High (predicted)	PDGFB	PDGFB	3,109	Actin Cytoskeleton Signaling,Atherosclerosis Signaling,Autophagy,Axonal Guidance Signaling,Breast Cancer Regulation by Stathmin1,Clathrin-mediated Endocytosis Signaling,CLEAR Signaling Pathway,CREB Signaling in Neurons,DHCR24 Signaling Pathway,Docosahexaenoic Acid (DHA) Signaling,Ephrin Receptor Signaling,Extracellular matrix organization,Glioblastoma Multiforme Signaling,Glioma Signaling,Hepatic…
hsa-miR-197-3p	miR-197-3p (and other miRNAs w/seed UCACCAC)	-2,039	TargetScan Mouse,TargetScan Human	High (predicted),Moderate (predicted)	PDGFC	PDGFC	42,792	ABRA Signaling Pathway,Actin Cytoskeleton Signaling,Amyotrophic Lateral Sclerosis Signaling,Atherosclerosis Signaling,Axonal Guidance Signaling,BEX2 Signaling Pathway,Bladder Cancer Signaling,Breast Cancer Regulation by Stathmin1,Clathrin-mediated Endocytosis Signaling,Colorectal Cancer Metastasis Signaling,DHCR24 Signaling Pathway,Eicosanoid Signaling,Endocannabinoid Cancer Inhibition Pathway,eN…
hsa-miR-377-3p	miR-377-3p (miRNAs w/seed UCACACA)	-24,471	TargetScan Human	High (predicted)	PDK3	PDK3	5,969	Reelin Signaling in Neurons,Senescence Pathway,Signaling by Retinoic Acid,The citric acid (TCA) cycle and respiratory electron transport
hsa-miR-377-3p	miR-377-3p (miRNAs w/seed UCACACA)	-24,471	TargetScan Mouse,TargetScan Human	High (predicted)	PDK4	PDK4	47,227	Glucocorticoid Receptor Signaling,Reelin Signaling in Neurons,Senescence Pathway,Signaling by Retinoic Acid,The citric acid (TCA) cycle and respiratory electron transport
hsa-miR-149-5p	miR-149-5p (miRNAs w/seed CUGGCUC)	16,673	TargetScan Mouse,TargetScan Human	High (predicted)	PEA15	PEA15	2,417	Chaperone Mediated Autophagy Signaling Pathway,RAF-independent MAPK1/3 activation,RAF/MAP kinase cascade
hsa-miR-2116-3p	miR-2116-3p (miRNAs w/seed CUCCCAU)	-24,471	TargetScan Human	High (predicted)	PEA15	PEA15	2,417	Chaperone Mediated Autophagy Signaling Pathway,RAF-independent MAPK1/3 activation,RAF/MAP kinase cascade
hsa-miR-654-5p	miR-541-3p (and other miRNAs w/seed GGUGGGC)	-12,236	TargetScan Human	High (predicted)	PEA15	PEA15	2,417	Chaperone Mediated Autophagy Signaling Pathway,RAF-independent MAPK1/3 activation,RAF/MAP kinase cascade
hsa-miR-625-5p	miR-625-5p (and other miRNAs w/seed GGGGGAA)	-8,157	TargetScan Mouse,TargetScan Human	High (predicted),Moderate (predicted)	PEA15	PEA15	2,417	Chaperone Mediated Autophagy Signaling Pathway,RAF-independent MAPK1/3 activation,RAF/MAP kinase cascade
hsa-miR-214-3p	miR-214-3p (and other miRNAs w/seed CAGCAGG)	-4,894	TargetScan Mouse,TargetScan Human	High (predicted),Moderate (predicted)	PELI3	PELI3	58,778	Interleukin-1 family signaling,MyD88 cascade initiated on plasma membrane,MyD88 dependent cascade initiated on endosome,MyD88:MAL(TIRAP) cascade initiated on plasma membrane,NOD1/2 Signaling Pathway
hsa-miR-654-5p	miR-541-3p (and other miRNAs w/seed GGUGGGC)	-12,236	TargetScan Human	High (predicted)	PELI3	PELI3	58,778	Interleukin-1 family signaling,MyD88 cascade initiated on plasma membrane,MyD88 dependent cascade initiated on endosome,MyD88:MAL(TIRAP) cascade initiated on plasma membrane,NOD1/2 Signaling Pathway
hsa-miR-3130-5p	miR-3130-5p (and other miRNAs w/seed ACCCAGU)	-24,471	TargetScan Human	High (predicted)	PEX3	PEX3	-14,362	ABC-family proteins mediated transport,Class I peroxisomal membrane protein import
hsa-miR-323a-5p	miR-323-5p (and other miRNAs w/seed GGUGGUC)	-8,157	TargetScan Human	High (predicted)	PGAM5	PGAM5	2,900	3-phosphoinositide Biosynthesis,3-phosphoinositide Degradation,D-myo-inositol (1,4,5,6)-Tetrakisphosphate Biosynthesis,D-myo-inositol (3,4,5,6)-tetrakisphosphate Biosynthesis,D-myo-inositol-5-phosphate Metabolism,Immunogenic Cell Death Signaling Pathway,Mitophagy,Necroptosis Signaling Pathway,Role of Chondrocytes in Rheumatoid Arthritis Signaling Pathway,Superpathway of Inositol Phosphate Compoun…
hsa-miR-654-5p	miR-541-3p (and other miRNAs w/seed GGUGGGC)	-12,236	TargetScan Human	High (predicted)	PGAM5	PGAM5	2,900	3-phosphoinositide Biosynthesis,3-phosphoinositide Degradation,D-myo-inositol (1,4,5,6)-Tetrakisphosphate Biosynthesis,D-myo-inositol (3,4,5,6)-tetrakisphosphate Biosynthesis,D-myo-inositol-5-phosphate Metabolism,Immunogenic Cell Death Signaling Pathway,Mitophagy,Necroptosis Signaling Pathway,Role of Chondrocytes in Rheumatoid Arthritis Signaling Pathway,Superpathway of Inositol Phosphate Compoun…
hsa-miR-130b-5p	miR-130b-5p (and other miRNAs w/seed CUCUUUC)	-1,165	TargetScan Human	High (predicted)	PGF	PGF	103,738	ABRA Signaling Pathway,Amyotrophic Lateral Sclerosis Signaling,Axonal Guidance Signaling,BEX2 Signaling Pathway,Bladder Cancer Signaling,Breast Cancer Regulation by Stathmin1,Clathrin-mediated Endocytosis Signaling,Colorectal Cancer Metastasis Signaling,Eicosanoid Signaling,Endocannabinoid Cancer Inhibition Pathway,eNOS Signaling,Ephrin Receptor Signaling,Estrogen Receptor Signaling,Hepatic Fibro…
hsa-miR-214-3p	miR-214-3p (and other miRNAs w/seed CAGCAGG)	-4,894	TargetScan Mouse,TargetScan Human	High (predicted)	PGF	PGF	103,738	ABRA Signaling Pathway,Amyotrophic Lateral Sclerosis Signaling,Axonal Guidance Signaling,BEX2 Signaling Pathway,Bladder Cancer Signaling,Breast Cancer Regulation by Stathmin1,Clathrin-mediated Endocytosis Signaling,Colorectal Cancer Metastasis Signaling,Eicosanoid Signaling,Endocannabinoid Cancer Inhibition Pathway,eNOS Signaling,Ephrin Receptor Signaling,Estrogen Receptor Signaling,Hepatic Fibro…
hsa-miR-431-5p	miR-431-5p (and other miRNAs w/seed GUCUUGC)	-6,118	TargetScan Mouse,TargetScan Human	High (predicted)	PGF	PGF	103,738	ABRA Signaling Pathway,Amyotrophic Lateral Sclerosis Signaling,Axonal Guidance Signaling,BEX2 Signaling Pathway,Bladder Cancer Signaling,Breast Cancer Regulation by Stathmin1,Clathrin-mediated Endocytosis Signaling,Colorectal Cancer Metastasis Signaling,Eicosanoid Signaling,Endocannabinoid Cancer Inhibition Pathway,eNOS Signaling,Ephrin Receptor Signaling,Estrogen Receptor Signaling,Hepatic Fibro…
hsa-miR-137-3p	miR-137-3p (miRNAs w/seed UAUUGCU)	-8,157	TargetScan Mouse,TargetScan Human	High (predicted),Moderate (predicted)	PGM2	PGM2	-4,266	GDP-glucose Biosynthesis,Glucose and Glucose-1-phosphate Degradation,Glycogen Degradation II,Glycogen Degradation III,Neutrophil degranulation,Purine Ribonucleosides Degradation to Ribose-1-phosphate
hsa-miR-3187-3p	miR-3187-3p (miRNAs w/seed UGGCCAU)	-24,471	TargetScan Human	High (predicted)	PGM2	PGM2	-4,266	GDP-glucose Biosynthesis,Glucose and Glucose-1-phosphate Degradation,Glycogen Degradation II,Glycogen Degradation III,Neutrophil degranulation,Purine Ribonucleosides Degradation to Ribose-1-phosphate
hsa-miR-625-5p	miR-625-5p (and other miRNAs w/seed GGGGGAA)	-8,157	TargetScan Mouse,TargetScan Human	High (predicted),Moderate (predicted)	PGRMC2	PGRMC2	2,122	Heme signaling,RHO GTPase cycle
hsa-miR-409-3p	miR-409-3p (miRNAs w/seed AAUGUUG)	1,226	TargetScan Human	High (predicted)	PHF10	PHF10	-3,718	AMPK Signaling,Glucocorticoid Receptor Signaling,Hereditary Breast Cancer Signaling,RAR Activation,Ribonucleotide Reductase Signaling Pathway,Role of BRCA1 in DNA Damage Response
hsa-miR-137-3p	miR-137-3p (miRNAs w/seed UAUUGCU)	-8,157	TargetScan Human	High (predicted)	PHGDH	PHGDH	-65,007	Cachexia Signaling Pathway,Serine Biosynthesis,Superpathway of Serine and Glycine Biosynthesis I
hsa-miR-625-5p	miR-625-5p (and other miRNAs w/seed GGGGGAA)	-8,157	TargetScan Human	High (predicted)	PHLPP1	PHLPP1	-2,866	AMPK Signaling,Chaperone Mediated Autophagy Signaling Pathway,PIP3 activates AKT signaling
hsa-miR-137-3p	miR-137-3p (miRNAs w/seed UAUUGCU)	-8,157	TargetScan Mouse,TargetScan Human	High (predicted)	PIAS2	PIAS2	-3,825	Activation of anterior HOX genes in hindbrain during early embryogenesis,IL-12 Signaling and Production in Macrophages,JAK/STAT Signaling,SUMOylation of chromatin organization proteins,SUMOylation of DNA damage response and repair proteins,SUMOylation of intracellular receptors,SUMOylation of transcription cofactors,SUMOylation of transcription factors,SUMOylation of ubiquitinylation proteins
hsa-miR-155-5p	miR-155-5p (miRNAs w/seed UAAUGCU)	2,493	TargetScan Mouse,Ingenuity Expert Findings,TarBase,TargetScan Human	Experimentally Observed,High (predicted)	PICALM	PICALM	-2,759	Cargo recognition for clathrin-mediated endocytosis,Clathrin-mediated endocytosis,Clathrin-mediated Endocytosis Signaling,RHO GTPase cycle,trans-Golgi Network Vesicle Budding
hsa-miR-454-3p	miR-130a-3p (and other miRNAs w/seed AGUGCAA)	-24,471	TargetScan Mouse,TargetScan Human	High (predicted)	PIK3CB	PIK3CB	-2,873	14-3-3-mediated Signaling,3-phosphoinositide Biosynthesis,Acetylcholine Receptor Signaling Pathway,Actin Cytoskeleton Signaling,Activin Inhibin Signaling Pathway,Acute Myeloid Leukemia Signaling,Acute Phase Response Signaling,Adrenomedullin signaling pathway,Aldosterone Signaling in Epithelial Cells,AMPK Signaling,Amyotrophic Lateral Sclerosis Signaling,Angiopoietin Signaling,Antiproliferative Ro…
hsa-miR-199a-3p	miR-199a-3p (and other miRNAs w/seed CAGUAGU)	-1,224	TargetScan Mouse,TargetScan Human	High (predicted),Moderate (predicted)	PIK3CB	PIK3CB	-2,873	14-3-3-mediated Signaling,3-phosphoinositide Biosynthesis,Acetylcholine Receptor Signaling Pathway,Actin Cytoskeleton Signaling,Activin Inhibin Signaling Pathway,Acute Myeloid Leukemia Signaling,Acute Phase Response Signaling,Adrenomedullin signaling pathway,Aldosterone Signaling in Epithelial Cells,AMPK Signaling,Amyotrophic Lateral Sclerosis Signaling,Angiopoietin Signaling,Antiproliferative Ro…
hsa-miR-204-5p	miR-204-5p (and other miRNAs w/seed UCCCUUU)	85,448	TargetScan Mouse,TargetScan Human	High (predicted),Moderate (predicted)	PIK3CB	PIK3CB	-2,873	14-3-3-mediated Signaling,3-phosphoinositide Biosynthesis,Acetylcholine Receptor Signaling Pathway,Actin Cytoskeleton Signaling,Activin Inhibin Signaling Pathway,Acute Myeloid Leukemia Signaling,Acute Phase Response Signaling,Adrenomedullin signaling pathway,Aldosterone Signaling in Epithelial Cells,AMPK Signaling,Amyotrophic Lateral Sclerosis Signaling,Angiopoietin Signaling,Antiproliferative Ro…
hsa-miR-337-3p	miR-337-3p (miRNAs w/seed UCCUAUA)	1,962	TargetScan Human	High (predicted)	PIK3CB	PIK3CB	-2,873	14-3-3-mediated Signaling,3-phosphoinositide Biosynthesis,Acetylcholine Receptor Signaling Pathway,Actin Cytoskeleton Signaling,Activin Inhibin Signaling Pathway,Acute Myeloid Leukemia Signaling,Acute Phase Response Signaling,Adrenomedullin signaling pathway,Aldosterone Signaling in Epithelial Cells,AMPK Signaling,Amyotrophic Lateral Sclerosis Signaling,Angiopoietin Signaling,Antiproliferative Ro…
hsa-miR-92b-3p	miR-92a-3p (and other miRNAs w/seed AUUGCAC)	76,008	TargetScan Mouse,TargetScan Human	High (predicted),Moderate (predicted)	PIK3R3	PIK3R3	-4,098	14-3-3-mediated Signaling,3-phosphoinositide Biosynthesis,Acetylcholine Receptor Signaling Pathway,Actin Cytoskeleton Signaling,Activin Inhibin Signaling Pathway,Acute Myeloid Leukemia Signaling,Acute Phase Response Signaling,Adrenomedullin signaling pathway,Aldosterone Signaling in Epithelial Cells,AMPK Signaling,Amyotrophic Lateral Sclerosis Signaling,Angiopoietin Signaling,Antiproliferative Ro…
hsa-miR-337-3p	miR-337-3p (miRNAs w/seed UCCUAUA)	1,962	TargetScan Human	High (predicted)	PILRB	PILRB	410,472	Immunoregulatory interactions between a Lymphoid and a non-Lymphoid cell
hsa-miR-654-5p	miR-541-3p (and other miRNAs w/seed GGUGGGC)	-12,236	TargetScan Human	High (predicted)	PIP5K1C	PIP5K1C	2,101	3-phosphoinositide Biosynthesis,Actin Cytoskeleton Signaling,Aldosterone Signaling in Epithelial Cells,Clathrin-mediated endocytosis,Clathrin-mediated Endocytosis Signaling,D-myo-inositol (1,4,5)-Trisphosphate Biosynthesis,Orexin Signaling Pathway,Phagosome Formation,PI Metabolism,PIP3 activates AKT signaling,RAC Signaling,Regulation of Actin-based Motility by Rho,RHOA Signaling,RHOGDI Signaling,…
hsa-miR-625-5p	miR-625-5p (and other miRNAs w/seed GGGGGAA)	-8,157	TargetScan Human	High (predicted)	PIP5K1C	PIP5K1C	2,101	3-phosphoinositide Biosynthesis,Actin Cytoskeleton Signaling,Aldosterone Signaling in Epithelial Cells,Clathrin-mediated endocytosis,Clathrin-mediated Endocytosis Signaling,D-myo-inositol (1,4,5)-Trisphosphate Biosynthesis,Orexin Signaling Pathway,Phagosome Formation,PI Metabolism,PIP3 activates AKT signaling,RAC Signaling,Regulation of Actin-based Motility by Rho,RHOA Signaling,RHOGDI Signaling,…
hsa-miR-193a-5p	miR-193a-5p (miRNAs w/seed GGGUCUU)	-24,471	TargetScan Human	High (predicted)	PITPNA	PITPNA	-4,960	Gene and protein expression by JAK-STAT signaling after IL-12 stimulation,Netrin-1 signaling
hsa-miR-431-5p	miR-431-5p (and other miRNAs w/seed GUCUUGC)	-6,118	TargetScan Mouse,TargetScan Human	High (predicted)	PITPNA	PITPNA	-4,960	Gene and protein expression by JAK-STAT signaling after IL-12 stimulation,Netrin-1 signaling
hsa-miR-377-3p	miR-377-3p (miRNAs w/seed UCACACA)	-24,471	TargetScan Mouse,TargetScan Human	High (predicted),Moderate (predicted)	PKIA	PKIA	43,251	cAMP-mediated signaling,Cardiac β-adrenergic Signaling
hsa-miR-323a-5p	miR-323-5p (and other miRNAs w/seed GGUGGUC)	-8,157	TargetScan Human	High (predicted)	PKIG	PKIG	4,349	cAMP-mediated signaling,Cardiac β-adrenergic Signaling
hsa-miR-127-3p	miR-127-3p (miRNAs w/seed CGGAUCC)	50,550	TargetScan Human	High (predicted)	PKN2	PKN2	-6,754	RHO GTPase cycle,RHO GTPases activate PKNs
hsa-miR-155-5p	miR-155-5p (miRNAs w/seed UAAUGCU)	2,493	TarBase,TargetScan Human	Experimentally Observed,Moderate (predicted)	PKN2	PKN2	-6,754	RHO GTPase cycle,RHO GTPases activate PKNs
hsa-miR-625-5p	miR-625-5p (and other miRNAs w/seed GGGGGAA)	-8,157	TargetScan Human	High (predicted)	PKN3	PKN3	-6,812	RHO GTPase cycle,RHO GTPases activate PKNs
hsa-miR-3613-5p	miR-3613-5p (miRNAs w/seed GUUGUAC)	-24,471	TargetScan Human	High (predicted)	PLA2G12A	PLA2G12A	8,279	Antioxidant Action of Vitamin C,Atherosclerosis Signaling,CCR3 Signaling in Eosinophils,Docosahexaenoic Acid (DHA) Signaling,Eicosanoid Signaling,Endothelin-1 Signaling,ERK/MAPK Signaling,Fc Epsilon RI Signaling,Gap Junction Signaling,Glucocorticoid Receptor Signaling,Glutaminergic Receptor Signaling Pathway (Enhanced),Glycerophospholipid biosynthesis,MIF Regulation of Innate Immunity,MIF-mediate…
hsa-miR-485-3p	miR-485-3p (and other miRNAs w/seed UCAUACA)	-12,236	TargetScan Human	High (predicted)	PLA2G4A	PLA2G4A	-3,681	Antioxidant Action of Vitamin C,Arachidonic acid metabolism,Atherosclerosis Signaling,CCR3 Signaling in Eosinophils,Docosahexaenoic Acid (DHA) Signaling,Eicosanoid Signaling,Endothelin-1 Signaling,ERK/MAPK Signaling,Fc Epsilon RI Signaling,Gap Junction Signaling,Glucocorticoid Receptor Signaling,Glutaminergic Receptor Signaling Pathway (Enhanced),Glycerophospholipid biosynthesis,Intra-Golgi and r…
hsa-miR-3613-5p	miR-3613-5p (miRNAs w/seed GUUGUAC)	-24,471	TargetScan Human	High (predicted)	PLAC8	PLAC8	-1057,508	ID1 Signaling Pathway,Neutrophil degranulation,Role of PI3K/AKT Signaling in the Pathogenesis of Influenza
hsa-miR-374a-5p	miR-374b-5p (and other miRNAs w/seed UAUAAUA)	-12,236	TargetScan Human	High (predicted)	PLAC8	PLAC8	-1057,508	ID1 Signaling Pathway,Neutrophil degranulation,Role of PI3K/AKT Signaling in the Pathogenesis of Influenza
hsa-miR-154-5p	miR-154-5p (miRNAs w/seed AGGUUAU)	-8,157	TargetScan Mouse,TargetScan Human	High (predicted),Moderate (predicted)	PLAGL1	PLAGL1	4,019	p53 Signaling,TP53 Regulates Transcription of Cell Cycle Genes
hsa-miR-329-3p	miR-329-3p (and other miRNAs w/seed ACACACC)	-12,236	TargetScan Human	High (predicted)	PLAT	PLAT	83,464	Coagulation System,Dissolution of Fibrin Clot,HMGB1 Signaling,S100 Family Signaling Pathway,Signaling by PDGF
hsa-miR-193b-3p	miR-193a-3p (and other miRNAs w/seed ACUGGCC)	-12,236	TargetScan Mouse,TargetScan Human,miRecords	Experimentally Observed,High (predicted)	PLAU	PLAU	-2,540	Coagulation System,Dissolution of Fibrin Clot,Glioma Invasiveness Signaling,Glucocorticoid Receptor Signaling,Multiple Sclerosis Signaling Pathway,Neutrophil degranulation,Oncostatin M Signaling,Pulmonary Fibrosis Idiopathic Signaling Pathway,RAR Activation,Role of Chondrocytes in Rheumatoid Arthritis Signaling Pathway,Tumor Microenvironment Pathway
hsa-miR-2116-3p	miR-2116-3p (miRNAs w/seed CUCCCAU)	-24,471	TargetScan Human	High (predicted)	PLAUR	PLAUR	192,537	Coagulation System,Dissolution of Fibrin Clot,Glioma Invasiveness Signaling,MSP-RON Signaling in Cancer Cells Pathway,Neutrophil degranulation,Role of Tissue Factor in Cancer,Serotonin Receptor Signaling
hsa-miR-377-3p	miR-377-3p (miRNAs w/seed UCACACA)	-24,471	TargetScan Human	High (predicted)	PLAUR	PLAUR	192,537	Coagulation System,Dissolution of Fibrin Clot,Glioma Invasiveness Signaling,MSP-RON Signaling in Cancer Cells Pathway,Neutrophil degranulation,Role of Tissue Factor in Cancer,Serotonin Receptor Signaling
hsa-miR-654-5p	miR-541-3p (and other miRNAs w/seed GGUGGGC)	-12,236	TargetScan Human	High (predicted)	PLCD3	PLCD3	5,185	14-3-3-mediated Signaling,Acetylcholine Receptor Signaling Pathway,Adrenergic Receptor Signaling Pathway (Enhanced),Adrenomedullin signaling pathway,Aldosterone Signaling in Epithelial Cells,Antioxidant Action of Vitamin C,Apelin Cardiomyocyte Signaling Pathway,Axonal Guidance Signaling,Cardiac Hypertrophy Signaling,Cardiac Hypertrophy Signaling (Enhanced),Cellular Effects of Sildenafil (Viagra),…
hsa-miR-329-3p	miR-329-3p (and other miRNAs w/seed ACACACC)	-12,236	TargetScan Human	High (predicted)	PLEKHA2	PLEKHA2	-4,781	ICOS-ICOSL Signaling in T Helper Cells,PI Metabolism,PI3K Signaling in B Lymphocytes
hsa-miR-377-3p	miR-377-3p (miRNAs w/seed UCACACA)	-24,471	TargetScan Mouse,TargetScan Human	High (predicted),Moderate (predicted)	PLEKHA2	PLEKHA2	-4,781	ICOS-ICOSL Signaling in T Helper Cells,PI Metabolism,PI3K Signaling in B Lymphocytes
hsa-miR-199a-3p	miR-199a-3p (and other miRNAs w/seed CAGUAGU)	-1,224	TargetScan Human	High (predicted)	PLEKHA3	PLEKHA3	-2,560	ICOS-ICOSL Signaling in T Helper Cells,PI Metabolism,PI3K Signaling in B Lymphocytes
hsa-miR-485-5p	miR-485-5p (and other miRNAs w/seed GAGGCUG)	-4,079	TargetScan Mouse,TargetScan Human	High (predicted),Moderate (predicted)	PLEKHO2	PLEKHO2	4,622	Neutrophil degranulation
hsa-miR-3187-3p	miR-3187-3p (miRNAs w/seed UGGCCAU)	-24,471	TargetScan Human	High (predicted)	PLIN2	PLIN2	2,788	Chaperone Mediated Autophagy,Chaperone Mediated Autophagy Signaling Pathway,Late endosomal microautophagy,Lipophagy,Regulation of lipid metabolism by PPARalpha
hsa-miR-485-5p	miR-485-5p (and other miRNAs w/seed GAGGCUG)	-4,079	TargetScan Human	High (predicted)	PLIN3	PLIN3	19,054	Chaperone Mediated Autophagy,Chaperone Mediated Autophagy Signaling Pathway,Intra-Golgi and retrograde Golgi-to-ER traffic,Late endosomal microautophagy,Lipophagy,RHOBTB3 ATPase cycle,Triglyceride metabolism
hsa-miR-432-5p	miR-432 (and other miRNAs w/seed CUUGGAG)	-24,471	TargetScan Human	High (predicted)	PLK3	PLK3	-6,509	Mitotic Roles of Polo-Like Kinase,Regulation of TP53 Activity through Phosphorylation,TP53 Regulates Transcription of Cell Cycle Genes
hsa-miR-214-3p	miR-214-3p (and other miRNAs w/seed CAGCAGG)	-4,894	TargetScan Mouse,TargetScan Human	High (predicted),Moderate (predicted)	PLXNA1	PLXNA1	-2,924	Axonal Guidance Signaling,RHO GTPase cycle,RHOA Signaling,ROBO SLIT Signaling Pathway,Semaphorin interactions,Semaphorin Neuronal Repulsive Signaling Pathway,Semaphorin Signaling in Neurons,WNT/SHH Axonal Guidance Signaling Pathway
hsa-miR-193b-3p	miR-193a-3p (and other miRNAs w/seed ACUGGCC)	-12,236	TargetScan Human	High (predicted)	PMAIP1	PMAIP1	92,439	Intrinsic Pathway for Apoptosis,Molecular Mechanisms of Cancer,MYC Mediated Apoptosis Signaling,p53 Signaling,Pulmonary Fibrosis Idiopathic Signaling Pathway,TP53 Regulates Transcription of Cell Death Genes
hsa-miR-370-3p	miR-370-3p (and other miRNAs w/seed CCUGCUG)	-6,118	TargetScan Human	High (predicted)	PMAIP1	PMAIP1	92,439	Intrinsic Pathway for Apoptosis,Molecular Mechanisms of Cancer,MYC Mediated Apoptosis Signaling,p53 Signaling,Pulmonary Fibrosis Idiopathic Signaling Pathway,TP53 Regulates Transcription of Cell Death Genes
hsa-miR-935	miR-935 (miRNAs w/seed CAGUUAC)	4,781	TargetScan Human	High (predicted)	PMCH	PMCH	254,937	Class A/1 (Rhodopsin-like receptors),G alpha (i) signalling events,G alpha (q) signalling events
hsa-miR-377-3p	miR-377-3p (miRNAs w/seed UCACACA)	-24,471	TargetScan Human	High (predicted)	PNO1	PNO1	-10,835	Major pathway of rRNA processing in the nucleolus and cytosol
hsa-miR-193a-5p	miR-193a-5p (miRNAs w/seed GGGUCUU)	-24,471	TargetScan Human	High (predicted)	PNP	PNP	3,058	Adenine and Adenosine Salvage I,Adenine and Adenosine Salvage III,Adenosine Nucleotides Degradation II,Arsenate Detoxification I (Glutaredoxin),Guanine and Guanosine Salvage I,Guanosine Nucleotides Degradation III,Neutrophil degranulation,Purine Nucleotides Degradation II (Aerobic),Purine Ribonucleosides Degradation to Ribose-1-phosphate,Urate Biosynthesis/Inosine 5'-phosphate Degradation,Xanthin…
hsa-miR-214-3p	miR-214-3p (and other miRNAs w/seed CAGCAGG)	-4,894	TargetScan Human	High (predicted)	PNPLA2	PNPLA2	5,183	Activin Inhibin Signaling Pathway,Antioxidant Action of Vitamin C,Atherosclerosis Signaling,Cachexia Signaling Pathway,Docosahexaenoic Acid (DHA) Signaling,Eicosanoid Signaling,Endothelin-1 Signaling,Glutaminergic Receptor Signaling Pathway (Enhanced),Glycerophospholipid biosynthesis,NAFLD Signaling Pathway,Neurovascular Coupling Signaling Pathway,Neutrophil Extracellular Trap Signaling Pathway,O…
hsa-miR-377-3p	miR-377-3p (miRNAs w/seed UCACACA)	-24,471	TargetScan Mouse,TargetScan Human	High (predicted),Moderate (predicted)	PNPLA2	PNPLA2	5,183	Activin Inhibin Signaling Pathway,Antioxidant Action of Vitamin C,Atherosclerosis Signaling,Cachexia Signaling Pathway,Docosahexaenoic Acid (DHA) Signaling,Eicosanoid Signaling,Endothelin-1 Signaling,Glutaminergic Receptor Signaling Pathway (Enhanced),Glycerophospholipid biosynthesis,NAFLD Signaling Pathway,Neurovascular Coupling Signaling Pathway,Neutrophil Extracellular Trap Signaling Pathway,O…
hsa-miR-370-3p	miR-370-3p (and other miRNAs w/seed CCUGCUG)	-6,118	TargetScan Mouse,TargetScan Human	High (predicted),Moderate (predicted)	POLD4	POLD4	15,839	DNA Damage Bypass,HDR through Homologous Recombination (HRR) or Single Strand Annealing (SSA),Mismatch Repair,NER (Nucleotide Excision Repair, Enhanced Pathway),Nucleotide Excision Repair,Resolution of Abasic Sites (AP sites),Synthesis of DNA,Telomere Maintenance
hsa-miR-3187-3p	miR-3187-3p (miRNAs w/seed UGGCCAU)	-24,471	TargetScan Human	High (predicted)	POTEF	POTEE/POTEF	-696,720	RHO GTPase cycle
hsa-miR-485-5p	miR-485-5p (and other miRNAs w/seed GAGGCUG)	-4,079	TargetScan Human	High (predicted)	PPARA	PPARA	91,251	Activation of gene expression by SREBF (SREBP),BMAL1:CLOCK,NPAS2 activates circadian gene expression,Circadian Clock,CLEAR Signaling Pathway,Cytoprotection by HMOX1,FXR/RXR Activation,Generic Transcription Pathway,Heme signaling,Hepatic Cholestasis,LPS/IL-1 Mediated Inhibition of RXR Function,Mitochondrial biogenesis,NAFLD Signaling Pathway,Oxytocin Signaling Pathway,PPAR Signaling,PPARα/RXRα Act…
hsa-miR-376a-3p	miR-376a-3p (and other miRNAs w/seed UCAUAGA)	-4,894	TargetScan Human	High (predicted)	PPID	PPID	-4,133	ESR-mediated signaling,Necroptosis Signaling Pathway,Neutrophil Extracellular Trap Signaling Pathway,Sirtuin Signaling Pathway
hsa-miR-376a-3p	miR-376a-3p (and other miRNAs w/seed UCAUAGA)	-4,894	TargetScan Human	High (predicted)	PPIL3	PPIL3	-9,850	Processing of Capped Intron-Containing Pre-mRNA
hsa-miR-379-3p	miR-411-3p (and other miRNAs w/seed AUGUAAC)	-2,039	TargetScan Human	High (predicted)	PPIL3	PPIL3	-9,850	Processing of Capped Intron-Containing Pre-mRNA
hsa-miR-485-5p	miR-485-5p (and other miRNAs w/seed GAGGCUG)	-4,079	TargetScan Human	High (predicted)	PPIL3	PPIL3	-9,850	Processing of Capped Intron-Containing Pre-mRNA
hsa-let-7a-2-3p	let-7a-2-3p (and other miRNAs w/seed UGUACAG)	2,248	TargetScan Human	High (predicted)	PPP1CC	PPP1CC	-5,520	3-phosphoinositide Biosynthesis,3-phosphoinositide Degradation,ATM Signaling,Breast Cancer Regulation by Stathmin1,Cardiac β-adrenergic Signaling,CDK5 Signaling,Cell Cycle Checkpoints,Circadian Clock,D-myo-inositol (1,4,5,6)-Tetrakisphosphate Biosynthesis,D-myo-inositol (3,4,5,6)-tetrakisphosphate Biosynthesis,D-myo-inositol-5-phosphate Metabolism,Dopamine Receptor Signaling,Dopamine-DARPP32 Feed…
hsa-miR-181a-2-3p	miR-181a-2-3p (and other miRNAs w/seed CCACUGA)	-24,471	TargetScan Mouse,TargetScan Human	High (predicted),Moderate (predicted)	PPP1R10	PPP1R10	-3,345	3-phosphoinositide Biosynthesis,3-phosphoinositide Degradation,Breast Cancer Regulation by Stathmin1,Cardiac β-adrenergic Signaling,CDK5 Signaling,D-myo-inositol (1,4,5,6)-Tetrakisphosphate Biosynthesis,D-myo-inositol (3,4,5,6)-tetrakisphosphate Biosynthesis,D-myo-inositol-5-phosphate Metabolism,Dopamine Receptor Signaling,Dopamine-DARPP32 Feedback in cAMP Signaling,ERK/MAPK Signaling,HIPPO signa…
hsa-miR-323a-5p	miR-323-5p (and other miRNAs w/seed GGUGGUC)	-8,157	TargetScan Mouse,TargetScan Human	High (predicted),Moderate (predicted)	PPP1R12A	PPP1R12A	-4,854	3-phosphoinositide Biosynthesis,3-phosphoinositide Degradation,Actin Cytoskeleton Signaling,Actin Nucleation by ARP-WASP Complex,Breast Cancer Regulation by Stathmin1,Cardiac β-adrenergic Signaling,CCR3 Signaling in Eosinophils,CDC42 Signaling,CDK5 Signaling,Cellular Effects of Sildenafil (Viagra),Chemokine Signaling,D-myo-inositol (1,4,5,6)-Tetrakisphosphate Biosynthesis,D-myo-inositol (3,4,5,6)…
hsa-miR-214-3p	miR-214-3p (and other miRNAs w/seed CAGCAGG)	-4,894	TargetScan Human	High (predicted)	PPP1R3D	PPP1R3D	13,747	3-phosphoinositide Biosynthesis,3-phosphoinositide Degradation,Breast Cancer Regulation by Stathmin1,Cardiac β-adrenergic Signaling,CDK5 Signaling,D-myo-inositol (1,4,5,6)-Tetrakisphosphate Biosynthesis,D-myo-inositol (3,4,5,6)-tetrakisphosphate Biosynthesis,D-myo-inositol-5-phosphate Metabolism,Dopamine Receptor Signaling,Dopamine-DARPP32 Feedback in cAMP Signaling,ERK/MAPK Signaling,HIPPO signa…
hsa-miR-199a-3p	miR-199a-3p (and other miRNAs w/seed CAGUAGU)	-1,224	TargetScan Mouse,TargetScan Human	High (predicted)	PPP2R2A	PPP2R2A	-2,069	3-phosphoinositide Biosynthesis,3-phosphoinositide Degradation,AMPK Signaling,ATM Signaling,Autophagy,BEX2 Signaling Pathway,Breast Cancer Regulation by Stathmin1,Cardiac β-adrenergic Signaling,CDK5 Signaling,Cell Cycle Regulation by BTG Family Proteins,Ceramide Signaling,CLEAR Signaling Pathway,CTLA4 Signaling in Cytotoxic T Lymphocytes,Cyclins and Cell Cycle Regulation,D-myo-inositol (1,4,5,6)-…
hsa-miR-501-5p	miR-501-5p (miRNAs w/seed AUCCUUU)	-24,471	TargetScan Human	High (predicted)	PPP2R3A	PPP2R3A	-3,861	3-phosphoinositide Biosynthesis,3-phosphoinositide Degradation,AMPK Signaling,ATM Signaling,Autophagy,BEX2 Signaling Pathway,Breast Cancer Regulation by Stathmin1,Cardiac β-adrenergic Signaling,CDK5 Signaling,Cell Cycle Regulation by BTG Family Proteins,Ceramide Signaling,CLEAR Signaling Pathway,CTLA4 Signaling in Cytotoxic T Lymphocytes,Cyclins and Cell Cycle Regulation,D-myo-inositol (1,4,5,6)-…
hsa-miR-193b-3p	miR-193a-3p (and other miRNAs w/seed ACUGGCC)	-12,236	TargetScan Human	High (predicted)	PPP2R5C	PPP2R5C	-3,698	3-phosphoinositide Biosynthesis,3-phosphoinositide Degradation,AMPK Signaling,ATM Signaling,Autophagy,BEX2 Signaling Pathway,Breast Cancer Regulation by Stathmin1,Cardiac β-adrenergic Signaling,CDK5 Signaling,Cell Cycle Checkpoints,Cell Cycle Regulation by BTG Family Proteins,Ceramide Signaling,CLEAR Signaling Pathway,Costimulation by the CD28 family,CTLA4 Signaling in Cytotoxic T Lymphocytes,Cyc…
hsa-miR-1180-3p	miR-1180-3p (miRNAs w/seed UUCCGGC)	-2,225	TargetScan Human	High (predicted)	PPP2R5E	PPP2R5E	-3,404	3-phosphoinositide Biosynthesis,3-phosphoinositide Degradation,AMPK Signaling,ATM Signaling,Autophagy,BEX2 Signaling Pathway,Breast Cancer Regulation by Stathmin1,Cardiac β-adrenergic Signaling,CDK5 Signaling,Cell Cycle Checkpoints,Cell Cycle Regulation by BTG Family Proteins,Ceramide Signaling,CLEAR Signaling Pathway,Costimulation by the CD28 family,CTLA4 Signaling in Cytotoxic T Lymphocytes,Cyc…
hsa-miR-199a-3p	miR-199a-3p (and other miRNAs w/seed CAGUAGU)	-1,224	TargetScan Mouse,TargetScan Human	High (predicted)	PPP2R5E	PPP2R5E	-3,404	3-phosphoinositide Biosynthesis,3-phosphoinositide Degradation,AMPK Signaling,ATM Signaling,Autophagy,BEX2 Signaling Pathway,Breast Cancer Regulation by Stathmin1,Cardiac β-adrenergic Signaling,CDK5 Signaling,Cell Cycle Checkpoints,Cell Cycle Regulation by BTG Family Proteins,Ceramide Signaling,CLEAR Signaling Pathway,Costimulation by the CD28 family,CTLA4 Signaling in Cytotoxic T Lymphocytes,Cyc…
hsa-miR-99a-5p	miR-100-5p (and other miRNAs w/seed ACCCGUA)	7,437	TargetScan Mouse,TargetScan Human	High (predicted),Moderate (predicted)	PPP3CA	PPP3CA	-10,105	3-phosphoinositide Biosynthesis,3-phosphoinositide Degradation,ABRA Signaling Pathway,Amyotrophic Lateral Sclerosis Signaling,Autophagy,Axonal Guidance Signaling,B Cell Receptor Signaling,Beta-catenin independent WNT signaling,C-type lectin receptors (CLRs),Calcium Signaling,Calcium-induced T Lymphocyte Apoptosis,cAMP-mediated signaling,Cardiac Hypertrophy Signaling,Cardiac Hypertrophy Signaling …
hsa-miR-149-5p	miR-149-5p (miRNAs w/seed CUGGCUC)	16,673	TargetScan Human	High (predicted)	PRDX6	PRDX6	-2,903	Antioxidant Action of Vitamin C,Apelin Adipocyte Signaling Pathway,Atherosclerosis Signaling,Detoxification of Reactive Oxygen Species,Docosahexaenoic Acid (DHA) Signaling,Eicosanoid Signaling,Endothelin-1 Signaling,Glutaminergic Receptor Signaling Pathway (Enhanced),Glutathione Redox Reactions I,Heparan Sulfate Biosynthesis,Heparan Sulfate Biosynthesis (Late Stages),Mitochondrial Dysfunction,Neu…
hsa-miR-590-3p	miR-590-3p (miRNAs w/seed AAUUUUA)	-24,471	TargetScan Mouse,TargetScan Human	High (predicted),Moderate (predicted)	PREX2	PREX2	-10,726	G-Protein Coupled Receptor Signaling,PTEN Regulation,PTEN Signaling,RHO GTPase cycle
hsa-miR-485-5p	miR-485-5p (and other miRNAs w/seed GAGGCUG)	-4,079	TargetScan Human	High (predicted)	PRIM2	PRIM2	-8,736	Activation of the pre-replicative complex,Cell Cycle Control of Chromosomal Replication,Mitotic G1 phase and G1/S transition,NER (Nucleotide Excision Repair, Enhanced Pathway),Synthesis of DNA,Telomere Maintenance
hsa-miR-625-5p	miR-625-5p (and other miRNAs w/seed GGGGGAA)	-8,157	TargetScan Mouse,TargetScan Human	High (predicted),Moderate (predicted)	PRIM2	PRIM2	-8,736	Activation of the pre-replicative complex,Cell Cycle Control of Chromosomal Replication,Mitotic G1 phase and G1/S transition,NER (Nucleotide Excision Repair, Enhanced Pathway),Synthesis of DNA,Telomere Maintenance
hsa-miR-625-5p	miR-625-5p (and other miRNAs w/seed GGGGGAA)	-8,157	TargetScan Human	High (predicted)	PRKAA1	PRKAA1	-2,686	Activation of NMDA receptors and postsynaptic events,AMPK Signaling,Apelin Adipocyte Signaling Pathway,Apelin Cardiac Fibroblast Signaling Pathway,Apelin Endothelial Signaling Pathway,Apelin Muscle Signaling Pathway,Apelin Pancreas Signaling Pathway,Autophagy,Cachexia Signaling Pathway,Chaperone Mediated Autophagy Signaling Pathway,Chronic Myeloid Leukemia Signaling,Circadian Rhythm Signaling,CLE…
hsa-miR-204-5p	miR-204-5p (and other miRNAs w/seed UCCCUUU)	85,448	TargetScan Human	High (predicted)	PRKAB2	PRKAB2	3,825	Activation of NMDA receptors and postsynaptic events,AMPK Signaling,Apelin Adipocyte Signaling Pathway,Apelin Cardiac Fibroblast Signaling Pathway,Apelin Endothelial Signaling Pathway,Apelin Muscle Signaling Pathway,Apelin Pancreas Signaling Pathway,Autophagy,Cachexia Signaling Pathway,Carnitine metabolism,Chaperone Mediated Autophagy Signaling Pathway,Chronic Myeloid Leukemia Signaling,Circadian…
hsa-miR-455-3p	miR-455-3p (miRNAs w/seed CAGUCCA)	-3,496	TargetScan Mouse,TargetScan Human	High (predicted),Moderate (predicted)	PRKAB2	PRKAB2	3,825	Activation of NMDA receptors and postsynaptic events,AMPK Signaling,Apelin Adipocyte Signaling Pathway,Apelin Cardiac Fibroblast Signaling Pathway,Apelin Endothelial Signaling Pathway,Apelin Muscle Signaling Pathway,Apelin Pancreas Signaling Pathway,Autophagy,Cachexia Signaling Pathway,Carnitine metabolism,Chaperone Mediated Autophagy Signaling Pathway,Chronic Myeloid Leukemia Signaling,Circadian…
hsa-miR-376a-3p	miR-376a-3p (and other miRNAs w/seed UCAUAGA)	-4,894	TargetScan Human	High (predicted)	PRKACB	PRKACB	-5,403	Acetylcholine Receptor Signaling Pathway,Activation of NMDA receptors and postsynaptic events,Adrenergic Receptor Signaling Pathway (Enhanced),Adrenomedullin signaling pathway,AMPK Signaling,Amyloid Processing,Androgen Signaling,Apelin Adipocyte Signaling Pathway,Apelin Pancreas Signaling Pathway,Autism Signaling Pathway,Autophagy,Axonal Guidance Signaling,BBSome Signaling Pathway,BMP signaling p…
hsa-miR-496	miR-503-3p (and other miRNAs w/seed GAGUAUU)	-8,157	TargetScan Human	High (predicted)	PRKACB	PRKACB	-5,403	Acetylcholine Receptor Signaling Pathway,Activation of NMDA receptors and postsynaptic events,Adrenergic Receptor Signaling Pathway (Enhanced),Adrenomedullin signaling pathway,AMPK Signaling,Amyloid Processing,Androgen Signaling,Apelin Adipocyte Signaling Pathway,Apelin Pancreas Signaling Pathway,Autism Signaling Pathway,Autophagy,Axonal Guidance Signaling,BBSome Signaling Pathway,BMP signaling p…
hsa-miR-654-5p	miR-541-3p (and other miRNAs w/seed GGUGGGC)	-12,236	TargetScan Human	High (predicted)	PRKAR2A	PRKAR2A	2,257	Acetylcholine Receptor Signaling Pathway,Activation of NMDA receptors and postsynaptic events,Adrenergic Receptor Signaling Pathway (Enhanced),Adrenomedullin signaling pathway,AMPK Signaling,Amyloid Processing,Androgen Signaling,Apelin Adipocyte Signaling Pathway,Apelin Pancreas Signaling Pathway,Autism Signaling Pathway,Autophagy,Axonal Guidance Signaling,BBSome Signaling Pathway,BMP signaling p…
hsa-miR-455-3p	miR-455-3p (miRNAs w/seed CAGUCCA)	-3,496	TargetScan Human	High (predicted)	PRKD3	PRKD3	-2,904	14-3-3-mediated Signaling,Acetylcholine Receptor Signaling Pathway,Adrenergic Receptor Signaling Pathway (Enhanced),Aldosterone Signaling in Epithelial Cells,Androgen Signaling,Apelin Cardiomyocyte Signaling Pathway,Apelin Endothelial Signaling Pathway,Axonal Guidance Signaling,Breast Cancer Regulation by Stathmin1,Cachexia Signaling Pathway,Calcium-induced T Lymphocyte Apoptosis,Cardiac Hypertro…
hsa-miR-377-3p	miR-377-3p (miRNAs w/seed UCACACA)	-24,471	TargetScan Mouse,TargetScan Human	High (predicted),Moderate (predicted)	PRKX	PRKX	16,231	Activation of NMDA receptors and postsynaptic events,DAG and IP3 signaling,Opioid Signalling,Pyridoxal 5'-phosphate Salvage Pathway,Salvage Pathways of Pyrimidine Ribonucleotides
hsa-miR-130b-5p	miR-130b-5p (and other miRNAs w/seed CUCUUUC)	-1,165	TargetScan Human	High (predicted)	PRPF38A	PRPF38A	-2,321	Processing of Capped Intron-Containing Pre-mRNA,Systemic Lupus Erythematosus Signaling
hsa-miR-370-3p	miR-370-3p (and other miRNAs w/seed CCUGCUG)	-6,118	TargetScan Human	High (predicted)	PRPF38A	PRPF38A	-2,321	Processing of Capped Intron-Containing Pre-mRNA,Systemic Lupus Erythematosus Signaling
hsa-miR-625-5p	miR-625-5p (and other miRNAs w/seed GGGGGAA)	-8,157	TargetScan Mouse,TargetScan Human	High (predicted),Moderate (predicted)	PSAP	PSAP	21,055	Class A/1 (Rhodopsin-like receptors),CLEAR Signaling Pathway,G alpha (i) signalling events,Lipid Antigen Presentation by CD1,Neutrophil degranulation,Response to elevated platelet cytosolic Ca2+,Sphingolipid metabolism
hsa-miR-501-5p	miR-501-5p (miRNAs w/seed AUCCUUU)	-24,471	TargetScan Human	High (predicted)	PSMA4	PSMA4	-2,494	ABC-family proteins mediated transport,BAG2 Signaling Pathway,C-type lectin receptors (CLRs),Cachexia Signaling Pathway,Cell Cycle Checkpoints,Cellular response to hypoxia,Chaperone Mediated Autophagy Signaling Pathway,Class I MHC mediated antigen processing and presentation,Degradation of beta-catenin by the destruction complex,Deubiquitination,DNA Replication Pre-Initiation,FAT10 Signaling Path…
hsa-miR-625-5p	miR-625-5p (and other miRNAs w/seed GGGGGAA)	-8,157	TargetScan Human	High (predicted)	PSMB8	PSMB8	28,120	ABC-family proteins mediated transport,Antigen Presentation Pathway,BAG2 Signaling Pathway,C-type lectin receptors (CLRs),Cachexia Signaling Pathway,Cell Cycle Checkpoints,Cellular response to hypoxia,Chaperone Mediated Autophagy Signaling Pathway,Class I MHC mediated antigen processing and presentation,Degradation of beta-catenin by the destruction complex,Deubiquitination,DNA Replication Pre-In…
hsa-miR-487a-5p	miR-487a-5p (and other miRNAs w/seed UGGUUAU)	-8,157	TargetScan Human	High (predicted)	PSMC2	PSMC2	-2,380	ABC-family proteins mediated transport,BAG2 Signaling Pathway,C-type lectin receptors (CLRs),Cachexia Signaling Pathway,Cell Cycle Checkpoints,Cellular response to hypoxia,Class I MHC mediated antigen processing and presentation,Degradation of beta-catenin by the destruction complex,Deubiquitination,DNA Replication Pre-Initiation,FAT10 Signaling Pathway,Fc epsilon receptor (FCERI) signaling,Hedge…
hsa-miR-495-3p	miR-495-3p (and other miRNAs w/seed AACAAAC)	-12,236	TargetScan Human	High (predicted)	PSMC6	PSMC6	-3,260	ABC-family proteins mediated transport,BAG2 Signaling Pathway,C-type lectin receptors (CLRs),Cachexia Signaling Pathway,Cell Cycle Checkpoints,Cellular response to hypoxia,Class I MHC mediated antigen processing and presentation,Degradation of beta-catenin by the destruction complex,Deubiquitination,DNA Replication Pre-Initiation,FAT10 Signaling Pathway,Fc epsilon receptor (FCERI) signaling,Hedge…
hsa-miR-654-5p	miR-541-3p (and other miRNAs w/seed GGUGGGC)	-12,236	TargetScan Human	High (predicted)	PSMD9	PSMD9	3,465	ABC-family proteins mediated transport,BAG2 Signaling Pathway,C-type lectin receptors (CLRs),Cachexia Signaling Pathway,Cell Cycle Checkpoints,Cellular response to hypoxia,Class I MHC mediated antigen processing and presentation,Degradation of beta-catenin by the destruction complex,Deubiquitination,DNA Replication Pre-Initiation,FAT10 Signaling Pathway,Fc epsilon receptor (FCERI) signaling,Hedge…
hsa-miR-454-3p	miR-130a-3p (and other miRNAs w/seed AGUGCAA)	-24,471	Ingenuity Expert Findings,TargetScan Human	Experimentally Observed,High (predicted)	PTEN	PTEN	-5,467	3-phosphoinositide Biosynthesis,3-phosphoinositide Degradation,Autism Signaling Pathway,Autophagy,B Cell Receptor Signaling,BEX2 Signaling Pathway,Cachexia Signaling Pathway,Cancer Drug Resistance by Drug Efflux,Cardiac Hypertrophy Signaling (Enhanced),CDX Gastrointestinal Cancer Signaling Pathway,Chronic Myeloid Leukemia Signaling,CSDE1 Signaling Pathway,D-myo-inositol (1,3,4)-trisphosphate Bios…
hsa-miR-214-3p	miR-214-3p (and other miRNAs w/seed CAGCAGG)	-4,894	Ingenuity Expert Findings,TarBase,TargetScan Human,miRecords	Experimentally Observed,Moderate (predicted)	PTEN	PTEN	-5,467	3-phosphoinositide Biosynthesis,3-phosphoinositide Degradation,Autism Signaling Pathway,Autophagy,B Cell Receptor Signaling,BEX2 Signaling Pathway,Cachexia Signaling Pathway,Cancer Drug Resistance by Drug Efflux,Cardiac Hypertrophy Signaling (Enhanced),CDX Gastrointestinal Cancer Signaling Pathway,Chronic Myeloid Leukemia Signaling,CSDE1 Signaling Pathway,D-myo-inositol (1,3,4)-trisphosphate Bios…
hsa-miR-92b-3p	miR-92a-3p (and other miRNAs w/seed AUUGCAC)	76,008	Ingenuity Expert Findings,TargetScan Human	Experimentally Observed,Moderate (predicted)	PTEN	PTEN	-5,467	3-phosphoinositide Biosynthesis,3-phosphoinositide Degradation,Autism Signaling Pathway,Autophagy,B Cell Receptor Signaling,BEX2 Signaling Pathway,Cachexia Signaling Pathway,Cancer Drug Resistance by Drug Efflux,Cardiac Hypertrophy Signaling (Enhanced),CDX Gastrointestinal Cancer Signaling Pathway,Chronic Myeloid Leukemia Signaling,CSDE1 Signaling Pathway,D-myo-inositol (1,3,4)-trisphosphate Bios…
hsa-miR-181a-2-3p	miR-181a-2-3p (and other miRNAs w/seed CCACUGA)	-24,471	TargetScan Human	High (predicted)	PTGES2	PTGES2	2,468	Coronavirus Pathogenesis Pathway,Eicosanoid Signaling,Neutrophil degranulation,Prostanoid Biosynthesis,Synthesis of Prostaglandins (PG) and Thromboxanes (TX)
hsa-miR-376c-3p	miR-376c-3p (and other miRNAs w/seed ACAUAGA)	-4,079	TargetScan Human	High (predicted)	PTGES3	PTGES3	-2,624	Aryl Hydrocarbon Receptor Signaling,Aryl hydrocarbon receptor signalling,Cellular response to heat stress,ESR-mediated signaling,Glucocorticoid Receptor Signaling,HSP90 chaperone cycle for steroid hormone receptors in the presence of ligand,MicroRNA Biogenesis Signaling Pathway,Prostanoid Biosynthesis,Synthesis of Prostaglandins (PG) and Thromboxanes (TX),Telomerase Signaling,Xenobiotic Metabolis…
hsa-miR-379-5p	miR-379-5p (and other miRNAs w/seed GGUAGAC)	-2,225	TargetScan Human	High (predicted)	PTK2	PTK2	-2,606	Actin Cytoskeleton Signaling,Adrenomedullin signaling pathway,Agrin Interactions at Neuromuscular Junction,Angiopoietin Signaling,Apoptotic execution phase,Axonal Guidance Signaling,B Cell Receptor Signaling,Cardiac Hypertrophy Signaling (Enhanced),Chemokine Signaling,Cholecystokinin/Gastrin-mediated Signaling,CXCR4 Signaling,Endocannabinoid Cancer Inhibition Pathway,EPH-Ephrin signaling,Ephrin A…
hsa-miR-214-3p	miR-214-3p (and other miRNAs w/seed CAGCAGG)	-4,894	TargetScan Human	High (predicted)	PTPN18	PTPN18	18,087	Interleukin-1 family signaling,Protein Kinase A Signaling,Signaling by ERBB2
hsa-miR-323a-5p	miR-323-5p (and other miRNAs w/seed GGUGGUC)	-8,157	TargetScan Human	High (predicted)	PTPN18	PTPN18	18,087	Interleukin-1 family signaling,Protein Kinase A Signaling,Signaling by ERBB2
hsa-miR-193b-3p	miR-193a-3p (and other miRNAs w/seed ACUGGCC)	-12,236	TargetScan Human	High (predicted)	PTPN9	PTPN9	-2,397	Interleukin-1 family signaling,Protein Kinase A Signaling
hsa-miR-197-3p	miR-197-3p (and other miRNAs w/seed UCACCAC)	-2,039	TargetScan Mouse,TargetScan Human	High (predicted)	PTPN9	PTPN9	-2,397	Interleukin-1 family signaling,Protein Kinase A Signaling
hsa-miR-130b-5p	miR-130b-5p (and other miRNAs w/seed CUCUUUC)	-1,165	TargetScan Human	High (predicted)	PTX3	PTX3	1482,778	Neutrophil degranulation,Role of Pattern Recognition Receptors in Recognition of Bacteria and Viruses
hsa-miR-193a-5p	miR-193a-5p (miRNAs w/seed GGGUCUU)	-24,471	TargetScan Human	High (predicted)	PVR	PVR	191,583	Cell junction organization,Immunoregulatory interactions between a Lymphoid and a non-Lymphoid cell,Natural Killer Cell Signaling
hsa-miR-654-5p	miR-541-3p (and other miRNAs w/seed GGUGGGC)	-12,236	TargetScan Human	High (predicted)	PYGB	PYGB	4,829	Glycogen Degradation II,Glycogen Degradation III,Glycogen metabolism,Neutrophil degranulation,Protein Kinase A Signaling,α-Adrenergic Signaling
hsa-miR-454-3p	miR-130a-3p (and other miRNAs w/seed AGUGCAA)	-24,471	TargetScan Human	High (predicted)	QKI	QKI	-3,484	MicroRNA Biogenesis Signaling Pathway
hsa-miR-199a-3p	miR-199a-3p (and other miRNAs w/seed CAGUAGU)	-1,224	TargetScan Human	High (predicted)	QKI	QKI	-3,484	MicroRNA Biogenesis Signaling Pathway
hsa-miR-496	miR-503-3p (and other miRNAs w/seed GAGUAUU)	-8,157	TargetScan Human	High (predicted)	QKI	QKI	-3,484	MicroRNA Biogenesis Signaling Pathway
hsa-miR-590-3p	miR-590-3p (miRNAs w/seed AAUUUUA)	-24,471	TargetScan Human	High (predicted)	QKI	QKI	-3,484	MicroRNA Biogenesis Signaling Pathway
hsa-miR-625-5p	miR-625-5p (and other miRNAs w/seed GGGGGAA)	-8,157	TargetScan Human	High (predicted)	QKI	QKI	-3,484	MicroRNA Biogenesis Signaling Pathway
hsa-miR-3152-5p	miR-3152-5p (miRNAs w/seed UUGCCUC)	-24,471	TargetScan Human	High (predicted)	QPCT	QPCT	15,401	Neutrophil degranulation
hsa-miR-204-5p	miR-204-5p (and other miRNAs w/seed UCCCUUU)	85,448	TargetScan Human	High (predicted)	RAB13	RAB13	6,451	RAB GEFs exchange GTP for GDP on RABs,RAB geranylgeranylation,Tight Junction Signaling,Translocation of SLC2A4 (GLUT4) to the plasma membrane
hsa-miR-3130-5p	miR-3130-5p (and other miRNAs w/seed ACCCAGU)	-24,471	TargetScan Human	High (predicted)	RAB14	RAB14	-4,841	Neutrophil degranulation,PI Metabolism,RAB GEFs exchange GTP for GDP on RABs,RAB geranylgeranylation,Translocation of SLC2A4 (GLUT4) to the plasma membrane
hsa-miR-193b-3p	miR-193a-3p (and other miRNAs w/seed ACUGGCC)	-12,236	TargetScan Human	High (predicted)	RAB27B	RAB27B	-10,424	RAB GEFs exchange GTP for GDP on RABs,RAB geranylgeranylation,Response to elevated platelet cytosolic Ca2+
hsa-miR-485-5p	miR-485-5p (and other miRNAs w/seed GAGGCUG)	-4,079	TargetScan Human	High (predicted)	RAB3D	RAB3D	12,885	Neutrophil degranulation,RAB geranylgeranylation
hsa-miR-149-5p	miR-149-5p (miRNAs w/seed CUGGCUC)	16,673	TargetScan Mouse,TargetScan Human	High (predicted)	RAB3IL1	RAB3IL1	5,969	RAB GEFs exchange GTP for GDP on RABs
hsa-miR-625-5p	miR-625-5p (and other miRNAs w/seed GGGGGAA)	-8,157	TargetScan Human	High (predicted)	RAB3IL1	RAB3IL1	5,969	RAB GEFs exchange GTP for GDP on RABs
hsa-miR-625-5p	miR-625-5p (and other miRNAs w/seed GGGGGAA)	-8,157	TargetScan Mouse,TargetScan Human	High (predicted),Moderate (predicted)	RAB5B	RAB5B	1,834	Amyotrophic Lateral Sclerosis Signaling,BBSome Signaling Pathway,Caveolar-mediated Endocytosis Signaling,Clathrin-mediated endocytosis,Clathrin-mediated Endocytosis Signaling,Neutrophil degranulation,Phagosome Maturation,RAB GEFs exchange GTP for GDP on RABs,RAB geranylgeranylation,Remodeling of Epithelial Adherens Junctions,Synaptogenesis Signaling Pathway,TBC/RABGAPs
hsa-let-7a-2-3p	let-7a-2-3p (and other miRNAs w/seed UGUACAG)	2,248	TargetScan Mouse,TargetScan Human	High (predicted)	RAB5C	RAB5C	-2,974	Amyotrophic Lateral Sclerosis Signaling,BBSome Signaling Pathway,Caveolar-mediated Endocytosis Signaling,Clathrin-mediated endocytosis,Clathrin-mediated Endocytosis Signaling,Neutrophil degranulation,Phagosome Maturation,RAB GEFs exchange GTP for GDP on RABs,RAB geranylgeranylation,Remodeling of Epithelial Adherens Junctions,Synaptogenesis Signaling Pathway,TBC/RABGAPs,trans-Golgi Network Vesicle…
hsa-miR-155-5p	miR-155-5p (miRNAs w/seed UAAUGCU)	2,493	TarBase,TargetScan Human	Experimentally Observed,Moderate (predicted)	RAB5C	RAB5C	-2,974	Amyotrophic Lateral Sclerosis Signaling,BBSome Signaling Pathway,Caveolar-mediated Endocytosis Signaling,Clathrin-mediated endocytosis,Clathrin-mediated Endocytosis Signaling,Neutrophil degranulation,Phagosome Maturation,RAB GEFs exchange GTP for GDP on RABs,RAB geranylgeranylation,Remodeling of Epithelial Adherens Junctions,Synaptogenesis Signaling Pathway,TBC/RABGAPs,trans-Golgi Network Vesicle…
hsa-miR-485-5p	miR-485-5p (and other miRNAs w/seed GAGGCUG)	-4,079	TargetScan Mouse,TargetScan Human	High (predicted)	RAB8B	RAB8B	-2,011	Germ Cell-Sertoli Cell Junction Signaling,RAB GEFs exchange GTP for GDP on RABs,RAB geranylgeranylation,Sertoli Cell-Sertoli Cell Junction Signaling,TBC/RABGAPs
hsa-let-7a-2-3p	let-7a-2-3p (and other miRNAs w/seed UGUACAG)	2,248	TargetScan Mouse,TargetScan Human	High (predicted),Moderate (predicted)	RAC1	RAC1	-2,048	Actin Cytoskeleton Signaling,Actin Nucleation by ARP-WASP Complex,Activation of NMDA receptors and postsynaptic events,Agrin Interactions at Neuromuscular Junction,Amyotrophic Lateral Sclerosis Signaling,Apelin Adipocyte Signaling Pathway,Axonal Guidance Signaling,B Cell Receptor Signaling,Beta-catenin independent WNT signaling,Breast Cancer Regulation by Stathmin1,Cardiac Hypertrophy Signaling,C…
hsa-miR-92b-3p	miR-92a-3p (and other miRNAs w/seed AUUGCAC)	76,008	TargetScan Mouse,TargetScan Human	High (predicted),Moderate (predicted)	RAD21	RAD21	-3,186	ESR-mediated signaling,Kinetochore Metaphase Signaling Pathway,Meiotic synapsis,Mitotic Metaphase and Anaphase,Mitotic Prometaphase,Mitotic Roles of Polo-Like Kinase,Mitotic Telophase/Cytokinesis,S Phase,SUMOylation of DNA damage response and repair proteins
hsa-miR-654-5p	miR-541-3p (and other miRNAs w/seed GGUGGGC)	-12,236	TargetScan Human	High (predicted)	RAMP2	RAMP2	-5,652	Adrenomedullin signaling pathway,Class B/2 (Secretin family receptors),G alpha (s) signalling events
hsa-miR-181a-2-3p	miR-181a-2-3p (and other miRNAs w/seed CCACUGA)	-24,471	TargetScan Human	High (predicted)	RAN	RAN	-2,537	Chronic Myeloid Leukemia Signaling,Gene Silencing by RNA,HIF1α Signaling,MicroRNA Biogenesis Signaling Pathway,Mitotic Metaphase and Anaphase,RAN Signaling,Regulation of cholesterol biosynthesis by SREBP (SREBF),Sumoylation Pathway
hsa-miR-197-3p	miR-197-3p (and other miRNAs w/seed UCACCAC)	-2,039	TargetScan Human	High (predicted)	RAN	RAN	-2,537	Chronic Myeloid Leukemia Signaling,Gene Silencing by RNA,HIF1α Signaling,MicroRNA Biogenesis Signaling Pathway,Mitotic Metaphase and Anaphase,RAN Signaling,Regulation of cholesterol biosynthesis by SREBP (SREBF),Sumoylation Pathway
hsa-miR-134-5p	miR-3118 (and other miRNAs w/seed GUGACUG)	-24,471	TargetScan Human	High (predicted)	RAN	RAN	-2,537	Chronic Myeloid Leukemia Signaling,Gene Silencing by RNA,HIF1α Signaling,MicroRNA Biogenesis Signaling Pathway,Mitotic Metaphase and Anaphase,RAN Signaling,Regulation of cholesterol biosynthesis by SREBP (SREBF),Sumoylation Pathway
hsa-miR-654-5p	miR-541-3p (and other miRNAs w/seed GGUGGGC)	-12,236	TargetScan Human	High (predicted)	RANBP10	RANBP10	-2,299	Signaling by MET
hsa-miR-149-5p	miR-149-5p (miRNAs w/seed CUGGCUC)	16,673	TargetScan Mouse,Ingenuity Expert Findings,TargetScan Human	Experimentally Observed,High (predicted)	RAP1A	RAP1A	-2,549	14-3-3-mediated Signaling,Actin Cytoskeleton Signaling,Actin Nucleation by ARP-WASP Complex,Acute Myeloid Leukemia Signaling,Acute Phase Response Signaling,Adrenomedullin signaling pathway,Agrin Interactions at Neuromuscular Junction,Angiopoietin Signaling,Antiproliferative Role of Somatostatin Receptor 2,Apelin Endothelial Signaling Pathway,Apoptosis Signaling,Autism Signaling Pathway,Axonal Gui…
hsa-miR-337-3p	miR-337-3p (miRNAs w/seed UCCUAUA)	1,962	TargetScan Human	High (predicted)	RAP1A	RAP1A	-2,549	14-3-3-mediated Signaling,Actin Cytoskeleton Signaling,Actin Nucleation by ARP-WASP Complex,Acute Myeloid Leukemia Signaling,Acute Phase Response Signaling,Adrenomedullin signaling pathway,Agrin Interactions at Neuromuscular Junction,Angiopoietin Signaling,Antiproliferative Role of Somatostatin Receptor 2,Apelin Endothelial Signaling Pathway,Apoptosis Signaling,Autism Signaling Pathway,Axonal Gui…
hsa-miR-149-5p	miR-149-5p (miRNAs w/seed CUGGCUC)	16,673	TargetScan Mouse,Ingenuity Expert Findings,TargetScan Human	Experimentally Observed,Moderate (predicted)	RAP1B	RAP1B	-3,972	14-3-3-mediated Signaling,Actin Cytoskeleton Signaling,Actin Nucleation by ARP-WASP Complex,Acute Myeloid Leukemia Signaling,Acute Phase Response Signaling,Adrenomedullin signaling pathway,Agrin Interactions at Neuromuscular Junction,Angiopoietin Signaling,Antiproliferative Role of Somatostatin Receptor 2,Apelin Endothelial Signaling Pathway,Apoptosis Signaling,Autism Signaling Pathway,Axonal Gui…
hsa-miR-92b-3p	miR-92a-3p (and other miRNAs w/seed AUUGCAC)	76,008	TargetScan Mouse,TargetScan Human	High (predicted)	RAP1B	RAP1B	-3,972	14-3-3-mediated Signaling,Actin Cytoskeleton Signaling,Actin Nucleation by ARP-WASP Complex,Acute Myeloid Leukemia Signaling,Acute Phase Response Signaling,Adrenomedullin signaling pathway,Agrin Interactions at Neuromuscular Junction,Angiopoietin Signaling,Antiproliferative Role of Somatostatin Receptor 2,Apelin Endothelial Signaling Pathway,Apoptosis Signaling,Autism Signaling Pathway,Axonal Gui…
hsa-miR-485-3p	miR-485-3p (and other miRNAs w/seed UCAUACA)	-12,236	TargetScan Human	High (predicted)	RAP2A	RAP2A	2,401	14-3-3-mediated Signaling,Actin Cytoskeleton Signaling,Actin Nucleation by ARP-WASP Complex,Acute Myeloid Leukemia Signaling,Acute Phase Response Signaling,Adrenomedullin signaling pathway,Agrin Interactions at Neuromuscular Junction,Angiopoietin Signaling,Antiproliferative Role of Somatostatin Receptor 2,Apelin Endothelial Signaling Pathway,Apoptosis Signaling,Autism Signaling Pathway,Axonal Gui…
hsa-miR-487a-5p	miR-487a-5p (and other miRNAs w/seed UGGUUAU)	-8,157	TargetScan Human	High (predicted)	RAP2A	RAP2A	2,401	14-3-3-mediated Signaling,Actin Cytoskeleton Signaling,Actin Nucleation by ARP-WASP Complex,Acute Myeloid Leukemia Signaling,Acute Phase Response Signaling,Adrenomedullin signaling pathway,Agrin Interactions at Neuromuscular Junction,Angiopoietin Signaling,Antiproliferative Role of Somatostatin Receptor 2,Apelin Endothelial Signaling Pathway,Apoptosis Signaling,Autism Signaling Pathway,Axonal Gui…
hsa-miR-454-3p	miR-130a-3p (and other miRNAs w/seed AGUGCAA)	-24,471	TargetScan Mouse,TargetScan Human	High (predicted)	RAP2C	RAP2C	-8,297	Neutrophil degranulation
hsa-miR-496	miR-503-3p (and other miRNAs w/seed GAGUAUU)	-8,157	TargetScan Human	High (predicted)	RAP2C	RAP2C	-8,297	Neutrophil degranulation
hsa-miR-99a-5p	miR-100-5p (and other miRNAs w/seed ACCCGUA)	7,437	TargetScan Human	High (predicted)	RASGRP3	RASGRP3	-2,259	Pancreatic Secretion Signaling Pathway,RAF/MAP kinase cascade,Signaling by the B Cell Receptor (BCR),Systemic Lupus Erythematosus in B Cell Signaling Pathway
hsa-miR-323a-5p	miR-323-5p (and other miRNAs w/seed GGUGGUC)	-8,157	TargetScan Mouse,TargetScan Human	High (predicted),Moderate (predicted)	RBBP4	RBBP4	-1,845	Activation of anterior HOX genes in hindbrain during early embryogenesis,Adipogenesis pathway,DNA Methylation and Transcriptional Repression Signaling,ERCC6 (CSB) and EHMT2 (G9a) positively regulate rRNA expression,HOTAIR Regulatory Pathway,Macrophage Classical Activation Signaling Pathway,Mitotic G1 phase and G1/S transition,Mitotic G2-G2/M phases,Multiple Sclerosis Signaling Pathway,NER (Nucleo…
hsa-miR-454-3p	miR-130a-3p (and other miRNAs w/seed AGUGCAA)	-24,471	TargetScan Human	High (predicted)	RBM25	RBM25	-6,742	Processing of Capped Intron-Containing Pre-mRNA
hsa-miR-2682-3p	miR-2682-3p (and other miRNAs w/seed GCCUCUU)	-24,471	TargetScan Mouse,TargetScan Human	High (predicted)	RBM39	RBM39	-2,104	Processing of Capped Intron-Containing Pre-mRNA
hsa-miR-625-5p	miR-625-5p (and other miRNAs w/seed GGGGGAA)	-8,157	TargetScan Mouse,TargetScan Human	High (predicted)	RBMX	RBMX	-1,909	Processing of Capped Intron-Containing Pre-mRNA,RHO GTPase cycle
hsa-miR-204-5p	miR-204-5p (and other miRNAs w/seed UCCCUUU)	85,448	TargetScan Human	High (predicted)	RBMX2	RBMX2	9,510	Processing of Capped Intron-Containing Pre-mRNA,Spliceosomal Cycle
hsa-miR-2682-3p	miR-2682-3p (and other miRNAs w/seed GCCUCUU)	-24,471	TargetScan Human	High (predicted)	RER1	RER1	2,739	Protein Sorting Signaling Pathway
hsa-miR-3152-5p	miR-3152-5p (miRNAs w/seed UUGCCUC)	-24,471	TargetScan Human	High (predicted)	RER1	RER1	2,739	Protein Sorting Signaling Pathway
hsa-miR-424-3p	miR-424-3p (miRNAs w/seed AAAACGU)	-12,236	TargetScan Human	High (predicted)	RER1	RER1	2,739	Protein Sorting Signaling Pathway
hsa-miR-887-3p	miR-887-3p (miRNAs w/seed UGAACGG)	-12,236	TargetScan Human	High (predicted)	RER1	RER1	2,739	Protein Sorting Signaling Pathway
hsa-miR-935	miR-935 (miRNAs w/seed CAGUUAC)	4,781	TargetScan Human	High (predicted)	RER1	RER1	2,739	Protein Sorting Signaling Pathway
hsa-miR-197-3p	miR-197-3p (and other miRNAs w/seed UCACCAC)	-2,039	TargetScan Human	High (predicted)	RFC1	RFC1	-2,300	BER (Base Excision Repair) Pathway,DNA Damage Bypass,HDR through Homologous Recombination (HRR) or Single Strand Annealing (SSA),Hereditary Breast Cancer Signaling,Mismatch Repair in Eukaryotes,NER (Nucleotide Excision Repair, Enhanced Pathway),Nucleotide Excision Repair,Resolution of Abasic Sites (AP sites),Role of BRCA1 in DNA Damage Response,Role of CHK Proteins in Cell Cycle Checkpoint Contro…
hsa-miR-455-3p	miR-455-3p (miRNAs w/seed CAGUCCA)	-3,496	TargetScan Human	High (predicted)	RGS10	RGS10	31,581	cAMP-mediated signaling,G alpha (i) signalling events,G-Protein Coupled Receptor Signaling,Gαi Signaling,Opioid Signaling Pathway
hsa-miR-493-5p	miR-493-5p (miRNAs w/seed UGUACAU)	-24,471	TargetScan Human	High (predicted)	RGS10	RGS10	31,581	cAMP-mediated signaling,G alpha (i) signalling events,G-Protein Coupled Receptor Signaling,Gαi Signaling,Opioid Signaling Pathway
hsa-miR-92b-3p	miR-92a-3p (and other miRNAs w/seed AUUGCAC)	76,008	TargetScan Mouse,TargetScan Human	High (predicted),Moderate (predicted)	RGS17	RGS17	29,911	G alpha (i) signalling events,G alpha (q) signalling events,G alpha (z) signalling events,Opioid Signaling Pathway
hsa-miR-377-3p	miR-377-3p (miRNAs w/seed UCACACA)	-24,471	TargetScan Mouse,TargetScan Human	High (predicted)	RGS2	RGS2	-7,000	cAMP-mediated signaling,G alpha (q) signalling events,G-Protein Coupled Receptor Signaling,Gαq Signaling,Gαs Signaling,Oxytocin in Brain Signaling Pathway,Pancreatic Secretion Signaling Pathway
hsa-miR-935	miR-935 (miRNAs w/seed CAGUUAC)	4,781	TargetScan Human	High (predicted)	RGS2	RGS2	-7,000	cAMP-mediated signaling,G alpha (q) signalling events,G-Protein Coupled Receptor Signaling,Gαq Signaling,Gαs Signaling,Oxytocin in Brain Signaling Pathway,Pancreatic Secretion Signaling Pathway
hsa-miR-92b-3p	miR-92a-3p (and other miRNAs w/seed AUUGCAC)	76,008	TargetScan Human	High (predicted)	RGS3	RGS3	2,364	Axonal Guidance Signaling,Ephrin B Signaling,Ephrin Receptor Signaling,G alpha (i) signalling events,G alpha (q) signalling events,Opioid Signaling Pathway
hsa-miR-376c-5p	miR-376b-5p (and other miRNAs w/seed GUGGAUA)	-24,471	TargetScan Human	High (predicted)	RGS4	RGS4	40,524	cAMP-mediated signaling,G alpha (i) signalling events,G alpha (q) signalling events,G alpha (z) signalling events,G-Protein Coupled Receptor Signaling,Gαi Signaling,Gαq Signaling,Opioid Signaling Pathway
hsa-miR-377-3p	miR-377-3p (miRNAs w/seed UCACACA)	-24,471	TargetScan Mouse,TargetScan Human	High (predicted),Moderate (predicted)	RGS4	RGS4	40,524	cAMP-mediated signaling,G alpha (i) signalling events,G alpha (q) signalling events,G alpha (z) signalling events,G-Protein Coupled Receptor Signaling,Gαi Signaling,Gαq Signaling,Opioid Signaling Pathway
hsa-miR-155-5p	miR-155-5p (miRNAs w/seed UAAUGCU)	2,493	TargetScan Mouse,TarBase,TargetScan Human,miRecords	Experimentally Observed,Moderate (predicted)	RHEB	RHEB	-2,580	Amino acids regulate mTORC1,Autism Signaling Pathway,CLEAR Signaling Pathway,Energy dependent regulation of mTOR by LKB1-AMPK,HER-2 Signaling in Breast Cancer,Macroautophagy,mTOR Signaling,MTOR signalling,Myelination Signaling Pathway,PI3K/AKT Signaling,PTEN Regulation,TP53 Regulates Metabolic Genes
hsa-miR-493-5p	miR-493-5p (miRNAs w/seed UGUACAU)	-24,471	TargetScan Mouse,TargetScan Human	High (predicted),Moderate (predicted)	RHOT1	RHOT1	-5,029	Actin Nucleation by ARP-WASP Complex,Cardiac Hypertrophy Signaling,Cholecystokinin/Gastrin-mediated Signaling,Colorectal Cancer Metastasis Signaling,CXCR4 Signaling,Deubiquitination,Germ Cell-Sertoli Cell Junction Signaling,Glioblastoma Multiforme Signaling,Glioma Invasiveness Signaling,Gαq Signaling,Hepatic Fibrosis Signaling Pathway,HMGB1 Signaling,IL-8 Signaling,ILK Signaling,Integrin Signalin…
hsa-miR-92b-3p	miR-92a-3p (and other miRNAs w/seed AUUGCAC)	76,008	TargetScan Mouse,TargetScan Human	High (predicted),Moderate (predicted)	RIC1	RIC1	-2,162	Intra-Golgi and retrograde Golgi-to-ER traffic,RAB GEFs exchange GTP for GDP on RABs
hsa-miR-501-5p	miR-501-5p (miRNAs w/seed AUCCUUU)	-24,471	TargetScan Human	High (predicted)	RICTOR	RICTOR	-3,028	Chaperone Mediated Autophagy Signaling Pathway,Costimulation by the CD28 family,IL-4 Signaling,ILK Signaling,mTOR Signaling,PIP3 activates AKT signaling,Regulation of TP53 Expression and Degradation,Signaling by VEGF
hsa-miR-127-3p	miR-127-3p (miRNAs w/seed CGGAUCC)	50,550	TargetScan Human	High (predicted)	RIPK1	RIPK1	5,146	Activation of IRF by Cytosolic Pattern Recognition Receptors,Acute Phase Response Signaling,Autophagy,Caspase activation via Death Receptors in the presence of ligand,Coronavirus Pathogenesis Pathway,Cytosolic sensors of pathogen-associated DNA,DDX58/IFIH1-mediated induction of interferon-alpha/beta,Death Receptor Signaling,Deubiquitination,Hepatic Fibrosis Signaling Pathway,Immunogenic Cell Deat…
hsa-miR-501-5p	miR-501-5p (miRNAs w/seed AUCCUUU)	-24,471	TargetScan Human	High (predicted)	RIPK2	RIPK2	2,959	Autophagy,Deubiquitination,IL-12 Signaling and Production in Macrophages,Interleukin-1 family signaling,MAP kinase activation,NLR signaling pathways,NOD1/2 Signaling Pathway,p75 NTR receptor-mediated signalling,Role of Pattern Recognition Receptors in Recognition of Bacteria and Viruses,TAK1-dependent IKK and NF-kappa-B activation,TCR signaling
hsa-miR-369-5p	miR-369-5p (miRNAs w/seed GAUCGAC)	4,536	TargetScan Human	High (predicted)	RNF111	RNF111	-2,568	Class I MHC mediated antigen processing and presentation,NER (Nucleotide Excision Repair, Enhanced Pathway),Nucleotide Excision Repair,TGF-β Signaling,Transcriptional activity of SMAD2/SMAD3:SMAD4 heterotrimer
hsa-miR-155-5p	miR-155-5p (miRNAs w/seed UAAUGCU)	2,493	TargetScan Mouse,TargetScan Human	High (predicted)	RNF123	RNF123	-2,120	Class I MHC mediated antigen processing and presentation,Deubiquitination
hsa-miR-181a-2-3p	miR-181a-2-3p (and other miRNAs w/seed CCACUGA)	-24,471	TargetScan Human	High (predicted)	RNF135	RNF135	6,540	DDX58/IFIH1-mediated induction of interferon-alpha/beta,Deubiquitination
hsa-miR-130b-5p	miR-130b-5p (and other miRNAs w/seed CUCUUUC)	-1,165	TargetScan Human	High (predicted)	RNF138	RNF138	-7,304	Class I MHC mediated antigen processing and presentation
hsa-miR-99a-5p	miR-100-5p (and other miRNAs w/seed ACCCGUA)	7,437	TargetScan Human	High (predicted)	RNF144B	RNF144B	36,922	Class I MHC mediated antigen processing and presentation
hsa-miR-377-3p	miR-377-3p (miRNAs w/seed UCACACA)	-24,471	TargetScan Mouse,TargetScan Human	High (predicted),Moderate (predicted)	RNF144B	RNF144B	36,922	Class I MHC mediated antigen processing and presentation
hsa-miR-377-3p	miR-377-3p (miRNAs w/seed UCACACA)	-24,471	TargetScan Mouse,TargetScan Human	High (predicted),Moderate (predicted)	RNF182	RNF182	12,249	Class I MHC mediated antigen processing and presentation
hsa-miR-2682-3p	miR-2682-3p (and other miRNAs w/seed GCCUCUU)	-24,471	TargetScan Human	High (predicted)	RNF185	RNF185	2,552	ABC-family proteins mediated transport
hsa-miR-323a-5p	miR-323-5p (and other miRNAs w/seed GGUGGUC)	-8,157	TargetScan Human	High (predicted)	RNF185	RNF185	2,552	ABC-family proteins mediated transport
hsa-miR-149-5p	miR-149-5p (miRNAs w/seed CUGGCUC)	16,673	TargetScan Mouse,TargetScan Human	High (predicted),Moderate (predicted)	RNF2	RNF2	-2,987	BBSome Signaling Pathway,Oxidative Stress Induced Senescence,PTEN Regulation,Senescence Pathway,SUMOylation of chromatin organization proteins,SUMOylation of DNA damage response and repair proteins,SUMOylation of DNA methylation proteins,SUMOylation of RNA binding proteins,SUMOylation of transcription cofactors,Transcriptional Regulation by E2F6,Transcriptional regulation by RUNX1
hsa-miR-1180-3p	miR-1180-3p (miRNAs w/seed UUCCGGC)	-2,225	TargetScan Human	High (predicted)	RNF5	RNF5	6,662	ABC-family proteins mediated transport
hsa-miR-199a-3p	miR-199a-3p (and other miRNAs w/seed CAGUAGU)	-1,224	TargetScan Human	High (predicted)	RNGTT	RNGTT	-4,078	3-phosphoinositide Biosynthesis,3-phosphoinositide Degradation,D-myo-inositol (1,4,5,6)-Tetrakisphosphate Biosynthesis,D-myo-inositol (3,4,5,6)-tetrakisphosphate Biosynthesis,D-myo-inositol-5-phosphate Metabolism,mRNA Capping,RNA Polymerase II Transcription,Superpathway of Inositol Phosphate Compounds
hsa-miR-137-3p	miR-137-3p (miRNAs w/seed UAUUGCU)	-8,157	TargetScan Mouse,TargetScan Human	High (predicted)	RORA	RORA	56,450	Circadian Clock,Circadian Rhythm Signaling,Generic Transcription Pathway,Heme signaling,IL-23 Signaling Pathway,IL-27 Signaling Pathway,Interleukin-4 and Interleukin-13 signaling,Melatonin Signaling,Regulation of lipid metabolism by PPARalpha,RORA activates gene expression,SUMOylation of intracellular receptors,Th17 Activation Pathway
hsa-miR-377-3p	miR-377-3p (miRNAs w/seed UCACACA)	-24,471	TargetScan Mouse,TargetScan Human	High (predicted),Moderate (predicted)	RORA	RORA	56,450	Circadian Clock,Circadian Rhythm Signaling,Generic Transcription Pathway,Heme signaling,IL-23 Signaling Pathway,IL-27 Signaling Pathway,Interleukin-4 and Interleukin-13 signaling,Melatonin Signaling,Regulation of lipid metabolism by PPARalpha,RORA activates gene expression,SUMOylation of intracellular receptors,Th17 Activation Pathway
hsa-miR-496	miR-503-3p (and other miRNAs w/seed GAGUAUU)	-8,157	TargetScan Human	High (predicted)	RPL10	RPL10	3,299	EIF2 Signaling,Eukaryotic Translation Elongation,Eukaryotic Translation Initiation,Eukaryotic Translation Termination,Major pathway of rRNA processing in the nucleolus and cytosol,Nonsense-Mediated Decay (NMD),Response of EIF2AK4 (GCN2) to amino acid deficiency,Selenoamino acid metabolism,SRP-dependent cotranslational protein targeting to membrane
hsa-miR-149-5p	miR-149-5p (miRNAs w/seed CUGGCUC)	16,673	TargetScan Human	High (predicted)	RPL13A	RPL13A	9,421	EIF2 Signaling,Eukaryotic Translation Elongation,Eukaryotic Translation Initiation,Eukaryotic Translation Termination,Major pathway of rRNA processing in the nucleolus and cytosol,Nonsense-Mediated Decay (NMD),Response of EIF2AK4 (GCN2) to amino acid deficiency,Selenoamino acid metabolism,SRP-dependent cotranslational protein targeting to membrane
hsa-miR-92b-3p	miR-92a-3p (and other miRNAs w/seed AUUGCAC)	76,008	TargetScan Mouse,TargetScan Human	High (predicted)	RPL15	RPL15	2,086	EIF2 Signaling,Eukaryotic Translation Elongation,Eukaryotic Translation Initiation,Eukaryotic Translation Termination,Major pathway of rRNA processing in the nucleolus and cytosol,Nonsense-Mediated Decay (NMD),Response of EIF2AK4 (GCN2) to amino acid deficiency,Selenoamino acid metabolism,SRP-dependent cotranslational protein targeting to membrane
hsa-let-7a-2-3p	let-7a-2-3p (and other miRNAs w/seed UGUACAG)	2,248	TargetScan Human	High (predicted)	RPL23A	RPL23A	3,539	EIF2 Signaling,Eukaryotic Translation Elongation,Eukaryotic Translation Initiation,Eukaryotic Translation Termination,Major pathway of rRNA processing in the nucleolus and cytosol,Nonsense-Mediated Decay (NMD),Response of EIF2AK4 (GCN2) to amino acid deficiency,Selenoamino acid metabolism,SRP-dependent cotranslational protein targeting to membrane
hsa-miR-485-3p	miR-485-3p (and other miRNAs w/seed UCAUACA)	-12,236	TargetScan Human	High (predicted)	RPL23A	RPL23A	3,539	EIF2 Signaling,Eukaryotic Translation Elongation,Eukaryotic Translation Initiation,Eukaryotic Translation Termination,Major pathway of rRNA processing in the nucleolus and cytosol,Nonsense-Mediated Decay (NMD),Response of EIF2AK4 (GCN2) to amino acid deficiency,Selenoamino acid metabolism,SRP-dependent cotranslational protein targeting to membrane
hsa-miR-3130-5p	miR-3130-5p (and other miRNAs w/seed ACCCAGU)	-24,471	TargetScan Human	High (predicted)	RPL37	RPL37	2,761	EIF2 Signaling,Eukaryotic Translation Elongation,Eukaryotic Translation Initiation,Eukaryotic Translation Termination,Major pathway of rRNA processing in the nucleolus and cytosol,Nonsense-Mediated Decay (NMD),Response of EIF2AK4 (GCN2) to amino acid deficiency,Selenoamino acid metabolism,SRP-dependent cotranslational protein targeting to membrane
hsa-miR-485-5p	miR-485-5p (and other miRNAs w/seed GAGGCUG)	-4,079	TargetScan Human	High (predicted)	RPL37	RPL37	2,761	EIF2 Signaling,Eukaryotic Translation Elongation,Eukaryotic Translation Initiation,Eukaryotic Translation Termination,Major pathway of rRNA processing in the nucleolus and cytosol,Nonsense-Mediated Decay (NMD),Response of EIF2AK4 (GCN2) to amino acid deficiency,Selenoamino acid metabolism,SRP-dependent cotranslational protein targeting to membrane
hsa-miR-501-5p	miR-501-5p (miRNAs w/seed AUCCUUU)	-24,471	TargetScan Human	High (predicted)	RPL37	RPL37	2,761	EIF2 Signaling,Eukaryotic Translation Elongation,Eukaryotic Translation Initiation,Eukaryotic Translation Termination,Major pathway of rRNA processing in the nucleolus and cytosol,Nonsense-Mediated Decay (NMD),Response of EIF2AK4 (GCN2) to amino acid deficiency,Selenoamino acid metabolism,SRP-dependent cotranslational protein targeting to membrane
hsa-miR-487b-3p	miR-487b-3p (miRNAs w/seed AUCGUAC)	-2,719	TargetScan Human	High (predicted)	RPL39L	RPL39L	25,095	EIF2 Signaling,Eukaryotic Translation Elongation,Eukaryotic Translation Initiation,Eukaryotic Translation Termination,Major pathway of rRNA processing in the nucleolus and cytosol,Nonsense-Mediated Decay (NMD),Response of EIF2AK4 (GCN2) to amino acid deficiency,Selenoamino acid metabolism,SRP-dependent cotranslational protein targeting to membrane
hsa-let-7a-2-3p	let-7a-2-3p (and other miRNAs w/seed UGUACAG)	2,248	TargetScan Human	High (predicted)	RPL7A	RPL7A	8,708	EIF2 Signaling,Eukaryotic Translation Elongation,Eukaryotic Translation Initiation,Eukaryotic Translation Termination,Major pathway of rRNA processing in the nucleolus and cytosol,Nonsense-Mediated Decay (NMD),RAR Activation,Response of EIF2AK4 (GCN2) to amino acid deficiency,Selenoamino acid metabolism,SRP-dependent cotranslational protein targeting to membrane
hsa-miR-214-3p	miR-214-3p (and other miRNAs w/seed CAGCAGG)	-4,894	TargetScan Human	High (predicted)	RPP25	RPP25	91,922	Major pathway of rRNA processing in the nucleolus and cytosol
hsa-miR-485-5p	miR-485-5p (and other miRNAs w/seed GAGGCUG)	-4,079	TargetScan Human	High (predicted)	RPP25	RPP25	91,922	Major pathway of rRNA processing in the nucleolus and cytosol
hsa-miR-625-5p	miR-625-5p (and other miRNAs w/seed GGGGGAA)	-8,157	TargetScan Mouse,TargetScan Human	High (predicted),Moderate (predicted)	RPP25	RPP25	91,922	Major pathway of rRNA processing in the nucleolus and cytosol
hsa-miR-137-3p	miR-137-3p (miRNAs w/seed UAUUGCU)	-8,157	TargetScan Mouse,TargetScan Human	High (predicted)	RPS13	RPS13	2,200	Coronavirus Pathogenesis Pathway,EIF2 Signaling,Eukaryotic Translation Elongation,Eukaryotic Translation Initiation,Eukaryotic Translation Termination,Major pathway of rRNA processing in the nucleolus and cytosol,mTOR Signaling,Nonsense-Mediated Decay (NMD),Regulation of eIF4 and p70S6K Signaling,Response of EIF2AK4 (GCN2) to amino acid deficiency,Selenoamino acid metabolism,SRP-dependent cotrans…
hsa-miR-181a-2-3p	miR-181a-2-3p (and other miRNAs w/seed CCACUGA)	-24,471	TargetScan Human	High (predicted)	RPS13	RPS13	2,200	Coronavirus Pathogenesis Pathway,EIF2 Signaling,Eukaryotic Translation Elongation,Eukaryotic Translation Initiation,Eukaryotic Translation Termination,Major pathway of rRNA processing in the nucleolus and cytosol,mTOR Signaling,Nonsense-Mediated Decay (NMD),Regulation of eIF4 and p70S6K Signaling,Response of EIF2AK4 (GCN2) to amino acid deficiency,Selenoamino acid metabolism,SRP-dependent cotrans…
hsa-miR-381-3p	miR-381-3p (and other miRNAs w/seed AUACAAG)	-12,236	TargetScan Human	High (predicted)	RPS16	RPS16	3,459	Coronavirus Pathogenesis Pathway,EIF2 Signaling,Eukaryotic Translation Elongation,Eukaryotic Translation Initiation,Eukaryotic Translation Termination,Major pathway of rRNA processing in the nucleolus and cytosol,mTOR Signaling,Nonsense-Mediated Decay (NMD),Regulation of eIF4 and p70S6K Signaling,Response of EIF2AK4 (GCN2) to amino acid deficiency,Selenoamino acid metabolism,SRP-dependent cotrans…
hsa-miR-1180-3p	miR-1180-3p (miRNAs w/seed UUCCGGC)	-2,225	TargetScan Human	High (predicted)	RPS19BP1	RPS19BP1	17,892	Cellular response to heat stress
hsa-miR-193a-5p	miR-193a-5p (miRNAs w/seed GGGUCUU)	-24,471	TargetScan Human	High (predicted)	RPS2	RPS2	18,911	Coronavirus Pathogenesis Pathway,EIF2 Signaling,Eukaryotic Translation Elongation,Eukaryotic Translation Initiation,Eukaryotic Translation Termination,Major pathway of rRNA processing in the nucleolus and cytosol,mTOR Signaling,Nonsense-Mediated Decay (NMD),Protein methylation,Regulation of eIF4 and p70S6K Signaling,Response of EIF2AK4 (GCN2) to amino acid deficiency,Selenoamino acid metabolism,S…
hsa-miR-935	miR-935 (miRNAs w/seed CAGUUAC)	4,781	TargetScan Human	High (predicted)	RPS28	RPS28	6,441	Coronavirus Pathogenesis Pathway,EIF2 Signaling,Eukaryotic Translation Elongation,Eukaryotic Translation Initiation,Eukaryotic Translation Termination,Major pathway of rRNA processing in the nucleolus and cytosol,mTOR Signaling,Nonsense-Mediated Decay (NMD),Regulation of eIF4 and p70S6K Signaling,Response of EIF2AK4 (GCN2) to amino acid deficiency,Selenoamino acid metabolism,SRP-dependent cotrans…
hsa-miR-2116-3p	miR-2116-3p (miRNAs w/seed CUCCCAU)	-24,471	TargetScan Human	High (predicted)	RPS4Y1	RPS4Y1	1769,312	Coronavirus Pathogenesis Pathway,EIF2 Signaling,Eukaryotic Translation Elongation,Eukaryotic Translation Initiation,Eukaryotic Translation Termination,Major pathway of rRNA processing in the nucleolus and cytosol,mTOR Signaling,Nonsense-Mediated Decay (NMD),Regulation of eIF4 and p70S6K Signaling,Response of EIF2AK4 (GCN2) to amino acid deficiency,Selenoamino acid metabolism,SRP-dependent cotrans…
hsa-miR-337-3p	miR-337-3p (miRNAs w/seed UCCUAUA)	1,962	TargetScan Human	High (predicted)	RPS6KA3	RPS6KA3	-3,247	Activation of NMDA receptors and postsynaptic events,Breast Cancer Regulation by Stathmin1,CNTF Signaling,Eicosanoid Signaling,ERK5 Signaling,FLT3 Signaling in Hematopoietic Progenitor Cells,Gastrin-CREB signalling pathway via PKC and MAPK,Growth Hormone Signaling,L1CAM interactions,MAPK targets/ Nuclear events mediated by MAP kinases,Melanocyte Development and Pigmentation Signaling,MSP-RON Sign…
hsa-miR-155-5p	miR-155-5p (miRNAs w/seed UAAUGCU)	2,493	TargetScan Mouse,TargetScan Human	High (predicted),Moderate (predicted)	RPS6KB1	RPS6KB1	-2,415	Acute Myeloid Leukemia Signaling,Adipogenesis pathway,AMPK Signaling,Apelin Endothelial Signaling Pathway,Autism Signaling Pathway,B Cell Receptor Signaling,Breast Cancer Regulation by Stathmin1,Cardiac Hypertrophy Signaling,Cardiac Hypertrophy Signaling (Enhanced),CNTF Signaling,Docosahexaenoic Acid (DHA) Signaling,EGF Signaling,ERBB Signaling,ERK5 Signaling,Erythropoietin Signaling Pathway,Estr…
hsa-miR-454-3p	miR-130a-3p (and other miRNAs w/seed AGUGCAA)	-24,471	TargetScan Mouse,TargetScan Human	High (predicted),Moderate (predicted)	RRAGD	RRAGD	46,469	Amino acids regulate mTORC1,CLEAR Signaling Pathway,Energy dependent regulation of mTOR by LKB1-AMPK,Macroautophagy,MTOR signalling,PTEN Regulation,TP53 Regulates Metabolic Genes
hsa-miR-3613-5p	miR-3613-5p (miRNAs w/seed GUUGUAC)	-24,471	TargetScan Human	High (predicted)	RRAGD	RRAGD	46,469	Amino acids regulate mTORC1,CLEAR Signaling Pathway,Energy dependent regulation of mTOR by LKB1-AMPK,Macroautophagy,MTOR signalling,PTEN Regulation,TP53 Regulates Metabolic Genes
hsa-miR-455-3p	miR-455-3p (miRNAs w/seed CAGUCCA)	-3,496	TargetScan Human	High (predicted)	RRM2	RRM2	-62,243	Mitotic G1 phase and G1/S transition,Pyrimidine Deoxyribonucleotides De Novo Biosynthesis I,Ribonucleotide Reductase Signaling Pathway,Transcriptional Regulation by E2F6
hsa-miR-197-3p	miR-197-3p (and other miRNAs w/seed UCACCAC)	-2,039	TargetScan Human	High (predicted)	RRP36	RRP36	3,471	Major pathway of rRNA processing in the nucleolus and cytosol
hsa-miR-485-5p	miR-485-5p (and other miRNAs w/seed GAGGCUG)	-4,079	TargetScan Human	High (predicted)	RRP36	RRP36	3,471	Major pathway of rRNA processing in the nucleolus and cytosol
hsa-miR-887-3p	miR-887-3p (miRNAs w/seed UGAACGG)	-12,236	TargetScan Human	High (predicted)	RRP36	RRP36	3,471	Major pathway of rRNA processing in the nucleolus and cytosol
hsa-miR-455-3p	miR-455-3p (miRNAs w/seed CAGUCCA)	-3,496	TargetScan Mouse,TargetScan Human	High (predicted)	RTN4	RTN4	-4,071	Axonal Guidance Signaling,ISGylation Signaling Pathway,p75 NTR receptor-mediated signalling
hsa-miR-654-5p	miR-541-3p (and other miRNAs w/seed GGUGGGC)	-12,236	TargetScan Human	High (predicted)	S100A11	S100A11	4,683	Neutrophil degranulation,S100 Family Signaling Pathway
hsa-miR-1180-3p	miR-1180-3p (miRNAs w/seed UUCCGGC)	-2,225	TargetScan Human	High (predicted)	S1PR3	S1PR3	104,384	BBSome Signaling Pathway,Breast Cancer Regulation by Stathmin1,cAMP-mediated signaling,Ceramide Signaling,CREB Signaling in Neurons,FAK Signaling,G alpha (i) signalling events,G-Protein Coupled Receptor Signaling,Gαi Signaling,Molecular Mechanisms of Cancer,Osteoarthritis Pathway,Phagosome Formation,S100 Family Signaling Pathway,Sphingosine-1-phosphate Signaling,Systemic Lupus Erythematosus in T …
hsa-miR-654-5p	miR-541-3p (and other miRNAs w/seed GGUGGGC)	-12,236	TargetScan Human	High (predicted)	SARM1	SARM1	39,521	MyD88-independent TLR4 cascade,Toll Like Receptor 3 (TLR3) Cascade
hsa-miR-625-5p	miR-625-5p (and other miRNAs w/seed GGGGGAA)	-8,157	TargetScan Human	High (predicted)	SARM1	SARM1	39,521	MyD88-independent TLR4 cascade,Toll Like Receptor 3 (TLR3) Cascade
hsa-miR-323b-3p	miR-323b-3p (miRNAs w/seed CCAAUAC)	-12,236	TargetScan Human	High (predicted)	SAT2	SAT2	348,283	HIF1α Signaling,Polyamine Regulation in Colon Cancer,Putrescine Degradation III,Spermine and Spermidine Degradation I
hsa-miR-454-3p	miR-130a-3p (and other miRNAs w/seed AGUGCAA)	-24,471	TargetScan Human	High (predicted)	SBF2	SBF2	-3,645	PI Metabolism,RAB GEFs exchange GTP for GDP on RABs
hsa-miR-127-3p	miR-127-3p (miRNAs w/seed CGGAUCC)	50,550	TargetScan Human	High (predicted)	SCARF1	SCARF1	2,868	Binding and Uptake of Ligands by Scavenger Receptors
hsa-miR-323b-3p	miR-323b-3p (miRNAs w/seed CCAAUAC)	-12,236	TargetScan Human	High (predicted)	SCOC	SCOC	-2,420	Intra-Golgi and retrograde Golgi-to-ER traffic
hsa-miR-199a-3p	miR-199a-3p (and other miRNAs w/seed CAGUAGU)	-1,224	TargetScan Human	High (predicted)	SDC2	SDC2	-9,159	Axonal Guidance Signaling,Cell surface interactions at the vascular wall,EPH-Ephrin signaling,Ephrin Receptor Signaling,Glycosaminoglycan metabolism,Granulocyte Adhesion and Diapedesis,Inhibition of Angiogenesis by TSP1,Inhibition of Matrix Metalloproteases,Post-translational protein phosphorylation,Regulation of Insulin-like Growth Factor (IGF) transport and uptake by IGFBPs,Retinoid metabolism …
hsa-miR-485-5p	miR-485-5p (and other miRNAs w/seed GAGGCUG)	-4,079	TargetScan Human	High (predicted)	SDC3	SDC3	3,339	Cell surface interactions at the vascular wall,Glycosaminoglycan metabolism,Granulocyte Adhesion and Diapedesis,Retinoid metabolism and transport,Syndecan interactions
hsa-miR-660-5p	miR-660-5p (and other miRNAs w/seed ACCCAUU)	-24,471	TargetScan Human	High (predicted)	SDC4	SDC4	23,797	Agranulocyte Adhesion and Diapedesis,Cell surface interactions at the vascular wall,CSDE1 Signaling Pathway,Glycosaminoglycan metabolism,Granulocyte Adhesion and Diapedesis,Osteoarthritis Pathway,Retinoid metabolism and transport,Syndecan interactions
hsa-miR-155-5p	miR-155-5p (miRNAs w/seed UAAUGCU)	2,493	TargetScan Mouse,TarBase,TargetScan Human	Experimentally Observed,Moderate (predicted)	SDCBP	SDCBP	2,532	Axonal Guidance Signaling,EPH-Ephrin signaling,Ephrin Receptor Signaling,FAK Signaling,L1CAM interactions,Neutrophil degranulation,RIPK1-mediated regulated necrosis
hsa-miR-410-3p	miR-344d-3p (and other miRNAs w/seed AUAUAAC)	-12,236	TargetScan Human	High (predicted)	SDHD	SDHD	2,451	Electron transport, ATP synthesis, and heat production by uncoupling proteins,Estrogen Receptor Signaling,Glucocorticoid Receptor Signaling,Hepatic Fibrosis Signaling Pathway,Huntington's Disease Signaling,Macrophage Classical Activation Signaling Pathway,Mitochondrial Dysfunction,Neutrophil Extracellular Trap Signaling Pathway,Oxidative Phosphorylation,Sirtuin Signaling Pathway,TCA Cycle II (Euk…
hsa-miR-376a-3p	miR-376a-3p (and other miRNAs w/seed UCAUAGA)	-4,894	TargetScan Human	High (predicted)	SDHD	SDHD	2,451	Electron transport, ATP synthesis, and heat production by uncoupling proteins,Estrogen Receptor Signaling,Glucocorticoid Receptor Signaling,Hepatic Fibrosis Signaling Pathway,Huntington's Disease Signaling,Macrophage Classical Activation Signaling Pathway,Mitochondrial Dysfunction,Neutrophil Extracellular Trap Signaling Pathway,Oxidative Phosphorylation,Sirtuin Signaling Pathway,TCA Cycle II (Euk…
hsa-miR-454-3p	miR-130a-3p (and other miRNAs w/seed AGUGCAA)	-24,471	TargetScan Human	High (predicted)	SEC23B	SEC23B	-3,780	Cargo concentration in the ER,Class I MHC mediated antigen processing and presentation,COPII-mediated vesicle transport,Microautophagy Signaling Pathway,Protein Sorting Signaling Pathway
hsa-miR-181a-2-3p	miR-181a-2-3p (and other miRNAs w/seed CCACUGA)	-24,471	TargetScan Human	High (predicted)	SEL1L	SEL1L	2,521	ABC-family proteins mediated transport,Hedgehog ligand biogenesis,Pre-NOTCH Expression and Processing,Unfolded protein response
hsa-miR-431-5p	miR-431-5p (and other miRNAs w/seed GUCUUGC)	-6,118	TargetScan Mouse,TargetScan Human	High (predicted)	SELENOT	SELENOT	-3,005	Antioxidant Action of Vitamin C,Thioredoxin Pathway,Vitamin-C Transport
hsa-miR-127-3p	miR-127-3p (miRNAs w/seed CGGAUCC)	50,550	TargetScan Mouse,TargetScan Human	High (predicted)	SEPTIN7	SEPTIN7	-10,073	MAPK6/MAPK4 signaling,RHOA Signaling,Signaling by Rho Family GTPases
hsa-miR-3187-3p	miR-3187-3p (miRNAs w/seed UGGCCAU)	-24,471	TargetScan Human	High (predicted)	SERPINB9	SERPINB9	3,624	Tumoricidal Function of Hepatic Natural Killer Cells
hsa-miR-199a-3p	miR-199a-3p (and other miRNAs w/seed CAGUAGU)	-1,224	TargetScan Mouse,TargetScan Human	High (predicted)	SERPINE2	SERPINE2	430,957	Dissolution of Fibrin Clot,Formation of Fibrin Clot (Clotting Cascade),p53 Signaling
hsa-miR-625-5p	miR-625-5p (and other miRNAs w/seed GGGGGAA)	-8,157	TargetScan Human	High (predicted)	SERPINE2	SERPINE2	430,957	Dissolution of Fibrin Clot,Formation of Fibrin Clot (Clotting Cascade),p53 Signaling
hsa-miR-204-5p	miR-204-5p (and other miRNAs w/seed UCCCUUU)	85,448	TargetScan Mouse,TargetScan Human	High (predicted),Moderate (predicted)	SF3B1	SF3B1	-5,080	B-WICH complex positively regulates rRNA expression,Processing of Capped Intron-Containing Pre-mRNA,Spliceosomal Cycle
hsa-miR-625-5p	miR-625-5p (and other miRNAs w/seed GGGGGAA)	-8,157	TargetScan Human	High (predicted)	SF3B3	SF3B3	-5,834	Processing of Capped Intron-Containing Pre-mRNA,Spliceosomal Cycle
hsa-miR-625-5p	miR-625-5p (and other miRNAs w/seed GGGGGAA)	-8,157	TargetScan Human	High (predicted)	SFRP1	SFRP1	40,031	Role of Macrophages, Fibroblasts and Endothelial Cells in Rheumatoid Arthritis,Role of Osteoblasts in Rheumatoid Arthritis Signaling Pathway,Role of Osteoblasts, Osteoclasts and Chondrocytes in Rheumatoid Arthritis,Role of Osteoclasts in Rheumatoid Arthritis Signaling Pathway,TCF dependent signaling in response to WNT,WNT/SHH Axonal Guidance Signaling Pathway,WNT/β-catenin Signaling
hsa-miR-199a-3p	miR-199a-3p (and other miRNAs w/seed CAGUAGU)	-1,224	TargetScan Human	High (predicted)	SGK2	SGK2	-10,749	Ion channel transport
hsa-miR-377-3p	miR-377-3p (miRNAs w/seed UCACACA)	-24,471	TargetScan Human	High (predicted)	SGK3	C8orf44-SGK3/SGK3	4,650	C-type lectin receptors (CLRs),Ion channel transport
hsa-miR-454-3p	miR-130a-3p (and other miRNAs w/seed AGUGCAA)	-24,471	TargetScan Mouse,TargetScan Human	High (predicted)	SH3D19	SH3D19	2,897	trans-Golgi Network Vesicle Budding
hsa-miR-193a-5p	miR-193a-5p (miRNAs w/seed GGGUCUU)	-24,471	TargetScan Human	High (predicted)	SHARPIN	SHARPIN	17,800	Necroptosis Signaling Pathway,Neurexins and neuroligins,NOD1/2 Signaling Pathway,PTEN Signaling,TNF signaling
hsa-miR-329-3p	miR-329-3p (and other miRNAs w/seed ACACACC)	-12,236	TargetScan Mouse,TargetScan Human	High (predicted)	SHB	SHB	4,254	FAK Signaling,Signaling by VEGF
hsa-let-7a-2-3p	let-7a-2-3p (and other miRNAs w/seed UGUACAG)	2,248	TargetScan Human	High (predicted)	SHC3	SHC3	44,325	Adrenomedullin signaling pathway,Breast Cancer Regulation by Stathmin1,CREB Signaling in Neurons,Endothelin-1 Signaling,Erythropoietin Signaling Pathway,Estrogen Receptor Signaling,G-Protein Coupled Receptor Signaling,Glioblastoma Multiforme Signaling,Gαi Signaling,Huntington's Disease Signaling,Molecular Mechanisms of Cancer,NGF Signaling,Oxytocin Signaling Pathway,RAF/MAP kinase cascade,Regulat…
hsa-miR-193b-3p	miR-193a-3p (and other miRNAs w/seed ACUGGCC)	-12,236	TargetScan Mouse,TargetScan Human	High (predicted),Moderate (predicted)	SIAH1	SIAH1	-3,112	Amyloid fiber formation,Class I MHC mediated antigen processing and presentation,Colorectal Cancer Metastasis Signaling,Netrin-1 signaling,Role of WNT/GSK-3β Signaling in the Pathogenesis of Influenza
hsa-miR-376a-3p	miR-376a-3p (and other miRNAs w/seed UCAUAGA)	-4,894	TargetScan Mouse,TargetScan Human	High (predicted),Moderate (predicted)	SIDT2	SIDT2	-2,484	Microautophagy Signaling Pathway
hsa-miR-654-5p	miR-541-3p (and other miRNAs w/seed GGUGGGC)	-12,236	TargetScan Human	High (predicted)	SIRT6	SIRT6	4,426	HDR through Homologous Recombination (HRR) or Single Strand Annealing (SSA),NAD Signaling Pathway,Pre-NOTCH Expression and Processing,PTEN Signaling,Sirtuin Signaling Pathway,Stearate Biosynthesis I (Animals),Triacylglycerol Biosynthesis
hsa-miR-134-5p	miR-3118 (and other miRNAs w/seed GUGACUG)	-24,471	TargetScan Human	High (predicted)	SLC14A1	SLC14A1	-386,358	Transport of bile salts and organic acids, metal ions and amine compounds
hsa-miR-3152-5p	miR-3152-5p (miRNAs w/seed UUGCCUC)	-24,471	TargetScan Human	High (predicted)	SLC16A1	SLC16A1	5,177	Aspirin ADME,Cell surface interactions at the vascular wall,Myelination Signaling Pathway,Neurovascular Coupling Signaling Pathway,The citric acid (TCA) cycle and respiratory electron transport,Transport of bile salts and organic acids, metal ions and amine compounds,Tumor Microenvironment Pathway,White Adipose Tissue Browning Pathway
hsa-miR-654-3p	miR-654-3p (and other miRNAs w/seed AUGUCUG)	-6,118	TargetScan Mouse,TargetScan Human	High (predicted),Moderate (predicted)	SLC16A1	SLC16A1	5,177	Aspirin ADME,Cell surface interactions at the vascular wall,Myelination Signaling Pathway,Neurovascular Coupling Signaling Pathway,The citric acid (TCA) cycle and respiratory electron transport,Transport of bile salts and organic acids, metal ions and amine compounds,Tumor Microenvironment Pathway,White Adipose Tissue Browning Pathway
hsa-miR-3187-3p	miR-3187-3p (miRNAs w/seed UGGCCAU)	-24,471	TargetScan Human	High (predicted)	SLC1A1	SLC1A1	228,404	Glutamate Receptor Signaling,Glutaminergic Receptor Signaling Pathway (Enhanced),Neurotransmitter release cycle,Transport of inorganic cations/anions and amino acids/oligopeptides
hsa-miR-137-3p	miR-137-3p (miRNAs w/seed UAUUGCU)	-8,157	TargetScan Mouse,TargetScan Human	High (predicted)	SLC1A5	SLC1A5	9,458	Autophagy,Ferroptosis Signaling Pathway,RHO GTPase cycle,Transport of inorganic cations/anions and amino acids/oligopeptides
hsa-miR-137-3p	miR-137-3p (miRNAs w/seed UAUUGCU)	-8,157	TargetScan Mouse,TargetScan Human	High (predicted)	SLC25A5	SLC25A5	-2,240	Induction of Apoptosis by HIV1,Necroptosis Signaling Pathway,Neutrophil Extracellular Trap Signaling Pathway,Sirtuin Signaling Pathway,Transport of vitamins, nucleosides, and related molecules
hsa-miR-625-5p	miR-625-5p (and other miRNAs w/seed GGGGGAA)	-8,157	TargetScan Human	High (predicted)	SLC25A5	SLC25A5	-2,240	Induction of Apoptosis by HIV1,Necroptosis Signaling Pathway,Neutrophil Extracellular Trap Signaling Pathway,Sirtuin Signaling Pathway,Transport of vitamins, nucleosides, and related molecules
hsa-miR-329-3p	miR-329-3p (and other miRNAs w/seed ACACACC)	-12,236	TargetScan Mouse,TargetScan Human	High (predicted),Moderate (predicted)	SLC26A11	SLC26A11	23,897	Transport of inorganic cations/anions and amino acids/oligopeptides
hsa-miR-3615	miR-3615 (miRNAs w/seed CUCUCGG)	-12,236	TargetScan Human	High (predicted)	SLC26A11	SLC26A11	23,897	Transport of inorganic cations/anions and amino acids/oligopeptides
hsa-miR-495-3p	miR-495-3p (and other miRNAs w/seed AACAAAC)	-12,236	TargetScan Human	High (predicted)	SLC26A2	SLC26A2	3,478	Glycosaminoglycan metabolism,Phase II - Conjugation of compounds,Transport of inorganic cations/anions and amino acids/oligopeptides
hsa-miR-149-5p	miR-149-5p (miRNAs w/seed CUGGCUC)	16,673	TargetScan Human	High (predicted)	SLC35B4	SLC35B4	-3,022	Transport of vitamins, nucleosides, and related molecules
hsa-miR-377-3p	miR-377-3p (miRNAs w/seed UCACACA)	-24,471	TargetScan Human	High (predicted)	SLC35B4	SLC35B4	-3,022	Transport of vitamins, nucleosides, and related molecules
hsa-miR-193b-3p	miR-193a-3p (and other miRNAs w/seed ACUGGCC)	-12,236	TargetScan Human	High (predicted)	SLC35D2	SLC35D2	6,494	Glycosaminoglycan metabolism,Transport of vitamins, nucleosides, and related molecules
hsa-miR-199a-3p	miR-199a-3p (and other miRNAs w/seed CAGUAGU)	-1,224	TargetScan Mouse,TargetScan Human	High (predicted),Moderate (predicted)	SLC39A10	SLC39A10	-9,183	Transport of bile salts and organic acids, metal ions and amine compounds
hsa-miR-204-5p	miR-204-5p (and other miRNAs w/seed UCCCUUU)	85,448	TargetScan Mouse,TargetScan Human	High (predicted)	SLC43A1	SLC43A1	17,094	Transport of inorganic cations/anions and amino acids/oligopeptides
hsa-miR-654-5p	miR-541-3p (and other miRNAs w/seed GGUGGGC)	-12,236	TargetScan Human	High (predicted)	SLC43A2	SLC43A2	6,856	Transport of inorganic cations/anions and amino acids/oligopeptides
hsa-miR-454-3p	miR-130a-3p (and other miRNAs w/seed AGUGCAA)	-24,471	TargetScan Mouse,TargetScan Human	High (predicted)	SLC44A1	SLC44A1	2,540	Choline catabolism,Glycerophospholipid biosynthesis,Transport of bile salts and organic acids, metal ions and amine compounds
hsa-miR-4448	miR-4448 (miRNAs w/seed GCUCCUU)	2,738	TargetScan Human	High (predicted)	SLC52A2	SLC52A2	45,274	BBSome Signaling Pathway,Breast Cancer Regulation by Stathmin1,CREB Signaling in Neurons,FAK Signaling,G-Protein Coupled Receptor Signaling,Metabolism of water-soluble vitamins and cofactors,Molecular Mechanisms of Cancer,Phagosome Formation,S100 Family Signaling Pathway
hsa-miR-377-3p	miR-377-3p (miRNAs w/seed UCACACA)	-24,471	TargetScan Human	High (predicted)	SLC6A15	SLC6A15	53,971	Transport of bile salts and organic acids, metal ions and amine compounds,Transport of inorganic cations/anions and amino acids/oligopeptides
hsa-miR-454-3p	miR-130a-3p (and other miRNAs w/seed AGUGCAA)	-24,471	TargetScan Human	High (predicted)	SLC6A6	SLC6A6	8,636	Pancreatic Secretion Signaling Pathway,Transport of bile salts and organic acids, metal ions and amine compounds,Transport of inorganic cations/anions and amino acids/oligopeptides
hsa-miR-376a-3p	miR-376a-3p (and other miRNAs w/seed UCAUAGA)	-4,894	TargetScan Human	High (predicted)	SLC7A2	SLC7A2	49,162	Transport of inorganic cations/anions and amino acids/oligopeptides
hsa-miR-495-3p	miR-495-3p (and other miRNAs w/seed AACAAAC)	-12,236	TargetScan Human	High (predicted)	SLC7A5	SLC7A5	2,433	Autophagy,Cell surface interactions at the vascular wall,NAD Signaling Pathway,Transport of inorganic cations/anions and amino acids/oligopeptides,Tryptophan catabolism
hsa-miR-214-3p	miR-214-3p (and other miRNAs w/seed CAGCAGG)	-4,894	TargetScan Human	High (predicted)	SLC9A1	SLC9A1	3,007	Actin Cytoskeleton Signaling,Aldosterone Signaling in Epithelial Cells,Apelin Cardiomyocyte Signaling Pathway,Glycosaminoglycan metabolism,Pancreatic Secretion Signaling Pathway,Signaling by Rho Family GTPases,Transport of inorganic cations/anions and amino acids/oligopeptides
hsa-miR-2682-3p	miR-2682-3p (and other miRNAs w/seed GCCUCUU)	-24,471	TargetScan Human	High (predicted)	SLK	SLK	-4,376	Mitotic Roles of Polo-Like Kinase,RHO GTPase cycle
hsa-miR-99a-5p	miR-100-5p (and other miRNAs w/seed ACCCGUA)	7,437	TargetScan Human	High (predicted)	SMARCA4	SMARCA4	-3,365	AMPK Signaling,Aryl Hydrocarbon Receptor Signaling,EGR2 and SOX10-mediated initiation of Schwann cell myelination,Glucocorticoid Receptor Signaling,Hereditary Breast Cancer Signaling,Interleukin-7 signaling,Myelination Signaling Pathway,RAR Activation,Ribonucleotide Reductase Signaling Pathway,Role of BRCA1 in DNA Damage Response,TCF dependent signaling in response to WNT,Transcriptional regulati…
hsa-miR-625-5p	miR-625-5p (and other miRNAs w/seed GGGGGAA)	-8,157	TargetScan Mouse,TargetScan Human	High (predicted),Moderate (predicted)	SMARCC2	SMARCC2	-3,988	Adrenomedullin signaling pathway,AMPK Signaling,Antiproliferative Role of Somatostatin Receptor 2,Circadian Rhythm Signaling,Corticotropin Releasing Hormone Signaling,Gap Junction Signaling,Glucocorticoid Receptor Signaling,Hereditary Breast Cancer Signaling,Neurovascular Coupling Signaling Pathway,Oxytocin in Spinal Neurons Signaling Pathway,Oxytocin Signaling Pathway,RAR Activation,Relaxin Sign…
hsa-miR-487a-5p	miR-487a-5p (and other miRNAs w/seed UGGUUAU)	-8,157	TargetScan Human	High (predicted)	SMN2	SMN1/SMN2	6,143	Metabolism of non-coding RNA
hsa-miR-660-5p	miR-660-5p (and other miRNAs w/seed ACCCAUU)	-24,471	TargetScan Human	High (predicted)	SMN2	SMN1/SMN2	6,143	Metabolism of non-coding RNA
hsa-miR-2116-3p	miR-2116-3p (miRNAs w/seed CUCCCAU)	-24,471	TargetScan Human	High (predicted)	SMNDC1	SMNDC1	-5,894	Processing of Capped Intron-Containing Pre-mRNA
hsa-miR-329-3p	miR-329-3p (and other miRNAs w/seed ACACACC)	-12,236	TargetScan Human	High (predicted)	SMNDC1	SMNDC1	-5,894	Processing of Capped Intron-Containing Pre-mRNA
hsa-miR-193b-3p	miR-193a-3p (and other miRNAs w/seed ACUGGCC)	-12,236	TargetScan Human	High (predicted)	SMUG1	SMUG1	3,163	BER (Base Excision Repair) Pathway,DNA Methylation and Transcriptional Repression Signaling,Resolution of Abasic Sites (AP sites)
hsa-miR-454-3p	miR-130a-3p (and other miRNAs w/seed AGUGCAA)	-24,471	TargetScan Mouse,TargetScan Human	High (predicted),Moderate (predicted)	SNAPIN	SNAPIN	2,530	trans-Golgi Network Vesicle Budding
hsa-miR-379-3p	miR-411-3p (and other miRNAs w/seed AUGUAAC)	-2,039	TargetScan Mouse,TargetScan Human	High (predicted),Moderate (predicted)	SNAPIN	SNAPIN	2,530	trans-Golgi Network Vesicle Budding
hsa-miR-654-3p	miR-654-3p (and other miRNAs w/seed AUGUCUG)	-6,118	TargetScan Human	High (predicted)	SNAPIN	SNAPIN	2,530	trans-Golgi Network Vesicle Budding
hsa-let-7a-2-3p	let-7a-2-3p (and other miRNAs w/seed UGUACAG)	2,248	TargetScan Mouse,TargetScan Human	High (predicted),Moderate (predicted)	SNCA	SNCA	670,006	14-3-3-mediated Signaling,Amyloid fiber formation,Chaperone Mediated Autophagy Signaling Pathway,Huntington's Disease Signaling,Mitochondrial Dysfunction,Neuroinflammation Signaling Pathway,Parkinson's Signaling,SNARE Signaling Pathway,Sumoylation Pathway,Synaptogenesis Signaling Pathway
hsa-miR-370-3p	miR-370-3p (and other miRNAs w/seed CCUGCUG)	-6,118	TargetScan Human	High (predicted)	SNRNP25	SNRNP25	3,050	Processing of Capped Intron-Containing Pre-mRNA,Systemic Lupus Erythematosus Signaling
hsa-miR-1180-3p	miR-1180-3p (miRNAs w/seed UUCCGGC)	-2,225	TargetScan Human	High (predicted)	SNRPA	SNRPA	-3,081	Processing of Capped Intron-Containing Pre-mRNA,Systemic Lupus Erythematosus Signaling
hsa-miR-625-5p	miR-625-5p (and other miRNAs w/seed GGGGGAA)	-8,157	TargetScan Human	High (predicted)	SNRPA	SNRPA	-3,081	Processing of Capped Intron-Containing Pre-mRNA,Systemic Lupus Erythematosus Signaling
hsa-miR-654-5p	miR-541-3p (and other miRNAs w/seed GGUGGGC)	-12,236	TargetScan Human	High (predicted)	SNRPB	SNRPB	-2,462	Metabolism of non-coding RNA,Processing of Capped Intron-Containing Pre-mRNA,Processing of Capped Intronless Pre-mRNA,RNA Polymerase II Transcription,Systemic Lupus Erythematosus Signaling
hsa-miR-432-5p	miR-432 (and other miRNAs w/seed CUUGGAG)	-24,471	TargetScan Human	High (predicted)	SNRPD2	SNRPD2	2,222	Metabolism of non-coding RNA,Processing of Capped Intron-Containing Pre-mRNA,Systemic Lupus Erythematosus Signaling
hsa-miR-505-3p	miR-505-3p (miRNAs w/seed GUCAACA)	-12,236	TargetScan Human	High (predicted)	SNRPD2	SNRPD2	2,222	Metabolism of non-coding RNA,Processing of Capped Intron-Containing Pre-mRNA,Systemic Lupus Erythematosus Signaling
hsa-miR-134-5p	miR-3118 (and other miRNAs w/seed GUGACUG)	-24,471	TargetScan Human	High (predicted)	SNRPN	SNRPN	3,500	Processing of Capped Intron-Containing Pre-mRNA,Systemic Lupus Erythematosus Signaling
hsa-miR-214-3p	miR-214-3p (and other miRNAs w/seed CAGCAGG)	-4,894	TargetScan Human	High (predicted)	SNX12	SNX12	-1,993	Protein Sorting Signaling Pathway
hsa-miR-625-5p	miR-625-5p (and other miRNAs w/seed GGGGGAA)	-8,157	TargetScan Human	High (predicted)	SNX12	SNX12	-1,993	Protein Sorting Signaling Pathway
hsa-miR-625-5p	miR-625-5p (and other miRNAs w/seed GGGGGAA)	-8,157	TargetScan Human	High (predicted)	SNX17	SNX17	-2,149	Protein Sorting Signaling Pathway
hsa-miR-454-3p	miR-130a-3p (and other miRNAs w/seed AGUGCAA)	-24,471	TargetScan Mouse,TargetScan Human	High (predicted)	SNX2	SNX2	-2,799	Protein Sorting Signaling Pathway,trans-Golgi Network Vesicle Budding
hsa-miR-625-5p	miR-625-5p (and other miRNAs w/seed GGGGGAA)	-8,157	TargetScan Human	High (predicted)	SNX29	SNX29	4,865	Protein Sorting Signaling Pathway
hsa-miR-454-3p	miR-130a-3p (and other miRNAs w/seed AGUGCAA)	-24,471	TargetScan Mouse,TargetScan Human	High (predicted),Moderate (predicted)	SNX5	SNX5	-3,385	Protein Sorting Signaling Pathway,trans-Golgi Network Vesicle Budding
hsa-miR-454-3p	miR-130a-3p (and other miRNAs w/seed AGUGCAA)	-24,471	TargetScan Mouse,TargetScan Human	High (predicted),Moderate (predicted)	SOCS5	SOCS5	-5,205	Acute Phase Response Signaling,FAK Signaling,Growth Hormone Signaling,IGF-1 Signaling,Interleukin-4 and Interleukin-13 signaling,JAK/STAT Signaling,NAFLD Signaling Pathway,Neddylation,Prolactin Signaling,STAT3 Pathway,Type I Diabetes Mellitus Signaling,Type II Diabetes Mellitus Signaling
hsa-miR-199a-3p	miR-199a-3p (and other miRNAs w/seed CAGUAGU)	-1,224	TargetScan Human	High (predicted)	SOWAHC	SOWAHC	29,907	RHO GTPase cycle
hsa-miR-204-5p	miR-204-5p (and other miRNAs w/seed UCCCUUU)	85,448	TargetScan Human,miRecords	Experimentally Observed,High (predicted)	SOX4	SOX4	-5,785	TCF dependent signaling in response to WNT,WNT/β-catenin Signaling
hsa-miR-92b-3p	miR-92a-3p (and other miRNAs w/seed AUUGCAC)	76,008	TargetScan Mouse,TargetScan Human	High (predicted)	SOX4	SOX4	-5,785	TCF dependent signaling in response to WNT,WNT/β-catenin Signaling
hsa-miR-130b-5p	miR-130b-5p (and other miRNAs w/seed CUCUUUC)	-1,165	TargetScan Human	High (predicted)	SP100	SP100	316,807	Interferon gamma signaling,SUMOylation of DNA damage response and repair proteins,Sumoylation Pathway
hsa-miR-2682-3p	miR-2682-3p (and other miRNAs w/seed GCCUCUU)	-24,471	TargetScan Human	High (predicted)	SP100	SP100	316,807	Interferon gamma signaling,SUMOylation of DNA damage response and repair proteins,Sumoylation Pathway
hsa-miR-625-5p	miR-625-5p (and other miRNAs w/seed GGGGGAA)	-8,157	TargetScan Human	High (predicted)	SPEN	SPEN	2,708	RHO GTPase cycle
hsa-miR-454-3p	miR-130a-3p (and other miRNAs w/seed AGUGCAA)	-24,471	TargetScan Mouse,TargetScan Human	High (predicted),Moderate (predicted)	SPHK2	SPHK2	3,039	Ceramide Signaling,IL-12 Signaling and Production in Macrophages,PDGF Signaling,Phagosome Formation,Sphingolipid metabolism
hsa-miR-323a-5p	miR-323-5p (and other miRNAs w/seed GGUGGUC)	-8,157	TargetScan Human	High (predicted)	SPOP	SPOP	-4,348	Hedgehog 'on' state
hsa-miR-2116-3p	miR-2116-3p (miRNAs w/seed CUCCCAU)	-24,471	TargetScan Human	High (predicted)	SPOPL	SPOPL	-3,269	Hedgehog 'on' state
hsa-miR-3152-5p	miR-3152-5p (miRNAs w/seed UUGCCUC)	-24,471	TargetScan Human	High (predicted)	SPOPL	SPOPL	-3,269	Hedgehog 'on' state
hsa-miR-454-3p	miR-130a-3p (and other miRNAs w/seed AGUGCAA)	-24,471	TargetScan Mouse,TargetScan Human	High (predicted),Moderate (predicted)	SPRED1	SPRED1	-12,553	Chronic Myeloid Leukemia Signaling,RAF/MAP kinase cascade,Signaling by FGFR1
hsa-miR-625-5p	miR-625-5p (and other miRNAs w/seed GGGGGAA)	-8,157	TargetScan Mouse,TargetScan Human	High (predicted),Moderate (predicted)	SPRED2	SPRED2	-5,053	RAF/MAP kinase cascade,Signaling by FGFR1
hsa-miR-193a-5p	miR-193a-5p (miRNAs w/seed GGGUCUU)	-24,471	TargetScan Mouse,TargetScan Human	High (predicted)	SPRED3	SPRED3	-2,553	RAF/MAP kinase cascade
hsa-miR-625-5p	miR-625-5p (and other miRNAs w/seed GGGGGAA)	-8,157	TargetScan Mouse,TargetScan Human	High (predicted),Moderate (predicted)	SPRED3	SPRED3	-2,553	RAF/MAP kinase cascade
hsa-miR-134-5p	miR-3118 (and other miRNAs w/seed GUGACUG)	-24,471	TargetScan Mouse,TargetScan Human	High (predicted),Moderate (predicted)	SPTAN1	SPTAN1	-3,175	Apoptosis Signaling,Apoptotic execution phase,COPI-mediated anterograde transport,Death Receptor Signaling,L1CAM interactions,NCAM signaling for neurite out-growth,Nephrin family interactions,Neutrophil degranulation,RAF/MAP kinase cascade,RHO GTPase cycle,Sensory processing of sound by inner hair cells of the cochlea,Sensory processing of sound by outer hair cells of the cochlea,Sertoli Cell-Ser…
hsa-miR-137-3p	miR-137-3p (miRNAs w/seed UAUUGCU)	-8,157	TargetScan Mouse,TargetScan Human	High (predicted),Moderate (predicted)	SPTLC1	SPTLC1	3,110	Ceramide Biosynthesis,Endocannabinoid Cancer Inhibition Pathway,Sphingolipid metabolism
hsa-miR-377-3p	miR-377-3p (miRNAs w/seed UCACACA)	-24,471	TargetScan Human	High (predicted)	SPTLC1	SPTLC1	3,110	Ceramide Biosynthesis,Endocannabinoid Cancer Inhibition Pathway,Sphingolipid metabolism
hsa-miR-193b-3p	miR-193a-3p (and other miRNAs w/seed ACUGGCC)	-12,236	TargetScan Human	High (predicted)	SQSTM1	SQSTM1	4,433	Autophagy,FAT10 Signaling Pathway,Ferroptosis Signaling Pathway,Interleukin-1 family signaling,ISGylation Signaling Pathway,KEAP1-NFE2L2 pathway,Microautophagy Signaling Pathway,Mitophagy,Neddylation,NRF2-mediated Oxidative Stress Response,p75 NTR receptor-mediated signalling,Pexophagy,Senescence Pathway,Serotonin Receptor Signaling
hsa-miR-625-5p	miR-625-5p (and other miRNAs w/seed GGGGGAA)	-8,157	TargetScan Mouse,TargetScan Human	High (predicted),Moderate (predicted)	SRF	SRF	-3,580	ABRA Signaling Pathway,Cardiac Hypertrophy Signaling,Cardiac Hypertrophy Signaling (Enhanced),Cholecystokinin/Gastrin-mediated Signaling,EGF Signaling,ERK/MAPK Signaling,Extra-nuclear estrogen signaling,G-Protein Coupled Receptor Signaling,Growth Hormone Signaling,HEY1 Signaling Pathway,HOTAIR Regulatory Pathway,IGF-1 Signaling,IL-6 Signaling,LPS-stimulated MAPK Signaling,NGF-stimulated transcrip…
hsa-miR-625-5p	miR-625-5p (and other miRNAs w/seed GGGGGAA)	-8,157	TargetScan Human	High (predicted)	SRP14	SRP14	68,629	Insulin Secretion Signaling Pathway,Neutrophil degranulation,SRP-dependent cotranslational protein targeting to membrane
hsa-miR-487b-3p	miR-487b-3p (miRNAs w/seed AUCGUAC)	-2,719	TargetScan Human	High (predicted)	SRRT	SRRT	-3,167	Processing of Capped Intron-Containing Pre-mRNA,RNA polymerase II transcribes snRNA genes
hsa-miR-454-3p	miR-130a-3p (and other miRNAs w/seed AGUGCAA)	-24,471	TargetScan Mouse,TargetScan Human	High (predicted),Moderate (predicted)	SRSF2	SRSF2	-3,816	Processing of Capped Intron-Containing Pre-mRNA,RNA Polymerase II Transcription
hsa-miR-193b-3p	miR-193a-3p (and other miRNAs w/seed ACUGGCC)	-12,236	TargetScan Human	High (predicted)	SRSF2	SRSF2	-3,816	Processing of Capped Intron-Containing Pre-mRNA,RNA Polymerase II Transcription
hsa-miR-323b-3p	miR-323b-3p (miRNAs w/seed CCAAUAC)	-12,236	TargetScan Human	High (predicted)	SRSF2	SRSF2	-3,816	Processing of Capped Intron-Containing Pre-mRNA,RNA Polymerase II Transcription
hsa-miR-485-3p	miR-485-3p (and other miRNAs w/seed UCAUACA)	-12,236	TargetScan Human	High (predicted)	SRSF2	SRSF2	-3,816	Processing of Capped Intron-Containing Pre-mRNA,RNA Polymerase II Transcription
hsa-miR-625-5p	miR-625-5p (and other miRNAs w/seed GGGGGAA)	-8,157	TargetScan Human	High (predicted)	SRSF2	SRSF2	-3,816	Processing of Capped Intron-Containing Pre-mRNA,RNA Polymerase II Transcription
hsa-miR-323a-5p	miR-323-5p (and other miRNAs w/seed GGUGGUC)	-8,157	TargetScan Human	High (predicted)	SRSF5	SRSF5	-3,743	Processing of Capped Intron-Containing Pre-mRNA,RNA Polymerase II Transcription
hsa-miR-370-3p	miR-370-3p (and other miRNAs w/seed CCUGCUG)	-6,118	TargetScan Mouse,TargetScan Human	High (predicted),Moderate (predicted)	SRSF6	SRSF6	-2,205	Processing of Capped Intron-Containing Pre-mRNA,RNA Polymerase II Transcription
hsa-miR-660-5p	miR-660-5p (and other miRNAs w/seed ACCCAUU)	-24,471	TargetScan Human	High (predicted)	SRSF6	SRSF6	-2,205	Processing of Capped Intron-Containing Pre-mRNA,RNA Polymerase II Transcription
hsa-miR-193b-3p	miR-193a-3p (and other miRNAs w/seed ACUGGCC)	-12,236	TargetScan Human	High (predicted)	ST3GAL4	ST3GAL4	2,136	Glycosaminoglycan metabolism,O-linked glycosylation,Pre-NOTCH Expression and Processing
hsa-miR-197-3p	miR-197-3p (and other miRNAs w/seed UCACCAC)	-2,039	TargetScan Mouse,TargetScan Human	High (predicted),Moderate (predicted)	STAG2	STAG2	-5,596	ESR-mediated signaling,Kinetochore Metaphase Signaling Pathway,Meiotic synapsis,Mitotic Metaphase and Anaphase,Mitotic Prometaphase,Mitotic Roles of Polo-Like Kinase,Mitotic Telophase/Cytokinesis,S Phase,SUMOylation of DNA damage response and repair proteins
hsa-miR-3615	miR-3615 (miRNAs w/seed CUCUCGG)	-12,236	TargetScan Human	High (predicted)	STAG3	STAG3	6,297	Kinetochore Metaphase Signaling Pathway,Meiotic synapsis
hsa-miR-4448	miR-4448 (miRNAs w/seed GCUCCUU)	2,738	TargetScan Human	High (predicted)	STAG3	STAG3	6,297	Kinetochore Metaphase Signaling Pathway,Meiotic synapsis
hsa-miR-197-3p	miR-197-3p (and other miRNAs w/seed UCACCAC)	-2,039	TargetScan Mouse,TargetScan Human	High (predicted),Moderate (predicted)	STAM	STAM	-2,333	Cargo recognition for clathrin-mediated endocytosis,Clathrin-mediated endocytosis,Clathrin-mediated Endocytosis Signaling,Deubiquitination,Endosomal Sorting Complex Required For Transport (ESCRT),Microautophagy Signaling Pathway,RHO GTPase cycle,Signaling by EGFR,Signaling by MET
hsa-miR-379-5p	miR-379-5p (and other miRNAs w/seed GGUAGAC)	-2,225	TargetScan Human	High (predicted)	STAM2	STAM2	-2,167	Cargo recognition for clathrin-mediated endocytosis,Clathrin-mediated endocytosis,Deubiquitination,Endosomal Sorting Complex Required For Transport (ESCRT),Microautophagy Signaling Pathway,RHO GTPase cycle,Signaling by EGFR,Signaling by MET
hsa-miR-625-5p	miR-625-5p (and other miRNAs w/seed GGGGGAA)	-8,157	TargetScan Mouse,TargetScan Human	High (predicted),Moderate (predicted)	STAM2	STAM2	-2,167	Cargo recognition for clathrin-mediated endocytosis,Clathrin-mediated endocytosis,Deubiquitination,Endosomal Sorting Complex Required For Transport (ESCRT),Microautophagy Signaling Pathway,RHO GTPase cycle,Signaling by EGFR,Signaling by MET
hsa-miR-935	miR-935 (miRNAs w/seed CAGUUAC)	4,781	TargetScan Human	High (predicted)	STAT1	STAT1	-2,034	Activation of IRF by Cytosolic Pattern Recognition Receptors,Cachexia Signaling Pathway,CGAS-STING Signaling Pathway,CNTF Signaling,Colorectal Cancer Metastasis Signaling,Coronavirus Pathogenesis Pathway,Dendritic Cell Maturation,EGF Signaling,ERK/MAPK Signaling,FLT3 Signaling in Hematopoietic Progenitor Cells,Glucocorticoid Receptor Signaling,GM-CSF Signaling,Growth hormone receptor signaling,Gr…
hsa-miR-137-3p	miR-137-3p (miRNAs w/seed UAUUGCU)	-8,157	TargetScan Human	High (predicted)	STK3	STK3	-5,576	Epithelial Adherens Junction Signaling,HIPPO signaling,Signaling by Hippo
hsa-miR-193b-3p	miR-193a-3p (and other miRNAs w/seed ACUGGCC)	-12,236	TargetScan Mouse,TargetScan Human	High (predicted),Moderate (predicted)	STX16	STX16	1,925	Glutaminergic Receptor Signaling Pathway (Enhanced),Huntington's Disease Signaling,Insulin Secretion Signaling Pathway,Intra-Golgi and retrograde Golgi-to-ER traffic,Netrin Signaling,Pancreatic Secretion Signaling Pathway,Phagosome Maturation,SNARE Signaling Pathway,Synaptogenesis Signaling Pathway,Tight Junction Signaling
hsa-miR-377-3p	miR-377-3p (miRNAs w/seed UCACACA)	-24,471	TargetScan Mouse,TargetScan Human	High (predicted),Moderate (predicted)	STX16	STX16	1,925	Glutaminergic Receptor Signaling Pathway (Enhanced),Huntington's Disease Signaling,Insulin Secretion Signaling Pathway,Intra-Golgi and retrograde Golgi-to-ER traffic,Netrin Signaling,Pancreatic Secretion Signaling Pathway,Phagosome Maturation,SNARE Signaling Pathway,Synaptogenesis Signaling Pathway,Tight Junction Signaling
hsa-miR-193b-3p	miR-193a-3p (and other miRNAs w/seed ACUGGCC)	-12,236	TargetScan Mouse,TargetScan Human	High (predicted),Moderate (predicted)	STX5	STX5	2,182	Cargo concentration in the ER,COPI-mediated anterograde transport,COPII-mediated vesicle transport,Insertion of tail-anchored proteins into the endoplasmic reticulum membrane,Intra-Golgi and retrograde Golgi-to-ER traffic,RHO GTPase cycle
hsa-miR-496	miR-503-3p (and other miRNAs w/seed GAGUAUU)	-8,157	TargetScan Human	High (predicted)	SUMO1	SUMO1	-2,652	DNA Double Strand Break Response,Glucocorticoid Receptor Signaling,Hypoxia Signaling in the Cardiovascular System,Interferon gamma signaling,Mitotic Metaphase and Anaphase,Nucleotide Excision Repair,Processing and activation of SUMO,SUMOylation of chromatin organization proteins,SUMOylation of DNA damage response and repair proteins,SUMOylation of DNA methylation proteins,SUMOylation of DNA repli…
hsa-miR-455-3p	miR-455-3p (miRNAs w/seed CAGUCCA)	-3,496	TargetScan Mouse,TargetScan Human	High (predicted),Moderate (predicted)	SUV39H1	SUV39H1	-11,943	ATM Signaling,Bladder Cancer Signaling,Cell Cycle: G1/S Checkpoint Regulation,Chronic Myeloid Leukemia Signaling,Coronavirus Pathogenesis Pathway,Cyclins and Cell Cycle Regulation,DNA Methylation and Transcriptional Repression Signaling,Glioma Signaling,Molecular Mechanisms of Cancer,Non-Small Cell Lung Cancer Signaling,Ovarian Cancer Signaling,Pancreatic Adenocarcinoma Signaling,Prostate Cancer …
hsa-miR-625-5p	miR-625-5p (and other miRNAs w/seed GGGGGAA)	-8,157	TargetScan Mouse,TargetScan Human	High (predicted),Moderate (predicted)	SUV39H1	SUV39H1	-11,943	ATM Signaling,Bladder Cancer Signaling,Cell Cycle: G1/S Checkpoint Regulation,Chronic Myeloid Leukemia Signaling,Coronavirus Pathogenesis Pathway,Cyclins and Cell Cycle Regulation,DNA Methylation and Transcriptional Repression Signaling,Glioma Signaling,Molecular Mechanisms of Cancer,Non-Small Cell Lung Cancer Signaling,Ovarian Cancer Signaling,Pancreatic Adenocarcinoma Signaling,Prostate Cancer …
hsa-miR-92b-3p	miR-92a-3p (and other miRNAs w/seed AUUGCAC)	76,008	TargetScan Mouse,TargetScan Human	High (predicted),Moderate (predicted)	SVIP	SVIP	159,816	Neutrophil degranulation
hsa-miR-376c-3p	miR-376c-3p (and other miRNAs w/seed ACAUAGA)	-4,079	TargetScan Human	High (predicted)	SYF2	SYF2	4,922	Processing of Capped Intron-Containing Pre-mRNA
hsa-miR-505-3p	miR-505-3p (miRNAs w/seed GUCAACA)	-12,236	TargetScan Human	High (predicted)	SYNJ2	SYNJ2	7,318	1D-myo-inositol Hexakisphosphate Biosynthesis II (Mammalian),3-phosphoinositide Biosynthesis,3-phosphoinositide Degradation,B Cell Receptor Signaling,Clathrin-mediated endocytosis,D-myo-inositol (1,3,4)-trisphosphate Biosynthesis,D-myo-inositol (1,4,5)-trisphosphate Degradation,D-myo-inositol (1,4,5,6)-Tetrakisphosphate Biosynthesis,D-myo-inositol (3,4,5,6)-tetrakisphosphate Biosynthesis,D-myo-in…
hsa-miR-935	miR-935 (miRNAs w/seed CAGUUAC)	4,781	TargetScan Human	High (predicted)	SYNJ2	SYNJ2	7,318	1D-myo-inositol Hexakisphosphate Biosynthesis II (Mammalian),3-phosphoinositide Biosynthesis,3-phosphoinositide Degradation,B Cell Receptor Signaling,Clathrin-mediated endocytosis,D-myo-inositol (1,3,4)-trisphosphate Biosynthesis,D-myo-inositol (1,4,5)-trisphosphate Degradation,D-myo-inositol (1,4,5,6)-Tetrakisphosphate Biosynthesis,D-myo-inositol (3,4,5,6)-tetrakisphosphate Biosynthesis,D-myo-in…
hsa-miR-214-3p	miR-214-3p (and other miRNAs w/seed CAGCAGG)	-4,894	TargetScan Human	High (predicted)	SYS1	SYS1	-2,559	Intra-Golgi and retrograde Golgi-to-ER traffic
hsa-miR-155-5p	miR-155-5p (miRNAs w/seed UAAUGCU)	2,493	TargetScan Human	High (predicted)	TAOK1	TAOK1	-3,220	Cell Cycle Checkpoints,Mitotic Metaphase and Anaphase,Mitotic Prometaphase,RHO GTPases Activate Formins
hsa-miR-654-5p	miR-541-3p (and other miRNAs w/seed GGUGGGC)	-12,236	TargetScan Human	High (predicted)	TAPBP	TAPBP	6,535	Antigen Presentation Pathway,Class I MHC mediated antigen processing and presentation
hsa-miR-214-3p	miR-214-3p (and other miRNAs w/seed CAGCAGG)	-4,894	TargetScan Mouse,TargetScan Human	High (predicted),Moderate (predicted)	TAX1BP3	TAX1BP3	7,639	RHO GTPases Activate Rhotekin and Rhophilins
